# Supplementary material for: CRISPR-based herd immunity can limit phage epidemics in bacterial populations
Source: eLife. 2018 Mar 9;7:e32035. doi: 10.7554/eLife.32035 (PMC5922976; doi:10.7554/eLife.32035)
Supplement: Appendix 2—figure 1—source data 1. [file elife-32035-app2-fig1-data1.xlsx]

## Sheet: Sheet1
% Susceptible	pfu observed	pfu expected	pfu inoculated
100	26	24	24
100	20	24	24
100	24	24	24
100	27	24	24
80	18	24	30
80	28	24	30
80	26	24	30
80	26	24	30
60	27	24	40
60	16	24	40
60	21	24	40
60	23	24	40
40	16	24	60
40	14	24	60
40	27	24	60
40	18	24	60
20	13	24	120
20	17	24	120
20	20	24	120
20	11	24	120
0	0	0	120
0	0	0	120
0	0	0	120
0	0	0	120
