# Supplementary material for: CRISPR-based herd immunity can limit phage epidemics in bacterial populations
Source: eLife. 2018 Mar 9;7:e32035. doi: 10.7554/eLife.32035 (PMC5922976; doi:10.7554/eLife.32035)
Supplement: Figure 2—source data 1. [file elife-32035-fig2-data1.xlsx]

## Sheet: Burst.prob. (Fig 2A)
MOI		strain	plaque forming cells/plate				surviving cfu/plate				OVN culture conc/plate				plaque forming cells/ml				surviving cfu/ml				OVN culture conc cfu/ml
10		S	4	5	5	3	18	14	23	17	43	39	29	43	400000	500000	500000	300000	18000000	14000000	23000000	17000000	4300000000	3900000000	2900000000	4300000000
		R	8	6	8	0	10	16	14	11	41	56	39	41	800	600	800	0	10000000	16000000	14000000	11000000	4100000000	5600000000	3900000000	4100000000
10		S	59	90	78	67	17	21	19	24	46	47	40	61	5900000	9000000	7800000	6700000	17000000	21000000	19000000	24000000	4600000000	4700000000	4000000000	6100000000
		R	86	92	94	64	24	20	22	24	48	63	45	50	8600	9200	9400	6400	24000000	20000000	22000000	24000000	4800000000	6300000000	4500000000	5000000000
10		S	29	32	23	29	17	3	1	6	50	36	44	43	2900000	3200000	2300000	2900000	17000000	3000000	1000000	6000000	5000000000	3600000000	4400000000	4300000000
		R	26	17	31	27	12	6	6	4	42	43	48	44	2600	1700	3100	2700	12000000	6000000	6000000	4000000	4200000000	4300000000	4800000000	4400000000
100		S	52	55	65	39	16	14	4	11	54	48	50	54	5200000	5500000	6500000	3900000	16000000	14000000	4000000	11000000	5400000000	4800000000	5000000000	5400000000
		R	84	74	56	55	8	6	3	8	69	44	45	37	8400	7400	5600	5500	8000000	6000000	3000000	8000000	6900000000	4400000000	4500000000	3700000000
100		S	13	9	16	9	27	28	45	40	46	51	42	46	13000000	9000000	16000000	9000000	2700000	2800000	4500000	4000000	4600000000	5100000000	4200000000	4600000000
		R	8	7	11	10	45	49	37	38	35	46	48	54	8000	7000	11000	10000	4500000	4900000	3700000	3800000	3500000000	4600000000	4800000000	5400000000
100		S	8	8	26	5	75	77	62	70	52	39	56	59	8000000	8000000	26000000	5000000	7500000	7700000	6200000	7000000	5200000000	3900000000	5600000000	5900000000
		R	14	11	18	14	80	77	68	79	38	33	51	61	14000	11000	18000	14000	8000000	7700000	6800000	7900000	3800000000	3300000000	5100000000	6100000000
100		S	12	16	13	16	64	57	78	79	52	39	56	59	12000000	16000000	13000000	16000000	6400000	5700000	7800000	7900000	5200000000	3900000000	5600000000	5900000000
		R	23	27	22	22	63	51	69	61	38	33	51	61	23000	27000	22000	22000	6300000	5100000	6900000	6100000	3800000000	3300000000	5100000000	6100000000
1000		S	22	37	27	36					52	39	56	59	22000000	37000000	27000000	36000000					5200000000	3900000000	5600000000	5900000000
		R	45	35	45	62					38	33	51	61	45000	35000	45000	62000					3800000000	3300000000	5100000000	6100000000
1000		S	16	16	14	15					46	47	40	61	16000000	16000000	14000000	15000000
		R	32	24	39	44					48	63	45	50	32000	24000	39000	44000
1000		S	26	12	57	35					46	47	40	61	26000000	12000000	57000000	35000000
		R	44	45	42	209					48	63	45	50	44000	45000	42000	209000
MOI	strain	plaque forming cells/ml	sd pfc/ml	Error Δx/x	Burst prob of resistant	Abs error	Rel. error		bursting/surviving ratio	fraction of surviving cells	mean # phages/cell
10	S	425000	95742.7	0.225277	0.00129412	0.724278	0.000937301		0.0236111	0.976934	0.024
	R	550	378.594	0.688353
10	S	7350000	1.34784e+06	0.183379	0.00114286	0.245888	0.000281015		0.362963	0.733696	0.311
	R	8400	1375.98	0.163808
10	S	2825000	377492	0.133625	0.000893805	0.269484	0.000240866		0.418519	0.704961	0.351
	R	2525	590.903	0.234021
100	S	5275000	1.07199e+06	0.203221	0.00127488	0.292787	0.000373269		0.468889	0.680787	0.385
	R	6725	1417.45	0.210773
100	S	11750000	3.40343e+06	0.289654	0.000765957	0.353626	0.000270863		3.35714	0.229508	1.473
	R	9000	1825.74	0.20286
100	S	11750000	9.60469e+06	0.81742	0.00121277	0.841905	0.00102103		1.65493	0.376658	0.977
	R	14250	2872.28	0.201564
100	S	14250000	2.06155e+06	0.14467	0.00164912	0.176609	0.000291249		2.05036	0.32783	1.116
	R	23500	2380.48	0.101297
1000	S	30500000	7.23418e+06	0.237186	0.00153279	0.337221	0.000516887
	R	46750	11206.4	0.239709
1000	S	15250000	957427	0.0627821	0.00227869	0.25794	0.000587766
	R	34750	8693.87	0.250183
1000	S	32500000	1.88768e+07	0.580824	0.00261538	1.13288	0.00296292
	R	85000	82676.1	0.97266
mean values
MOI	strain	plaque forming cells/ml	sd pfc/ml	Error Δx/x	Burst prob of resistant	Abs error	Rel. error		bursting/surviving ratio	fraction of surviving cells	mean # phages/cell
10					0.00111026	0.000486394				MOI10	0.228667
100					0.00122568	0.000489103				MOI100	0.98775
1000					0.00214229	0.00135586

## Sheet: Surv.prob. (Fig 2B,2C)
surviving pfu/ml post phage challenege			Compare Means
MOI10 S (*10^7)	MOI10 R (*10^7)		Descriptive Statistics
18	10		VAR	Sample size	Mean	Standard Deviation	Variance
14	16		MOI10 S (*10^7)	12	15	7.6277	58.1818
23	14		MOI10 R (*10^7)	12	18.25	13.6324	185.841
17	11
17	12		t-test assuming equal variances (homoscedastic)
3	6		Degrees of Freedom	22
1	56		Hypothesized Mean Difference	0
6	4		Pooled Variance	122.011
17	24		Test Statistic	0.72071
21	20
19	22		Two-tailed distribution
24	24		p-level	0.47868	Critical Value (5%)	2.07387
MOI100 S (*10^6)	MOI100 R (*10^6)		Compare Means
16	8		Descriptive Statistics
14	6		VAR	Sample size	Mean	Standard Deviation	Variance
4	3		MOI100 S (*10^6)	16	7.2	3.74718	14.0413
11	8		MOI100 R (*10^6)	16	6.04375	1.70136	2.89463
2.7	4.5
2.8	4.9		t-test assuming equal variances (homoscedastic)
4.5	3.7		Degrees of Freedom	30
4	3.8		Hypothesized Mean Difference	0
7.5	8		Pooled Variance	8.46798
7.7	7.7		Test Statistic	1.12385
6.2	6.8
7	7.9		Two-tailed distribution
6.4	6.3		p-level	0.26999	Critical Value (5%)	2.04227
5.7	5.1
7.8	6.9		One-tailed distribution
7.9	6.1		Alternative hypothesis H1: Mu ? Mu0 - Less than (lower-tailed)
			p-level	0.135	Critical Value (5%)	1.69726
