# Supplementary material for: CRISPR-based herd immunity can limit phage epidemics in bacterial populations
Source: eLife. 2018 Mar 9;7:e32035. doi: 10.7554/eLife.32035 (PMC5922976; doi:10.7554/eLife.32035)
Supplement: Figure 4—source data 1. [file elife-32035-fig4-data1.xlsx]

## Sheet: Fig 6A
time [h]	pfu/ml				mean	sd	mean-sd	mean+sd
0	1900	2800	1000	3000	2175	794.906	1380.09	2969.91
2	3200	3200	2000	3200	2900	519.615	2380.38	3419.62
4	16000	11000	17000	22000	16500	3905.12	12594.9	20405.1
6	77000	83000	125000	52000	84250	26242.9	58007.1	110493
8	360000	100000	270000	170000	225000	98615.4	126385	323615
10	900000	500000	330000	410000	535000	219146	315854	754146
12	560000	450000	750000	460000	555000	120520	434480	675520
14	1310000	580000	480000	800000	792500	320420	472080	1.11292e+06
16	770000	590000	630000	780000	692500	83778	608722	776278
24	480000	730000	640000	640000	622500	90104.1	532396	712604
32	540000	730000	710000	820000	700000	101242	598758	801242

## Sheet: Fig 6B
LB dilution	Max gr [h^-1]
1	0.609967
1	0.609899
1	0.616324
1	0.612491
1	0.613994
1	0.61145
0.9	0.564278
0.9	0.5663
0.9	0.572806
0.9	0.57063
0.9	0.569409
0.9	0.566768
0.8	0.521318
0.8	0.527955
0.8	0.53331
0.8	0.533368
0.8	0.53736
0.8	0.530778
0.7	0.496119
0.7	0.509849
0.7	0.511631
0.7	0.511702
0.7	0.512255
0.7	0.511548
0.6	0.474271
0.6	0.482694
0.6	0.490617
0.6	0.492006
0.6	0.489972
0.6	0.491781
0.5	0.456327
0.5	0.46343
0.5	0.469233
0.5	0.469417
0.5	0.470617
0.5	0.469465
0.4	0.42664
0.4	0.432043
0.4	0.439235
0.4	0.435627
0.4	0.437632
0.4	0.436878
0.3	0.377122
0.3	0.383293
0.3	0.389048
0.3	0.388273
0.3	0.389855
0.3	0.390645
0.2	0.319229
0.2	0.321348
0.2	0.328879
0.2	0.322649
0.2	0.322277
0.2	0.327262
0.1	0.222343
0.1	0.220681
0.1	0.220217
0.1	0.201734
0.1	0.22523
0.1	0.226054
