# Supplementary material for: CRISPR-based herd immunity can limit phage epidemics in bacterial populations
Source: eLife. 2018 Mar 9;7:e32035. doi: 10.7554/eLife.32035 (PMC5922976; doi:10.7554/eLife.32035)
Supplement: Figure 5—source data 1. [file elife-32035-fig5-data1.xlsx]

## Sheet: LB100
T [min]	pfu/plate	pfu/ml			t-test	p-value
10	15	1500			T10 - T20	0.306165
10	20	2000			T20 - T30	0.00254604
10	5	500			T30 - T40	0.00348109
10	17	1700			T40 - T50	0.160861
20	13	1300			T50 - T60	0.860762
20	11	1100					"+-"
20	6	600			burst size	85.626	47.2645
20	11	1100			(Avg T40,T60 - Avg T1-F) / (Avg T10,T20 - Avg T10F)
30	27	27000
30	17	17000			Avg T10-T20	1225
30	36	36000			Avg T40-T60	98333.3
40	8	80000			Avg T10F	77.5
40	8	80000			CorrAvg T10-T20	1147.5	515	0.201423
40	7	70000			CorrAvg T50-T60	98255.8	31574.8	0.103268
40	11	110000
50	10	100000
50	9	90000
50	10	100000
50	14	140000			SD T10-T20	514.782
60	11	110000			SD T40-T60	31574.8
60	17	170000			SD T10F	15
60	6	60000
60	7	70000
T10Filtered	6	60
T10Filtered	7	70
T10Filtered	9	90
T10Filtered	9	90

## Sheet: LB50
T [min]	pfu/plate	pfu/ml			t-test	p-value
10	16	1600			T10 - T20	0.827565
10	17	1700			T20 - T30	0.0136759
10	22	2200			T30 - T40	0.0080242
20	16	1600			T40 - T50	0.118465
20	22	2200			T50 - T60	0.859308
20	15	1500			T60 - T70	0.766395
30	33	3300			T70 - T80	0.820294
30	48	4800			T80 - T90	0.00105756
30	36	3600
40	3	30000
40	3	30000					"+-"
40	5	50000			burst size	35.5556	16.3731
50	12	120000			Average(T40-T80)/Average(T10-T20)
50	5	50000			Avg T10-T20	1800
50	7	70000			Avg T40-T80	64000
60	13	130000			Avg T10F	0
60	5	50000			CorrAvg T10-T20	1800	316.228	0.0308642
60	4	40000			CorrAvg T50-T60	64000	29471.5	0.212054
70	9	90000
70	5	50000
70	5	50000
80	7	70000
80	6	60000			SD T10-T20	316.228
80	7	70000			SD T40-T80	29471.5
90	10	100000			T10F	0
90	11	110000
90	11	110000
T10Filtered	0	0
T10Filtered	0	0
T10Filtered	0	0
T10Filtered	0	0

## Sheet: LB20
T	pfu	pfu/ml			t-test	p-value
10	18	1800			T10 - T20	0.0269973	decrease
10	17	1700			T20 - T40	3.25379e-05
10	17	1700			T40 - T50	0.00187891
20	15	1500			T50 - T60	0.0994015
20	11	1100			T60 - T80	0.256435
20	10	1000			T80 - T100	0.0102095
40	57	5700			T120 - T120	0.00102965
40	57	5700
40	62	6200
50	17	17000
50	13	13000
50	17	17000
60	23	23000
60	19	19000					"+-"
60	18	18000			burst size	12.0455	4.20876
80	9	9000			(Avg T50,T60 / (Avg T10,T20)
80	18	18000
80	19	19000			Avg T10-T20	1466.67
100	34	34000			Avg T60-T80	17666.7
100	29	29000			Avg T10F	0
100	31	31000			CorrAvg T10-T90	1466.67	338.625	0.0533058
120	52	52000			CorrAvg T120-T210	17666.7	4633.21	0.0687789
120	60	60000
120	54	54000
T10Filtered	0	0
T10Filtered	0	0
T10Filtered	0	0			SD T10-T20	338.625
T10Filtered	0	0			SD T60-T80	4633.21
					T10F	0

## Sheet: LB0
T [min]	pfu/plate	pfu/ml			t-test	p-value
10	20	2000			T10 - T30	0.201819
10	19	1900			T30 - T60	0.286805
10	11	1100			T60 - T90	0.5225
30	15	1500			T90 - T120	0.0294004
30	11	1100			T120 - T150	0.297541
30	8	800			T150 - T180	0.341831
60	11	1100			T180 - T210	0.226313
60	22	2200			T210 - T240	0.0390205
60	15	1500			T240 - T270	0.473427
90	18	1800			T270 - T300	0.294677
90	20	2000
90	17	1700
120	23	2300
120	36	3600					"+-"
120	27	2700			burst size	3.02259	1.87921
150	29	2900			(Avg T50,T60 - Avg T1-F) / (Avg T10,T20 - Avg T10F)
150	34	3400
150	44	4400			Avg T10-T90	1558.33
180	23	2300			Avg T120-T210	3200
180	33	3300			Avg T10F	746.667
210	34	3400			CorrAvg T10-T90	811.667	459.202	0.320076
210	37	3700			CorrAvg T120-T210	2453.33	632.482	0.0664635
210	32	3200
240	27	2700
240	30	3000
240	30	3000
270	27	2700			SD T10-T90	448.144
270	33	3300			SD T120-T210	624.5
270	32	3200			SD T10F	100.167
300	21	2100
300	23	2300
300	33	3300
10F	74	740
10F	85	850
10F	65	650
