# Supplementary material for: CRISPR-based herd immunity can limit phage epidemics in bacterial populations
Source: eLife. 2018 Mar 9;7:e32035. doi: 10.7554/eLife.32035 (PMC5922976; doi:10.7554/eLife.32035)
Supplement: Figure 5—source data 2. [file elife-32035-fig5-data2.xlsx]

## Sheet: 20% LB
%S	# surviving populations			fraction surviving populations, pooled
	experiment #1	experiment #2	experiment #3
0	6	6	6	1
0.0488281	6	6	6	1
0.0976562	6	6	6	1
0.195312	6	6	6	1
0.390625	6	6	6	1
0.78125	6	6	6	1
1.5625	6	6	6	1
3.125	6	6	6	1
6.25	3	5	6	0.777778
12.5	0	3	1	0.222222
25	0	0	1	0.0555556
50	0	0	0	0

## Sheet: 50% LB
%S	# surviving populations			fraction surviving populations, pooled
	experiment #1	experiment #2	experiment #3
0	6	6	6	1
0.0488281	6	6	6	1
0.0976562	6	6	6	1
0.195312	6	6	6	1
0.390625	6	6	6	1
0.78125	6	6	6	1
1.5625	6	4	4	0.777778
3.125	5	1	0	0.333333
6.25	1	0	1	0.111111
12.5	1	0	0	0.0555556
25	0	0	0	0
50	0	0	0	0

## Sheet: 100% LB
%S	# surviving populations			fraction surviving populations, pooled
	experiment #1	experiment #2	experiment #3
0	6	6	4	1
0.0488281	6	6	4	1
0.0976562	6	6	4	1
0.195312	6	6	4	1
0.390625	6	6	4	1
0.78125	6	3	1	0.625
1.5625	2	1	1	0.25
3.125	0	0	0	0
6.25	0	0	0	0
12.5	0	0	0	0
25	0	0	0	0
50	0	0	0	0
