# Supplementary material for: CRISPR-based herd immunity can limit phage epidemics in bacterial populations
Source: eLife. 2018 Mar 9;7:e32035. doi: 10.7554/eLife.32035 (PMC5922976; doi:10.7554/eLife.32035)
Supplement: Figure 6—source data 1. [file elife-32035-fig6-data1.xlsx]

## Sheet: Radius 10s
t (h)	Radius [mm]
2.66667
3
3.33333
3.66667			0.589106	0.625505
4	0.571223		0.719203	0.740406	0.678071
4.33333	0.624648		0.799269	0.837092	0.785319
4.66667	0.654963		0.874544	0.910457	0.863095
5	0.697152	0.590858	0.946175	0.973806	0.92491
5.33333	0.730711	0.646194	1.00398	1.03221	0.989568
5.66667	0.758294	0.702044	1.06696	1.08238	1.04498
6	0.805002	0.738476	1.1215	1.12936	1.09052
6.33333	0.82322	0.789258	1.17257	1.17539	1.14201
6.66667	0.855835	0.83012	1.23142	1.21516	1.17915
7	0.898751	0.869064	1.27551	1.24836	1.22241
7.33333	0.908849	0.903814	1.31896	1.28242	1.25542
7.66667	0.927488	0.939708	1.35777	1.3156	1.28586
8	0.963684	0.968408	1.40262	1.34797	1.31308
8.33333	0.958937	0.993989	1.43379	1.36993	1.33809
8.66667	0.978954	1.01893	1.45825	1.39075	1.35614
9	1.01106	1.03669	1.49492	1.41282	1.36751
9.33333	1.00085	1.0617	1.51621	1.42761	1.38358
9.66667	1.00767	1.07981	1.54295	1.44683	1.39471
10	1.03889	1.09867	1.56852	1.45293	1.40576
10.3333	1.01781	1.11311	1.58604	1.46279	1.41907
10.6667	1.0617	1.16126	1.60337	1.47408	1.42451
11	1.03117	1.19325	1.62324	1.48081	1.4361
11.3333	1.0617	1.23829	1.63612	1.50524	1.45217
11.6667	1.02674	1.25112	1.67814	1.54724	1.47483
12	1.0617	1.27013	1.69126	1.54367	1.49271
12.3333	1.03117	1.27461	1.69909	1.54581	1.49788
12.6667	1.0617	1.27729	1.70946	1.55081	1.50304
13	1.03448	1.27551	1.71205	1.54867	1.50524
13.3333	1.05739	1.28175	1.71656	1.55863	1.50891
13.6667	1.03448	1.29591	1.72234	1.55863	1.51183
14	1.03006	1.30818	1.72491	1.56288	1.51548
14.3333	1.02785	1.31427	1.72683	1.56288	1.51913
14.6667	1.05415	1.33323	1.72875	1.58395	1.52276
15	1.02451	1.34176	1.73131	1.58604	1.52639
15.3333	1.02451	1.34939	1.73577	1.59091	1.52856
15.6667	1.04655	1.35782	1.73449	1.59508	1.52928
16	1.02562	1.36202	1.73704	1.59854	1.53
16.3333	1.02005	1.3687	1.73958	1.60406	1.53289
16.6667	1.04218	1.37453	1.73768	1.60819	1.53217
17	1.01893	1.38692	1.73895	1.60887	1.53289
17.3333	1.04872	1.39185	1.73831	1.61231	1.53361
17.6667	1.02228	1.40083	1.74022	1.61573	1.53361
18	1.04218	1.4049	1.73895	1.60956	1.53289
18.3333	1.02116	1.40896	1.74339	1.61368	1.53217
18.6667	1.04872	1.41622	1.74149	1.6171	1.53361
19	1.02116	1.42265	1.74276	1.61915	1.53361
19.3333	1.02562	1.42265	1.74339	1.61778	1.53289
19.6667	1.04981	1.42586	1.74276	1.61983	1.53145
20	1.02228	1.43065	1.74656	1.62256	1.53145
20.3333	1.05198	1.43384	1.74593	1.628	1.53289
20.6667	1.01781	1.43702	1.74593	1.62935	1.53217
21	1.02116	1.43781	1.74529	1.63206	1.53072
21.3333	1.02116	1.44177	1.74529	1.6368	1.53145
21.6667	1.05631	1.44966	1.74782	1.63206	1.53145
22	1.02674	1.45359	1.74529	1.63882	1.53361
22.3333	1.05631	1.45438	1.74909	1.64152	1.53072
22.6667	1.01893	1.45673	1.74719	1.63815	1.53
23	1.05198	1.45516	1.74529	1.64488	1.53145
23.3333	1.02228	1.46454	1.75098	1.64891	1.53289
23.6667	1.02116	1.46376	1.75035	1.65359	1.53
24	1.05307	1.47076	1.75161	1.65025	1.52783
24.3333	1.0234	1.47386	1.75098	1.65292	1.53
24.6667	1.02451	1.47154	1.74972	1.65292	1.53
25	1.02005	1.47308	1.74593	1.65359	1.53072
25.3333	1.01781	1.47618	1.74656	1.6576	1.52928
25.6667	1.01893	1.48081	1.74656	1.6576	1.52928
26	1.01893	1.4785	1.74719	1.65893	1.52856
26.3333	1.05415	1.48389	1.74212	1.6576	1.53217
26.6667	1.0234	1.48543	1.74085	1.66026	1.53
27	1.01556	1.48081	1.74149	1.6596	1.52856
27.3333	1.01331	1.48696	1.73768	1.66159	1.53145
27.6667	1.04981	1.48389	1.7364	1.6596	1.53289
28	1.01781	1.48773	1.73895	1.66624	1.53361
28.3333	1.01106	1.48696	1.73513	1.66691	1.53433
28.6667	1.05307	1.48849	1.73704	1.66359	1.53289
29	1.01781	1.49232	1.73513	1.66823	1.53577
29.3333	1.01444	1.49156	1.73131	1.66691	1.53505
29.6667	1.01219	1.49156	1.73322	1.67088	1.53577
30	1.01106	1.49232	1.73449	1.67088	1.53577
30.3333	1.04981	1.49309	1.73386	1.6722	1.53793
30.6667	1.01556	1.4969	1.73003	1.66956	1.53793
31	1.01556	1.49461	1.73322	1.67022	1.53361
31.3333	1.01331	1.49614	1.73258	1.67352	1.53577
31.6667	1.01444	1.4969	1.73194	1.66956	1.53793
32	1.00767	1.49766	1.73194	1.67616	1.53577
32.3333	1.00654	1.49919	1.73003	1.67286	1.53649
32.6667	1.03889	1.4969	1.73258	1.67352	1.53649
33	1.01219	1.49919	1.73258	1.67616	1.53289
33.3333	1.0054	1.50223	1.73131	1.68012	1.53649
33.6667	1.00654	1.50071	1.73258	1.67946	1.53721
34	1.0088	1.50147	1.73258	1.68406	1.53505
34.3333	1.00993	1.50602	1.73386	1.68603	1.53577
34.6667	1.00993	1.50753	1.73449	1.68275	1.53577
35	1.0088	1.50753	1.73386	1.68471	1.53577
35.3333	1.01106	1.50678	1.73449	1.68865	1.53361
35.6667	1.00993	1.50375	1.73322	1.6893	1.53361
36	1.0054	1.50753	1.73322	1.69322	1.53433
36.3333	1.00427	1.50678	1.73322	1.69257	1.53505
36.6667	1.00993	1.50829	1.73322	1.69126	1.53289
37	1.00654	1.50678	1.73322	1.69453	1.53289
37.3333	1.00767	1.50526	1.73386	1.69583	1.53289
37.6667	1.01106	1.5045	1.73577	1.69778	1.53649
38	1.0088	1.50829	1.73386	1.70169	1.53361
38.3333	1.00767	1.50678	1.7364	1.70493	1.53217
38.6667	1.00427	1.5098	1.73322	1.70946	1.53289
39	1.00313	1.50602	1.73194	1.70687	1.53217
39.3333	1.0054	1.50602	1.73449	1.70817	1.53217
39.6667	1.00427	1.5098	1.73194	1.71527	1.53361
40	1.00767	1.50678	1.73386	1.71334	1.53217
40.3333	1.00199	1.50526	1.73194	1.7172	1.53145
40.6667	1.00085	1.50829	1.73386	1.71592	1.53433
41	1.00654	1.5045	1.73322	1.72106	1.53361
41.3333	1.00654	1.50526	1.73194	1.71913	1.53145
41.6667	1.00654	1.50753	1.73258	1.71849	1.53289
42	1.00767	1.5098	1.73131	1.7217	1.53433
42.3333	1.00654	1.50829	1.73131	1.72363	1.53289
42.6667	1.00313	1.51056	1.73131	1.72363	1.53361
43	1.00993	1.51282	1.73386	1.72363	1.53433
43.3333	1.00427	1.50905	1.73322	1.73449	1.53505
43.6667	1.00767	1.5098	1.73386	1.73194	1.53721
44	1.00654	1.51056	1.73322	1.7364	1.53649
44.3333	1.0054	1.51056	1.73322	1.73768	1.5408
44.6667	1.00313	1.51207	1.73449	1.73194	1.54008
45	1.00427	1.51358	1.73194	1.73895	1.5408
45.3333	1.00654	1.51584	1.73322	1.73577	1.5408
45.6667	1.00767	1.51508	1.73386	1.74212	1.5408
46	1.0088	1.51584	1.73449	1.74276	1.54223
46.3333	1.0088	1.51508	1.73258	1.74466	1.54295
46.6667	1.0088	1.51734	1.73386	1.74212	1.5408
47	1.00993	1.51584	1.73322	1.74656	1.54223
47.3333	1.0054	1.51659	1.73194	1.74022	1.54152
47.6667	1.00767	1.51734	1.73258	1.74276	1.54295
48	1.0088	1.51959	1.73131	1.74656	1.54295

## Sheet: Radius 20s
t (h)	radius [mm]
2.66667
3
3.33333	0.615448	0.596623	0.668753									0.589083	0.634252	0.620156	0.679672	0.765331	0.679672	0.635992	0.678044
3.66667	0.677229	0.711728	0.759797	0.654963								0.737384	0.889545	0.848858	0.821063	0.942626	0.810223	0.789498	0.810223	0.722242	0.603905	0.678044
4	0.762795	0.777608	0.821833	0.733827	0.630104		0.637305	0.637305				0.825091	1.01707	0.99176	0.926067	1.08336	0.937925	0.914055	0.94847	0.86434	0.775373	0.920081
4.33333	0.819051	0.849143	0.891101	0.809242	0.697152		0.752252	0.733827				0.917675	1.13029	1.13906	1.01598	1.19215	1.01489	0.99953	1.0268	0.954278	0.848858	0.980553
4.66667	0.883386	0.908849	0.9625	0.874299	0.770237	0.61173	0.83012	0.812057	0.588924			0.983928	1.22417	1.24387	1.09048	1.30374	1.08744	1.08744	1.10658	1.04916	0.9589	1.0854
5	0.944552	0.9625	1.02562	0.934839	0.824604	0.665332	0.89748	0.887252	0.649716	0.649716		1.0762	1.35446	1.39228	1.18378	1.40492	1.15925	1.15734	1.16875	1.12833	1.02572	1.13322
5.33333	0.998569	1.01669	1.08192	0.996282	0.872993	0.722862	0.966049	0.940921	0.708515	0.729148		1.13809	1.45667	1.50371	1.25801	1.51834	1.23585	1.24387	1.25184	1.22055	1.12146	1.21693	0.620156
5.66667	1.04436	1.06599	1.13945	1.04436	0.92379	0.771716	1.0234	0.999711	0.758294	0.814862		1.21874	1.55998	1.61224	1.32309	1.60399	1.28924	1.30119	1.30374	1.27546	1.16969	1.24653	0.673137
6	1.10385	1.10797	1.19229	1.0997	0.975451	0.821833	1.08298	1.06277	0.810651	0.882094		1.27025	1.65887	1.7081	1.38512	1.69772	1.34873	1.3739	1.3731	1.35119	1.25449	1.32559	0.726818
6.33333	1.16028	1.1514	1.2593	1.15634	1.01444	0.870375	1.14045	1.11924	0.854501	0.944552		1.33804	1.75407	1.80744	1.44295	1.79147	1.41042	1.43604	1.44142	1.41433	1.31471	1.38671	0.772518
6.66667							1.18941	1.17688	0.907593	1.00767		1.41745	1.86106	1.91953	1.49487	1.87172	1.44754	1.4815	1.48224	1.45895	1.35201	1.4112	0.82375
7	1.27282	1.23275	1.35614	1.25385	1.10178	0.958937	1.24105	1.23645	0.955361	1.05631		1.46424	1.9481	2.00844	1.54932	1.96898	1.50665	1.54504	1.54861	1.52125	1.42057	1.48299	0.871978
7.33333	1.32981	1.26382	1.40896	1.29415	1.1304	0.991691	1.29855	1.29591	1.00427	1.1172		1.5436	2.06968	2.12657	1.59709	2.05467	1.54861	1.59015	1.58737	1.56635	1.45819	1.5125	0.915263
7.66667	1.3712	1.29239	1.44572	1.32637	1.1593	1.03117	1.34431	1.36034	1.04981	1.16519	0.594707	1.56423	2.10673	2.16213	1.62725	2.10515	1.5776	1.62793	1.62657	1.60193	1.50077	1.57198	0.936746
8	1.41138	1.31514	1.4785	1.36286	1.18941	1.06492	1.39021	1.41542	1.09659	1.22066	0.620985	1.65085	2.21963	2.26742	1.67412	2.18754	1.61018	1.66618	1.66086	1.64683	1.53283	1.59432	0.992873
8.33333	1.45516	1.34261	1.5098	1.39103	1.21128	1.09242	1.44098	1.47231	1.13644	1.26653	0.675542	1.67214	2.27811	2.32184	1.71391	2.25127	1.64616	1.71456	1.71004	1.69511	1.5804	1.65553	1.02572
8.66667	1.49843	1.3662	1.54639	1.43145	1.24105	1.11822	1.48466	1.53156	1.17105	1.31601	0.711728	1.7242	2.37316	2.41425	1.74649	2.32992	1.68989	1.75973	1.75154	1.75154	1.62249	1.70097	1.07517
9	1.5323	1.37701	1.5749	1.46765	1.27103	1.14941	1.53007	1.57852	1.21128	1.35362	0.753767	1.771	2.44789	2.48552	1.77287	2.35867	1.70032	1.75973	1.7547	1.76412	1.61635	1.68596	1.09149
9.33333	1.57127	1.39839	1.60432	1.49614	1.28619	1.1691	1.56764	1.6381	1.23737	1.40165	0.781997	1.78838	2.49794	2.53701	1.7927	2.43294	1.74396	1.81415	1.79578	1.81354	1.6728	1.76787	1.13029
9.66667	1.60859	1.41622	1.63182	1.52484	1.3108	1.19516	1.60503	1.6848	1.27013	1.44414	0.803583	1.86284	2.56689	2.61509	1.82508	2.46364	1.74902	1.81537	1.7927	1.82932	1.66352	1.74015	1.15925
10	1.62622	1.42826	1.6623	1.54934	1.33409	1.21033	1.64089	1.72693	1.30206	1.49003	0.841043	1.87113	2.62184	2.66366	1.85511	2.55004	1.79763	1.87054	1.85094	1.88877	1.72868	1.84616	1.19586
10.3333	1.67052	1.45359	1.70499	1.58645	1.3662	1.23829	1.67188	1.77579	1.32465	1.52559	0.865116	1.89811	2.68021	2.72762	1.87467	2.59046	1.82023	1.89402	1.87408	1.91665	1.75154	1.87644	1.23137
10.6667	1.72825	1.49003	1.75576	1.64852	1.40815	1.27908	1.69358	1.81958	1.35446	1.56764	0.88982	1.90101	2.70033	2.7478	1.87997	2.60832	1.81841	1.90043	1.87938	1.91434	1.75218	1.87938	1.23047
11	1.74925	1.50753	1.76806	1.66778	1.42506	1.31167	1.72495	1.85436	1.37286	1.60929	0.902551	1.92757	2.74619	2.80276	1.90276	2.65577	1.83354	1.91665	1.90508	1.9464	1.76912	1.90276	1.26239
11.3333	1.779	1.52035	1.78156	1.68276	1.43543	1.32809	1.7499	1.89694	1.39839	1.65404	0.934839	2.03305	2.89623	2.93903	1.98129	2.78098	1.92068	2.00844	1.97794	2.05145	1.87349	2.01009	1.36421
11.6667	1.79814	1.53528	1.79242	1.69694	1.44572	1.34346	1.78796	1.94329	1.43622	1.711	0.967229	2.10882	3.00043	3.04068	2.04713	2.88514	1.97346	2.09357	2.03685	2.10935	1.96842	2.09726	1.4229
12	1.81456	1.54786	1.79369	1.707	1.45045	1.36202	1.82834	1.99714	1.47541	1.7745	1.0054	2.12865	3.03595	3.08255	2.07448	2.92923	1.98296	2.13383	2.04551	2.10935	2.00016	2.14159	1.4291
12.3333	1.83457	1.56034	1.80067	1.71566	1.45281	1.37618	1.86479	2.03449	1.5045	1.82771	1.03889	2.08829	3.00669	3.0512	2.03902	2.88015	1.94924	2.05091	2.01009	2.06326	1.939	2.09832	1.40571
12.6667	1.85436	1.56982	1.81581	1.72627	1.46142	1.39349	1.89152	2.07613	1.53973	1.86479	1.06062	2.09357	3.01036	3.03558	2.04335	2.87977	1.96561	2.03685	2.00733	2.06594	1.91953	2.08033	1.40885
13	1.86968	1.58213	1.82209	1.73155	1.46298	1.40571	1.92322	2.10451	1.56545	1.8879	1.07558	2.1769	3.06096	3.08255	2.09199	2.91979	1.97122	2.00568	1.99408	2.08086	1.87172	1.99685	1.45895
13.3333	1.88124	1.59434	1.83021	1.74075	1.47154	1.41461	1.9468	2.1309	1.58357	1.91668	1.08087	2.12865	3.04939	3.06277	2.09199	2.94429	1.99795	2.05575	2.04929	2.11354	1.94299	2.09252	1.46499
13.6667	1.89513	1.60575	1.83083	1.74925	1.46998	1.42586	1.96547	2.15486	1.59291	1.93446	1.08613	2.13435	3.05518	3.06313	2.09304	2.94991	2.00237	2.04389	2.05198	2.12345	1.93615	2.0867	1.46951
14	1.90474	1.61707	1.83519	1.75965	1.47231	1.43065	1.98165	2.17803	1.60575	1.95324	1.08823	2.14159	3.07106	3.0707	2.10515	2.96933	2.01338	2.04605	2.06005	2.13176	1.9464	2.08987	1.47702
14.3333	1.91549	1.62482	1.83954	1.76871	1.47231	1.43702	1.99828	2.19837	1.62411	1.97184	1.09242	2.18349	3.10363	3.11181	2.14159	3.0144	2.04929	2.08511	2.09884	2.17436	1.96392	2.11354	1.51031
14.6667	1.92678	1.62972	1.84325	1.77257	1.47541	1.44019	2.01477	2.21954	1.63531	1.9897	1.09763	2.16774	3.09614	3.09257	2.12657	3.00669	2.03359	2.05414	2.07927	2.15906	1.95263	2.09304	1.49042
15	1.92441	1.63182	1.84449	1.78156	1.47386	1.44966	2.02944	2.23338	1.64644	2.00796	1.10281	2.17944	3.10434	3.10221	2.13124	3.01659	2.0401	2.06701	2.08405	2.17029	1.95546	2.10515	1.49782
15.3333	1.92559	1.63671	1.85067	1.78668	1.47386	1.44966	2.044	2.2451	1.65818	2.02494	1.10488	2.18602	3.11252	3.1079	2.13849	3.0261	2.04281	2.06701	2.09252	2.17538	1.9549	2.10778	1.50003
15.6667	1.93033	1.63322	1.8519	1.79496	1.47541	1.45124	2.05791	2.25979	1.6671	2.03841	1.11003	2.24636	3.14467	3.13199	2.16723	3.03231	2.03576	2.00954	2.04064	2.15342	1.89752	2.02105	1.51469
16	1.93387	1.63741	1.85128	1.7975	1.47541	1.44966	2.07117	2.27237	1.67801	2.05458	1.11003	2.20615	3.13869	3.12669	2.16111	3.05699	2.06005	2.08723	2.1104	2.18552	1.9729	2.12501	1.51688
16.3333	1.93387	1.64158	1.85128	1.80004	1.47541	1.45124	2.08216	2.28389	1.6848	2.07062	1.11003	2.21963	3.15063	3.12457	2.16825	3.06782	2.06701	2.09252	2.12189	2.19359	1.97346	2.12813	1.52849
16.6667	1.93151	1.64297	1.85682	1.80131	1.47541	1.4473	2.092	2.29237	1.69021	2.08545	1.11822	2.19661	3.12916	3.10683	2.14931	3.05011	2.03847	2.04605	2.09252	2.1606	1.94185	2.0904	1.48968
17	1.93151	1.64436	1.86234	1.80447	1.47772	1.45202	2.10125	2.30131	1.69829	2.09799	1.11822	2.2498	3.16882	3.14502	2.18552	3.08828	2.08405	2.09463	2.14416	2.20114	1.98463	2.14777	1.54861
17.3333	1.93151	1.64367	1.8605	1.8051	1.47618	1.45438	2.1083	2.30527	1.7003	2.10559	1.1223	2.31755	3.20075	3.17753	2.21864	3.10149	2.08193	2.07021	2.11301	2.20465	1.9464	2.05844	1.57409
17.6667	1.9321	1.64367	1.8605	1.80573	1.4785	1.45516	2.1137	2.30923	1.70231	2.1137	1.12331	2.23502	3.16359	3.13058	2.17385	3.08506	2.0654	2.06701	2.10987	2.18602	1.95659	2.09832	1.52415
18	1.93269	1.64644	1.86418	1.80637	1.47772	1.45359	2.11748	2.31367	1.70566	2.11802	1.12534	2.2498	3.17022	3.13939	2.18147	3.09828	2.08086	2.08193	2.12968	2.19913	1.97402	2.12136	1.54289
18.3333	1.9321	1.64782	1.86662	1.807	1.48081	1.45673	2.12286	2.31712	1.71234	2.12286	1.12534	2.27569	3.17231	3.14396	2.17741	3.08649	2.03413	2.00182	2.06326	2.1452	1.90624	2.0216	1.51761
18.6667	1.93328	1.65128	1.8654	1.81267	1.4785	1.45516	2.12554	2.31909	1.713	2.12608	1.11822	2.25029	3.17091	3.1415	2.18602	3.10755	2.08299	2.08086	2.12709	2.1946	1.97738	2.12189	1.53066
19	1.93033	1.65818	1.86601	1.81015	1.48389	1.45595	2.12983	2.32106	1.71633	2.13037	1.12331	2.2251	3.14291	3.1047	2.15445	3.08613	2.03739	2.02815	2.08352	2.14107	1.93786	2.06808	1.48894
19.3333	1.93564	1.65059	1.87029	1.81267	1.48158	1.4583	2.13037	2.32302	1.71832	2.13572	1.11618	2.2679	3.18413	3.15098	2.20164	3.12315	2.09515	2.09832	2.15547	2.20364	1.98463	2.13642	1.55075
19.6667	1.9321	1.6568	1.87334	1.81644	1.48389	1.46142	2.13198	2.324	1.72031	2.13679	1.11822	2.28344	3.19314	3.16219	2.21265	3.13164	2.10725	2.11928	2.16162	2.21365	1.99795	2.15701	1.55786
20	1.93799	1.65542	1.87394	1.81644	1.48235	1.46454	2.13732	2.32744	1.72031	2.14265	1.11618	2.26888	3.18205	3.15204	2.19762	3.12598	2.09357	2.09568	2.14055	2.20164	1.99629	2.13072	1.53643
20.3333	1.92973	1.66504	1.87759	1.81895	1.48849	1.46064	2.13679	2.32597	1.72164	2.14159	1.1172	2.2786	3.19245	3.15764	2.20465	3.13128	2.10147	2.11719	2.15496	2.21065	1.99241	2.1524	1.54932
20.6667	1.93858	1.65749	1.87881	1.81833	1.48543	1.46843	2.13785	2.32744	1.7223	2.14691	1.11618	2.28828	3.2042	3.16568	2.21814	3.14431	2.12449	2.14571	2.17385	2.22907	2.01886	2.1708	1.56352
21	1.9427	1.66093	1.87759	1.8177	1.48543	1.46532	2.14052	2.32891	1.72296	2.14903	1.11516	2.24341	3.15764	3.11145	2.16213	3.10399	2.05306	2.04281	2.08776	2.15496	1.95094	2.08193	1.49191
21.3333	1.94152	1.66161	1.88063	1.81895	1.48619	1.46843	2.14105	2.32989	1.72561	2.1485	1.11618	2.25471	3.16254	3.12457	2.17029	3.11571	2.06754	2.06273	2.0999	2.1708	1.95885	2.09937	1.51031
21.6667	1.93564	1.66847	1.88063	1.81895	1.49309	1.46376	2.14265	2.33038	1.72429	2.15274	1.1172	2.25814	3.16324	3.12103	2.16876	3.11607	2.06433	2.05091	2.09779	2.16519	1.9549	2.08776	1.50591
22	1.94563	1.65955	1.88184	1.81958	1.48926	1.46921	2.14212	2.33184	1.72561	2.15698	1.12026	2.29262	3.20971	3.16952	2.2256	3.15344	2.1328	2.16366	2.17233	2.23205	2.03033	2.17131	1.56846
22.3333	1.93269	1.66367	1.88184	1.81958	1.49538	1.46765	2.14159	2.33135	1.72825	2.15962	1.12331	2.27666	3.18656	3.15028	2.19762	3.13551	2.10147	2.08723	2.13383	2.19661	1.99019	2.13694	1.5393
22.6667	1.94387	1.65749	1.88063	1.8177	1.49003	1.46998	2.14372	2.33478	1.72957	2.16174	1.12534	2.26058	3.16952	3.12775	2.17842	3.12315	2.08033	2.06166	2.1041	2.17131	1.96336	2.10568	1.50371
23	1.94211	1.65887	1.87759	1.81581	1.49003	1.46998	2.14265	2.33527	1.72957	2.16279	1.12433	2.33702	3.21212	3.17231	2.21714	3.14256	2.09515	2.04713	2.08934	2.18956	1.94071	2.05252	1.55431
23.3333	1.93151	1.66367	1.88184	1.81581	1.49614	1.46765	2.14584	2.33478	1.72693	2.16753	1.13543	2.3032	3.2104	3.16917	2.21914	3.15589	2.1359	2.14674	2.16927	2.23106	2.0276	2.16723	1.56211
23.6667	1.93328	1.66367	1.88002	1.81204	1.49919	1.46765	2.14425	2.33673	1.72891	2.16911	1.13242	2.31373	3.21625	3.17649	2.22212	3.16289	2.14365	2.16774	2.17842	2.24636	2.04497	2.18501	1.57409
24	1.94094	1.65473	1.8782	1.80952	1.48696	1.46765	2.14638	2.33527	1.72957	2.17069	1.13543	2.31898	3.21796	3.17961	2.22808	3.16498	2.15085	2.16111	2.18197	2.24242	2.03956	2.17893	1.57619
24.3333	1.94329	1.65059	1.87394	1.80573	1.48696	1.47076	2.14638	2.33722	1.72891	2.17226	1.13443	2.26595	3.17857	3.13446	2.17538	3.12916	2.09146	2.05091	2.10515	2.17487	1.96842	2.10725	1.51031
24.6667	1.93092	1.65542	1.87699	1.80573	1.49079	1.45986	2.14372	2.33576	1.72891	2.17541	1.13945	2.27034	3.17996	3.13481	2.17792	3.13481	2.10305	2.04605	2.10515	2.17233	1.96392	2.102	1.51615
25	1.93387	1.66024	1.87577	1.80889	1.49156	1.45908	2.14584	2.33624	1.72891	2.17332	1.13342	2.31851	3.21693	3.17649	2.21963	3.16394	2.15394	2.14777	2.17589	2.23749	2.03793	2.18147	1.57409
25.3333	1.92737	1.65611	1.87516	1.80257	1.49079	1.4583	2.14584	2.33673	1.72759	2.17699	1.13543	2.32279	3.21899	3.17614	2.21714	3.16568	2.15752	2.13435	2.17131	2.23749	2.03087	2.1769	1.56987
25.6667	1.92559	1.65266	1.87212	1.80131	1.49156	1.45908	2.14531	2.3382	1.72891	2.17594	1.13543	2.2931	3.20799	3.16149	2.19963	3.15379	2.1328	2.10253	2.15394	2.20515	2.00182	2.15034	1.54861
26	1.93033	1.64782	1.87151	1.80257	1.48773	1.45986	2.14425	2.3382	1.73089	2.17803	1.13242	2.33655	3.21693	3.17718	2.20565	3.14818	2.11667	2.0276	2.09304	2.18299	1.93729	2.04659	1.55075
26.3333	1.93033	1.64575	1.87151	1.79877	1.48389	1.45986	2.14372	2.3382	1.72825	2.17751	1.13744	2.31803	3.21728	3.17822	2.20565	3.16254	2.16162	2.12449	2.16621	2.23007	2.02433	2.17335	1.56423
26.6667	1.925	1.64505	1.87455	1.80447	1.48466	1.45986	2.14372	2.33624	1.72825	2.17436	1.13844	2.34929	3.22928	3.18795	2.21465	3.15659	2.139	2.0579	2.12136	2.20364	1.95659	2.06112	1.57619
27	1.92441	1.64367	1.87151	1.7975	1.48696	1.45908	2.14372	2.33673	1.72693	2.17699	1.12737	2.28344	3.19937	3.15414	2.184	3.14642	2.12761	2.0536	2.1328	2.18855	1.9757	2.11928	1.53499
27.3333	1.92618	1.64505	1.8709	1.79496	1.48389	1.45908	2.14265	2.33722	1.72627	2.17489	1.13141	2.30847	3.21074	3.16812	2.20013	3.15554	2.14828	2.09357	2.16008	2.21065	2.00789	2.14468	1.55075
27.6667	1.925	1.6395	1.87151	1.79432	1.48158	1.45516	2.14105	2.33673	1.72495	2.17646	1.13141	2.34127	3.21522	3.17857	2.20013	3.14853	2.12136	2.01448	2.0904	2.18197	1.93501	2.0325	1.55359
28	1.92441	1.6381	1.87212	1.78923	1.48389	1.4583	2.14159	2.33624	1.72693	2.17436	1.13644	2.32707	3.21728	3.17961	2.20815	3.16638	2.16825	2.11771	2.16978	2.23007	2.02542	2.1657	1.56917
28.3333	1.92322	1.64228	1.8709	1.78923	1.48312	1.4583	2.13999	2.33771	1.72561	2.17489	1.13141	2.27617	3.1921	3.14748	2.16723	3.14326	2.12657	2.03359	2.11563	2.17538	1.96561	2.09252	1.53138
28.6667	1.92678	1.64019	1.86785	1.78668	1.48004	1.4583	2.13839	2.33624	1.72693	2.17489	1.13242	2.30368	3.20454	3.16428	2.19107	3.15344	2.139	2.07927	2.15085	2.19661	1.99685	2.12553	1.55288
29	1.92144	1.63601	1.86785	1.78732	1.48081	1.45751	2.13732	2.33771	1.72957	2.17332	1.13443	2.33655	3.22037	3.18274	2.21315	3.16673	2.1769	2.12553	2.17284	2.23106	2.02651	2.17029	1.58109
29.3333	1.92381	1.63741	1.87029	1.78348	1.48235	1.45986	2.13785	2.33722	1.72561	2.17489	1.12939	2.31469	3.20764	3.16847	2.19157	3.15414	2.14571	2.08033	2.15496	2.19762	1.98964	2.11771	1.55217
29.6667	1.92441	1.63671	1.86662	1.78028	1.48389	1.45908	2.13679	2.33576	1.72495	2.17594	1.12534	2.3474	3.21899	3.1817	2.19711	3.14783	2.12553	2.01722	2.08564	2.18096	1.93272	2.02651	1.55288
30	1.92322	1.63392	1.8709	1.7822	1.48081	1.4583	2.13625	2.33478	1.72759	2.17384	1.12635	2.28731	3.19867	3.15484	2.17131	3.14185	2.13124	2.05467	2.12657	2.18804	1.97962	2.09568	1.53715
30.3333	1.92263	1.63531	1.86846	1.77707	1.48158	1.4583	2.13625	2.33527	1.72561	2.17646	1.11924	2.29551	3.19176	3.14958	2.1708	3.14396	2.11928	2.04281	2.11719	2.18147	1.9673	2.08564	1.52922
30.6667	1.92144	1.63531	1.86785	1.779	1.47772	1.4622	2.13465	2.33429	1.72627	2.17646	1.12331	2.29262	3.19729	3.15834	2.16876	3.14256	2.13124	2.04389	2.12709	2.18045	1.97066	2.09146	1.53211
31	1.93858	1.62902	1.8654	1.76677	1.47231	1.4661	2.13411	2.3338	1.72363	2.17646	1.109	2.31373	3.20661	3.17057	2.18703	3.15134	2.14623	2.0867	2.14674	2.20164	1.99019	2.11563	1.55502
31.3333	1.925	1.63741	1.8709	1.7745	1.48081	1.45986	2.13305	2.33331	1.72363	2.17856	1.1172	2.36102	3.22996	3.19591	2.21565	3.15659	2.14468	2.04227	2.10042	2.20164	1.94697	2.0401	1.57689
31.6667	1.92737	1.63531	1.87212	1.77	1.48158	1.4622	2.13198	2.33184	1.72627	2.17541	1.11311	2.31612	3.20696	3.16987	2.19309	3.15309	2.14623	2.08511	2.14674	2.20364	1.98742	2.1104	1.55998
32	1.92973	1.63531	1.8709	1.77193	1.47772	1.46064	2.13305	2.33135	1.72693	2.17646	1.109	2.28538	3.19072	3.14958	2.16978	3.1422	2.12084	2.04335	2.11458	2.17893	1.96561	2.08617	1.53283
32.3333	1.94563	1.63322	1.87577	1.77129	1.46843	1.47076	2.13358	2.33184	1.72296	2.17541	1.10488	2.29936	3.19556	3.15799	2.17182	3.14431	2.13176	2.05521	2.12241	2.18754	1.97122	2.09199	1.53787
32.6667	1.93564	1.63322	1.87394	1.77386	1.47618	1.4622	2.13198	2.3294	1.72296	2.17646	1.0945	2.3056	3.19937	3.15974	2.18248	3.14396	2.1302	2.06701	2.12501	2.19057	1.97514	2.102	1.54145
33	1.93741	1.63462	1.87638	1.77707	1.47772	1.46454	2.13305	2.33038	1.72363	2.17594	1.10281	2.33513	3.22345	3.18621	2.23304	3.16533	2.18552	2.15342	2.1708	2.23749	2.03141	2.16315	1.58946
33.3333	1.93741	1.63671	1.8782	1.77322	1.47927	1.4622	2.13251	2.32891	1.71965	2.17803	1.09659	2.36382	3.22654	3.1928	2.22709	3.15098	2.13849	2.04605	2.09463	2.19611	1.92986	2.03631	1.58249
33.6667	1.94152	1.63671	1.88063	1.77579	1.4785	1.4661	2.12983	2.32793	1.72098	2.18118	1.09659	2.30752	3.20006	3.16079	2.18956	3.14502	2.13487	2.05252	2.13072	2.19309	1.97122	2.09463	1.55146
34	1.94152	1.63741	1.87942	1.77386	1.47927	1.46376	2.13037	2.32793	1.72031	2.17961	1.0945	2.29696	3.20075	3.16463	2.19409	3.14537	2.13952	2.06808	2.13642	2.19107	1.97346	2.10095	1.55502
34.3333	1.9509	1.63112	1.87759	1.77129	1.47541	1.47618	2.13037	2.32891	1.71832	2.1817	1.09137	2.34316	3.2135	3.17892	2.20314	3.13551	2.1062	2.00789	2.05951	2.17893	1.89811	2.01064	1.55431
34.6667	1.94152	1.63741	1.88002	1.78156	1.48312	1.46765	2.13037	2.32842	1.71899	2.1864	1.08298	2.3166	3.20661	3.1744	2.21265	3.15028	2.15034	2.08352	2.1452	2.21115	1.98352	2.11354	1.56987
35	1.94387	1.64089	1.88063	1.77836	1.48235	1.47618	2.1293	2.32695	1.71899	2.18796	1.08928	2.35164	3.22071	3.18656	2.22262	3.14396	2.12136	2.01558	2.08564	2.18703	1.91607	2.02542	1.57268
35.3333	1.94563	1.6388	1.88124	1.779	1.48158	1.46998	2.1293	2.32695	1.72098	2.18588	1.08928	2.30608	3.19729	3.15974	2.18602	3.14396	2.13745	2.05306	2.13383	2.19862	1.98296	2.09937	1.55431
35.6667	1.95965	1.63392	1.88063	1.77643	1.47463	1.48543	2.1293	2.32548	1.71699	2.18744	1.08508	2.35774	3.22483	3.19037	2.22808	3.14712	2.1328	2.03087	2.09726	2.1951	1.927	2.0325	1.58319
36	1.94856	1.63741	1.88548	1.78028	1.48158	1.47695	2.12983	2.32646	1.71633	2.18953	1.08298	2.30032	3.19556	3.15589	2.19107	3.14185	2.13487	2.04929	2.11824	2.19157	1.96448	2.09252	1.55431
36.3333	1.94798	1.6388	1.88427	1.78156	1.48312	1.47618	2.12823	2.32449	1.71699	2.19161	1.07239	2.36943	3.22928	3.19453	2.23353	3.14993	2.13745	2.0325	2.10305	2.20515	1.93615	2.03576	1.58807
36.6667	1.94856	1.63741	1.88184	1.7822	1.48389	1.48158	2.1309	2.32449	1.71965	2.19057	1.07875	2.33939	3.22722	3.19245	2.2439	3.16463	2.19107	2.1769	2.17385	2.24587	2.03793	2.17944	1.60399
37	1.94505	1.6388	1.88487	1.77193	1.48849	1.48466	2.12769	2.32498	1.72031	2.19265	1.07026	2.36803	3.23372	3.19522	2.24045	3.15414	2.14416	2.04227	2.11301	2.21115	1.94753	2.04281	1.60331
37.3333	1.95441	1.6388	1.88608	1.78092	1.48466	1.48389	2.12983	2.32597	1.71832	2.19317	1.08192	2.31469	3.20902	3.1744	2.21415	3.15169	2.15496	2.08987	2.15445	2.21265	2.00403	2.12397	1.57689
37.6667	1.95324	1.64158	1.88306	1.78092	1.48235	1.48389	2.1293	2.32498	1.71699	2.19525	1.07026	2.30895	3.20213	3.16498	2.21215	3.14607	2.14416	2.06808	2.1359	2.20013	1.98352	2.10987	1.56846
38	1.96547	1.63671	1.88245	1.78028	1.47541	1.48849	2.1293	2.32351	1.71699	2.19525	1.07558	2.37502	3.23987	3.19937	2.24587	3.15729	2.1524	2.06219	2.11928	2.21615	1.95037	2.04389	1.60606
38.3333	1.95266	1.64367	1.8885	1.77964	1.48235	1.48389	2.12876	2.32351	1.71766	2.19421	1.07133	2.32422	3.2135	3.18378	2.23007	3.15379	2.16366	2.12968	2.16213	2.22212	2.01503	2.14159	1.59015
38.6667	1.95499	1.64089	1.88971	1.7854	1.48543	1.48773	2.1293	2.32351	1.71699	2.19473	1.07452	2.34505	3.2303	3.1966	2.24931	3.17161	2.20214	2.17538	2.19006	2.25471	2.04767	2.18754	1.6143
39	1.95674	1.64713	1.89333	1.78923	1.48619	1.49079	2.1293	2.32351	1.71699	2.19681	1.06706	2.35023	3.2327	3.1966	2.25275	3.17057	2.1951	2.17893	2.19157	2.25373	2.04821	2.19107	1.61976
39.3333	1.96024	1.64297	1.89333	1.78796	1.48926	1.48696	2.12983	2.32302	1.71699	2.19629	1.07558	2.35211	3.21968	3.18482	2.22212	3.14256	2.11197	2.01393	2.08987	2.1845	1.9178	2.01448	1.58598
39.6667	1.95907	1.64644	1.89393	1.79305	1.48849	1.48849	2.13037	2.32351	1.71766	2.19629	1.07239	2.32944	3.21968	3.18587	2.23897	3.16044	2.17335	2.14107	2.17335	2.22808	2.0276	2.14674	1.59916
40	1.96663	1.64713	1.89453	1.79496	1.48926	1.49232	2.13037	2.32351	1.71633	2.19629	1.07558	2.36102	3.22483	3.18552	2.23551	3.14712	2.11667	2.01832	2.10673	2.18905	1.9247	2.02324	1.59085
40.3333	1.96547	1.64921	1.89694	1.79432	1.48926	1.49309	2.12983	2.324	1.71766	2.19992	1.06813	2.31039	3.19902	3.16463	2.21365	3.14467	2.12501	2.07927	2.14828	2.19661	1.98296	2.0999	1.57479
40.6667	1.96837	1.65197	1.89694	1.79687	1.49232	1.49232	2.12823	2.32498	1.71633	2.19785	1.07452	2.31182	3.20006	3.16603	2.21565	3.14712	2.13487	2.07927	2.14777	2.19711	1.98853	2.1104	1.5804
41	1.96663	1.65266	1.89814	1.79814	1.4969	1.49309	2.1293	2.324	1.71699	2.19577	1.07239	2.36569	3.22517	3.19037	2.24291	3.14748	2.12241	2.03793	2.11719	2.1946	1.92642	2.02324	1.5964
41.3333	1.96605	1.6499	1.89874	1.7975	1.49079	1.49003	2.13037	2.32498	1.71699	2.19889	1.07345	2.30656	3.20213	3.16952	2.22312	3.14712	2.13797	2.09304	2.15496	2.20264	1.98742	2.11092	1.58459
41.6667	1.96663	1.65335	1.90054	1.79687	1.49232	1.50071	2.13037	2.32498	1.71633	2.19889	1.06919	2.37409	3.22722	3.19314	2.24784	3.15063	2.12241	2.03576	2.11771	2.19611	1.93558	2.03141	1.60124
42	1.96314	1.65335	1.90114	1.79814	1.49461	1.49614	2.13305	2.32548	1.71832	2.19889	1.0777	2.33891	3.22448	3.1876	2.25324	3.16289	2.17385	2.16519	2.17995	2.23056	2.0325	2.16162	1.61703
42.3333	1.96953	1.6568	1.89994	1.7994	1.49614	1.49766	2.13251	2.32302	1.71766	2.19837	1.07133	2.31708	3.20696	3.17196	2.23304	3.14712	2.14107	2.102	2.15957	2.20815	1.99463	2.11824	1.58528
42.6667	1.97069	1.66024	1.89574	1.80004	1.4969	1.50071	2.1309	2.32597	1.715	2.19837	1.07664	2.37827	3.23407	3.19625	2.25324	3.15554	2.13435	2.06647	2.1359	2.20965	1.94242	2.03631	1.61293
43	1.97184	1.65542	1.89574	1.79877	1.49766	1.49995	2.13251	2.324	1.71633	2.19889	1.0777	2.32041	3.21246	3.17614	2.23897	3.15344	2.14468	2.12136	2.16672	2.21515	1.99961	2.14828	1.58807
43.3333	1.96721	1.65749	1.89994	1.7994	1.49538	1.49614	2.13358	2.32548	1.71633	2.19941	1.08087	2.31564	3.20661	3.17161	2.22957	3.14607	2.13435	2.08564	2.15906	2.20063	1.98686	2.11876	1.58807
43.6667	1.97011	1.66161	1.90234	1.80131	1.49843	1.50375	2.13358	2.32449	1.71566	2.19941	1.07981	2.38199	3.23953	3.20247	2.26107	3.15834	2.14055	2.08352	2.14468	2.21565	1.94753	2.05145	1.62181
44	1.96953	1.65611	1.90354	1.80004	1.50071	1.50375	2.13411	2.32695	1.71699	2.19941	1.08508	2.32469	3.21487	3.18135	2.24833	3.15519	2.15291	2.1198	2.17487	2.22212	2.01393	2.15034	1.60262
44.3333	1.97242	1.66024	1.90414	1.80194	1.49766	1.50223	2.13358	2.32695	1.71699	2.20096	1.08298	2.38709	3.23919	3.20247	2.26254	3.16079	2.14725	2.06968	2.14262	2.21565	1.95037	2.04875	1.61908
44.6667	1.96779	1.65818	1.90174	1.807	1.49614	1.50299	2.13305	2.32646	1.71367	2.20148	1.08718	2.36336	3.22654	3.19245	2.24931	3.14361	2.11928	2.03305	2.12709	2.19812	1.92929	2.03033	1.59986
45	1.97416	1.66299	1.90294	1.80447	1.50223	1.50299	2.13305	2.32646	1.71367	2.20252	1.08928	2.36242	3.24123	3.20247	2.27569	3.18274	2.20264	2.20965	2.20565	2.27374	2.06754	2.20965	1.632
45.3333	1.97011	1.66436	1.90294	1.80384	1.49843	1.50526	2.13465	2.32744	1.71633	2.202	1.09242	2.38801	3.24498	3.20489	2.26839	3.16568	2.15342	2.0867	2.1606	2.22312	1.95772	2.05414	1.62725
45.6667	1.97011	1.66299	1.90294	1.80384	1.49995	1.50147	2.13251	2.32695	1.71433	2.19992	1.08928	2.32517	3.21625	3.18135	2.24144	3.15554	2.14828	2.09726	2.17538	2.21515	1.99851	2.13228	1.59847
46	1.97358	1.6623	1.90234	1.8032	1.49919	1.50071	2.13198	2.32744	1.71633	2.20148	1.09555	2.39263	3.24703	3.2073	2.2752	3.16812	2.16927	2.08882	2.16417	2.22709	1.96336	2.06058	1.63268
46.3333	1.97242	1.66367	1.90234	1.80384	1.50375	1.50299	2.13358	2.32695	1.71766	2.20096	1.09763	2.32755	3.21934	3.18587	2.24439	3.15904	2.15291	2.10253	2.17842	2.22013	2.00513	2.15085	1.60468
46.6667	1.97589	1.66778	1.90234	1.80447	1.50071	1.5045	2.13358	2.32548	1.71566	2.20252	1.10281	2.39125	3.24703	3.21006	2.2718	3.16743	2.16672	2.08246	2.16519	2.236	1.96617	2.06219	1.632
47	1.97416	1.66436	1.90534	1.807	1.50526	1.50375	2.13358	2.32744	1.71699	2.19992	1.10281	2.36476	3.24362	3.20592	2.27666	3.18621	2.21515	2.21465	2.21814	2.28102	2.07448	2.21465	1.6428
47.3333	1.97704	1.66641	1.90414	1.80447	1.50147	1.50526	2.13518	2.32842	1.71699	2.20148	1.10385	2.39494	3.24941	3.21178	2.27811	3.17091	2.17131	2.10515	2.1708	2.23897	1.97122	2.05951	1.632
47.6667	1.97647	1.66915	1.90474	1.80573	1.50299	1.50678	2.13518	2.32793	1.71899	2.20459	1.10385	2.33608	3.22688	3.19176	2.25275	3.16812	2.17385	2.14983	2.1946	2.24045	2.02542	2.17131	1.61635
48	1.97531	1.6712	1.90474	1.80384	1.50147	1.50602	2.13358	2.32842	1.71766	2.20303	1.10488	2.39402	3.24941	3.21143	2.2752	3.17196	2.16774	2.10095	2.17436	2.23205	1.96898	2.06487	1.63335

## Sheet: Radius 30s
t (h)	Radius [mm]
2.66667
3	0.615448														0.654854
3.33333	0.710123	0.577184	0.579157			0.615448									0.850193	0.664904
3.66667	0.790702	0.646194	0.687263	0.640876		0.74156	0.682264	0.565199	0.585037	0.615448				0.619145	0.970395	0.779669	0.575824	0.589106
4	0.859825	0.716521	0.773193	0.727581	0.569222	0.845103	0.774668	0.656702	0.698786	0.714927			0.773193	0.719698	1.07521	0.884597	0.761017	0.71303	0.789529
4.33333	0.932395	0.786361	0.850486	0.813461	0.665332	0.92379	0.851826	0.74463	0.774668	0.800738			0.869064	0.800738	1.17445	0.983968	0.879585	0.831794	0.906808
4.66667	0.987078	0.839686	0.926257	0.86775	0.724438	1.0054	0.925024	0.8356	0.842399	0.880799		0.635513	0.943343	0.871685	1.25806	1.07521	0.97494	0.926104	1.00508
5	1.05523	0.91635	0.983604	0.949371	0.796453	1.08613	0.999711	0.922554	0.918837	0.964867	0.639093	0.729148	1.01556	0.946965	1.34057	1.1612	1.05968	1.02684	1.08238
5.33333	1.11106	0.955361	1.04872	0.995136	0.850486	1.16225	1.07875	1.0088	0.989387	1.03998	0.746161	0.813461	1.0945	1.01669	1.42451	1.24036	1.13813	1.11854	1.1612
5.66667	1.16323	1.01219	1.11003	1.04872	0.896208	1.24289	1.15831	1.09346	1.06492	1.11924	0.8356	0.891101	1.16225	1.09033	1.50671	1.31728	1.20694	1.20603	1.22602	0.620181
6	1.2309	1.07981	1.15536	1.11618	0.954166	1.30905	1.23645	1.17494	1.12331	1.19897	0.921317	0.960126	1.23737	1.15634	1.58674	1.38677	1.27897	1.28586	1.30039	0.682944
6.33333	1.29327	1.11822	1.21316	1.16714	1.00313	1.4049	1.3212	1.26021	1.18557	1.30818	1.01331	1.03448	1.3108	1.21033	1.67022	1.46128	1.3537	1.36831	1.36912	0.731394
6.66667	1.36703	1.17688	1.26563	1.22439	1.05631	1.46765	1.40976	1.35362	1.26111	1.36369	1.09346	1.109	1.37037	1.30031	1.75791	1.54581	1.41751	1.45369	1.43994	0.782499
7	1.4473	1.24013	1.30818	1.30556	1.109	1.54417	1.50299	1.44493	1.32723	1.44888	1.18172	1.17494	1.44335	1.37535	1.84264	1.61846	1.47707	1.55223	1.5023	0.835771
7.33333	1.4969	1.27729	1.36286	1.34601	1.15634	1.64019	1.59862	1.53677	1.38692	1.56909	1.27908	1.24472	1.52708	1.42346	1.9173	1.68865	1.5408	1.63274	1.57134	0.887092
7.66667	1.56836	1.32379	1.40652	1.40246	1.21128	1.709	1.6875	1.61425	1.45908	1.6388	1.35866	1.30731	1.58068	1.50602	1.9875	1.76419	1.59646	1.71075	1.63071	0.947342
8	1.65887	1.39594	1.44335	1.47695	1.26473	1.76095	1.7745	1.70231	1.53305	1.67461	1.42265	1.36369	1.62972	1.60361	2.06495	1.82576	1.6469	1.79586	1.6788	0.99957
8.33333	1.70298	1.42906	1.48081	1.50678	1.31427	1.82459	1.84511	1.77836	1.58932	1.74468	1.49309	1.42826	1.68953	1.66641	2.13443	1.89818	1.69192	1.86588	1.7217	1.0555
8.66667	1.77322	1.48004	1.52484	1.55007	1.3595	1.88669	1.92914	1.85436	1.64505	1.807	1.55228	1.48849	1.73747	1.73221	2.20674	1.96625	1.73895	1.9442	1.77294	1.08951
9	1.85375	1.55007	1.55375	1.63322	1.40328	1.99027	2.0108	1.92559	1.69761	1.92441	1.63462	1.5323	1.81267	1.77257	2.2816	2.02605	1.77605	2.02496	1.80873	1.14298
9.33333	1.89934	1.57345	1.59362	1.65128	1.43065	2.03	2.07503	1.99027	1.74599	1.96373	1.69492	1.57779	1.85559	1.84201	2.35596	2.10156	1.82152	2.08943	1.85221	1.18756
9.66667	1.95441	1.61707	1.63531	1.69761	1.46532	2.05292	2.14478	2.06731	1.82209	1.97126	1.74206	1.62832	1.88427	1.92973	2.4344	2.15915	1.85578	2.1571	1.89585	1.24303
10	2.03673	1.6875	1.65335	1.77129	1.51131	2.09799	2.2113	2.12715	1.86418	2.02212	1.79814	1.66915	1.92678	1.98281	2.49583	2.21224	1.88709	2.22122	1.94022	1.28328
10.3333	2.05292	1.69761	1.69358	1.77836	1.53305	2.14956	2.27939	2.19005	1.92381	2.06511	1.85682	1.71699	1.97126	2.04456	2.5601	2.25872	1.92478	2.27529	1.98583	1.32898
10.6667	2.13037	1.78732	1.72164	1.85682	1.56836	2.24916	2.34745	2.25017	1.9509	2.18013	1.93151	1.75965	2.04735	2.07722	2.62616	2.31478	1.96118	2.34231	2.02823	1.3667
11	2.14956	1.80131	1.77257	1.86295	1.58788	2.26684	2.41122	2.33282	2.03673	2.17699	1.97647	1.8327	2.07777	2.17594	2.70862	2.39504	2.01456	2.41709	2.09471	1.42296
11.3333	2.23236	1.89333	1.8177	1.96547	1.63252	2.33673	2.49631	2.41642	2.11802	2.2451	2.05403	1.89814	2.14584	2.25625	2.76235	2.43031	2.06013	2.45969	2.14012	1.45445
11.6667	2.26281	1.92381	1.8885	1.99199	1.65611	2.43898	2.55637	2.4604	2.15009	2.40031	2.11208	1.94915	2.23338	2.28439	2.7922	2.45969	2.08943	2.48206	2.17038	1.49419
12	2.37643	2.064	1.92737	2.09636	1.68953	2.40696	2.5808	2.4899	2.19889	2.31071	2.11909	1.98281	2.23695	2.36295	2.80129	2.48873	2.11048	2.51216	2.18964	1.52711
12.3333	2.31958	2.0108	1.96547	2.0838	1.70432	2.47474	2.6242	2.51996	2.20821	2.42067	2.15751	2.02155	2.30873	2.3615	2.81663	2.51128	2.11623	2.531	2.20273	1.54867
12.6667	2.36633	2.06897	1.96431	2.13785	1.72495	2.45576	2.64369	2.54205	2.24865	2.36536	2.16332	2.03673	2.29336	2.42679	2.84164	2.53972	2.12249	2.55404	2.19921	1.57415
13	2.35812	2.01647	1.97069	2.09091	1.73353	2.47888	2.67202	2.56484	2.26634	2.38601	2.18536	2.05625	2.30972	2.44645	2.86835	2.56139	2.12405	2.58031	2.1972	1.60544
13.3333	2.40031	2.06787	1.96024	2.13251	1.75641	2.5027	2.69541	2.59535	2.28289	2.41264	2.20355	2.07007	2.33576	2.47104	2.8929	2.5863	2.12613	2.60164	2.19116	1.62256
13.6667	2.39174	2.04679	1.9782	2.11802	1.75901	2.52042	2.72445	2.61506	2.30329	2.42867	2.22673	2.09473	2.35763	2.49448	2.92217	2.6135	2.12873	2.61731	2.19519	1.64286
14	2.40743	2.05791	1.98798	2.13572	1.77322	2.57638	2.74864	2.63591	2.31564	2.50179	2.26181	2.11424	2.41737	2.4821	2.94666	2.63288	2.13133	2.63204	2.20273	1.66093
14.3333	2.41878	2.07338	1.99714	2.15009	1.78028	2.56172	2.76147	2.65489	2.34307	2.47012	2.26886	2.12286	2.40601	2.53351	2.96125	2.65087	2.13547	2.64252	2.21723	1.6722
14.6667	2.45855	2.11262	2.00113	2.19109	1.79623	2.61287	2.78533	2.66946	2.35133	2.54429	2.29486	2.14691	2.45576	2.52358	2.978	2.66667	2.14167	2.65212	2.22619	1.68603
15	2.44925	2.09581	2.01816	2.17646	1.80004	2.59623	2.79065	2.68395	2.37979	2.50179	2.29535	2.16226	2.44038	2.56617	2.988	2.67784	2.15094	2.66128	2.24004	1.69844
15.3333	2.46642	2.10288	2.02719	2.19213	1.81141	2.64499	2.81264	2.69921	2.38601	2.57106	2.31761	2.1817	2.49173	2.55593	3.00276	2.69101	2.15761	2.66998	2.24743	1.70817
15.6667	2.49539	2.13251	2.03169	2.22263	1.81833	2.64671	2.81751	2.70428	2.39841	2.5675	2.32253	2.18796	2.49585	2.57239	3.01048	2.70085	2.16222	2.67866	2.25725	1.71463
16	2.48256	2.11478	2.04568	2.20821	1.82209	2.6579	2.82478	2.71312	2.40886	2.57903	2.32891	2.19889	2.51225	2.5861	3.01708	2.71106	2.16936	2.68155	2.27286	1.72683
16.3333	2.48302	2.11586	2.05347	2.20976	1.82584	2.63721	2.82842	2.7211	2.43383	2.54564	2.32744	2.20717	2.49951	2.62464	3.02878	2.72773	2.17343	2.68402	2.27043	1.72747
16.6667	2.50862	2.14372	2.0518	2.24815	1.83519	2.6848	2.83848	2.72613	2.43289	2.61025	2.34696	2.22211	2.54833	2.60369	3.03425	2.73137	2.17394	2.68608	2.27869	1.72939
17	2.49311	2.1234	2.064	2.22314	1.83145	2.67672	2.83768	2.72529	2.43804	2.59755	2.34112	2.22519	2.54698	2.62203	3.03934	2.74308	2.17191	2.69019	2.28014	1.73449
17.3333	2.51498	2.15062	2.06234	2.25473	1.83705	2.66004	2.83768	2.72864	2.45855	2.56039	2.34063	2.23082	2.529	2.64714	3.04225	2.74992	2.17648	2.6906	2.28837	1.7364
17.6667	2.49311	2.12393	2.07117	2.22724	1.83394	2.66347	2.83969	2.73115	2.46087	2.56439	2.34112	2.23644	2.53621	2.65446	3.04443	2.74791	2.18206	2.69183	2.2874	1.73958
18	2.52042	2.14956	2.06621	2.25726	1.84325	2.69794	2.84731	2.73156	2.4604	2.62464	2.35763	2.2451	2.57593	2.63461	3.04661	2.75434	2.18206	2.69266	2.29368	1.74149
18.3333	2.49996	2.12876	2.07613	2.23031	1.83643	2.66732	2.8429	2.7324	2.47104	2.5675	2.34696	2.2451	2.54833	2.66732	3.04915	2.75193	2.18358	2.69512	2.30137	1.74403
18.6667	2.52223	2.15115	2.07062	2.2608	1.84449	2.70301	2.84972	2.73699	2.46781	2.62811	2.3615	2.25321	2.58698	2.64671	3.04806	2.75394	2.17953	2.69512	2.30233	1.74403
19	2.50452	2.12662	2.07777	2.23695	1.83829	2.69414	2.84771	2.73532	2.47058	2.61287	2.35715	2.25017	2.57992	2.65446	3.00276	2.69471	2.15812	2.70167	2.37651	1.73258
19.3333	2.50407	2.12823	2.08271	2.23593	1.84201	2.69498	2.84891	2.73615	2.47243	2.61375	2.3557	2.25321	2.58478	2.65918	3.05856	2.77433	2.17953	2.69799	2.2932	1.75161
19.6667	2.52539	2.15062	2.07667	2.2613	1.8482	2.69752	2.84891	2.73824	2.47704	2.61462	2.36005	2.25372	2.58963	2.6639	3.05458	2.76195	2.178	2.69676	2.31144	1.74782
20	2.50498	2.12876	2.0849	2.23593	1.84201	2.6733	2.84771	2.74074	2.48899	2.57061	2.35473	2.25726	2.56884	2.68778	3.05241	2.76115	2.17902	2.69799	2.31335	1.74972
20.3333	2.52449	2.1538	2.08161	2.2608	1.84943	2.71102	2.85012	2.7424	2.48394	2.63418	2.36681	2.26231	2.60544	2.66818	3.0553	2.76715	2.18105	2.70085	2.32479	1.75161
20.6667	2.50771	2.13037	2.08709	2.23848	1.84325	2.70217	2.84972	2.74074	2.48486	2.61724	2.36295	2.26181	2.59711	2.67714	3.0553	2.76355	2.17648	2.70167	2.33191	1.75035
21	2.50862	2.13037	2.08654	2.24408	1.84263	2.67885	2.84771	2.74448	2.49357	2.5746	2.35908	2.26332	2.57859	2.69752	3.05422	2.76675	2.18155	2.70167	2.33759	1.75225
21.3333	2.50589	2.12983	2.09036	2.24001	1.84511	2.72152	2.85492	2.7449	2.48807	2.63764	2.37259	2.27036	2.61418	2.67757	3.05494	2.75995	2.178	2.70249	2.3338	1.75098
21.6667	2.53081	2.15433	2.08545	2.26231	1.85251	2.70597	2.85132	2.7424	2.48623	2.61898	2.3697	2.26584	2.60544	2.68438	3.05386	2.76715	2.1775	2.70249	2.34042	1.75225
22	2.50771	2.13251	2.08873	2.24256	1.84573	2.70765	2.85092	2.74157	2.48853	2.61898	2.37162	2.26735	2.6085	2.68735	3.05747	2.76595	2.178	2.70167	2.34703	1.75351
22.3333	2.53081	2.15751	2.08545	2.26382	1.85313	2.68225	2.85012	2.74448	2.49585	2.57549	2.36488	2.26986	2.5861	2.70681	3.05603	2.76075	2.1775	2.70167	2.35032	1.75161
22.6667	2.50771	2.13251	2.08982	2.24154	1.84758	2.68225	2.84771	2.74282	2.49768	2.57328	2.36729	2.27137	2.58434	2.70639	3.05711	2.76035	2.17648	2.7029	2.34891	1.75161
23	2.53306	2.15698	2.08763	2.26785	1.8519	2.71984	2.85332	2.7449	2.49082	2.63764	2.38027	2.27388	2.62159	2.6882	3.0582	2.75995	2.17902	2.70249	2.35689	1.74972
23.3333	2.50816	2.13251	2.09418	2.24306	1.84758	2.70976	2.85132	2.74032	2.49128	2.61898	2.37595	2.26886	2.61287	2.69244	3.05711	2.76115	2.17445	2.70208	2.35783	1.75351
23.6667	2.50543	2.13358	2.0969	2.24306	1.84758	2.70892	2.85012	2.74115	2.48761	2.61549	2.37691	2.26986	2.61287	2.69498	3.05747	2.75835	2.17089	2.70167	2.35689	1.75288
24	2.53216	2.15909	2.09036	2.26584	1.85436	2.70849	2.85012	2.74074	2.48899	2.61593	2.37787	2.27187	2.61506	2.69625	3.05711	2.76315	2.16987	2.70126	2.36298	1.75414
24.3333	2.50634	2.13358	2.09527	2.24357	1.84758	2.70934	2.85132	2.74032	2.4899	2.61593	2.37787	2.27137	2.61156	2.69625	3.05783	2.75755	2.1663	2.70249	2.35736	1.7554
24.6667	2.5068	2.13358	2.09581	2.24561	1.84943	2.70765	2.85172	2.73824	2.48807	2.61331	2.37691	2.27087	2.61418	2.69456	3.05928	2.76115	2.16477	2.70453	2.36158	1.75161
25	2.50725	2.13144	2.0969	2.24713	1.84943	2.70597	2.85132	2.74032	2.48715	2.6168	2.37643	2.26785	2.61331	2.69541	3.05711	2.75875	2.15812	2.70167	2.36158	1.75225
25.3333	2.50543	2.13037	2.09581	2.24662	1.84758	2.70597	2.85132	2.73866	2.48761	2.61506	2.37787	2.27137	2.61287	2.69541	3.05783	2.76035	2.15915	2.70453	2.36766	1.75225
25.6667	2.50543	2.13037	2.09745	2.2451	1.8482	2.70428	2.85012	2.73741	2.48761	2.6168	2.37739	2.26634	2.612	2.69583	3.05639	2.76035	2.15659	2.70208	2.36906	1.75225
26	2.50361	2.13144	2.09527	2.24662	1.84881	2.70554	2.85172	2.73657	2.48623	2.61506	2.37739	2.27137	2.612	2.69329	3.05349	2.75835	2.15453	2.70126	2.36345	1.75035
26.3333	2.52765	2.15486	2.08927	2.26634	1.85313	2.70132	2.85092	2.73574	2.48578	2.61375	2.37739	2.26886	2.60981	2.69329	3.05603	2.76035	2.14631	2.70249	2.36812	1.75225
26.6667	2.50498	2.12983	2.09527	2.24459	1.84758	2.67629	2.84771	2.73615	2.49173	2.57372	2.37066	2.27036	2.59007	2.71018	3.05458	2.75675	2.13909	2.70167	2.35455	1.74972
27	2.50316	2.12823	2.09418	2.24154	1.8482	2.67672	2.84691	2.73615	2.49173	2.5715	2.36922	2.26936	2.58742	2.70807	3.05277	2.75675	2.14373	2.69962	2.36298	1.75098
27.3333	2.49996	2.12501	2.0969	2.24103	1.84758	2.67373	2.84731	2.73615	2.49265	2.57106	2.36922	2.26936	2.58742	2.70976	3.0506	2.74872	2.12873	2.70126	2.37092	1.74909
27.6667	2.52042	2.15327	2.09036	2.26634	1.85436	2.70934	2.85172	2.73699	2.48486	2.63245	2.37931	2.27187	2.6168	2.68565	3.05313	2.75153	2.12561	2.70126	2.3583	1.75288
28	2.49996	2.12769	2.09473	2.24103	1.8482	2.67288	2.84691	2.73574	2.49082	2.56839	2.36826	2.26886	2.58434	2.70681	3.05241	2.75474	2.12093	2.69921	2.36672	1.75414
28.3333	2.49494	2.12823	2.09581	2.23899	1.84634	2.67288	2.84731	2.73449	2.49128	2.56884	2.36777	2.27036	2.58169	2.70512	3.05096	2.75153	2.12353	2.69881	2.35877	1.75288
28.6667	2.51906	2.15221	2.08927	2.26735	1.85436	2.67117	2.84451	2.73574	2.4899	2.57061	2.36826	2.27087	2.58124	2.70386	3.04987	2.75153	2.12509	2.70085	2.35924	1.75351
29	2.49722	2.12876	2.09853	2.23899	1.84511	2.67032	2.84531	2.73323	2.48899	2.56928	2.36777	2.26735	2.58345	2.70301	3.0506	2.74912	2.11989	2.6984	2.36298	1.75477
29.3333	2.49859	2.12769	2.09418	2.23899	1.84511	2.6716	2.8433	2.73365	2.48853	2.56706	2.36729	2.26785	2.58124	2.70259	3.05241	2.75032	2.1178	2.69921	2.35971	1.75477
29.6667	2.49814	2.12608	2.09473	2.24052	1.84573	2.6716	2.8437	2.73532	2.4899	2.56706	2.36681	2.26835	2.58036	2.70344	3.05205	2.74912	2.11623	2.70085	2.35971	1.75225
30	2.49448	2.12554	2.09364	2.23848	1.84325	2.70554	2.84851	2.73323	2.4821	2.6229	2.37835	2.27338	2.612	2.68353	3.04951	2.74872	2.11623	2.70044	2.36579	1.75035
30.3333	2.51588	2.14744	2.08709	2.26483	1.8519	2.67074	2.8429	2.73449	2.48853	2.56484	2.36585	2.26785	2.57947	2.70006	3.04915	2.74711	2.11832	2.69921	2.35736	1.75098
30.6667	2.49448	2.12769	2.09146	2.24306	1.84387	2.70807	2.84771	2.73407	2.48072	2.62116	2.37835	2.27388	2.60981	2.68395	3.0506	2.74831	2.11728	2.70167	2.36906	1.75161
31	2.49448	2.12823	2.09473	2.23797	1.8482	2.69286	2.8429	2.73073	2.47934	2.60675	2.37162	2.26835	2.59974	2.68523	3.04879	2.74509	2.12301	2.70044	2.37092	1.75035
31.3333	2.49265	2.12769	2.09146	2.24001	1.84511	2.67202	2.83929	2.73407	2.48853	2.55994	2.36826	2.26886	2.57859	2.70259	3.04661	2.74791	2.11936	2.70044	2.37185	1.75728
31.6667	2.49173	2.12501	2.09364	2.23746	1.84573	2.70386	2.84411	2.7324	2.4775	2.62072	2.37979	2.27036	2.61025	2.68353	3.04842	2.7463	2.1178	2.70208	2.37558	1.75288
32	2.48761	2.12501	2.09418	2.23338	1.84511	2.69498	2.8433	2.73031	2.47474	2.60281	2.37403	2.26634	2.59886	2.68862	3.05096	2.74952	2.11936	2.70371	2.37511	1.75098
32.3333	2.4899	2.12715	2.092	2.23593	1.84387	2.67202	2.83688	2.73198	2.4844	2.56217	2.37018	2.26483	2.57859	2.70344	3.04879	2.74791	2.11728	2.70412	2.37372	1.75351
32.6667	2.51316	2.14531	2.08818	2.26281	1.85128	2.66989	2.83406	2.73073	2.48394	2.56039	2.37259	2.26433	2.57726	2.70554	3.04588	2.74469	2.11936	2.7029	2.37325	1.75161
33	2.49082	2.12608	2.09309	2.23644	1.84511	2.70807	2.8429	2.73115	2.4752	2.61941	2.38123	2.26886	2.61025	2.68862	3.04879	2.74872	2.1178	2.70494	2.37139	1.75666
33.3333	2.48944	2.1234	2.09255	2.23389	1.84387	2.69583	2.83929	2.7278	2.47104	2.60325	2.37787	2.26382	2.5993	2.69244	3.0477	2.75153	2.12873	2.70453	2.37604	1.75414
33.6667	2.48761	2.12286	2.09255	2.23542	1.84449	2.69371	2.83969	2.72697	2.47151	2.60062	2.37883	2.26382	2.60106	2.69329	3.04879	2.74912	2.12353	2.70371	2.37558	1.7554
34	2.49036	2.12501	2.09309	2.23848	1.84325	2.66775	2.83567	2.72822	2.48256	2.56128	2.37403	2.26533	2.57992	2.7106	3.04951	2.74791	2.12717	2.70453	2.37465	1.75477
34.3333	2.4899	2.1234	2.092	2.23797	1.84201	2.70428	2.8421	2.72822	2.47243	2.62029	2.38171	2.26886	2.612	2.69414	3.04697	2.74912	2.13081	2.70698	2.37837	1.75477
34.6667	2.48578	2.12178	2.09146	2.24001	1.84511	2.66775	2.83688	2.72738	2.48164	2.55816	2.37451	2.26332	2.57726	2.71354	3.05023	2.75193	2.13495	2.7078	2.37837	1.75603
35	2.48623	2.12393	2.09091	2.23746	1.8482	2.7047	2.8421	2.72613	2.47197	2.62116	2.38362	2.26735	2.61418	2.69498	3.04915	2.74509	2.13133	2.70657	2.37883	1.7554
35.3333	2.48623	2.12286	2.09036	2.23746	1.84325	2.69329	2.83889	2.72571	2.47058	2.60237	2.37835	2.26433	2.60369	2.70006	3.05023	2.7467	2.13495	2.70739	2.3779	1.75477
35.6667	2.48164	2.12554	2.09255	2.23848	1.84449	2.66647	2.83688	2.72655	2.48118	2.56172	2.37451	2.26433	2.57947	2.71733	3.04987	2.75474	2.13754	2.7078	2.3779	1.75603
36	2.48486	2.12554	2.08873	2.24103	1.84449	2.66561	2.83728	2.72613	2.48118	2.56217	2.37499	2.26483	2.58036	2.71901	3.04915	2.7467	2.13857	2.70617	2.37976	1.75603
36.3333	2.48164	2.12178	2.09146	2.23695	1.84511	2.70301	2.8421	2.72738	2.46966	2.62377	2.38458	2.27036	2.61462	2.69752	3.05277	2.75434	2.14116	2.70617	2.37837	1.75666
36.6667	2.48532	2.1234	2.08873	2.24001	1.84449	2.69032	2.84049	2.72487	2.4692	2.60675	2.37835	2.26584	2.60325	2.70217	3.05168	2.75474	2.14373	2.7078	2.37976	1.75854
37	2.48256	2.12178	2.09255	2.23797	1.84573	2.68947	2.84009	2.72571	2.46781	2.605	2.37835	2.26483	2.60325	2.70132	3.05277	2.75675	2.14477	2.70657	2.37976	1.75917
37.3333	2.48256	2.12286	2.08873	2.23797	1.84758	2.66561	2.83808	2.72613	2.48302	2.56528	2.37259	2.26936	2.5777	2.71901	3.05349	2.75354	2.1494	2.7078	2.38162	1.75791
37.6667	2.4821	2.12286	2.08873	2.2395	1.84696	2.70386	2.84571	2.72822	2.4752	2.62681	2.38266	2.27288	2.61375	2.70217	3.05313	2.75394	2.15299	2.7078	2.37976	1.75917
38	2.48026	2.12178	2.09146	2.24205	1.84881	2.69286	2.8425	2.72697	2.47151	2.60719	2.37691	2.26986	2.6015	2.70344	3.0553	2.75193	2.15299	2.70657	2.37883	1.76043
38.3333	2.48026	2.12232	2.08927	2.2395	1.84696	2.69244	2.8429	2.72822	2.47197	2.60807	2.37787	2.26986	2.60325	2.70554	3.05567	2.76155	2.16273	2.70862	2.38162	1.75854
38.6667	2.47658	2.11855	2.092	2.24001	1.84881	2.69117	2.8417	2.72906	2.47243	2.6085	2.37739	2.27288	2.60281	2.70681	3.05386	2.75594	2.16936	2.70821	2.37744	1.75854
39	2.47842	2.11963	2.09036	2.24001	1.84881	2.66818	2.83808	2.73115	2.48669	2.56484	2.37211	2.27538	2.57903	2.72487	3.05422	2.75594	2.17292	2.70821	2.3793	1.75854
39.3333	2.47796	2.12125	2.09036	2.24154	1.8482	2.70723	2.84651	2.73156	2.4775	2.62941	2.38218	2.27889	2.61069	2.70554	3.05603	2.75634	2.17241	2.70739	2.3779	1.7598
39.6667	2.47842	2.12286	2.09036	2.24306	1.84881	2.69541	2.8429	2.73073	2.47566	2.6085	2.37739	2.27538	2.60413	2.70892	3.05422	2.75955	2.17496	2.70821	2.37837	1.76043
40	2.47934	2.11802	2.092	2.24103	1.85005	2.66775	2.84049	2.73365	2.48761	2.56617	2.37066	2.27739	2.58345	2.72822	3.0553	2.76235	2.17648	2.70902	2.3779	1.76043
40.3333	2.47888	2.12447	2.08927	2.24408	1.85313	2.70807	2.84451	2.73574	2.47704	2.63115	2.38314	2.28239	2.61506	2.71144	3.05783	2.76195	2.18105	2.70698	2.3779	1.75791
40.6667	2.47842	2.12071	2.09036	2.24154	1.85067	2.66989	2.83969	2.73282	2.48761	2.56573	2.37211	2.27789	2.58389	2.73282	3.05856	2.76035	2.18358	2.70943	2.37604	1.76043
41	2.4775	2.1234	2.092	2.24256	1.85375	2.70849	2.84531	2.73407	2.47888	2.63115	2.38506	2.28339	2.6168	2.7127	3.0582	2.76035	2.18206	2.70739	2.37837	1.7598
41.3333	2.47658	2.12125	2.09473	2.24256	1.85128	2.6716	2.83848	2.73574	2.48715	2.5675	2.37403	2.28039	2.58654	2.7349	3.05928	2.76195	2.1856	2.70821	2.37651	1.76294
41.6667	2.4775	2.1234	2.09309	2.24205	1.85251	2.70976	2.84611	2.73574	2.4798	2.63288	2.3841	2.28189	2.62072	2.71775	3.0553	2.75915	2.18611	2.70821	2.37883	1.76105
42	2.47427	2.12125	2.09473	2.24408	1.85251	2.67245	2.83929	2.73532	2.48761	2.56217	2.37739	2.28139	2.58831	2.74157	3.0553	2.75915	2.18712	2.70984	2.37697	1.76043
42.3333	2.4775	2.1234	2.09036	2.2451	1.8519	2.70976	2.84611	2.73657	2.48026	2.62855	2.38553	2.28339	2.62507	2.72152	3.05892	2.76195	2.19166	2.70821	2.37744	1.76231
42.6667	2.47658	2.12554	2.09581	2.24256	1.85498	2.67117	2.84049	2.73407	2.48761	2.5675	2.37691	2.28589	2.58875	2.74157	3.06036	2.76035	2.19267	2.70862	2.37697	1.76105
43	2.47796	2.12447	2.09255	2.24713	1.85559	2.67373	2.84049	2.7349	2.48486	2.56617	2.37691	2.28239	2.59271	2.74323	3.0582	2.76275	2.1962	2.70943	2.37837	1.76482
43.3333	2.47612	2.12823	2.09255	2.2451	1.85498	2.67117	2.84049	2.73532	2.48623	2.56573	2.37835	2.28539	2.59227	2.74739	3.05711	2.75795	2.19771	2.70943	2.37651	1.76482
43.6667	2.4775	2.12554	2.09418	2.24713	1.85682	2.7127	2.84731	2.7349	2.48164	2.62941	2.38792	2.28888	2.62681	2.73031	3.05856	2.75995	2.20122	2.70821	2.37976	1.76482
44	2.47934	2.12662	2.09418	2.24662	1.85559	2.7009	2.84411	2.73198	2.47842	2.61156	2.38266	2.28789	2.61854	2.73407	3.05928	2.75835	2.20824	2.7078	2.37558	1.76544
44.3333	2.47612	2.12715	2.09473	2.24764	1.85805	2.67245	2.8437	2.7349	2.48623	2.56973	2.38075	2.28988	2.59535	2.75112	3.0582	2.75955	2.20524	2.70821	2.37744	1.76294
44.6667	2.48026	2.12447	2.09527	2.24916	1.85805	2.67202	2.8425	2.73574	2.48853	2.56973	2.38123	2.28988	2.59491	2.7532	3.05928	2.75795	2.21074	2.70862	2.37325	1.76732
45	2.47888	2.12662	2.09636	2.24916	1.85928	2.71186	2.85012	2.73574	2.4798	2.63288	2.38745	2.29486	2.63071	2.73824	3.05892	2.76075	2.20924	2.70943	2.37651	1.76732
45.3333	2.4798	2.12608	2.09418	2.24916	1.85621	2.67458	2.84571	2.73449	2.48853	2.57194	2.38266	2.29137	2.59842	2.75361	3.05856	2.75594	2.21124	2.7078	2.37697	1.76607
45.6667	2.48026	2.13251	2.09527	2.2522	1.86112	2.67416	2.84651	2.7349	2.49036	2.5715	2.37979	2.29486	2.60018	2.75651	3.05856	2.75675	2.21524	2.7078	2.37651	1.76857
46	2.4798	2.12876	2.09799	2.24916	1.85805	2.70934	2.85252	2.73824	2.4821	2.63721	2.38984	2.29784	2.62811	2.73866	3.06072	2.75875	2.21773	2.70657	2.3793	1.76794
46.3333	2.4821	2.13518	2.09745	2.25423	1.86234	2.67586	2.84691	2.73699	2.4899	2.57505	2.38027	2.29585	2.60018	2.75692	3.06	2.76115	2.22171	2.7078	2.37744	1.76857
46.6667	2.48118	2.13465	2.09962	2.25372	1.85989	2.71312	2.85532	2.73907	2.48669	2.63764	2.39031	2.3023	2.63028	2.74199	3.05892	2.75634	2.2242	2.70821	2.37837	1.76669
47	2.48072	2.13198	2.09853	2.25119	1.86173	2.70386	2.85252	2.73699	2.48532	2.61724	2.38649	2.29784	2.61941	2.74407	3.05964	2.75675	2.23065	2.70698	2.37697	1.76607
47.3333	2.48164	2.13518	2.10071	2.25372	1.86112	2.6733	2.84932	2.73866	2.49539	2.57416	2.37931	2.3023	2.6015	2.76023	3.05603	2.75634	2.22321	2.70657	2.3779	1.76669
47.6667	2.48256	2.13625	2.10071	2.25271	1.8605	2.67501	2.85052	2.73949	2.49585	2.5746	2.37883	2.3023	2.59974	2.76147	3.06	2.76035	2.23115	2.70943	2.37604	1.76732
48	2.48623	2.13679	2.09962	2.25574	1.86112	2.71397	2.85811	2.74115	2.4899	2.64197	2.38984	2.31071	2.62985	2.74448	3.06181	2.75875	2.23313	2.70739	2.37883	1.76794

## Sheet: Radius 40s
t (h)	Radius [mm]
2.66667
3
3.33333	0.569222	0.571223	0.571223	0.658437	0.668753	0.622819	0.628291	0.642653	0.575204																		0.674804
3.66667	0.708515	0.695513	0.695513	0.770237	0.800738	0.758294	0.771716	0.790702	0.695513	0.678912	0.672156				0.594707	0.628291	0.653218										1.15548	0.728366	0.629028
4	0.813461	0.792144	0.792144	0.86775	0.91635	0.875603	0.888537	0.906335	0.797884	0.758294	0.773193	0.665332	0.573217		0.730711	0.758294	0.807831	0.668753	0.761297	0.683934	0.607988						1.34797	0.852789	0.792324	0.618396	0.74487	0.797885
4.33333	0.937277	0.862475	0.862475	0.955361	0.995136	0.968408	0.974281	0.989387	0.876905	0.846452	0.8356	0.747688	0.646194		0.843752	0.847799	0.917594	0.779073	0.872993	0.796453	0.714927	0.592786					1.49345	0.949673	0.927296	0.731394	0.897004	1.00947
4.66667	1.03338	0.937277	0.937277	1.03338	1.07664	1.05631	1.06062	1.07558	0.955361	0.925024	0.908849	0.8356	0.727581		0.948169	0.942133	1.00993	0.866434	0.957746	0.898751	0.802162	0.667045	0.573217	0.677229			1.62528	1.03648	1.02576	0.823783	1.02144	1.13034	0.585342
5	1.12433	1.01781	1.01781	1.11208	1.15831	1.14444	1.14344	1.16126	1.02785	1.00427	0.987078	0.915104	0.805002		1.04436	1.02005	1.09555	0.954166	1.04108	0.99284	0.883386	0.726012	0.656702	0.774668			1.74846	1.12249	1.11061	0.906808	1.11656	1.23232	0.679699
5.33333	1.21691	1.09137	1.09137	1.18461	1.23182	1.21972	1.22159	1.23921	1.10591	1.07875	1.05523	0.993989	0.86775	0.594707	1.13342	1.10797	1.17591	1.03559	1.11822	1.08192	0.9625	0.789258	0.743096	0.866434	0.573217		1.85876	1.20603	1.19405	0.989568	1.20327	1.32231	0.737414
5.66667	1.30381	1.16617	1.16617	1.25567	1.30818	1.28974	1.29503	1.31514	1.18075	1.15536	1.1223	1.06813	0.936059	0.660168	1.22253	1.19897	1.26111	1.1223	1.20182	1.17785	1.04218	0.849143	0.83012	0.956554	0.653218	0.620985	1.96569	1.29101	1.26768	1.06177	1.28844	1.39709	0.818399
6	1.40328	1.24381	1.24381	1.33409	1.38774	1.37369	1.37453	1.39185	1.25203	1.2309	1.18846	1.13141	1.00313	0.73227	1.30556	1.2764	1.33751	1.19611	1.28264	1.26563	1.1172	0.900019	0.902551	1.03889	0.73227	0.700417	2.05906	1.37235	1.34468	1.13813	1.36508	1.47483	0.897004
6.33333	1.50526	1.33066	1.33066	1.40896	1.4622	1.45045	1.45124	1.47308	1.32895	1.32034	1.26292	1.19992	1.06919	0.809242	1.39349	1.35614	1.41783	1.27729	1.36118	1.35698	1.19229	0.955361	0.975451	1.12939	0.800738	0.773193	2.1427	1.45217	1.41517	1.20144	1.43533	1.55081	0.962389
6.66667	1.59362	1.41542	1.41542	1.48389	1.53007	1.52484	1.54269	1.54934	1.40571	1.3992	1.33665	1.26833	1.13543	0.871685	1.48696	1.44572	1.49385	1.34939	1.44888	1.4473	1.27282	1.00427	1.05523	1.21222	0.878205	0.849143	2.23164	1.53505	1.48528	1.28156	1.50964	1.628	1.04498
7															1.5814	1.53899	1.57635	1.43065	1.53677	1.54269	1.34601	1.06492	1.12737	1.29503	0.945759	0.913857	2.32288	1.62187	1.54867	1.35288	1.58046	1.70169	1.10961
7.33333	1.779	1.55448	1.55448	1.63392	1.65542	1.67188	1.69829	1.69021	1.55668	1.55815	1.48235	1.39757	1.24747	0.99284	1.6671	1.63042	1.66093	1.50829	1.62341	1.64297	1.41542	1.11618	1.20087	1.37535	1.0234	0.985921	2.40747	1.70817	1.61778	1.4307	1.65092	1.77356	1.18756
7.66667	1.85067	1.62972	1.62972	1.70432	1.70967	1.74402	1.76806	1.75446	1.62482	1.62972	1.54491	1.45986	1.29943	1.04764	1.74533	1.71633	1.74141	1.58932	1.70298	1.73155	1.48926	1.1691	1.26923	1.45673	1.08928	1.05523	2.48962	1.79462	1.68537	1.51256	1.71463	1.84144	1.26332
8	1.92796	1.69088	1.69088	1.76871	1.7603	1.80573	1.83581	1.81833	1.69492	1.70097	1.60717	1.51131	1.33921	1.10488	1.82646	1.80447	1.82584	1.65749	1.78348	1.82146	1.55081	1.21504	1.34176	1.53825	1.15041	1.11003	2.56613	1.87651	1.74466	1.593	1.77978	1.90632	1.33147
8.33333	2.0074	1.75316	1.75316	1.8327	1.80826	1.87273	1.90054	1.87638	1.75641	1.76677	1.65887	1.56472	1.39267	1.15634	1.91132	1.88971	1.90114	1.72891	1.85559	1.90953	1.6206	1.2593	1.4049	1.61354	1.21222	1.16323	2.64378	1.95498	1.80323	1.66093	1.83362	1.96681	1.3963
8.66667	2.07503	1.80826	1.80826	1.89453	1.8519	1.93446	1.96431	1.9321	1.81456	1.81707	1.72164	1.61637	1.42105	1.2075	1.98568	1.96953	1.97993	1.79242	1.92678	1.98912	1.68005	1.30993	1.47076	1.68886	1.27282	1.21598	2.72042	2.03801	1.86588	1.72299	1.88063	2.02496	1.45749
9	2.13892	1.87334	1.87334	1.95324	1.89754	1.99942	2.02775	1.98568	1.87577	1.87577	1.78796	1.6623	1.46532	1.26202	2.05125	2.04289	2.04121	1.85866	1.99084	2.06566	1.7401	1.36202	1.52932	1.75706	1.32809	1.26833	2.79497	2.12041	1.92765	1.79093	1.93394	2.07563	1.51476
9.33333	2.20717	1.925	1.925	2.01023	1.94505	2.06731	2.09799	2.03785	1.93682	1.92973	1.84139	1.713	1.5045	1.31601	2.12017	2.12125	2.12017	1.91906	2.0518	2.14052	1.79369	1.40083	1.59577	1.82334	1.38939	1.32379	2.86411	2.19921	1.98972	1.86114	1.97746	2.11832	1.56641
9.66667	2.26634	1.97531	1.97531	2.06455	1.98855	2.12501	2.14903	2.09036	1.99084	1.99084	1.90234	1.76225	1.54195	1.36286	2.19109	2.19525	2.19317	1.9782	2.11532	2.22417	1.84758	1.44651	1.65473	1.89031	1.44651	1.37535	2.94403	2.27869	2.05422	1.93108	2.02277	2.16579	1.62187
10	2.32204	2.02155	2.02155	2.11909	2.03	2.18065	2.19889	2.13198	2.04177	2.04065	1.94915	1.80826	1.57127	1.41138	2.25423	2.26281	2.25423	2.03729	2.17384	2.29734	1.90174	1.48773	1.71766	1.95907	1.50223	1.42265	3.01781	2.35736	2.11257	1.99803	2.08572	2.20924	1.68275
10.3333	2.37835	2.06897	2.06897	2.17436	2.07117	2.23031	2.25777	2.19109	2.10179	2.092	2.00626	1.85128	1.5972	1.44809	2.31712	2.32155	2.32253	2.08873	2.2298	2.36681	1.94798	1.52409	1.76677	2.01534	1.56399	1.47618	3.09484	2.42804	2.16273	2.06013	2.1334	2.25087	1.73131
10.6667	2.45251	2.14425	2.14425	2.23287	2.12876	2.31909	2.33184	2.25574	2.17646	2.15274	2.07722	1.90474	1.64228	1.50905	2.37355	2.38218	2.38314	2.14797	2.28739	2.43664	1.99771	1.54047	1.82709	2.07613	1.61919	1.52259	3.16999	2.50996	2.21074	2.11362	2.18307	2.29705	1.77605
11	2.5186	2.20976	2.20976	2.28339	2.18953	2.38362	2.39365	2.3181	2.25423	2.2144	2.14212	1.95324	1.68141	1.55522	2.43289	2.44225	2.44692	2.2051	2.34404	2.50634	2.05013	1.56107	1.87759	2.13572	1.67665	1.56836	3.24307	2.58031	2.26751	2.16477	2.22768	2.33712	1.82939
11.3333	2.55816	2.25574	2.25574	2.32253	2.22211	2.43101	2.43054	2.35133	2.29436	2.24967	2.17751	1.98568	1.71766	1.58429	2.50589	2.52494	2.53891	2.29137	2.42396	2.58919	2.12393	1.60646	1.94622	2.22006	1.7486	1.64297	3.34011	2.67164	2.34137	2.23856	2.29849	2.39181	1.90458
11.6667	2.59183	2.29436	2.29436	2.35666	2.26029	2.46596	2.46318	2.39031	2.32106	2.28189	2.20924	2.01647	1.7401	1.60788	2.56261	2.58742	2.60413	2.34988	2.48761	2.65833	2.17961	1.64019	2.00683	2.28938	1.81078	1.69829	3.44693	2.76275	2.42758	2.31574	2.38718	2.46014	1.97242
12	2.62159	2.32842	2.32842	2.38984	2.29535	2.49539	2.49722	2.41548	2.3421	2.30725	2.24205	2.0518	1.76225	1.63392	2.60588	2.63548	2.66047	2.39651	2.53306	2.71607	2.21697	1.66024	2.05292	2.34599	1.85866	1.74075	3.50544	2.81624	2.48384	2.35783	2.43395	2.51348	2.01346
12.3333	2.6493	2.3586	2.3586	2.41784	2.3181	2.52539	2.5281	2.43945	2.37066	2.34015	2.27538	2.07062	1.77707	1.65404	2.64542	2.67032	2.69963	2.43523	2.57726	2.75692	2.2522	1.68344	2.09146	2.39794	1.89814	1.779	3.54899	2.85444	2.52488	2.38903	2.45925	2.54016	2.06227
12.6667	2.67672	2.39317	2.39317	2.44225	2.34502	2.55905	2.55905	2.46272	2.39508	2.36681	2.30032	2.09091	1.79051	1.67325	2.6716	2.70554	2.73532	2.47381	2.61462	2.80126	2.28139	1.69761	2.12876	2.43898	1.93033	1.81015	3.57042	2.88027	2.56527	2.41754	2.47537	2.57044	2.08731
13	2.69794	2.42161	2.42161	2.46272	2.36633	2.58434	2.58389	2.48164	2.41595	2.38888	2.32253	2.11424	1.8133	1.68886	2.70597	2.73782	2.77261	2.50907	2.64973	2.83969	2.31318	1.71167	2.16279	2.47934	1.96953	1.84201	3.59202	2.89787	2.59568	2.44573	2.49715	2.58843	2.10891
13.3333	2.72068	2.44459	2.44459	2.48486	2.38553	2.605	2.60413	2.50452	2.43617	2.4098	2.34356	2.13411	1.82958	1.70633	2.73574	2.76972	2.81467	2.53981	2.68395	2.87245	2.34307	1.72429	2.18692	2.52132	2.00056	1.87334	3.62296	2.92104	2.62026	2.47269	2.51699	2.61646	2.13443
13.6667	2.74407	2.46642	2.46642	2.50907	2.40649	2.63158	2.62551	2.52087	2.45715	2.42867	2.36633	2.14956	1.84696	1.72891	2.76147	2.79882	2.84491	2.56884	2.71354	2.90169	2.37018	1.74075	2.21285	2.55325	2.03281	1.90294	3.65213	2.94328	2.64545	2.50334	2.53929	2.63876	2.15505
14	2.76684	2.49173	2.49173	2.53396	2.42491	2.65059	2.64714	2.53576	2.48256	2.44412	2.38075	2.16174	1.85498	1.74272	2.78205	2.82357	2.87641	2.59974	2.7449	2.93375	2.39984	1.7486	2.23899	2.58698	2.05902	1.93151	3.68167	2.9687	2.67288	2.53319	2.56053	2.66169	2.18206
14.3333	2.78451	2.51089	2.51089	2.55369	2.44085	2.66818	2.66775	2.54967	2.49905	2.45623	2.39889	2.17751	1.87334	1.75511	2.80208	2.84851	2.90679	2.63071	2.77631	2.962	2.42585	1.75576	2.25726	2.61898	2.08818	1.95732	3.70352	2.99576	2.70085	2.55577	2.57774	2.68361	2.20072
14.6667	2.79596	2.52584	2.52584	2.56795	2.46179	2.68268	2.68438	2.56484	2.51271	2.47012	2.41689	2.19265	1.88427	1.76483	2.82357	2.86887	2.93375	2.65747	2.80452	2.98846	2.45808	1.7616	2.27939	2.64973	2.1137	1.99027	3.73295	3.01562	2.72692	2.57258	2.60036	2.70044	2.21474
15	2.80696	2.53981	2.53981	2.5777	2.47704	2.69794	2.7009	2.57638	2.52674	2.48072	2.42585	2.19992	1.90114	1.77386	2.83848	2.88354	2.96008	2.68438	2.83245	3.01393	2.48394	1.76742	2.29635	2.67885	2.13679	2.0159	3.75568	3.03607	2.75233	2.59057	2.62026	2.72286	2.23115
15.3333	2.82074	2.55191	2.55191	2.58919	2.48578	2.70934	2.71439	2.58654	2.53531	2.48944	2.43804	2.2051	1.91251	1.78028	2.85811	2.90011	2.98503	2.70301	2.85332	3.03468	2.50452	1.77129	2.3112	2.70554	2.1538	2.03953	3.78236	3.05458	2.77274	2.60248	2.63582	2.73986	2.24842
15.6667	2.82801	2.56662	2.56662	2.59974	2.49082	2.71565	2.72571	2.58919	2.54698	2.49814	2.44365	2.21337	1.92381	1.7854	2.87165	2.91855	3.00635	2.72236	2.87483	3.05379	2.52042	1.77579	2.32793	2.73198	2.17803	2.05902	3.8016	3.07046	2.79378	2.61984	2.64962	2.75795	2.26556
16	2.83929	2.5746	2.5746	2.60675	2.50179	2.72404	2.73574	2.59755	2.55414	2.50498	2.45204	2.22109	1.93151	1.79051	2.88196	2.93181	3.02338	2.73824	2.895	3.07242	2.53756	1.78156	2.33868	2.75195	2.19057	2.07667	3.81379	3.07765	2.8131	2.63582	2.66335	2.77274	2.27578
16.3333	2.8433	2.58124	2.58124	2.612	2.50953	2.7278	2.74199	2.60325	2.56039	2.50998	2.45855	2.22775	1.93858	1.79877	2.88987	2.94074	3.03956	2.75485	2.90954	3.08539	2.55726	1.78284	2.34939	2.77219	2.20407	2.09908	3.82883	3.08482	2.82447	2.64837	2.67742	2.78745	2.28305
16.6667	2.84611	2.58698	2.58698	2.61811	2.51452	2.73073	2.74573	2.60894	2.56706	2.51543	2.46087	2.23287	1.94739	1.80257	2.90129	2.94772	3.05566	2.76684	2.92167	3.09535	2.57283	1.78412	2.35521	2.7882	2.21749	2.11802	3.84007	3.09413	2.8393	2.65754	2.69142	2.80326	2.29416
17	2.85172	2.59095	2.59095	2.6229	2.51679	2.73407	2.7503	2.61375	2.57061	2.51906	2.46504	2.23644	1.94915	1.8051	2.90601	2.95352	3.0661	2.77795	2.93647	3.10382	2.58478	1.78796	2.36295	2.80208	2.22365	2.1293	3.84927	3.09912	2.85483	2.66086	2.69962	2.8182	2.30185
17.3333	2.85611	2.59886	2.59886	2.62681	2.52403	2.73782	2.7532	2.6168	2.57416	2.51996	2.47012	2.23797	1.95732	1.807	2.91189	2.96046	3.07316	2.7841	2.94578	3.113	2.59139	1.78476	2.36633	2.81751	2.23389	2.14159	3.85787	3.10375	2.86449	2.66916	2.70617	2.82916	2.30665
17.6667	2.85851	2.60193	2.60193	2.62898	2.52674	2.74074	2.75527	2.61724	2.57593	2.52087	2.47058	2.2395	1.9614	1.80763	2.91542	2.96585	3.0828	2.79392	2.95313	3.11629	2.59886	1.78668	2.37018	2.82842	2.24052	2.15115	3.86446	3.11087	2.87066	2.67453	2.71269	2.83658	2.30952
18	2.8633	2.60632	2.60632	2.63375	2.5272	2.74032	2.75817	2.62159	2.58213	2.52358	2.47381	2.2395	1.96489	1.81015	2.92206	2.96931	3.09093	2.798	2.96085	3.12288	2.60763	1.78604	2.37355	2.83848	2.24561	2.16279	3.8676	3.11335	2.8772	2.67742	2.71717	2.84397	2.3143
18.3333	2.86489	2.61025	2.61025	2.63678	2.53441	2.74323	2.76189	2.62159	2.58786	2.52313	2.47612	2.24052	1.96837	1.81078	2.92323	2.97008	3.09683	2.8037	2.96624	3.12689	2.61331	1.78732	2.37595	2.84611	2.24865	2.16859	3.87132	3.11548	2.87989	2.6832	2.72286	2.85057	2.31621
18.6667	2.8633	2.61506	2.61506	2.63505	2.54025	2.74531	2.76106	2.62159	2.58566	2.52449	2.47888	2.24561	1.97184	1.81078	2.92596	2.97239	3.10198	2.80858	2.97008	3.132	2.61506	1.78668	2.37643	2.85132	2.25372	2.17803	3.87617	3.11832	2.88679	2.68484	2.72286	2.85715	2.32193
19	2.8621	2.61724	2.61724	2.63678	2.54205	2.74573	2.76189	2.62246	2.58478	2.5272	2.47474	2.24561	1.97358	1.807	2.92596	2.97354	3.10492	2.81061	2.9743	3.13564	2.62029	1.78796	2.37979	2.8605	2.25524	2.18588	3.87902	3.11797	2.89138	2.6869	2.72692	2.86179	2.32193
19.3333	2.85931	2.62377	2.62377	2.63851	2.54877	2.74697	2.76395	2.6242	2.59623	2.52313	2.4775	2.24662	1.9874	1.80826	2.92791	2.9743	3.10823	2.81467	2.97699	3.13746	2.62159	1.78668	2.38075	2.86648	2.25928	2.18901	3.86102	3.10447	2.90663	2.70167	2.75273	2.88832	2.33759
19.6667	2.8633	2.61941	2.61941	2.6411	2.54384	2.74822	2.76354	2.62464	2.58786	2.52584	2.47658	2.24713	1.97358	1.80763	2.92908	2.97699	3.1097	2.81751	2.97852	3.14	2.62246	1.78732	2.38266	2.86887	2.26231	2.19317	3.88784	3.12823	2.89367	2.68937	2.73137	2.86372	2.32288
20	2.8625	2.62464	2.62464	2.64067	2.55012	2.75278	2.76684	2.62594	2.60018	2.51996	2.48072	2.24459	1.9897	1.80826	2.93025	2.97929	3.11006	2.81791	2.98005	3.14399	2.6242	1.78476	2.38266	2.87721	2.26835	2.19577	3.88414	3.12328	2.89863	2.69142	2.73784	2.87412	2.32859
20.3333	2.86608	2.62203	2.62203	2.63937	2.54609	2.75112	2.76601	2.6242	2.59271	2.52584	2.48118	2.2451	1.98223	1.81078	2.93064	2.97775	3.11226	2.82196	2.98273	3.14363	2.62855	1.78796	2.38218	2.88236	2.26785	2.202	3.88613	3.1254	2.9032	2.69471	2.74147	2.87989	2.32859
20.6667	2.8633	2.62681	2.62681	2.64153	2.55101	2.75195	2.76684	2.62507	2.60369	2.52223	2.48578	2.24459	1.99314	1.81078	2.93258	2.9812	3.11336	2.82155	2.98311	3.14581	2.63115	1.78859	2.38362	2.88631	2.27338	2.2051	3.88756	3.12646	2.90434	2.69553	2.74389	2.88142	2.33238
21	2.86409	2.6229	2.6229	2.63764	2.54474	2.75071	2.76972	2.6242	2.59535	2.52674	2.48118	2.2451	1.98511	1.81204	2.93181	2.98044	3.11373	2.82398	2.98426	3.14545	2.63245	1.78796	2.38506	2.89026	2.27338	2.20717	3.88869	3.12823	2.90663	2.69553	2.74469	2.88832	2.33333
21.3333	2.86489	2.62159	2.62159	2.64197	2.54564	2.75112	2.76808	2.62637	2.59623	2.52765	2.48348	2.24611	1.98453	1.81456	2.9322	2.98044	3.11556	2.82519	2.98732	3.14762	2.63158	1.78668	2.38458	2.89263	2.27589	2.21027	3.89153	3.13141	2.90929	2.70208	2.74791	2.89138	2.33664
21.6667	2.86449	2.62116	2.62116	2.63678	2.54609	2.75278	2.7689	2.6242	2.59623	2.52765	2.48302	2.24561	1.98396	1.81393	2.9322	2.98005	3.11593	2.8268	2.98885	3.14943	2.63375	1.78732	2.38506	2.89539	2.27689	2.2144	3.89097	3.13141	2.91081	2.7029	2.74711	2.89672	2.33759
22	2.8609	2.62637	2.62637	2.63505	2.55101	2.75237	2.77055	2.62507	2.605	2.5272	2.48486	2.24764	1.99885	1.81078	2.9322	2.98235	3.11666	2.8268	2.98961	3.15052	2.63288	1.78604	2.38553	2.89815	2.27839	2.2144	3.89324	3.1307	2.91194	2.70208	2.74872	2.89634	2.33806
22.3333	2.8629	2.62333	2.62333	2.63808	2.54564	2.75154	2.7689	2.6242	2.59623	2.5272	2.4844	2.24713	1.98626	1.81204	2.93142	2.98311	3.11776	2.82801	2.98923	3.15161	2.63375	1.78796	2.38697	2.90011	2.27989	2.21697	3.89437	3.13211	2.91384	2.70657	2.75113	2.89825	2.34137
22.6667	2.85891	2.62637	2.62637	2.63635	2.55101	2.75237	2.76766	2.62551	2.60413	2.52223	2.48669	2.24662	1.99771	1.81078	2.9322	2.98197	3.11739	2.82801	2.99113	3.15161	2.63505	1.78923	2.38697	2.90169	2.27889	2.21903	3.89608	3.13247	2.91536	2.70371	2.75153	2.90092	2.34184
23	2.8621	2.62246	2.62246	2.63764	2.54743	2.75112	2.76684	2.62246	2.59315	2.52584	2.48164	2.24713	1.98683	1.81141	2.93297	2.9812	3.11849	2.82963	2.99037	3.15305	2.63332	1.78987	2.3884	2.90522	2.27989	2.21852	3.89693	3.13282	2.91498	2.70617	2.75153	2.90206	2.3442
23.3333	2.8609	2.6229	2.6229	2.63721	2.54743	2.75071	2.76601	2.62203	2.59227	2.52629	2.48118	2.24662	1.98511	1.81141	2.93103	2.98311	3.11995	2.82842	2.99075	3.15197	2.63461	1.78796	2.38553	2.9064	2.27839	2.21903	3.89919	3.13176	2.91536	2.70576	2.75474	2.90701	2.34231
23.6667	2.85492	2.62637	2.62637	2.63548	2.55414	2.75195	2.76725	2.62116	2.59974	2.52087	2.48348	2.24865	1.996	1.807	2.93375	2.98158	3.11995	2.82761	2.99075	3.15161	2.63418	1.78923	2.38458	2.90601	2.27939	2.22006	3.89948	3.13247	2.91725	2.70617	2.75193	2.90396	2.34326
24	2.85611	2.6242	2.6242	2.63548	2.55503	2.75278	2.76395	2.62159	2.59886	2.51996	2.48164	2.24561	1.99428	1.80573	2.93103	2.98311	3.11849	2.82761	2.99113	3.15124	2.63505	1.78732	2.38506	2.90836	2.28039	2.22109	3.90004	3.13282	2.91763	2.70576	2.75354	2.90548	2.34184
24.3333	2.85691	2.62029	2.62029	2.63461	2.54609	2.75154	2.76312	2.61898	2.58742	2.52087	2.47888	2.24561	1.98165	1.807	2.93064	2.98044	3.11886	2.82721	2.99075	3.15088	2.63375	1.78796	2.38506	2.90954	2.28039	2.22109	3.89891	3.13141	2.91725	2.70535	2.75273	2.90663	2.34373
24.6667	2.85571	2.61985	2.61985	2.63505	2.54519	2.75237	2.76147	2.61767	2.58389	2.52042	2.47566	2.24662	1.98108	1.80637	2.93103	2.98082	3.11812	2.82559	2.9919	3.15269	2.63505	1.78796	2.38362	2.91189	2.28089	2.22314	3.90061	3.13211	2.91801	2.7029	2.75113	2.90663	2.34278
25	2.85372	2.62246	2.62246	2.63375	2.55056	2.7503	2.76312	2.61985	2.59051	2.51316	2.47566	2.24357	1.99027	1.80447	2.92869	2.98005	3.11703	2.8268	2.9919	3.15233	2.63375	1.78796	2.38458	2.9115	2.28039	2.21954	3.90146	3.13105	2.91763	2.70249	2.75233	2.90396	2.34231
25.3333	2.85172	2.62246	2.62246	2.63115	2.54788	2.7503	2.76312	2.61636	2.59051	2.5118	2.47243	2.24256	1.98912	1.80384	2.92908	2.97775	3.11776	2.82519	2.99113	3.15161	2.63245	1.78796	2.38171	2.91111	2.27889	2.22006	3.89891	3.13211	2.91687	2.70331	2.75273	2.90739	2.34326
25.6667	2.85252	2.61941	2.61941	2.62985	2.54519	2.74864	2.76395	2.61549	2.58786	2.51135	2.47243	2.24256	1.99084	1.80384	2.92752	2.97699	3.11812	2.82438	2.98999	3.1498	2.63202	1.78732	2.38171	2.91268	2.27889	2.22057	3.90004	3.1307	2.91687	2.70044	2.75113	2.90282	2.34231
26	2.85212	2.6168	2.6168	2.62898	2.54429	2.74531	2.7623	2.61375	2.58654	2.5118	2.47289	2.24154	1.98798	1.80257	2.92713	2.97737	3.11556	2.82276	2.99075	3.15124	2.63288	1.78732	2.38123	2.91307	2.27889	2.21903	3.89948	3.12717	2.91612	2.70003	2.74912	2.90206	2.33995
26.3333	2.85412	2.61593	2.61593	2.62637	2.54429	2.74573	2.76106	2.61331	2.58478	2.51044	2.47104	2.23899	1.98683	1.80067	2.92635	2.97584	3.11483	2.82115	2.98961	3.1498	2.63115	1.78476	2.38123	2.9115	2.27939	2.22057	3.89891	3.13105	2.91687	2.69594	2.75032	2.9013	2.34137
26.6667	2.85012	2.61331	2.61331	2.62681	2.54115	2.74407	2.75817	2.61331	2.58257	2.50953	2.47058	2.23848	1.98568	1.80131	2.92557	2.97622	3.11446	2.81832	2.98923	3.14907	2.62985	1.78668	2.38027	2.91307	2.27789	2.21954	3.89863	3.12823	2.91612	2.69512	2.74992	2.90054	2.33995
27	2.85012	2.61025	2.61025	2.62637	2.53981	2.74115	2.7561	2.60981	2.57903	2.50953	2.46827	2.23848	1.98511	1.80067	2.92596	2.97584	3.11263	2.81872	2.98808	3.14726	2.62941	1.7854	2.37883	2.91189	2.27739	2.21954	3.89778	3.12646	2.91725	2.69594	2.74831	2.89558	2.33995
27.3333	2.84851	2.60894	2.60894	2.62246	2.5407	2.7424	2.75485	2.6085	2.5777	2.50907	2.46827	2.23695	1.98453	1.80004	2.92323	2.97546	3.11116	2.8167	2.98732	3.14798	2.62941	1.78604	2.37979	2.91268	2.27739	2.21852	3.89976	3.12646	2.91839	2.69389	2.74791	2.8952	2.33995
27.6667	2.84851	2.60675	2.60675	2.62203	2.53801	2.74115	2.75278	2.60675	2.57903	2.50771	2.46689	2.23746	1.98281	1.80194	2.9244	2.97392	3.1108	2.81507	2.98694	3.14798	2.62768	1.78412	2.37691	2.91307	2.27689	2.22057	3.89806	3.12646	2.91763	2.69676	2.74308	2.89176	2.33995
28	2.84771	2.60675	2.60675	2.62333	2.53846	2.73866	2.74947	2.605	2.5746	2.5068	2.46596	2.23542	1.98165	1.7975	2.92206	2.97392	3.1108	2.81426	2.98655	3.14762	2.62594	1.7854	2.37547	2.91268	2.27538	2.22057	3.89749	3.12646	2.91574	2.69471	2.74308	2.89405	2.3357
28.3333	2.84611	2.60413	2.60413	2.61898	2.53621	2.7399	2.74988	2.60632	2.57061	2.50543	2.46504	2.23695	1.97877	1.79814	2.91933	2.97239	3.1086	2.81386	2.98541	3.14653	2.6242	1.78412	2.37691	2.91072	2.27488	2.21903	3.89721	3.12505	2.91612	2.69348	2.74711	2.88985	2.33712
28.6667	2.84651	2.60237	2.60237	2.61593	2.53531	2.73782	2.74864	2.60456	2.56973	2.50543	2.46133	2.23542	1.97704	1.7975	2.92011	2.97315	3.10896	2.81102	2.98503	3.14508	2.6229	1.7822	2.37259	2.91111	2.27739	2.218	3.89693	3.12505	2.9146	2.69224	2.74469	2.88793	2.33617
29	2.84611	2.60018	2.60018	2.6168	2.53035	2.73824	2.7478	2.60369	2.56884	2.50498	2.46226	2.23287	1.97589	1.7956	2.91894	2.97239	3.10786	2.81142	2.98541	3.14436	2.6229	1.78284	2.37355	2.91111	2.27639	2.21903	3.89579	3.12611	2.91574	2.69142	2.74268	2.88755	2.33617
29.3333	2.84611	2.60018	2.60018	2.61636	2.5299	2.73657	2.74697	2.60325	2.5675	2.50361	2.45901	2.23134	1.97589	1.7975	2.91776	2.97277	3.10713	2.81305	2.98158	3.14363	2.62203	1.78156	2.37162	2.91033	2.27538	2.21749	3.89636	3.12505	2.91422	2.68978	2.74227	2.8864	2.3357
29.6667	2.84531	2.59886	2.59886	2.61287	2.52945	2.73365	2.74697	2.60062	2.56706	2.5027	2.46087	2.23134	1.97473	1.79496	2.91698	2.97123	3.10639	2.80899	2.9835	3.14218	2.62029	1.78284	2.37259	2.91111	2.27388	2.21697	3.89608	3.12576	2.91346	2.68896	2.74107	2.88219	2.33286
30	2.84531	2.59755	2.59755	2.612	2.529	2.73323	2.74656	2.59974	2.56439	2.50224	2.45901	2.23338	1.97184	1.79496	2.91659	2.97047	3.10492	2.80777	2.98235	3.14291	2.62029	1.78092	2.37114	2.91033	2.27438	2.21543	3.89551	3.12646	2.90967	2.69142	2.74107	2.87989	2.33333
30.3333	2.8437	2.59579	2.59579	2.61287	2.52765	2.73156	2.74573	2.59667	2.56484	2.50042	2.45669	2.2298	1.97126	1.79496	2.91424	2.97047	3.10492	2.80736	2.98082	3.14218	2.61898	1.78092	2.37162	2.91033	2.27438	2.21697	3.89693	3.12363	2.91194	2.68855	2.73986	2.87605	2.33238
30.6667	2.8437	2.59403	2.59403	2.61287	2.52674	2.73156	2.74448	2.59711	2.56261	2.49905	2.45576	2.23236	1.96721	1.79242	2.9162	2.96931	3.10419	2.80533	2.98005	3.14182	2.61854	1.7822	2.3697	2.91033	2.27338	2.21594	3.89551	3.12399	2.9127	2.68978	2.73945	2.87758	2.33096
31	2.8437	2.59095	2.59095	2.61156	2.52313	2.73323	2.7424	2.59711	2.56217	2.49996	2.45669	2.2298	1.97184	1.79496	2.91424	2.96931	3.10456	2.80452	2.97814	3.14145	2.61724	1.78028	2.37018	2.91072	2.27237	2.21594	3.89891	3.12363	2.90853	2.68937	2.73905	2.87489	2.33096
31.3333	2.84691	2.59007	2.59007	2.61287	2.51951	2.72947	2.73824	2.59491	2.54653	2.5027	2.45344	2.22827	1.95032	1.7975	2.9115	2.96816	3.10529	2.80452	2.97814	3.14182	2.61767	1.779	2.3697	2.90954	2.27338	2.21594	3.89778	3.12222	2.90815	2.68731	2.74147	2.87258	2.33191
31.6667	2.84531	2.59447	2.59447	2.61113	2.52494	2.73156	2.74074	2.59359	2.56083	2.49905	2.45483	2.22827	1.96953	1.79432	2.91307	2.96893	3.10309	2.80533	2.97852	3.14254	2.61549	1.78028	2.37066	2.91033	2.27288	2.21543	3.90004	3.12363	2.91081	2.68731	2.74187	2.87451	2.33143
32	2.84451	2.59359	2.59359	2.61069	2.52629	2.73031	2.74157	2.59667	2.55994	2.50042	2.45483	2.22878	1.96779	1.79814	2.91228	2.96701	3.10345	2.80411	2.97699	3.14145	2.61636	1.779	2.37162	2.90954	2.27388	2.2144	3.90033	3.12611	2.91043	2.6869	2.73864	2.86912	2.32906
32.3333	2.84571	2.59227	2.59227	2.61156	2.52629	2.72989	2.7424	2.59579	2.55548	2.49905	2.4553	2.22724	1.96953	1.7956	2.90915	2.96739	3.10529	2.8033	2.97699	3.14145	2.61375	1.77964	2.37018	2.90915	2.27288	2.21543	3.90033	3.1254	2.90853	2.68814	2.73905	2.87104	2.32906
32.6667	2.85012	2.5861	2.5861	2.61025	2.51271	2.72864	2.73866	2.59359	2.54788	2.50316	2.45158	2.22622	1.9509	1.7975	2.91228	2.96662	3.10456	2.8033	2.97622	3.14218	2.61375	1.78092	2.37018	2.90836	2.27187	2.2144	3.90203	3.12505	2.90967	2.68814	2.73986	2.87027	2.33096
33	2.84611	2.58742	2.58742	2.60981	2.52223	2.73156	2.74157	2.59535	2.55771	2.49996	2.45808	2.22878	1.96779	1.79687	2.91111	2.96585	3.10272	2.80248	2.97622	3.14145	2.61375	1.77772	2.3697	2.90797	2.27388	2.21388	3.90288	3.12576	2.90777	2.68896	2.73945	2.87027	2.32906
33.3333	2.84651	2.58963	2.58963	2.60894	2.52403	2.73031	2.7399	2.59447	2.55726	2.50224	2.45576	2.22827	1.96721	1.7975	2.90954	2.96624	3.10272	2.80045	2.97661	3.14145	2.61375	1.77964	2.36874	2.90876	2.27036	2.2144	3.90373	3.12576	2.91005	2.68855	2.73905	2.86989	2.32859
33.6667	2.84891	2.58875	2.58875	2.60588	2.52403	2.73073	2.74074	2.59447	2.55325	2.49996	2.45344	2.22775	1.96721	1.79687	2.90915	2.96354	3.10161	2.80248	2.97584	3.14145	2.61375	1.779	2.36922	2.90954	2.27187	2.21594	3.90514	3.12682	2.91081	2.68649	2.73905	2.86565	2.32764
34	2.85012	2.58786	2.58786	2.60719	2.52358	2.7324	2.74157	2.59359	2.55682	2.50133	2.45483	2.22827	1.96605	1.80067	2.90915	2.96547	3.10198	2.80289	2.97584	3.14073	2.61331	1.77964	2.36826	2.90954	2.27438	2.21388	3.90599	3.12823	2.90929	2.68855	2.73986	2.86796	2.32716
34.3333	2.84972	2.5861	2.5861	2.60807	2.52494	2.73031	2.74115	2.59491	2.55459	2.50452	2.45344	2.22775	1.96837	1.80004	2.90836	2.96508	3.10088	2.80167	2.97661	3.14327	2.61244	1.77964	2.36826	2.90876	2.27237	2.21543	3.90486	3.12682	2.91043	2.68608	2.74026	2.86642	2.32716
34.6667	2.85212	2.58434	2.58434	2.60588	2.51407	2.72989	2.73782	2.59095	2.54653	2.50589	2.45297	2.22775	1.94739	1.80194	2.90876	2.96431	3.10125	2.80208	2.97546	3.14036	2.61156	1.77836	2.36826	2.90954	2.27187	2.21543	3.90684	3.12646	2.91081	2.68978	2.74066	2.86835	2.32764
35	2.84891	2.5861	2.5861	2.60719	2.52629	2.73365	2.73949	2.59315	2.55548	2.50498	2.45251	2.2298	1.96663	1.79877	2.90797	2.9647	3.10345	2.80248	2.97622	3.14036	2.61156	1.779	2.36922	2.91072	2.27036	2.21491	3.9108	3.12823	2.91005	2.6869	2.73986	2.86796	2.32811
35.3333	2.85092	2.58434	2.58434	2.60369	2.52358	2.7324	2.73907	2.59271	2.55637	2.50361	2.4539	2.23185	1.96663	1.80067	2.90719	2.96624	3.10235	2.80289	2.97546	3.14073	2.61069	1.77836	2.36826	2.91111	2.27237	2.21646	3.90854	3.12788	2.91043	2.68649	2.73945	2.86488	2.32859
35.6667	2.85012	2.58478	2.58478	2.60632	2.52449	2.73198	2.73907	2.59403	2.55771	2.5068	2.45576	2.23134	1.96373	1.80067	2.90915	2.96431	3.10309	2.80045	2.97584	3.14254	2.61244	1.78028	2.36681	2.91228	2.27137	2.21697	3.90854	3.12964	2.91005	2.68731	2.74026	2.86873	2.32764
36	2.85132	2.58345	2.58345	2.60632	2.51271	2.73073	2.73866	2.59227	2.5416	2.50862	2.45158	2.22827	1.94915	1.80131	2.90836	2.96508	3.10198	2.80289	2.97507	3.14073	2.61156	1.77643	2.36922	2.91268	2.27187	2.21749	3.91023	3.13	2.91194	2.68855	2.74026	2.86565	2.32859
36.3333	2.85012	2.58654	2.58654	2.60544	2.52403	2.73198	2.73949	2.59447	2.55146	2.50907	2.45715	2.23134	1.96721	1.8032	2.91189	2.96585	3.10345	2.8037	2.97584	3.14	2.612	1.779	2.36826	2.91542	2.27087	2.21749	3.91165	3.13	2.91043	2.68567	2.74268	2.86758	2.32954
36.6667	2.85092	2.58786	2.58786	2.60544	2.52494	2.7324	2.73866	2.59359	2.55325	2.50634	2.45437	2.23134	1.96663	1.80131	2.90915	2.96431	3.10272	2.80411	2.97507	3.14182	2.60938	1.78028	2.3697	2.91503	2.27187	2.22006	3.91447	3.13599	2.91346	2.68855	2.74066	2.86758	2.33049
37	2.85212	2.5861	2.5861	2.60719	2.5272	2.73115	2.73949	2.59271	2.55771	2.50589	2.4539	2.23338	1.96953	1.80194	2.91111	2.96585	3.10272	2.80248	2.97546	3.14218	2.60981	1.78092	2.37018	2.91542	2.27036	2.218	3.91306	3.13388	2.9165	2.68978	2.74107	2.86873	2.32764
37.3333	2.85252	2.58742	2.58742	2.60719	2.52674	2.73198	2.73907	2.59271	2.55637	2.50452	2.4553	2.2344	1.96837	1.8051	2.9115	2.96585	3.10382	2.8037	2.9743	3.14327	2.61156	1.779	2.36874	2.91776	2.27488	2.22006	3.91504	3.13388	2.91422	2.68896	2.74187	2.87528	2.32764
37.6667	2.85532	2.59007	2.59007	2.60632	2.52765	2.72947	2.73782	2.59315	2.56083	2.50907	2.4553	2.23236	1.96779	1.80637	2.91111	2.9647	3.10382	2.8033	2.97469	3.14327	2.60938	1.779	2.36874	2.91698	2.27237	2.21903	3.91729	3.13564	2.91498	2.68937	2.74227	2.86873	2.33096
38	2.85212	2.58919	2.58919	2.60894	2.5281	2.72947	2.73782	2.59007	2.55548	2.50725	2.4553	2.23287	1.96779	1.80384	2.91228	2.96431	3.10309	2.8033	2.97469	3.14363	2.6085	1.77964	2.36777	2.91815	2.27237	2.22109	3.91673	3.13529	2.91498	2.68855	2.74348	2.86989	2.32954
38.3333	2.85452	2.58434	2.58434	2.60763	2.52132	2.73115	2.73407	2.58963	2.54564	2.51452	2.4553	2.23338	1.9509	1.80573	2.90954	2.96431	3.10382	2.80452	2.97584	3.14399	2.61069	1.78028	2.36826	2.91815	2.27288	2.22211	3.91786	3.13705	2.91498	2.69183	2.74509	2.87027	2.33049
38.6667	2.85412	2.58963	2.58963	2.60763	2.52855	2.73407	2.73699	2.59227	2.55949	2.51044	2.45762	2.23491	1.97069	1.80447	2.91268	2.96393	3.10456	2.8037	2.97469	3.14581	2.60894	1.78028	2.37066	2.91737	2.27538	2.2216	3.91899	3.13811	2.91498	2.6906	2.74429	2.8722	2.33143
39	2.85492	2.59183	2.59183	2.61069	2.529	2.73282	2.73699	2.59535	2.55682	2.51407	2.45762	2.23287	1.96895	1.80826	2.9115	2.96585	3.10419	2.80411	2.97469	3.14545	2.61025	1.78028	2.36826	2.91737	2.27187	2.22314	3.9187	3.13951	2.91725	2.69224	2.74268	2.87027	2.33143
39.3333	2.85492	2.59095	2.59095	2.60894	2.53126	2.73282	2.73699	2.59623	2.5586	2.51225	2.45669	2.2344	1.96721	1.80447	2.91424	2.96585	3.10492	2.80492	2.97546	3.14653	2.61025	1.78348	2.3697	2.91776	2.27237	2.22365	3.91955	3.13881	2.91839	2.69266	2.74429	2.86989	2.33096
39.6667	2.85571	2.59227	2.59227	2.61069	2.53171	2.73365	2.73657	2.59271	2.5586	2.50862	2.45437	2.23644	1.96721	1.81078	2.91503	2.9647	3.10492	2.80492	2.97546	3.14871	2.61156	1.78156	2.36922	2.92011	2.27388	2.22365	3.92209	3.14092	2.91801	2.69183	2.7467	2.87143	2.33191
40	2.85691	2.59007	2.59007	2.612	2.53306	2.7349	2.73699	2.59535	2.55726	2.51271	2.45483	2.23338	1.97126	1.80952	2.91542	2.96585	3.10419	2.80452	2.97546	3.14762	2.61025	1.78156	2.36922	2.9205	2.27589	2.22468	3.92068	3.14303	2.91877	2.69266	2.74711	2.87297	2.32954
40.3333	2.85771	2.59095	2.59095	2.61025	2.53261	2.73449	2.73782	2.59579	2.55905	2.51316	2.45623	2.23746	1.97011	1.81015	2.91542	2.96624	3.10382	2.80492	2.97699	3.14871	2.61113	1.78156	2.37162	2.92167	2.27589	2.2257	3.92265	3.14374	2.91877	2.69183	2.7459	2.87681	2.33286
40.6667	2.85771	2.59535	2.59535	2.61025	2.53306	2.73574	2.73907	2.59711	2.56172	2.51362	2.4553	2.23593	1.97184	1.81141	2.91542	2.96508	3.10566	2.80655	2.97622	3.15016	2.61113	1.78348	2.37259	2.92362	2.27438	2.2257	3.92378	3.14585	2.91763	2.69266	2.7467	2.87528	2.33049
41	2.85811	2.59623	2.59623	2.61069	2.53351	2.73782	2.73824	2.59623	2.56039	2.51498	2.45623	2.23695	1.97184	1.81267	2.91542	2.96547	3.10603	2.80614	2.97699	3.14943	2.61025	1.78284	2.37066	2.9244	2.27538	2.2257	3.9249	3.15006	2.9199	2.69101	2.74791	2.87297	2.32954
41.3333	2.86011	2.59491	2.59491	2.61025	2.53396	2.73657	2.74074	2.59667	2.56217	2.5177	2.45669	2.23542	1.97242	1.81204	2.91385	2.96547	3.10419	2.80614	2.97699	3.15161	2.612	1.78092	2.37018	2.92713	2.27589	2.22878	3.92519	3.14795	2.9199	2.6984	2.74711	2.87451	2.33143
41.6667	2.85971	2.59623	2.59623	2.61113	2.53486	2.73782	2.74157	2.59623	2.55994	2.51724	2.45808	2.23797	1.97242	1.81581	2.91659	2.96508	3.10749	2.80696	2.97737	3.15233	2.612	1.7854	2.37211	2.92635	2.27538	2.22775	3.92519	3.1483	2.91839	2.69635	2.75073	2.87797	2.33475
42	2.8605	2.59667	2.59667	2.61069	2.53396	2.73866	2.7399	2.59667	2.56039	2.51679	2.45855	2.23542	1.97531	1.81644	2.91463	2.96778	3.10676	2.80614	2.97967	3.15342	2.612	1.78284	2.37066	2.92635	2.27639	2.22878	3.92575	3.14655	2.92255	2.69635	2.74872	2.87566	2.33238
42.3333	2.8617	2.59711	2.59711	2.61113	2.53756	2.74032	2.74032	2.59623	2.56039	2.52042	2.45669	2.23797	1.97589	1.81958	2.91659	2.96701	3.10786	2.80655	2.97814	3.15305	2.61287	1.78412	2.37211	2.93064	2.27538	2.2298	3.92716	3.15216	2.92028	2.69799	2.74831	2.87797	2.33286
42.6667	2.86369	2.60237	2.60237	2.60938	2.53801	2.73949	2.74157	2.59711	2.55949	2.52087	2.45901	2.23797	1.97358	1.81958	2.91581	2.96662	3.10896	2.80777	2.9789	3.15559	2.61287	1.7822	2.37211	2.93258	2.27739	2.23134	3.928	3.14936	2.92331	2.69799	2.75273	2.88334	2.33143
43	2.8617	2.59886	2.59886	2.61069	2.53666	2.74074	2.74199	2.59667	2.56439	2.52494	2.45901	2.24256	1.97589	1.81958	2.91815	2.96816	3.10786	2.80614	2.9812	3.15486	2.61375	1.78348	2.37307	2.93492	2.27639	2.2298	3.92913	3.14971	2.92104	2.69758	2.75193	2.88219	2.33143
43.3333	2.86369	2.60193	2.60193	2.60981	2.53621	2.74157	2.74199	2.59711	2.56083	2.52223	2.45855	2.2395	1.973	1.82209	2.91972	2.96624	3.1086	2.80858	2.9812	3.15378	2.61506	1.78412	2.37211	2.93414	2.27689	2.23287	3.92997	3.15357	2.92444	2.70044	2.75193	2.88564	2.33428
43.6667	2.86409	2.60281	2.60281	2.61025	2.53801	2.74199	2.74157	2.59798	2.56395	2.52403	2.45947	2.2395	1.97589	1.82146	2.91894	2.96778	3.10896	2.80655	2.98044	3.15559	2.61462	1.78412	2.37211	2.93725	2.27839	2.23287	3.93138	3.15286	2.92255	2.69921	2.75032	2.88142	2.33238
44	2.8625	2.60456	2.60456	2.61069	2.53666	2.74157	2.74323	2.5993	2.5635	2.52403	2.4604	2.24205	1.97877	1.82209	2.91933	2.96855	3.1097	2.80655	2.98044	3.15631	2.61506	1.78476	2.37403	2.93841	2.27689	2.23338	3.9325	3.15392	2.92369	2.70126	2.75314	2.8864	2.3357
44.3333	2.86568	2.60807	2.60807	2.61156	2.53891	2.73866	2.74199	2.59711	2.56617	2.52539	2.45947	2.24408	1.97762	1.82209	2.92167	2.97008	3.10823	2.80777	2.98235	3.15667	2.61331	1.7822	2.37259	2.94074	2.28039	2.23542	3.9339	3.15321	2.92444	2.70085	2.75273	2.88832	2.3338
44.6667	2.86409	2.60807	2.60807	2.61113	2.54025	2.74074	2.74282	2.59579	2.56484	2.52539	2.45994	2.24408	1.97935	1.82271	2.92245	2.96931	3.1097	2.80777	2.98311	3.15739	2.61506	1.78348	2.37355	2.94074	2.27939	2.23593	3.93166	3.15672	2.92558	2.70167	2.75314	2.89023	2.33522
45	2.86608	2.60938	2.60938	2.61113	2.5425	2.73907	2.74115	2.59491	2.56395	2.52494	2.45947	2.24459	1.97877	1.82271	2.92206	2.97123	3.11043	2.80655	2.9812	3.15992	2.61549	1.78348	2.37259	2.94423	2.27989	2.23746	3.9339	3.15321	2.92709	2.70208	2.75193	2.88832	2.33617
45.3333	2.86529	2.612	2.612	2.61113	2.5434	2.73907	2.7424	2.59711	2.56973	2.52403	2.45947	2.24357	1.97762	1.82146	2.92245	2.972	3.1108	2.80736	2.98235	3.15992	2.61593	1.78412	2.37499	2.94656	2.27939	2.23644	3.93503	3.15532	2.92558	2.70249	2.75434	2.88946	2.33617
45.6667	2.86449	2.61287	2.61287	2.61506	2.5416	2.74115	2.74323	2.59755	2.56884	2.52674	2.45947	2.24561	1.97762	1.82271	2.92284	2.97162	3.11153	2.80818	2.98426	3.15956	2.61549	1.78412	2.37259	2.94849	2.28039	2.23644	3.93756	3.15707	2.92633	2.70331	2.75474	2.8929	2.33712
46	2.86568	2.61375	2.61375	2.61375	2.54205	2.74115	2.74115	2.59798	2.56617	2.52403	2.45855	2.24967	1.97647	1.82396	2.92284	2.97162	3.1119	2.8098	2.9835	3.16028	2.6168	1.7854	2.37739	2.94965	2.27939	2.23848	3.93812	3.15882	2.92633	2.70453	2.75434	2.89481	2.3357
46.3333	2.86449	2.61636	2.61636	2.61331	2.5416	2.74407	2.74157	2.59842	2.56928	2.5272	2.45762	2.24611	1.97647	1.82083	2.92245	2.97239	3.1119	2.80899	2.98426	3.16209	2.61636	1.78604	2.37595	2.95043	2.28039	2.23899	3.94008	3.15812	2.92709	2.70331	2.75434	2.88793	2.33901
46.6667	2.8633	2.61767	2.61767	2.61418	2.54519	2.74448	2.73907	2.5993	2.57106	2.52674	2.45855	2.24815	1.9782	1.82146	2.92401	2.9743	3.11116	2.80858	2.98541	3.16136	2.61724	1.78604	2.37643	2.95159	2.28139	2.23797	3.94064	3.15987	2.92746	2.70494	2.75594	2.89252	2.33617
47	2.86529	2.61767	2.61767	2.61462	2.54743	2.74448	2.73907	2.59886	2.57239	2.52765	2.45855	2.24713	1.97647	1.82209	2.92362	2.97239	3.11116	2.81021	2.98464	3.16317	2.61811	1.78796	2.37547	2.95275	2.28089	2.24001	3.94064	3.15882	2.92746	2.70371	2.75554	2.89596	2.33901
47.3333	2.86807	2.61941	2.61941	2.61724	2.54609	2.7449	2.73907	2.59886	2.5715	2.5272	2.45762	2.24561	1.97416	1.82209	2.92323	2.97354	3.113	2.81021	2.98464	3.16389	2.61985	1.78476	2.37691	2.95506	2.28189	2.24052	3.94148	3.16336	2.92633	2.70657	2.75514	2.90054	2.33664
47.6667	2.86568	2.62072	2.62072	2.61767	2.54698	2.74614	2.7424	2.5993	2.57283	2.5281	2.45901	2.24865	1.9805	1.82271	2.9244	2.97392	3.1119	2.8098	2.98579	3.16425	2.61767	1.7854	2.37739	2.95776	2.28189	2.24001	3.94148	3.15987	2.93086	2.70453	2.75835	2.89825	2.33712
48	2.86807	2.61898	2.61898	2.6168	2.54788	2.7478	2.74282	2.60018	2.57328	2.529	2.45808	2.24713	1.9782	1.82459	2.92479	2.9743	3.113	2.81102	2.98694	3.16569	2.61811	1.78796	2.37691	2.95584	2.28389	2.24001	3.9426	3.16197	2.92935	2.70984	2.75634	2.89863	2.33948

## Sheet: Radius 50s
t (h)	Radius [mm]
2.66667
3	0.588924
3.33333	0.771716	0.675542	0.764289	0.693871	0.598532	0.607988	0.624648	0.581123											0.6797	0.637753	0.585342	0.732904
3.66667	0.880799	0.779073	0.86775	0.805002	0.722862	0.74156	0.749213	0.74463	0.665332		0.729148								0.870745	0.833122	0.812979	0.930865	0.618396	0.636018	0.743385	0.56419	0.756648	0.895771
4	0.969586	0.866434	0.957746	0.89748	0.809242	0.8356	0.838326	0.841043	0.761297	0.663615	0.86775	0.758294	0.790702	0.733827	0.644426				1.01819	0.970395	0.953158	1.05341	0.781085	0.818399	0.870745	0.706802	0.900693	1.03648	0.702096	0.948508
4.33333	1.05198	0.955361	1.04436	0.980118	0.888537	0.915104	0.92379	0.927488	0.841043	0.755279	0.964867	0.88982	0.925024	0.853165	0.809242	0.592786	0.620985		1.18663	1.08544	1.06488	1.15452	0.880841	0.935603	0.971533	0.822441	1.03221	1.14491	0.864375	1.09457
4.66667	1.14544	1.03779	1.12635	1.06062	0.964867	0.996282	1.00199	1.00313	0.918837	0.838326	1.05739	0.977788	1.02005	0.945759	0.926257	0.692225	0.729148	0.626472	1.30379	1.19867	1.14684	1.25366	0.970395	1.02899	1.06281	0.903144	1.11557	1.22962	0.97267	1.20327
5	1.22346	1.11208	1.21222	1.13844	1.03559	1.07239	1.07664	1.07558	1.00199	0.92379	1.12939	1.06062	1.10797	1.03006	1.01669	0.774668	0.821833	0.711728	1.40891	1.285	1.2206	1.32398	1.05236	1.11359	1.1391	0.976073	1.17727	1.31728	1.06799	1.28156
5.33333	1.29855	1.19037	1.27819	1.20939	1.11516	1.13945	1.14643	1.14643	1.07875	1.00085	1.2075	1.14145	1.19133	1.11516	1.10281	0.853165	0.908849	0.793582	1.50304	1.37476	1.27897	1.3963	1.12642	1.18849	1.19775	1.05131	1.22782	1.39313	1.14298	1.35043
5.66667	1.37535	1.26473	1.35698	1.28797	1.18941	1.20939	1.21598	1.2141	1.15041	1.07026	1.29679	1.21033	1.27729	1.1942	1.18268	0.926257	0.995136	0.870375	1.58952	1.45825	1.34551	1.46957	1.20694	1.25806	1.26507	1.12544	1.29187	1.47483	1.2206	1.4214	0.575824
6	1.45438	1.35362	1.44256	1.36536	1.26473	1.28531	1.28974	1.27997	1.2309	1.15239	1.37701	1.28264	1.35108	1.26833	1.25658	1.00085	1.0777	0.944552	1.66558	1.54438	1.41517	1.54008	1.27637	1.32731	1.33479	1.19775	1.35451	1.5451	1.29015	1.48974	0.644648
6.33333	1.53007	1.43145	1.52185	1.44493	1.33921	1.36536	1.36536	1.34686	1.30556	1.22346	1.46064	1.36118	1.42826	1.34431	1.33152	1.07875	1.15437	1.01219	1.73895	1.62596	1.48603	1.61025	1.34222	1.39709	1.39867	1.26768	1.40262	1.61436	1.36021	1.5501	0.69577
6.66667											1.55081	1.43702	1.50602	1.41461	1.40652	1.15338	1.24381	1.08087	1.80812	1.70817	1.55295	1.68406	1.39788	1.46731	1.4643	1.34715	1.47483	1.68603	1.42296	1.61299	0.758107
7	1.67529	1.57635	1.67665	1.59791	1.47076	1.51056	1.5045	1.48773	1.45045	1.35698	1.64505	1.51959	1.59219	1.49843	1.48466	1.23367	1.32206	1.14544	1.88474	1.78598	1.62051	1.74972	1.47108	1.52856	1.52928	1.41282	1.53865	1.75603	1.4823	1.68077	0.818399
7.33333	1.74925	1.65197	1.7401	1.66641	1.53899	1.57707	1.57417	1.55961	1.51584	1.42265	1.72957	1.60076	1.68005	1.57924	1.55888	1.30731	1.40083	1.21504	1.95441	1.87416	1.69322	1.81423	1.54152	1.60199	1.59091	1.48826	1.61299	1.82697	1.54295	1.74085	0.879585
7.66667	1.81644	1.72363	1.8051	1.73747	1.59577	1.64019	1.64019	1.62482	1.57635	1.48158	1.81519	1.67801	1.76289	1.65404	1.62622	1.39021	1.47463	1.29151	2.0184	1.95328	1.76356	1.88415	1.61025	1.67352	1.65893	1.5657	1.67682	1.89235	1.60337	1.80323	0.940316
8	1.87759	1.78412	1.86479	1.80067	1.65335	1.70097	1.69627	1.69156	1.64505	1.53751	1.89092	1.75121	1.84263	1.72957	1.69963	1.46064	1.54786	1.36369	2.07988	2.03095	1.82273	1.95045	1.67485	1.73704	1.72106	1.63815	1.73831	1.96006	1.65827	1.87121	1.00288
8.33333	1.93564	1.85005	1.925	1.85989	1.711	1.76354	1.75576	1.7616	1.70499	1.60148	1.96314	1.82584	1.92144	1.80004	1.77515	1.53751	1.62271	1.43543	2.1458	2.09682	1.88826	2.01017	1.74529	1.79647	1.77792	1.70558	1.80384	2.02441	1.71592	1.92707	1.05759
8.66667	1.99199	1.9149	1.9805	1.92203	1.76354	1.81644	1.81393	1.82896	1.76419	1.65335	2.03617	1.89814	1.99942	1.86785	1.84139	1.60929	1.68886	1.49919	2.20273	2.16987	1.94761	2.07669	1.81483	1.86529	1.83783	1.77418	1.85995	2.08042	1.76482	1.98081	1.10961
9	2.05125	1.9782	2.04065	1.9805	1.81707	1.87029	1.86601	1.89393	1.82271	1.71234	2.10342	1.96373	2.07722	1.9321	1.90654	1.68073	1.75055	1.56764	2.2548	2.23708	2.01181	2.13184	1.87651	1.9196	1.90399	1.83843	1.92822	2.13288	1.82213	2.03421	1.17163
9.33333	2.10179	2.03897	2.09146	2.04958	1.86907	1.9143	1.92678	1.95558	1.88366	1.76548	2.17069	2.02381	2.14956	1.996	1.97126	1.74075	1.8133	1.63252	2.30809	2.30137	2.0735	2.18863	1.9368	1.97578	1.96625	1.91153	1.9875	2.19569	1.87061	2.07882	1.22331
9.66667	2.15645	2.09473	2.15009	2.10776	1.92085	1.96547	1.97242	2.0108	1.94035	1.81707	2.22827	2.08161	2.22365	2.06068	2.02831	1.81015	1.86968	1.69761	2.36017	2.36485	2.12717	2.23412	2.00024	2.02714	2.0184	1.9769	2.03584	2.24891	1.9173	2.12197	1.27377
10	2.20355	2.15009	2.19785	2.16701	1.97126	2.00683	2.02831	2.07503	1.99542	1.86662	2.29486	2.14265	2.29535	2.12393	2.09091	1.87151	1.92796	1.77064	2.40563	2.418	2.17241	2.28692	2.04937	2.07136	2.07403	2.03801	2.0836	2.31048	1.96569	2.16783	1.32147
10.3333	2.25524	2.20562	2.24713	2.22263	2.02268	2.05736	2.07887	2.1309	2.05458	1.91549	2.35666	2.19733	2.36005	2.18379	2.14425	1.92855	1.98281	1.83394	2.44934	2.47448	2.2242	2.33853	2.10261	2.12249	2.12977	2.09577	2.13236	2.36251	2.01456	2.20373	1.3667
10.6667	2.31564	2.26936	2.31416	2.28888	2.08927	2.11208	2.14372	2.19733	2.12447	1.98165	2.4098	2.24662	2.42914	2.24561	2.20096	1.9897	2.03225	1.89212	2.49583	2.52838	2.27626	2.38162	2.15505	2.16783	2.17547	2.15453	2.17597	2.4148	2.0687	2.2435	1.40025
11	2.37307	2.35376	2.39508	2.36102	2.16385	2.18692	2.21543	2.27388	2.19473	2.04568	2.46827	2.29635	2.49036	2.30626	2.25321	2.04009	2.08216	1.95558	2.5358	2.5833	2.31621	2.4212	2.21024	2.22022	2.22817	2.20373	2.2237	2.46508	2.10576	2.28257	1.45141
11.3333	2.41359	2.41548	2.44645	2.41831	2.21543	2.23542	2.26533	2.33282	2.25372	2.10125	2.53216	2.3455	2.55369	2.36922	2.31663	2.09636	2.14052	2.02212	2.58288	2.63624	2.36017	2.46508	2.26409	2.26946	2.28257	2.25969	2.26897	2.51436	2.14528	2.32003	1.49862
11.6667	2.45669	2.46179	2.49357	2.46133	2.25979	2.28339	2.31515	2.37403	2.30032	2.13892	2.59842	2.41264	2.62898	2.44132	2.38027	2.15698	2.19992	2.09799	2.62784	2.69183	2.40425	2.51699	2.31526	2.32859	2.34703	2.32954	2.33001	2.56915	2.19217	2.36392	1.55579
12	2.49173	2.50862	2.53306	2.50498	2.29833	2.3186	2.34988	2.41689	2.3382	2.17279	2.66176	2.47104	2.69583	2.50498	2.44505	2.22263	2.25625	2.15962	2.67908	2.75715	2.46149	2.56829	2.38023	2.38764	2.4093	2.39504	2.39412	2.64336	2.24989	2.4212	1.61025
12.3333	2.52313	2.54877	2.57017	2.53711	2.34356	2.35473	2.39031	2.45715	2.37643	2.20459	2.71607	2.52132	2.75444	2.56528	2.49722	2.27187	2.30379	2.21697	2.74107	2.84203	2.52751	2.64085	2.46508	2.47046	2.48606	2.47537	2.47626	2.72408	2.31526	2.49627	1.69061
12.6667	2.55325	2.58478	2.61113	2.57947	2.37979	2.37979	2.41925	2.48578	2.41595	2.23644	2.75775	2.56395	2.80452	2.61287	2.54474	2.31761	2.35376	2.27036	2.80602	2.91119	2.59398	2.69101	2.52969	2.54581	2.55145	2.55361	2.54798	2.80089	2.39042	2.55621	1.72811
13	2.5808	2.6229	2.63894	2.60763	2.41359	2.41122	2.45204	2.51498	2.44878	2.26382	2.79922	2.60106	2.84651	2.66176	2.58257	2.36392	2.3884	2.31663	2.84319	2.96088	2.63246	2.72692	2.58373	2.59185	2.5944	2.59483	2.57387	2.84824	2.43758	2.60164	1.74466
13.3333	2.60106	2.65575	2.66861	2.63808	2.44132	2.43991	2.4821	2.5425	2.47474	2.29187	2.8413	2.63678	2.88908	2.70765	2.61985	2.40127	2.42867	2.36729	2.87066	3.00534	2.65837	2.75594	2.61942	2.627	2.63036	2.62363	2.58715	2.88946	2.4776	2.64252	1.77231
13.6667	2.62072	2.69117	2.68778	2.66647	2.4692	2.46411	2.51316	2.57194	2.50316	2.31958	2.87562	2.67245	2.9283	2.74448	2.65575	2.44085	2.46272	2.40743	2.89863	3.03461	2.68567	2.78546	2.65629	2.66128	2.66128	2.64001	2.61012	2.92444	2.50687	2.67329	1.7977
14	2.64067	2.71649	2.71144	2.69202	2.49722	2.49357	2.53981	2.59755	2.52539	2.33917	2.90954	2.70259	2.96739	2.77795	2.69159	2.47566	2.49494	2.44878	2.92444	3.0553	2.71554	2.81232	2.68773	2.6943	2.69224	2.6646	2.64127	2.94778	2.53972	2.69471	1.82516
14.3333	2.6609	2.7449	2.73449	2.71354	2.52132	2.51951	2.55905	2.62029	2.54833	2.35763	2.95004	2.73031	3.00294	2.81589	2.72822	2.51225	2.52494	2.4844	2.94778	3.07514	2.74107	2.8358	2.71351	2.72205	2.72124	2.6869	2.66916	2.97837	2.56096	2.72529	1.84803
14.6667	2.67501	2.76312	2.75112	2.73407	2.5416	2.54429	2.5746	2.63678	2.56884	2.37018	2.98082	2.76354	3.03618	2.84651	2.75775	2.54564	2.55593	2.51996	2.9728	3.09413	2.76355	2.85947	2.7459	2.74952	2.74872	2.71188	2.69799	3.0035	2.58544	2.74912	1.88415
15	2.68523	2.78205	2.76519	2.75527	2.5586	2.56439	2.59095	2.6579	2.5861	2.3884	3.0162	2.78902	3.07019	2.88275	2.78697	2.57726	2.58566	2.55593	2.99391	3.11193	2.78546	2.87912	2.77513	2.77632	2.77473	2.72975	2.7188	3.02842	2.60418	2.77553	1.90921
15.3333	2.69752	2.79678	2.78246	2.77137	2.57283	2.57903	2.60894	2.67288	2.59711	2.39794	3.04332	2.82115	3.10051	2.91268	2.81751	2.60807	2.61287	2.58522	3.01598	3.13282	2.80878	2.89634	2.79813	2.79853	2.8005	2.74872	2.74107	3.05168	2.62321	2.79971	1.93166
15.6667	2.70681	2.81021	2.7927	2.78041	2.58301	2.59447	2.62159	2.68608	2.61025	2.40649	3.07427	2.8433	3.12835	2.94191	2.84691	2.63981	2.63894	2.61898	3.03498	3.1462	2.82369	2.9127	2.8182	2.81192	2.82056	2.77034	2.75835	3.07262	2.64127	2.82095	1.95384
16	2.70976	2.82438	2.80045	2.79229	2.59842	2.61156	2.63028	2.69498	2.62072	2.41311	3.10161	2.86807	3.15956	2.96662	2.87919	2.66818	2.66604	2.64456	3.04879	3.16127	2.83736	2.9286	2.84047	2.8319	2.83151	2.78388	2.76955	3.09662	2.66086	2.83424	1.97242
16.3333	2.71733	2.83285	2.80655	2.80045	2.60981	2.62116	2.63894	2.70344	2.62551	2.41831	3.11922	2.895	3.18259	2.9938	2.90679	2.69583	2.68905	2.67288	3.06578	3.17974	2.84941	2.94403	2.85754	2.84824	2.84785	2.79774	2.78586	3.11619	2.67949	2.85289	1.98916
16.6667	2.7211	2.84049	2.81548	2.80614	2.61636	2.63028	2.6424	2.71565	2.63202	2.42679	3.14617	2.91463	3.20687	3.01923	2.93453	2.72194	2.71186	2.69752	3.07909	3.19396	2.8587	2.95826	2.87681	2.86025	2.86102	2.81192	2.79616	3.13105	2.6906	2.86565	1.99582
17	2.72404	2.84611	2.82074	2.81305	2.62203	2.64499	2.64671	2.72026	2.63548	2.42867	3.16677	2.93181	3.22779	3.04032	2.95661	2.7503	2.73323	2.72529	3.09019	3.20605	2.8722	2.96759	2.89023	2.87105	2.87489	2.8233	2.80602	3.1483	2.70535	2.88295	2.00301
17.3333	2.72445	2.84891	2.82357	2.81751	2.62637	2.65274	2.65188	2.7278	2.6411	2.4343	3.18259	2.95468	3.24788	3.05753	2.9812	2.7689	2.74864	2.74656	3.1034	3.21741	2.87873	2.978	2.89634	2.88104	2.88564	2.82838	2.81271	3.16546	2.72327	2.89138	2.00962
17.6667	2.72989	2.85012	2.82478	2.81872	2.62855	2.65918	2.65704	2.73282	2.64412	2.4357	3.19654	2.96547	3.26609	3.07279	2.99989	2.78983	2.76643	2.76725	3.11158	3.22735	2.88946	2.98763	2.90663	2.89099	2.89367	2.83541	2.81781	3.17522	2.73339	2.9032	2.01456
18	2.72864	2.85412	2.82519	2.82196	2.63028	2.66561	2.65961	2.73782	2.64757	2.43804	3.21078	2.97929	3.28386	3.08576	3.02074	2.81224	2.78287	2.78164	3.11868	3.23932	2.89787	2.9965	2.91763	2.90092	2.90206	2.84047	2.82447	3.1853	2.74187	2.91498	2.01894
18.3333	2.73031	2.85492	2.8264	2.82519	2.63461	2.67202	2.66304	2.74323	2.6493	2.44225	3.22107	2.9938	3.30084	3.09757	3.03994	2.83325	2.7931	2.79882	3.12611	3.24715	2.90244	3.00497	2.92709	2.90929	2.90929	2.84475	2.82643	3.19431	2.74791	2.92331	2.02441
18.6667	2.73031	2.85691	2.82842	2.8268	2.63721	2.67714	2.66561	2.74864	2.64973	2.44319	3.23379	3.00977	3.3167	3.10676	3.05529	2.84571	2.80208	2.81345	3.13211	3.25769	2.90625	3.01195	2.93689	2.91839	2.9127	2.85134	2.83073	3.2026	2.75795	2.9286	2.02441
19	2.73282	2.85571	2.82963	2.82761	2.63851	2.68012	2.66604	2.75195	2.65145	2.44365	3.2426	3.01998	3.32906	3.11776	3.06945	2.86011	2.81589	2.82801	3.1374	3.2665	2.90967	3.01671	2.9429	2.92407	2.91687	2.85599	2.83229	3.20915	2.76435	2.93726	2.03421
19.3333	2.71942	2.83446	2.81507	2.82074	2.63635	2.68098	2.67245	2.7623	2.63202	2.43851	3.24788	3.02678	3.33796	3.12653	3.08613	2.87602	2.82963	2.83969	3.14233	3.27495	2.9127	3.02294	2.94891	2.92897	2.92255	2.85909	2.83619	3.21363	2.77314	2.94215	2.03367
19.6667	2.73574	2.85811	2.83406	2.83406	2.64887	2.6814	2.67074	2.75278	2.65446	2.44692	3.25595	3.03543	3.35058	3.13527	3.09941	2.89184	2.83889	2.84771	3.1469	3.28337	2.91725	3.02659	2.95602	2.93425	2.92671	2.86295	2.8358	3.21878	2.78189	2.94628	2.03367
20	2.7324	2.85691	2.83003	2.83003	2.64671	2.69202	2.66946	2.76147	2.65532	2.44599	3.2626	3.03881	3.35636	3.14254	3.1086	2.90522	2.84611	2.85651	3.15181	3.29077	2.91953	3.03097	2.96349	2.93764	2.93011	2.86642	2.83697	3.22461	2.79062	2.95265	2.03367
20.3333	2.73198	2.85691	2.82963	2.83124	2.64844	2.69371	2.67074	2.76189	2.6536	2.44878	3.26749	3.04519	3.36248	3.1469	3.11593	2.91268	2.85332	2.8625	3.15567	3.29782	2.92369	3.03461	2.9661	2.94253	2.93275	2.87066	2.83775	3.22941	2.79655	2.95602	2.03584
20.6667	2.73323	2.85851	2.83003	2.83043	2.64973	2.69879	2.67202	2.76436	2.65446	2.44832	3.27202	3.05155	3.36858	3.15197	3.12799	2.91855	2.86011	2.86688	3.15777	3.30016	2.92558	3.0368	2.96945	2.94666	2.93463	2.87412	2.84008	3.23078	2.80287	2.96088	2.0391
21	2.73282	2.85891	2.83084	2.83245	2.64844	2.69837	2.67117	2.76312	2.65489	2.44738	3.27446	3.05305	3.37399	3.15414	3.13673	2.92596	2.8625	2.87006	3.16127	3.30518	2.92747	3.04007	2.9754	2.95078	2.93651	2.87681	2.84086	3.23556	2.80681	2.96461	2.03747
21.3333	2.73156	2.85771	2.83124	2.83205	2.64887	2.69879	2.67245	2.7656	2.65489	2.44785	3.2776	3.05753	3.38176	3.15667	3.14472	2.92986	2.86728	2.87681	3.16371	3.30919	2.9286	3.04371	2.97837	2.95527	2.93689	2.87912	2.84125	3.23898	2.81349	2.9687	2.03639
21.6667	2.73323	2.86011	2.83164	2.83205	2.65145	2.70132	2.6716	2.76436	2.65403	2.44738	3.27864	3.05977	3.38446	3.15811	3.15124	2.93336	2.86887	2.88117	3.16651	3.31286	2.93048	3.04516	2.98504	2.95864	2.94065	2.87989	2.84242	3.24	2.81506	2.97057	2.03801
22	2.73282	2.85971	2.83003	2.83124	2.65231	2.70132	2.67373	2.76478	2.65532	2.44738	3.27899	3.06424	3.39019	3.1592	3.15595	2.93997	2.87245	2.88434	3.16651	3.3152	2.93048	3.04588	2.98726	2.96088	2.94103	2.88142	2.84242	3.24307	2.8182	2.9728	2.03801
22.3333	2.73407	2.85931	2.83164	2.83124	2.65059	2.70217	2.6733	2.76601	2.65532	2.44645	3.28038	3.0661	3.39288	3.16136	3.1592	2.94578	2.87443	2.88592	3.16895	3.31786	2.93124	3.04915	2.98763	2.96386	2.94215	2.88219	2.84319	3.24341	2.82369	2.97614	2.03964
22.6667	2.72236	2.83607	2.8167	2.82155	2.64326	2.69921	2.67501	2.77178	2.63418	2.43758	3.28143	3.0687	3.3959	3.16245	3.16425	2.94927	2.87602	2.88987	3.16895	3.32385	2.93425	3.05168	2.99096	2.96908	2.94516	2.88372	2.84319	3.24579	2.82486	2.978	2.03856
23	2.73741	2.8617	2.83607	2.83325	2.65016	2.6971	2.67501	2.76023	2.65661	2.44599	3.28108	3.07019	3.39926	3.16353	3.16641	2.95545	2.87919	2.89224	3.17174	3.32751	2.93388	3.05096	2.99539	2.97057	2.94328	2.88525	2.84358	3.24818	2.82955	2.97948	2.03856
23.3333	2.73073	2.85971	2.83205	2.83003	2.64757	2.70301	2.67288	2.76643	2.65618	2.44365	3.28316	3.07168	3.40127	3.16497	3.17001	2.95699	2.87959	2.89303	3.17139	3.32884	2.93501	3.05168	2.99539	2.97317	2.94403	2.88449	2.84475	3.24886	2.83229	2.98096	2.03639
23.6667	2.73031	2.85931	2.83124	2.82801	2.64671	2.7009	2.67288	2.76766	2.65704	2.44319	3.28282	3.07316	3.40161	3.16605	3.17217	2.95892	2.87998	2.89381	3.17313	3.33017	2.93576	3.05349	2.9965	2.9754	2.94516	2.88525	2.84552	3.24954	2.83385	2.98356	2.03693
24	2.73031	2.8605	2.83043	2.8268	2.64542	2.7009	2.6733	2.76519	2.65618	2.44459	3.28316	3.07576	3.40228	3.16497	3.17325	2.96046	2.88196	2.895	3.17243	3.33182	2.93501	3.05494	2.99834	2.97651	2.94441	2.88679	2.84552	3.25192	2.83463	2.98245	2.03258
24.3333	2.72864	2.8605	2.82963	2.82842	2.64585	2.69879	2.67032	2.7656	2.65532	2.44365	3.28316	3.07427	3.40194	3.16641	3.17505	2.96085	2.88354	2.89618	3.17243	3.33415	2.93689	3.05494	2.99945	2.97614	2.94403	2.88564	2.84358	3.25362	2.83385	2.98578	2.03258
24.6667	2.72989	2.85771	2.83124	2.82721	2.64456	2.69963	2.67074	2.76271	2.65575	2.44505	3.28455	3.0765	3.40329	3.16893	3.17828	2.96239	2.88434	2.89736	3.17383	3.33481	2.93689	3.05567	3.00018	2.98022	2.94365	2.88602	2.84397	3.25633	2.8393	2.98541	2.03367
25	2.72697	2.85811	2.83003	2.82801	2.64542	2.69963	2.6733	2.76436	2.65618	2.44225	3.28386	3.07576	3.40429	3.16821	3.17936	2.96393	2.88473	2.89736	3.17383	3.3368	2.93689	3.05675	3.00166	2.98059	2.94253	2.88832	2.84514	3.25633	2.83852	2.98689	2.03476
25.3333	2.72697	2.85971	2.82882	2.82761	2.64499	2.69921	2.66989	2.76271	2.65661	2.44365	3.28421	3.0765	3.40429	3.16785	3.18008	2.96547	2.88513	2.89775	3.17522	3.3358	2.93689	3.05711	3.0035	2.98282	2.94365	2.88908	2.84242	3.25769	2.84047	2.98578	2.0315
25.6667	2.72655	2.85971	2.82801	2.8264	2.64369	2.69837	2.67074	2.76189	2.65661	2.44178	3.28386	3.07613	3.40563	3.16929	3.18187	2.9647	2.88631	2.89775	3.17487	3.33779	2.93614	3.0582	3.00239	2.98245	2.94553	2.88832	2.84319	3.25667	2.84125	2.98948	2.02877
26	2.72487	2.85731	2.82842	2.826	2.64369	2.69583	2.66732	2.75982	2.65489	2.44319	3.28386	3.0765	3.4053	3.16893	3.18294	2.96508	2.88592	2.89854	3.17557	3.33845	2.93764	3.05603	3.00239	2.98171	2.94553	2.88717	2.84397	3.25769	2.84047	2.98911	2.02932
26.3333	2.72487	2.85731	2.8264	2.8268	2.64283	2.69541	2.66989	2.75941	2.65532	2.44412	3.28351	3.0765	3.40563	3.16893	3.18294	2.96547	2.88552	2.89893	3.17418	3.33878	2.93651	3.05567	3.00313	2.98319	2.94591	2.88793	2.84125	3.25735	2.84086	2.988	2.02768
26.6667	2.72236	2.85731	2.826	2.82519	2.64326	2.69456	2.66818	2.75858	2.65446	2.44272	3.28386	3.07687	3.4053	3.17001	3.18402	2.96624	2.88552	2.89893	3.17487	3.33845	2.93689	3.05603	3.00276	2.98282	2.94441	2.88793	2.84242	3.25667	2.84242	2.988	2.02714
27	2.72152	2.85811	2.82438	2.82317	2.6411	2.69286	2.66604	2.75817	2.65489	2.44365	3.28316	3.07576	3.40597	3.17001	3.18366	2.96662	2.88513	2.89972	3.17418	3.33812	2.93614	3.0553	3.00386	2.98282	2.94328	2.88717	2.84242	3.25905	2.84047	2.99022	2.02277
27.3333	2.72278	2.85532	2.82438	2.82236	2.64197	2.69117	2.66604	2.75775	2.65575	2.44412	3.28282	3.07724	3.40496	3.17181	3.18509	2.96662	2.88631	2.89893	3.17348	3.33812	2.93538	3.05639	3.0046	2.98208	2.94403	2.88679	2.84203	3.25871	2.84125	2.98874	2.02004
27.6667	2.72152	2.85332	2.81912	2.82196	2.64153	2.68947	2.66518	2.75692	2.65317	2.44412	3.28247	3.07613	3.40496	3.17109	3.18688	2.96585	2.8871	2.90011	3.17383	3.33978	2.93651	3.05639	3.00239	2.98245	2.9429	2.88564	2.84125	3.25803	2.84086	2.98985	2.02168
28	2.72026	2.85292	2.82155	2.82236	2.64024	2.68905	2.66219	2.75485	2.65274	2.44319	3.28108	3.07539	3.40429	3.17001	3.18474	2.96701	2.88631	2.89933	3.17383	3.33878	2.93651	3.05494	3.00313	2.98282	2.94253	2.88564	2.83852	3.25701	2.84125	2.99096	2.01785
28.3333	2.71942	2.84972	2.81912	2.82115	2.6411	2.68947	2.66261	2.7532	2.65188	2.44178	3.28073	3.07539	3.40463	3.17001	3.18617	2.96624	2.88592	2.89972	3.17383	3.33878	2.93689	3.05422	3.0035	2.98022	2.94178	2.88525	2.8393	3.25972	2.83969	2.98948	2.0173
28.6667	2.72026	2.84811	2.8167	2.82155	2.64024	2.6882	2.66133	2.7532	2.65188	2.44132	3.28073	3.07539	3.40463	3.17145	3.18545	2.96739	2.88513	2.90011	3.17383	3.3411	2.93839	3.05458	3.00239	2.97985	2.94328	2.88602	2.83969	3.25735	2.84047	2.98985	2.01346
29	2.71901	2.84771	2.81426	2.82115	2.63981	2.68693	2.66047	2.75071	2.65102	2.44225	3.27899	3.07576	3.40396	3.17145	3.18474	2.96778	2.88552	2.89893	3.17209	3.33779	2.93614	3.05313	3.00386	2.98022	2.94065	2.88487	2.83697	3.25599	2.8393	2.98985	2.00962
29.3333	2.72026	2.84731	2.81224	2.81993	2.63894	2.6848	2.65661	2.74905	2.64887	2.44085	3.27864	3.07539	3.40396	3.17073	3.18653	2.96816	2.88513	2.89972	3.17139	3.33911	2.93425	3.05349	3.00202	2.97948	2.94215	2.88564	2.83541	3.25599	2.83891	2.99059	2.01236
29.6667	2.71984	2.84571	2.81142	2.81912	2.63937	2.68438	2.65704	2.74656	2.64887	2.44038	3.27864	3.07502	3.40362	3.17109	3.18617	2.96662	2.88434	2.89815	3.17313	3.33945	2.93576	3.05241	3.00092	2.97985	2.94027	2.88525	2.83541	3.25939	2.83813	2.99022	2.00907
30	2.71817	2.84571	2.81142	2.82074	2.63981	2.68268	2.6536	2.74614	2.64628	2.44038	3.27725	3.07539	3.40261	3.16929	3.18509	2.96778	2.88394	2.89854	3.17139	3.33978	2.93463	3.05241	3.00313	2.97911	2.94027	2.88334	2.83307	3.25701	2.83813	2.9917	2.00907
30.3333	2.71733	2.8437	2.81102	2.81872	2.64024	2.6814	2.65403	2.74365	2.64714	2.43851	3.27446	3.07502	3.40228	3.17001	3.18617	2.96739	2.88434	2.90011	3.16999	3.33911	2.93237	3.04951	3.00313	2.97763	2.9399	2.88219	2.83268	3.25701	2.83658	2.99096	2.00741
30.6667	2.71691	2.8425	2.8098	2.81832	2.63808	2.68183	2.65188	2.7449	2.64628	2.43804	3.27586	3.07502	3.40161	3.17073	3.18581	2.96585	2.88513	2.89893	3.17069	3.33845	2.93237	3.05023	3.00166	2.97688	2.93802	2.88142	2.83073	3.25735	2.8358	2.9917	2.00411
31	2.71733	2.8413	2.80899	2.81751	2.63808	2.68353	2.64973	2.7424	2.64369	2.43851	3.27481	3.07353	3.40127	3.17037	3.18509	2.96585	2.88552	2.89854	3.17034	3.33812	2.92973	3.04879	3.00129	2.97763	2.93915	2.88027	2.8319	3.25599	2.83346	2.99059	2.0019
31.3333	2.71691	2.84049	2.80736	2.81791	2.63851	2.67842	2.64973	2.74074	2.64326	2.4357	3.27412	3.07427	3.40194	3.16929	3.18402	2.96624	2.88513	2.90011	3.16999	3.33945	2.93086	3.04915	3.00055	2.97948	2.93764	2.8795	2.82994	3.25599	2.83346	2.99096	2.00024
31.6667	2.71649	2.83969	2.80736	2.81629	2.63721	2.6797	2.65016	2.73949	2.64499	2.43477	3.27307	3.0739	3.3996	3.16929	3.18474	2.96547	2.88394	2.90011	3.1693	3.3368	2.9286	3.04733	3.00018	2.97614	2.93764	2.87835	2.82916	3.25701	2.83424	2.98948	2.00135
32	2.71691	2.8413	2.80574	2.81345	2.63678	2.6797	2.65016	2.73866	2.64671	2.4343	3.27342	3.07316	3.4006	3.17001	3.1833	2.96547	2.88354	2.89972	3.16965	3.33945	2.92709	3.04806	3.00018	2.97354	2.93839	2.87835	2.82838	3.25497	2.83229	2.99059	1.99693
32.3333	2.71859	2.83969	2.80655	2.81426	2.63678	2.67799	2.64801	2.73866	2.64456	2.43336	3.27202	3.07056	3.39892	3.16857	3.18402	2.96393	2.88275	2.89893	3.16999	3.33812	2.92747	3.04733	3.00055	2.97466	2.93764	2.8772	2.82838	3.25531	2.83307	2.98911	2.0008
32.6667	2.71859	2.84009	2.80696	2.81264	2.63635	2.67672	2.64844	2.73782	2.64283	2.43242	3.27168	3.07168	3.39892	3.16929	3.18402	2.96393	2.88315	2.89972	3.16895	3.33878	2.9286	3.04625	2.99981	2.97354	2.93764	2.87489	2.82682	3.25362	2.8319	2.98837	1.99859
33	2.71733	2.83889	2.80655	2.81183	2.63548	2.67714	2.64801	2.73699	2.64283	2.43148	3.27133	3.07093	3.39825	3.16929	3.18294	2.96431	2.88275	2.89815	3.16895	3.33911	2.92709	3.04733	2.99871	2.97205	2.93764	2.87758	2.82565	3.25531	2.83268	2.98837	1.99471
33.3333	2.71817	2.83929	2.80777	2.81183	2.63548	2.67458	2.64844	2.73699	2.64456	2.43101	3.27098	3.06833	3.39892	3.16857	3.18294	2.96354	2.88157	2.89736	3.16651	3.33845	2.92558	3.04588	2.99834	2.97168	2.93839	2.87566	2.82604	3.25396	2.83151	2.988	1.99471
33.6667	2.71817	2.8413	2.80777	2.81061	2.63418	2.67501	2.64714	2.73657	2.64456	2.42961	3.27133	3.06833	3.39825	3.16749	3.1833	2.96393	2.88236	2.89775	3.16755	3.33845	2.92709	3.04697	2.99945	2.97205	2.93614	2.87489	2.82408	3.25294	2.83151	2.98763	1.99083
34	2.7211	2.83969	2.80777	2.81061	2.63548	2.67245	2.64844	2.7349	2.64628	2.43101	3.26923	3.06907	3.39792	3.16785	3.1833	2.9647	2.88236	2.89736	3.16546	3.33812	2.92558	3.04516	2.99797	2.97057	2.93538	2.87489	2.82291	3.2526	2.83073	2.98689	1.99416
34.3333	2.71817	2.83848	2.8098	2.81183	2.63418	2.67117	2.64628	2.73657	2.64499	2.43007	3.26854	3.06833	3.39758	3.16749	3.18259	2.96393	2.88236	2.89697	3.16441	3.34044	2.92558	3.04516	2.99539	2.96982	2.93501	2.87566	2.82095	3.25362	2.83424	2.98615	1.99305
34.6667	2.71817	2.83929	2.80818	2.81142	2.63505	2.66775	2.64801	2.73574	2.64499	2.42914	3.26819	3.0687	3.39725	3.16749	3.18151	2.9647	2.88077	2.89775	3.16651	3.33911	2.92369	3.04443	2.9965	2.96908	2.93576	2.87528	2.81977	3.2526	2.83034	2.98504	1.99305
35	2.71984	2.83929	2.80777	2.81102	2.63332	2.66946	2.64757	2.73699	2.64628	2.4282	3.26819	3.06721	3.39725	3.16713	3.18223	2.96354	2.88157	2.89618	3.16441	3.33978	2.92482	3.04371	2.99502	2.9687	2.93576	2.87412	2.8186	3.25294	2.83229	2.98615	1.98916
35.3333	2.7211	2.84009	2.8098	2.81183	2.63591	2.66818	2.64628	2.73407	2.64757	2.42726	3.26714	3.06721	3.39624	3.16677	3.17972	2.96393	2.88157	2.89539	3.16441	3.34044	2.92331	3.04298	2.99539	2.96833	2.93501	2.87335	2.82016	3.25226	2.83268	2.98393	1.98972
35.6667	2.71817	2.83969	2.80818	2.81061	2.63245	2.66433	2.64844	2.73782	2.64757	2.42914	3.26679	3.06647	3.39691	3.16605	3.18115	2.96354	2.88117	2.895	3.16301	3.34209	2.92293	3.04298	2.99244	2.96945	2.93425	2.87258	2.81663	3.25056	2.83151	2.98393	1.98694
36	2.71942	2.84009	2.80899	2.8094	2.63461	2.6669	2.64844	2.73824	2.64801	2.42867	3.26574	3.06684	3.3959	3.16677	3.17864	2.96354	2.88117	2.89815	3.16476	3.34176	2.92066	3.04262	2.99391	2.96721	2.93501	2.8722	2.81781	3.2509	2.83073	2.98356	1.9875
36.3333	2.71901	2.84049	2.80899	2.81021	2.63375	2.66304	2.64844	2.73824	2.64801	2.42914	3.26539	3.06535	3.39725	3.16569	3.17792	2.96316	2.87998	2.89539	3.16406	3.34209	2.91915	3.04262	2.99281	2.96647	2.93538	2.87181	2.81663	3.25056	2.83385	2.98393	1.98694
36.6667	2.71901	2.8429	2.8098	2.81183	2.63505	2.66433	2.64887	2.73782	2.64844	2.42867	3.26574	3.06424	3.39523	3.16605	3.1772	2.96316	2.88077	2.89539	3.16266	3.34143	2.92104	3.04225	2.99133	2.96647	2.93425	2.87258	2.81546	3.25056	2.83346	2.98282	1.98248
37	2.71775	2.8421	2.8094	2.81142	2.63505	2.66347	2.64757	2.73741	2.64887	2.42914	3.26539	3.06387	3.3959	3.16533	3.17613	2.96239	2.87998	2.895	3.16336	3.34408	2.9218	3.04225	2.9917	2.96721	2.93538	2.87143	2.81546	3.25124	2.8358	2.98282	1.98527
37.3333	2.72068	2.8421	2.81102	2.81224	2.63461	2.66176	2.64757	2.74032	2.65102	2.42867	3.26365	3.06573	3.39489	3.16569	3.17613	2.96239	2.88077	2.895	3.16057	3.34507	2.92104	3.04044	2.99133	2.96498	2.93388	2.87181	2.81349	3.2509	2.83385	2.98208	1.98471
37.6667	2.71859	2.8433	2.81183	2.81224	2.63548	2.66133	2.64887	2.73866	2.6536	2.43054	3.2633	3.06387	3.39489	3.16497	3.17613	2.96354	2.88038	2.89381	3.16057	3.34408	2.92066	3.04044	2.99022	2.96721	2.93425	2.8722	2.8131	3.24988	2.83385	2.98356	1.98471
38	2.71901	2.8437	2.8094	2.81305	2.63591	2.65961	2.64887	2.73824	2.65231	2.43195	3.26155	3.06535	3.39523	3.16461	3.1772	2.96239	2.88117	2.8946	3.16057	3.34507	2.91877	3.04044	2.99059	2.96647	2.9335	2.87258	2.81153	3.24818	2.83619	2.98208	1.97802
38.3333	2.72068	2.84089	2.81224	2.81548	2.63678	2.6609	2.64887	2.74157	2.64973	2.43242	3.26155	3.06275	3.39456	3.16533	3.17577	2.96162	2.87998	2.89342	3.16022	3.34705	2.92142	3.04116	2.98837	2.96535	2.9335	2.87258	2.81153	3.24988	2.83385	2.98208	1.98248
38.6667	2.71984	2.84411	2.81061	2.81345	2.63678	2.66176	2.64714	2.74115	2.65231	2.43242	3.26085	3.06349	3.39422	3.16425	3.17577	2.96162	2.87919	2.89381	3.16057	3.34837	2.91839	3.03935	2.988	2.96684	2.93237	2.87258	2.81232	3.24954	2.83658	2.9843	1.97858
39	2.72026	2.8433	2.81183	2.81386	2.63721	2.65833	2.64757	2.74407	2.65145	2.43523	3.2591	3.06238	3.39456	3.16317	3.17649	2.96239	2.87959	2.89303	3.15987	3.3487	2.91877	3.03789	2.98763	2.96498	2.93162	2.87181	2.81074	3.2492	2.83658	2.98319	1.97969
39.3333	2.71984	2.84411	2.81264	2.81386	2.63808	2.6609	2.64844	2.74282	2.65403	2.43617	3.2612	3.06126	3.39422	3.16281	3.17577	2.96393	2.87959	2.89303	3.16057	3.35233	2.9199	3.04007	2.98652	2.96572	2.93124	2.87143	2.80956	3.24647	2.83619	2.98319	1.98081
39.6667	2.72152	2.84411	2.81183	2.81548	2.63808	2.66004	2.64757	2.74074	2.65102	2.43664	3.26085	3.062	3.39624	3.16425	3.17613	2.96316	2.87879	2.89263	3.15882	3.352	2.9165	3.04007	2.98652	2.96572	2.92973	2.87335	2.81035	3.24886	2.83736	2.98134	1.97858
40	2.71942	2.84451	2.81061	2.81548	2.63808	2.65918	2.64757	2.74157	2.65102	2.43851	3.2612	3.06349	3.39523	3.16389	3.17361	2.96239	2.87721	2.89184	3.15637	3.35365	2.91801	3.03935	2.98578	2.96386	2.92973	2.87143	2.80917	3.24954	2.83852	2.98059	1.97242
40.3333	2.72026	2.84571	2.81142	2.81507	2.63981	2.66047	2.64887	2.74448	2.65231	2.43945	3.2605	3.06126	3.39355	3.16533	3.17613	2.96316	2.87919	2.89184	3.15777	3.35299	2.91915	3.04007	2.98541	2.96461	2.92935	2.8695	2.80917	3.24784	2.83813	2.98208	1.97298
40.6667	2.7211	2.84411	2.81102	2.81629	2.63851	2.66176	2.6493	2.74531	2.65102	2.43991	3.2605	3.06163	3.39557	3.16497	3.17577	2.96316	2.87919	2.89263	3.15602	3.35464	2.91801	3.03825	2.98541	2.96535	2.92935	2.8695	2.8076	3.24647	2.83852	2.98171	1.97522
41	2.72152	2.8425	2.81345	2.8167	2.64024	2.66047	2.64844	2.74448	2.65274	2.44038	3.26085	3.05977	3.39456	3.16353	3.17361	2.96316	2.87721	2.89263	3.15602	3.35529	2.91953	3.03753	2.9843	2.96572	2.92747	2.86989	2.80681	3.24886	2.8393	2.98134	1.97186
41.3333	2.7211	2.8425	2.81183	2.81629	2.63937	2.66261	2.64844	2.74614	2.65274	2.43991	3.2605	3.06126	3.39422	3.16353	3.17505	2.96431	2.87879	2.89224	3.15602	3.35562	2.91801	3.03716	2.9843	2.96572	2.92784	2.87105	2.80681	3.24715	2.83813	2.97985	1.97242
41.6667	2.72236	2.84571	2.81142	2.8171	2.64153	2.66433	2.64887	2.74531	2.65274	2.44038	3.26085	3.05977	3.39489	3.16425	3.17505	2.9647	2.87919	2.89184	3.15742	3.35826	2.91763	3.03971	2.98504	2.96461	2.92671	2.8722	2.80484	3.24818	2.83969	2.98096	1.96906
42	2.72445	2.84571	2.81264	2.8167	2.6424	2.6609	2.64973	2.74614	2.65317	2.44132	3.26015	3.05939	3.39489	3.16425	3.17325	2.96547	2.8776	2.89224	3.15742	3.35892	2.91801	3.03862	2.98615	2.96572	2.92784	2.87143	2.80641	3.24681	2.84164	2.97985	1.97074
42.3333	2.72404	2.84651	2.81426	2.81548	2.6424	2.6609	2.64757	2.7449	2.6536	2.43898	3.2605	3.05827	3.39523	3.16425	3.17325	2.96508	2.8784	2.89145	3.15567	3.36023	2.9165	3.03862	2.9843	2.96684	2.9286	2.87105	2.8072	3.24886	2.84086	2.98022	1.97018
42.6667	2.72487	2.84491	2.81426	2.8171	2.64197	2.6639	2.64844	2.74323	2.6536	2.43758	3.26085	3.05865	3.39489	3.16533	3.17433	2.96624	2.87959	2.89303	3.15357	3.3599	2.91839	3.0368	2.98356	2.96572	2.92633	2.87181	2.80366	3.2475	2.84164	2.98096	1.97018
43	2.72362	2.84611	2.81183	2.81589	2.64369	2.66261	2.6493	2.74448	2.65489	2.43991	3.25945	3.05865	3.39456	3.16461	3.17253	2.96508	2.87919	2.89224	3.15427	3.36089	2.91725	3.03716	2.98467	2.96759	2.92558	2.87181	2.80444	3.24818	2.8428	2.98022	1.96737
43.3333	2.72362	2.84691	2.81386	2.8171	2.6424	2.66176	2.65145	2.74365	2.65575	2.44085	3.2619	3.05865	3.39523	3.16497	3.17469	2.96547	2.8784	2.89263	3.15602	3.36155	2.9165	3.03716	2.98393	2.96684	2.92595	2.87028	2.80326	3.2475	2.84242	2.97985	1.96737
43.6667	2.72487	2.84571	2.81264	2.8171	2.6424	2.66176	2.65317	2.74448	2.65747	2.44132	3.26085	3.0579	3.39624	3.16569	3.17397	2.9647	2.87879	2.89184	3.15532	3.36451	2.91801	3.03753	2.98615	2.96721	2.92558	2.87066	2.80405	3.24852	2.84475	2.97948	1.96625
44	2.72613	2.84691	2.81548	2.81872	2.64326	2.66347	2.65102	2.74614	2.6579	2.44085	3.2598	3.05753	3.39489	3.16641	3.17325	2.96508	2.8784	2.89263	3.15427	3.36483	2.9165	3.03753	2.9843	2.96759	2.92482	2.87143	2.80287	3.24818	2.84358	2.97948	1.96287
44.3333	2.72655	2.84932	2.81629	2.81912	2.64283	2.66347	2.65317	2.74531	2.65833	2.43758	3.2619	3.05753	3.39624	3.16605	3.17253	2.96508	2.8784	2.89224	3.15321	3.36582	2.91801	3.03571	2.98541	2.96684	2.9252	2.86989	2.80326	3.24818	2.84397	2.97948	1.96569
44.6667	2.71439	2.82438	2.80126	2.8094	2.63937	2.65575	2.65747	2.75154	2.63937	2.43007	3.2598	3.05716	3.39624	3.16605	3.17217	2.96624	2.87879	2.89224	3.15321	3.36943	2.9165	3.03643	2.98578	2.96721	2.92558	2.87066	2.80523	3.2475	2.84397	2.97985	1.96625
45	2.72947	2.85452	2.82438	2.82155	2.64671	2.6579	2.65403	2.7424	2.6609	2.44038	3.26155	3.05716	3.39691	3.16713	3.17289	2.96701	2.87879	2.89342	3.15251	3.3691	2.91574	3.03643	2.98319	2.96684	2.92444	2.87028	2.80287	3.24784	2.8463	2.97911	1.96569
45.3333	2.72697	2.84972	2.81912	2.81791	2.64456	2.65875	2.65704	2.74739	2.66176	2.43991	3.2591	3.05604	3.39691	3.16641	3.17397	2.96624	2.87959	2.89342	3.15357	3.36943	2.91612	3.03607	2.98541	2.96796	2.92331	2.87105	2.80208	3.24886	2.84514	2.97985	1.96456
45.6667	2.72655	2.85012	2.82034	2.81872	2.64369	2.66047	2.65489	2.74822	2.66133	2.43991	3.2605	3.05604	3.39691	3.16677	3.17397	2.96778	2.87919	2.89303	3.15146	3.37205	2.91574	3.03571	2.98541	2.96759	2.92331	2.87028	2.80168	3.2492	2.84902	2.97948	1.96231
46	2.71691	2.82761	2.8037	2.81061	2.63894	2.65575	2.66004	2.75403	2.64671	2.43336	3.2605	3.05678	3.39758	3.16749	3.17361	2.96701	2.87998	2.8946	3.15251	3.37271	2.9165	3.03571	2.98541	2.96684	2.92369	2.87028	2.80405	3.2475	2.84824	2.97763	1.96175
46.3333	2.71565	2.8268	2.80492	2.80899	2.63894	2.65661	2.66176	2.75485	2.64369	2.4343	3.26015	3.05641	3.39825	3.16785	3.17469	2.96816	2.87959	2.89303	3.15111	3.37402	2.91536	3.03571	2.98763	2.96759	2.92369	2.86989	2.80168	3.24818	2.85057	2.97837	1.964
46.6667	2.72989	2.85571	2.82801	2.82196	2.64671	2.65875	2.66004	2.74531	2.66775	2.44225	3.2612	3.05566	3.39758	3.16749	3.17505	2.96739	2.87998	2.89381	3.15321	3.37336	2.91498	3.03571	2.98689	2.96796	2.92331	2.8695	2.80208	3.25022	2.84902	2.97911	1.96175
47	2.72697	2.85412	2.82074	2.82115	2.64542	2.6639	2.66004	2.7503	2.66476	2.44085	3.2612	3.05678	3.39758	3.16713	3.17361	2.96816	2.87998	2.89539	3.15041	3.37664	2.91498	3.03643	2.98689	2.96982	2.92331	2.8695	2.80208	3.24954	2.84863	2.97948	1.96006
47.3333	2.72697	2.85372	2.82115	2.81953	2.64671	2.66261	2.65961	2.75154	2.66775	2.44272	3.26155	3.05716	3.39859	3.16785	3.17541	2.96893	2.88038	2.89381	3.15146	3.37566	2.91346	3.03571	2.98837	2.96908	2.92217	2.87105	2.80129	3.24852	2.85134	2.97948	1.96006
47.6667	2.72655	2.85412	2.82155	2.82115	2.64714	2.66347	2.6609	2.75112	2.66732	2.44412	3.26015	3.05641	3.39825	3.16857	3.17325	2.96816	2.87998	2.89421	3.15251	3.37795	2.91574	3.03461	2.988	2.96982	2.92255	2.87028	2.80287	3.25124	2.85289	2.97948	1.96118
48	2.71228	2.82842	2.80858	2.81345	2.64153	2.65704	2.66347	2.76023	2.64671	2.43804	3.26085	3.05604	3.39859	3.16749	3.17361	2.96931	2.88038	2.89381	3.15216	3.37926	2.91384	3.0368	2.98689	2.96982	2.92369	2.86989	2.80129	3.24988	2.85522	2.97948	1.96231

## Sheet: Radius 60s
t (h)	Radius [mm]
2.66667
3													0.627269
3.33333	0.642653					0.660168							0.810256	0.611205	0.654854	0.653164	0.68456
3.66667	0.802162	0.740019	0.673851	0.571223		0.783454	0.660168	0.670457	0.719698				0.996247	0.782499	0.812979	0.781085	0.806153
4	0.902551	0.850486	0.797884	0.768754		0.891101	0.858497	0.789258	0.831493	0.743096	0.672156		1.09457	0.889581	0.93442	0.904367	0.935603
4.33333	0.987078	0.936059	0.908849	0.905075		0.981282	0.981282	0.883386	0.932395	0.866434	0.819051		1.2197	1.00838	1.0492	1.01057	1.04498	0.632533	0.66822
4.66667	1.06277	1.0088	0.996282	1.00767		1.07452	1.09346	0.970762	1.02228	0.967229	0.937277		1.30717	1.08748	1.15261	1.1126	1.14973	0.768244	0.792324
5	1.14344	1.08508	1.08087	1.09867		1.16028	1.18846	1.05307	1.11208	1.05198	1.04436		1.4214	1.18476	1.24481	1.20969	1.235	0.890822	0.872013
5.33333	1.22253	1.15733	1.15831	1.19133		1.24381	1.29062	1.13644	1.19516	1.14444	1.13644	0.577184	1.49714	1.25894	1.33644	1.2893	1.32398	0.978335	0.95663
5.66667	1.28797	1.22346	1.23275	1.27372		1.32809	1.37453	1.21785	1.27551	1.22625	1.22066	0.660168	1.59646	1.34961	1.42683	1.38118	1.40498	1.07316	1.01493
6	1.3553	1.29062	1.29415	1.34006	0.598532	1.41057	1.45124	1.29855	1.35108	1.30993	1.30556	0.727581	1.67286	1.41595	1.50964	1.46807	1.48974	1.1612	1.10462
6.33333	1.43145	1.36453	1.36369	1.41864	0.663615	1.49461	1.54269	1.36954	1.43225	1.3861	1.37867	0.793582	1.7598	1.49566	1.6013	1.55437	1.56782	1.24658	1.17539
6.66667						1.58788	1.62271	1.45908	1.52932	1.48773	1.48004	0.880799	1.86766	1.58186	1.68799	1.64017	1.64891	1.33727	1.235
7	1.59147	1.50071	1.51131	1.59648	0.800738	1.67869	1.70365	1.53973	1.61919	1.56982	1.56982	0.950572	1.93851	1.65359	1.7866	1.74466	1.73003	1.41595	1.32314
7.33333	1.66436	1.572	1.57924	1.67393	0.863796	1.7616	1.78412	1.61566	1.70097	1.6381	1.64089	1.00654	2.04127	1.74529	1.88063	1.83783	1.80568	1.50524	1.37556
7.66667	1.7401	1.6395	1.64644	1.74795	0.920078	1.84696	1.85313	1.69492	1.79178	1.72363	1.73616	1.06706	2.09524	1.79647	1.97354	1.91615	1.87651	1.58116	1.46052
8	1.81204	1.70164	1.713	1.83145	0.983604	1.92855	1.92025	1.77386	1.87394	1.81141	1.82459	1.14643	2.1967	1.88004	2.0687	2.00907	1.95215	1.67286	1.51476
8.33333	1.88063	1.75836	1.77129	1.90234	1.04327	2.00626	1.98511	1.84449	1.9614	1.89212	1.91012	1.20466	2.23511	1.93108	2.16222	2.09313	2.02986	1.75351	1.59508
8.66667	1.94622	1.81393	1.84078	1.97531	1.10074	2.08161	2.05013	1.91012	2.03561	1.95207	1.99428	1.27908	2.29993	1.98583	2.243	2.16426	2.09154	1.83181	1.65226
9	2.00512	1.87029	1.89634	2.04735	1.16323	2.15698	2.11963	1.96198	2.10451	2.01307	2.05236	1.33152	2.40701	2.06549	2.32288	2.24842	2.15966	1.92707	1.69648
9.33333	2.06731	1.91549	1.96024	2.11154	1.21033	2.23082	2.17646	2.01986	2.17961	2.08106	2.13679	1.40328	2.44753	2.10996	2.41846	2.33995	2.23659	2.00135	1.77169
9.66667	2.12983	1.96489	2.01194	2.17541	1.26021	2.29833	2.23389	2.07997	2.26281	2.15062	2.23134	1.49309	2.53275	2.18712	2.49095	2.39827	2.27821	2.07403	1.80016
10	2.18901	2.00967	2.07338	2.24052	1.31514	2.36585	2.29833	2.13572	2.33624	2.21234	2.3023	1.56764	2.57559	2.23214	2.59227	2.49494	2.36719	2.15299	1.88767
10.3333	2.24713	2.05902	2.13358	2.30081	1.36286	2.43851	2.35424	2.19109	2.40601	2.27388	2.37595	1.63042	2.63246	2.2903	2.66833	2.5588	2.42622	2.21524	1.94136
10.6667	2.29088	2.09962	2.18327	2.36536	1.40328	2.50907	2.42255	2.23695	2.45715	2.31219	2.42491	1.68276	2.68402	2.32954	2.72286	2.61096	2.46194	2.25529	1.97969
11	2.35085	2.14318	2.23746	2.42114	1.45516	2.58257	2.48761	2.30081	2.54967	2.38984	2.51951	1.78028	2.74026	2.39088	2.79695	2.66998	2.52445	2.31239	2.03095
11.3333	2.41264	2.19057	2.29982	2.48853	1.50602	2.66047	2.56083	2.36729	2.63245	2.46226	2.60981	1.86479	2.82838	2.46284	2.89672	2.76635	2.608	2.4093	2.10261
11.6667	2.46873	2.23899	2.35666	2.55325	1.55741	2.72571	2.62507	2.41972	2.68268	2.50862	2.65918	1.92144	2.89214	2.52182	2.96237	2.83502	2.65421	2.4552	2.15659
12	2.5416	2.29833	2.42161	2.62072	1.61071	2.77918	2.66861	2.47151	2.75568	2.57416	2.74573	1.99657	2.94666	2.57044	3.03206	2.8818	2.70044	2.49405	2.20373
12.3333	2.61069	2.35279	2.49448	2.69583	1.68141	2.82721	2.71775	2.50634	2.79637	2.60369	2.77548	2.03505	2.99317	2.62026	3.08303	2.91232	2.74227	2.5345	2.25136
12.6667	2.66433	2.39936	2.5425	2.74573	1.72957	2.87086	2.75485	2.5528	2.85611	2.66647	2.84972	2.10288	3.02805	2.65546	3.13105	2.93651	2.77194	2.56182	2.2816
13	2.71102	2.44132	2.59271	2.79555	1.76742	2.91698	2.79024	2.59095	2.8946	2.70554	2.89697	2.14105	3.08733	2.70412	3.15567	2.95303	2.78745	2.58416	2.28063
13.3333	2.74864	2.4798	2.62985	2.83929	1.79877	2.94888	2.82721	2.62333	2.94191	2.75278	2.93492	2.18953	3.09413	2.72408	3.19604	2.9917	2.8319	2.60842	2.34703
13.6667	2.79106	2.51271	2.67202	2.87562	1.83581	2.9835	2.8605	2.66561	2.97814	2.78902	2.98044	2.22929	3.1208	2.75514	3.22735	3.01928	2.85947	2.63288	2.38023
14	2.82236	2.54609	2.70976	2.91698	1.86846	3.02149	2.89972	2.68947	3.00673	2.81142	2.9938	2.24459	3.15392	2.78388	3.25837	3.05458	2.88755	2.65171	2.40333
14.3333	2.85092	2.57505	2.74074	2.95081	1.89634	3.05043	2.92128	2.72613	3.05267	2.86449	3.05267	2.30131	3.20087	2.82056	3.3025	3.08876	2.91953	2.68402	2.45024
14.6667	2.88631	2.60544	2.76849	2.99037	1.92441	3.0828	2.95815	2.7503	3.0765	2.88236	3.07056	2.32449	3.22015	2.83969	3.32552	3.10518	2.93802	2.69758	2.46643
15	2.91346	2.63375	2.80004	3.01847	1.95441	3.11116	2.98235	2.78123	3.12105	2.92869	3.12507	2.36633	3.26548	2.88564	3.37435	3.14479	2.97651	2.72408	2.50643
15.3333	2.94036	2.65704	2.83003	3.04369	1.98223	3.14145	3.01166	2.80858	3.14508	2.94152	3.14073	2.38314	3.29513	2.90891	3.3985	3.17278	2.99797	2.73622	2.52926
15.6667	2.96662	2.6831	2.85492	3.06982	2.00683	3.16353	3.0328	2.83446	3.17433	2.97392	3.1772	2.41784	3.33945	2.93915	3.42151	3.19258	3.01488	2.75153	2.53188
16	2.98541	2.7009	2.87681	3.0972	2.02494	3.18509	3.05006	2.85771	3.20438	3.0018	3.20758	2.44738	3.33182	2.93538	3.44019	3.20018	3.02805	2.75032	2.56441
16.3333	3.00863	2.71523	2.90129	3.11776	2.04009	3.20509	3.06535	2.88552	3.23626	3.03919	3.25209	2.47888	3.36516	2.96684	3.48139	3.23283	3.05494	2.77154	2.59951
16.6667	3.02791	2.7399	2.91737	3.13891	2.05902	3.22638	3.09019	2.90483	3.25139	3.04669	3.26155	2.48853	3.37435	2.97094	3.49185	3.23795	3.05783	2.77194	2.60715
17	3.04706	2.75278	2.93297	3.15486	2.07117	3.23732	3.10345	2.9244	3.2776	3.07242	3.29219	2.51724	3.39362	2.98356	3.51079	3.25192	3.06686	2.77752	2.62068
17.3333	3.06088	2.76354	2.95004	3.16893	2.08654	3.25033	3.1119	2.94462	3.30464	3.11043	3.327	2.54474	3.42958	3.01671	3.52744	3.26514	3.07765	2.79339	2.61731
17.6667	3.07279	2.77548	2.9647	3.18366	2.09908	3.26015	3.12397	2.95931	3.32151	3.132	3.34751	2.56528	3.427	3.01342	3.54151	3.28102	3.0952	2.79457	2.66211
18	3.08428	2.78656	2.97852	3.19439	2.10884	3.26714	3.13927	2.96816	3.32837	3.13236	3.35398	2.56973	3.43891	3.02549	3.55801	3.29513	3.10625	2.80208	2.67577
18.3333	3.0924	2.79147	2.98885	3.2058	2.11262	3.27446	3.14218	2.98311	3.34854	3.16965	3.39153	2.59051	3.47885	3.05856	3.57444	3.31153	3.11442	2.81349	2.67123
18.6667	3.09977	2.80004	2.99304	3.21752	2.12178	3.28351	3.15739	2.98808	3.35466	3.16893	3.39456	2.59271	3.45686	3.03498	3.57784	3.30952	3.12151	2.80366	2.69307
19	3.10492	2.80696	3.00104	3.22496	2.1309	3.29115	3.16281	3.00066	3.36553	3.18867	3.41065	2.605	3.46453	3.04407	3.58617	3.3132	3.12434	2.80366	2.70003
19.3333	3.1119	2.80696	3.01545	3.23873	2.14318	3.29773	3.16821	3.00939	3.37501	3.20117	3.42367	2.61549	3.47663	3.05023	3.59909	3.32086	3.13388	2.80838	2.70821
19.6667	3.11483	2.81345	3.01961	3.24049	2.14318	3.30257	3.17397	3.01885	3.38446	3.21469	3.43565	2.62681	3.47122	3.04298	3.59479	3.31553	3.12788	2.80247	2.70617
20	3.11922	2.81629	3.02715	3.24506	2.14797	3.30429	3.17253	3.02565	3.39389	3.23732	3.4575	2.64197	3.48552	3.05349	3.60921	3.32518	3.13775	2.8076	2.72245
20.3333	3.12434	2.82034	3.03318	3.25139	2.15115	3.30912	3.1833	3.02866	3.39523	3.23415	3.45353	2.63981	3.49217	3.06217	3.61686	3.33216	3.14409	2.81349	2.72935
20.6667	3.12799	2.82196	3.03581	3.25665	2.15327	3.31188	3.18438	3.03881	3.39993	3.24612	3.46343	2.65059	3.48615	3.05168	3.61258	3.32219	3.13564	2.80563	2.72245
21	3.12981	2.82357	3.03769	3.2612	2.15592	3.31257	3.18259	3.04594	3.40496	3.26644	3.48117	2.65918	3.4928	3.05783	3.61961	3.32685	3.14338	2.80878	2.73016
21.3333	3.13163	2.82559	3.04107	3.26469	2.15909	3.31532	3.19225	3.04482	3.40496	3.2577	3.47527	2.65747	3.49881	3.06361	3.6254	3.33348	3.14585	2.81585	2.73784
21.6667	3.13636	2.82801	3.04182	3.26784	2.16595	3.31739	3.18975	3.04856	3.40898	3.26923	3.48248	2.66176	3.50102	3.06578	3.62936	3.33547	3.14655	2.81663	2.73905
22	3.13782	2.82801	3.04444	3.27063	2.16859	3.32082	3.19189	3.0508	3.41132	3.27725	3.49001	2.66946	3.49628	3.05892	3.6254	3.32651	3.14127	2.81074	2.73501
22.3333	3.13964	2.82882	3.04594	3.27342	2.16964	3.32014	3.1876	3.05305	3.419	3.29357	3.50632	2.67842	3.49913	3.06289	3.62967	3.33348	3.14479	2.81467	2.74066
22.6667	3.1469	2.82398	3.05043	3.28212	2.17803	3.32082	3.18832	3.05529	3.42101	3.29807	3.50957	2.68183	3.50386	3.06542	3.63332	3.33878	3.14795	2.81624	2.74348
23	3.14327	2.82842	3.04781	3.27864	2.17332	3.3246	3.19439	3.05305	3.41734	3.28664	3.50046	2.67586	3.52869	3.08948	3.63332	3.33481	3.14268	2.82212	2.7257
23.3333	3.14254	2.83084	3.05006	3.28003	2.17384	3.32529	3.19154	3.05454	3.42034	3.29357	3.50697	2.67927	3.49628	3.05856	3.63149	3.3305	3.14374	2.81232	2.73986
23.6667	3.14472	2.83003	3.0508	3.28143	2.17751	3.327	3.19225	3.05492	3.42001	3.29461	3.50957	2.68098	3.50039	3.06181	3.63302	3.33315	3.1462	2.81389	2.74389
24	3.14653	2.83205	3.05155	3.28073	2.17803	3.32597	3.19261	3.05604	3.42234	3.296	3.5112	2.68098	3.50386	3.06361	3.63454	3.33514	3.14549	2.81506	2.74389
24.3333	3.14581	2.83406	3.05118	3.28386	2.17856	3.32632	3.19189	3.05492	3.42267	3.29842	3.51217	2.68183	3.50701	3.0701	3.63788	3.33945	3.14936	2.82095	2.74912
24.6667	3.14653	2.83164	3.05155	3.28282	2.18013	3.32735	3.19082	3.05492	3.42434	3.29946	3.51347	2.68268	3.50764	3.07334	3.63758	3.34011	3.14936	2.81742	2.74952
25	3.14798	2.83366	3.05118	3.28386	2.18013	3.32632	3.19082	3.05417	3.42334	3.30153	3.51412	2.68395	3.5026	3.06	3.63393	3.3305	3.14233	2.8131	2.74389
25.3333	3.14798	2.83366	3.05417	3.28421	2.17908	3.32735	3.1901	3.05342	3.42401	3.30464	3.51542	2.68438	3.50323	3.06072	3.63332	3.32917	3.14268	2.81389	2.74389
25.6667	3.14943	2.83124	3.05193	3.28421	2.18065	3.32392	3.18975	3.05342	3.42467	3.30464	3.51477	2.68395	3.50481	3.06361	3.63758	3.33381	3.14514	2.81703	2.74751
26	3.14871	2.83164	3.05267	3.28386	2.17803	3.32426	3.1901	3.05379	3.42401	3.30464	3.51574	2.68183	3.52806	3.08052	3.63515	3.33149	3.1374	2.82056	2.72894
26.3333	3.14943	2.83325	3.05193	3.28386	2.18013	3.32357	3.18796	3.0523	3.42434	3.30498	3.51607	2.68353	3.49691	3.05313	3.63271	3.32518	3.13775	2.80956	2.74066
26.6667	3.14762	2.83285	3.0523	3.28386	2.17961	3.31979	3.18223	3.05417	3.42767	3.31463	3.52611	2.68862	3.53558	3.08912	3.64092	3.33779	3.14549	2.82682	2.7342
27	3.14726	2.83205	3.0508	3.28421	2.18065	3.31876	3.18115	3.05454	3.42834	3.31636	3.52579	2.6882	3.49786	3.05458	3.63484	3.32651	3.13987	2.81232	2.74107
27.3333	3.14798	2.83245	3.05193	3.28421	2.17751	3.31773	3.17936	3.05379	3.428	3.31601	3.52643	2.68905	3.50512	3.05856	3.6394	3.33282	3.14585	2.81546	2.7459
27.6667	3.14798	2.83245	3.05118	3.28247	2.17803	3.31773	3.18724	3.05006	3.42301	3.30257	3.51509	2.68183	3.5243	3.0737	3.63484	3.32651	3.13352	2.81663	2.72124
28	3.14726	2.83164	3.0523	3.28386	2.17803	3.31498	3.17972	3.05155	3.427	3.31463	3.52579	2.68778	3.49628	3.04733	3.63302	3.32252	3.13634	2.8076	2.73663
28.3333	3.14617	2.83124	3.05043	3.28351	2.17699	3.31395	3.17756	3.05267	3.42634	3.31601	3.52579	2.6882	3.4947	3.04552	3.63058	3.32019	3.13388	2.80641	2.7342
28.6667	3.14581	2.83124	3.05043	3.28282	2.17541	3.31429	3.1772	3.05155	3.42467	3.31636	3.52611	2.6882	3.50039	3.04987	3.63606	3.32751	3.13987	2.80996	2.73945
29	3.14508	2.83124	3.05043	3.28212	2.17751	3.31222	3.17541	3.05155	3.42534	3.31498	3.52676	2.68735	3.50039	3.04806	3.63393	3.32518	3.13846	2.80956	2.73663
29.3333	3.14545	2.83124	3.04968	3.28212	2.17226	3.31188	3.17613	3.05006	3.42434	3.31567	3.52514	2.68862	3.50165	3.05023	3.63484	3.32618	3.13916	2.81114	2.73703
29.6667	3.14436	2.83003	3.05006	3.28177	2.17384	3.31016	3.17505	3.05118	3.42367	3.31463	3.52708	2.6882	3.52368	3.06542	3.63484	3.32219	3.13458	2.81585	2.71798
30	3.14363	2.82882	3.04968	3.28247	2.17436	3.31016	3.18115	3.04706	3.41867	3.30153	3.51509	2.68012	3.4947	3.04443	3.6321	3.32119	3.13388	2.80563	2.73178
30.3333	3.14254	2.82761	3.04893	3.28143	2.17384	3.31016	3.17397	3.04893	3.42267	3.31395	3.52579	2.68778	3.49344	3.04262	3.63119	3.3172	3.13247	2.80523	2.73016
30.6667	3.14254	2.8264	3.04819	3.28177	2.17384	3.3105	3.17972	3.04669	3.417	3.2998	3.51639	2.68012	3.49375	3.04262	3.63119	3.31786	3.13247	2.80405	2.72894
31	3.14218	2.8268	3.04893	3.28177	2.17226	3.30947	3.17577	3.04706	3.41767	3.30395	3.51834	2.68183	3.49944	3.04697	3.63575	3.32352	3.13634	2.81035	2.7342
31.3333	3.14	2.8268	3.04706	3.28212	2.17226	3.30843	3.17073	3.04706	3.41967	3.31326	3.52449	2.68778	3.529	3.0737	3.6394	3.32718	3.1374	2.8233	2.72124
31.6667	3.13891	2.82357	3.04631	3.28003	2.17121	3.30947	3.17756	3.04556	3.41466	3.29807	3.51282	2.68012	3.50165	3.04842	3.63545	3.32452	3.13846	2.8131	2.7342
32	3.13927	2.82276	3.04669	3.28038	2.16911	3.30912	3.17325	3.04594	3.415	3.30084	3.51607	2.68183	3.4909	3.03607	3.63028	3.31453	3.12788	2.80602	2.72813
32.3333	3.13818	2.82236	3.04444	3.28073	2.17226	3.30498	3.16821	3.04556	3.41734	3.3105	3.52417	2.68778	3.49407	3.04007	3.63271	3.31486	3.1307	2.8072	2.72975
32.6667	3.13746	2.82276	3.04482	3.27969	2.17174	3.30705	3.16713	3.04519	3.418	3.30981	3.52514	2.6882	3.49628	3.04153	3.63241	3.31853	3.12894	2.80878	2.72854
33	3.13709	2.82034	3.04294	3.27934	2.17226	3.30774	3.17145	3.04144	3.41199	3.29669	3.51217	2.6797	3.49786	3.04407	3.63484	3.31786	3.13247	2.80996	2.73178
33.3333	3.13673	2.82115	3.04294	3.28003	2.17121	3.30567	3.16893	3.04219	3.41266	3.29911	3.51574	2.68098	3.52838	3.06433	3.63758	3.32319	3.1307	2.8233	2.7192
33.6667	3.13746	2.82034	3.04107	3.27934	2.16964	3.30671	3.16857	3.04069	3.41266	3.29773	3.51477	2.68098	3.49565	3.04371	3.63302	3.31753	3.12858	2.81114	2.73178
34	3.13782	2.82034	3.04107	3.28003	2.16911	3.3036	3.16533	3.04294	3.415	3.30533	3.5219	2.68608	3.49786	3.04407	3.63606	3.31886	3.12858	2.81192	2.73461
34.3333	3.13818	2.81912	3.04107	3.27864	2.16964	3.30464	3.17001	3.03919	3.40931	3.29392	3.51185	2.67757	3.51614	3.05603	3.63393	3.31086	3.12045	2.81546	2.71066
34.6667	3.13746	2.81791	3.03956	3.27899	2.16701	3.3036	3.16425	3.04144	3.41466	3.3074	3.52255	2.68565	3.50228	3.04733	3.63727	3.32053	3.13141	2.81624	2.73461
35	3.13709	2.81791	3.03994	3.27829	2.16648	3.30429	3.16821	3.03769	3.40798	3.29253	3.51055	2.67672	3.52022	3.06181	3.63667	3.3162	3.12292	2.81977	2.71554
35.3333	3.136	2.81629	3.03806	3.27655	2.16385	3.30464	3.16749	3.03694	3.40998	3.29496	3.51282	2.67927	3.49407	3.04044	3.63606	3.3152	3.12717	2.81153	2.73097
35.6667	3.13636	2.8171	3.03881	3.27655	2.16385	3.30118	3.16353	3.03844	3.41333	3.30464	3.52061	2.68523	3.52054	3.06145	3.63727	3.3182	3.12682	2.82173	2.7188
36	3.13527	2.8167	3.03694	3.27446	2.16279	3.30153	3.16209	3.03881	3.41433	3.30636	3.52028	2.68353	3.49533	3.03898	3.63332	3.31153	3.12328	2.80878	2.72692
36.3333	3.13746	2.8167	3.03694	3.27446	2.16174	3.30118	3.16785	3.0328	3.40831	3.29115	3.5099	2.67373	3.513	3.04842	3.63089	3.30752	3.11264	2.81074	2.70739
36.6667	3.13382	2.8167	3.03618	3.27272	2.16015	3.30187	3.16677	3.0328	3.40931	3.29357	3.51217	2.67458	3.49723	3.04298	3.63727	3.3162	3.12788	2.81271	2.73137
37	3.13382	2.81589	3.03543	3.27377	2.16174	3.30049	3.16569	3.03468	3.40864	3.29288	3.51282	2.67501	3.51457	3.05168	3.63241	3.30819	3.11264	2.8131	2.70739
37.3333	3.13345	2.8167	3.03618	3.27272	2.15804	3.29842	3.16209	3.03656	3.41199	3.30498	3.51996	2.68098	3.48583	3.02988	3.63028	3.30652	3.11406	2.80484	2.7188
37.6667	3.13382	2.8167	3.03581	3.27098	2.15486	3.30015	3.16605	3.03205	3.40697	3.28941	3.50925	2.67117	3.49881	3.04298	3.63697	3.31586	3.12788	2.80917	2.72813
38	3.13418	2.81629	3.03393	3.26993	2.15539	3.29842	3.16497	3.03355	3.40831	3.29392	3.51217	2.6733	3.51583	3.0506	3.63484	3.30719	3.11264	2.81192	2.70535
38.3333	3.13455	2.81589	3.03506	3.27133	2.15433	3.29946	3.16461	3.03393	3.4063	3.29288	3.51249	2.6733	3.49154	3.02915	3.63393	3.30819	3.11797	2.80405	2.72124
38.6667	3.13382	2.81589	3.03393	3.27028	2.15221	3.29842	3.16605	3.03355	3.40731	3.29357	3.51087	2.6733	3.48774	3.0306	3.63241	3.30618	3.11371	2.80326	2.71839
39	3.13345	2.81507	3.03393	3.26993	2.15009	3.29738	3.16317	3.03581	3.40965	3.30498	3.51931	2.67927	3.48805	3.03024	3.63241	3.30652	3.11619	2.80484	2.71798
39.3333	3.13236	2.81507	3.03431	3.26819	2.15115	3.29911	3.16785	3.03318	3.40463	3.29011	3.50762	2.66861	3.5196	3.05494	3.63849	3.31253	3.11619	2.81663	2.7078
39.6667	3.13418	2.81507	3.03393	3.26679	2.15009	3.29946	3.16497	3.03393	3.4053	3.29357	3.51022	2.67117	3.49565	3.03571	3.63879	3.3122	3.12186	2.80641	2.72286
40	3.13309	2.81467	3.03205	3.26784	2.15062	3.29703	3.16281	3.03731	3.40965	3.30464	3.51931	2.68055	3.52085	3.0582	3.64274	3.3162	3.12115	2.8186	2.71147
40.3333	3.13382	2.81426	3.0328	3.26609	2.15062	3.29876	3.16713	3.03393	3.40362	3.28837	3.50794	2.66989	3.50007	3.03716	3.64031	3.31353	3.12399	2.80956	2.72489
40.6667	3.13236	2.81507	3.03205	3.26749	2.14797	3.296	3.16281	3.03694	3.40831	3.30498	3.51996	2.68012	3.49944	3.03971	3.64304	3.3152	3.12434	2.80838	2.72529
41	3.13163	2.81467	3.0313	3.26644	2.14956	3.29738	3.16749	3.0328	3.40362	3.28698	3.5086	2.67117	3.52399	3.05964	3.64456	3.3172	3.12222	2.82134	2.71066
41.3333	3.132	2.81305	3.03092	3.26644	2.15062	3.29807	3.16209	3.03656	3.40864	3.30326	3.52028	2.68055	3.48995	3.02623	3.63484	3.30585	3.11406	2.80287	2.71717
41.6667	3.13345	2.81305	3.03092	3.26609	2.14903	3.29842	3.16713	3.03355	3.40463	3.28698	3.50827	2.67117	3.51834	3.04552	3.63879	3.30819	3.113	2.80996	2.7029
42	3.13345	2.81264	3.02979	3.26539	2.14691	3.29738	3.16028	3.03694	3.40798	3.30222	3.51996	2.68098	3.50386	3.0408	3.64486	3.3152	3.12222	2.81192	2.72408
42.3333	3.13418	2.81224	3.02979	3.26609	2.14956	3.29911	3.16749	3.03242	3.40194	3.28455	3.50925	2.67245	3.49375	3.02951	3.63849	3.30685	3.11442	2.80405	2.7192
42.6667	3.13382	2.81142	3.02715	3.26539	2.15062	3.29842	3.16136	3.03656	3.40864	3.30187	3.51931	2.68055	3.52211	3.04951	3.64213	3.31086	3.11193	2.81546	2.70657
43	3.13418	2.81142	3.0264	3.26539	2.15009	3.29842	3.16064	3.03806	3.40931	3.30153	3.51834	2.68055	3.49565	3.0306	3.64213	3.30819	3.11548	2.80641	2.72164
43.3333	3.13309	2.81142	3.02678	3.26609	2.15115	3.29842	3.161	3.03881	3.40931	3.30187	3.51899	2.68098	3.49533	3.02951	3.63818	3.30618	3.11264	2.80563	2.71839
43.6667	3.13345	2.81021	3.02565	3.26644	2.15062	3.30084	3.16677	3.03393	3.40362	3.28421	3.50925	2.67117	3.52462	3.05639	3.64577	3.31353	3.11548	2.8186	2.71106
44	3.13382	2.8098	3.02602	3.26644	2.15168	3.30084	3.16353	3.03355	3.40429	3.28768	3.5112	2.67373	3.50007	3.03352	3.64547	3.31086	3.11726	2.81114	2.72489
44.3333	3.13491	2.8098	3.02451	3.26574	2.15062	3.29911	3.16028	3.03543	3.40864	3.2998	3.52093	2.67885	3.52587	3.05964	3.64759	3.31353	3.11584	2.82212	2.71188
44.6667	3.13891	2.80614	3.0264	3.27133	2.15909	3.2998	3.16064	3.03694	3.40898	3.30084	3.52028	2.6797	3.51803	3.04625	3.64395	3.30551	3.10625	2.80996	2.70371
45	3.13673	2.80899	3.02489	3.26469	2.15062	3.30153	3.16533	3.0313	3.40396	3.28386	3.50925	2.67117	3.50544	3.03825	3.6482	3.31286	3.11797	2.81153	2.7257
45.3333	3.13564	2.81102	3.02451	3.26609	2.15115	3.29911	3.16064	3.03694	3.40898	3.2998	3.52158	2.6797	3.53276	3.06145	3.65183	3.31586	3.11797	2.82291	2.71473
45.6667	3.13527	2.81142	3.023	3.26539	2.15062	3.30049	3.161	3.03656	3.40898	3.30084	3.52125	2.67885	3.50481	3.03753	3.64789	3.31119	3.1169	2.81035	2.72529
46	3.14109	2.80533	3.0264	3.27168	2.15751	3.30222	3.16425	3.0313	3.40329	3.28316	3.51185	2.66989	3.53307	3.06397	3.65395	3.3162	3.11761	2.82408	2.71473
46.3333	3.14254	2.80533	3.02753	3.27202	2.15857	3.30084	3.16028	3.03506	3.40998	3.30084	3.52352	2.67799	3.50796	3.03825	3.65153	3.3122	3.11655	2.81153	2.72732
46.6667	3.13927	2.8094	3.02451	3.26539	2.15115	3.30326	3.16713	3.03054	3.40329	3.28421	3.5112	2.66989	3.53307	3.06469	3.65455	3.31886	3.11974	2.82291	2.71514
47	3.13891	2.81061	3.02527	3.26399	2.15062	3.30291	3.16353	3.03355	3.40329	3.28768	3.51509	2.67117	3.51079	3.04007	3.65395	3.31653	3.1208	2.81271	2.72773
47.3333	3.14073	2.81061	3.02376	3.26609	2.15009	3.30257	3.16064	3.03769	3.40864	3.2998	3.52287	2.67629	3.52399	3.04733	3.65122	3.30585	3.10375	2.81192	2.70371
47.6667	3.14036	2.81061	3.02527	3.26469	2.15115	3.30153	3.16173	3.03806	3.40831	3.30153	3.52255	2.67714	3.51394	3.0408	3.65727	3.31786	3.12186	2.81467	2.72935
48	3.14617	2.80696	3.02828	3.27098	2.15592	3.3036	3.16749	3.03355	3.40228	3.28664	3.51282	2.66946	3.53651	3.06722	3.6606	3.31886	3.11974	2.82016	2.71473

## Sheet: Radius 70s
t (h)	Radius [mm]
3	0.719698	0.654963												0.67644	0.67644	0.72227	0.642931
3.33333	0.855835	0.836964	0.678912	0.73227	0.668753	0.633715			0.640876	0.647957	0.609862			0.818399	0.80065	0.843668	0.864375	0.583451
3.66667	0.9625	0.949371	0.786361	0.876905	0.803583	0.809242	0.656702		0.770237	0.762795	0.73693	0.711728	0.721282	0.93914	0.909242	0.979464	0.988451	0.731394
4	1.05955	1.04872	0.879503	0.993989	0.905075	0.912607	0.786361		0.879503	0.863796	0.839686	0.817657	0.845103	1.05341	1.03006	1.10061	1.12544	0.835771
4.33333	1.1514	1.13443	0.969586	1.09659	0.995136	1.00654	0.887252	0.642653	0.967229	0.950572	0.943343	0.910104	0.932395	1.16974	1.14201	1.24303	1.23142	0.940316
4.66667	1.23367	1.21504	1.06599	1.1942	1.08718	1.0945	0.971936	0.747688	1.05415	1.03889	1.04545	0.998569	1.02562	1.25981	1.2457	1.35124	1.32398	1.01928
5	1.32809	1.30031	1.14743	1.28531	1.17007	1.17785	1.06062	0.836964	1.14045	1.12737	1.13443	1.08087	1.10488	1.37154	1.34304	1.47183	1.4136	1.11359
5.33333	1.41461	1.3828	1.23552	1.3712	1.25021	1.2584	1.14444	0.917594	1.22346	1.2141	1.22532	1.16126	1.18653	1.46505	1.44301	1.57696	1.49492	1.19775
5.66667	1.51131	1.46921	1.32034	1.45986	1.32981	1.34431	1.24013	0.99284	1.30119	1.30206	1.30993	1.24381	1.26743	1.55081	1.53217	1.67088	1.57134	1.28586
6	1.61284	1.56326	1.41783	1.55154	1.41864	1.42506	1.32292	1.0777	1.39512	1.3828	1.38445	1.31601	1.35108	1.6395	1.62392	1.76105	1.65292	1.3667
6.33333	1.70833	1.65611	1.52035	1.64436	1.50526	1.50905	1.41542	1.1593	1.49079	1.4661	1.45359	1.39512	1.44335	1.73194	1.70428	1.84383	1.72747	1.44989
6.66667									1.58285	1.56034	1.54934	1.47695	1.52185	1.82273	1.7804	1.92478	1.7977	1.53361
7	1.88971	1.83083	1.715	1.82834	1.68141	1.66641	1.60361	1.32637	1.67869	1.64921	1.63392	1.55815	1.60788	1.91326	1.86588	2.00576	1.88063	1.60819
7.33333	1.97473	1.90893	1.7994	1.91132	1.76613	1.7401	1.69492	1.40976	1.7822	1.73681	1.70499	1.64505	1.7003	2.00797	1.95328	2.0889	1.96006	1.69778
7.66667	2.05514	1.98568	1.89092	1.98855	1.84696	1.81895	1.78092	1.48235	1.88124	1.82021	1.78796	1.72561	1.78092	2.10156	2.0315	2.16936	2.04235	1.78226
8	2.12823	2.05736	1.9782	2.06234	1.91847	1.89152	1.86968	1.55595	1.97011	1.91728	1.88245	1.80637	1.8519	2.19166	2.11832	2.25235	2.12561	1.8718
8.33333	2.19889	2.12715	2.05514	2.13572	1.99542	1.96314	1.95616	1.62692	2.06234	2.00569	1.96489	1.87455	1.92855	2.26653	2.18712	2.31908	2.19871	1.94136
8.66667	2.26684	2.19161	2.12501	2.20407	2.06455	2.03281	2.04009	1.69761	2.15592	2.09036	2.04289	1.94211	2.00284	2.35642	2.2714	2.40333	2.27383	2.03258
9	2.33771	2.25473	2.19785	2.27237	2.13305	2.10342	2.12017	1.76289	2.24561	2.16121	2.11208	2.01647	2.07448	2.44798	2.35361	2.4785	2.3442	2.11414
9.33333	2.40031	2.3112	2.27488	2.34307	2.20407	2.16859	2.19992	1.83021	2.33429	2.2451	2.18483	2.07558	2.14584	2.54103	2.44663	2.55275	2.41846	2.19921
9.66667	2.46457	2.3697	2.34453	2.40886	2.26785	2.22673	2.27488	1.88971	2.41264	2.32793	2.26231	2.13679	2.20666	2.62616	2.53013	2.62826	2.49317	2.29801
10	2.52132	2.43195	2.415	2.47289	2.32989	2.28689	2.34891	1.94915	2.50088	2.40554	2.33527	2.19941	2.27237	2.67908	2.57774	2.68279	2.54494	2.35126
10.3333	2.58036	2.48532	2.47658	2.53576	2.39174	2.35521	2.42255	2.00796	2.57372	2.47888	2.40838	2.26181	2.3338	2.75354	2.65254	2.75514	2.60333	2.42622
10.6667	2.63851	2.5425	2.55235	2.60763	2.45204	2.41972	2.49859	2.07613	2.65747	2.53891	2.45947	2.32449	2.40174	2.82721	2.72611	2.8276	2.66791	2.5029
11	2.7106	2.61898	2.63158	2.68565	2.53846	2.49722	2.58919	2.15115	2.72571	2.61462	2.53216	2.38314	2.45483	2.89939	2.78507	2.8971	2.73097	2.57859
11.3333	2.76354	2.67544	2.70681	2.7503	2.61025	2.56528	2.66861	2.21903	2.81142	2.69921	2.61331	2.45623	2.52584	2.96908	2.86179	2.95751	2.79536	2.65504
11.6667	2.8094	2.7211	2.75775	2.79841	2.66989	2.61985	2.73031	2.26735	2.90405	2.77014	2.67927	2.52494	2.60763	3.02001	2.90891	3.00423	2.84242	2.70862
12	2.85172	2.76354	2.80858	2.84972	2.71733	2.66861	2.78902	2.31466	2.96239	2.8413	2.75278	2.57549	2.6579	3.11371	3.00386	3.09091	2.91725	2.79576
12.3333	2.89421	2.80533	2.85292	2.89263	2.76478	2.71354	2.8429	2.35036	3.03092	2.88354	2.7927	2.63332	2.72278	3.19327	3.08733	3.17661	2.9917	2.88027
12.6667	2.92713	2.8417	2.9009	2.9322	2.80899	2.75692	2.89224	2.38936	3.07984	2.93841	2.85731	2.67373	2.75982	3.24954	3.1307	3.22701	3.03243	2.93839
13	2.96008	2.87522	2.93803	2.97546	2.85132	2.79922	2.93686	2.42914	3.14291	2.98235	2.89972	2.71565	2.81183	3.31786	3.19569	3.28539	3.08231	3.01268
13.3333	2.99571	2.90954	2.98044	3.00521	2.88552	2.83527	2.98273	2.46689	3.18438	3.02414	2.94191	2.75195	2.85412	3.36056	3.23317	3.3172	3.12115	3.04371
13.6667	3.02753	2.94346	3.01696	3.04257	2.92518	2.87125	3.02414	2.50088	3.23168	3.06163	2.9812	2.79515	2.89854	3.40077	3.26684	3.35529	3.15251	3.07837
14	3.05454	2.97469	3.0523	3.07947	2.96624	2.90483	3.07279	2.5299	3.27969	3.09499	3.00749	2.83164	2.94927	3.46548	3.32119	3.41342	3.20467	3.14233
14.3333	3.08206	2.99989	3.08428	3.10382	2.99609	2.93841	3.10786	2.56573	3.3167	3.13345	3.05939	2.86966	2.9812	3.49122	3.34672	3.44405	3.22564	3.17069
14.6667	3.113	3.02866	3.11849	3.13636	3.02941	2.96701	3.14798	2.59095	3.3618	3.16641	3.08206	2.90011	3.02451	3.53651	3.38775	3.48012	3.26006	3.21844
15	3.13746	3.04706	3.14436	3.15956	3.05827	2.99875	3.17864	2.61549	3.39892	3.209	3.12507	2.93686	3.0523	3.5732	3.41989	3.51174	3.29278	3.25633
15.3333	3.16353	3.07168	3.17253	3.18223	3.07947	3.02791	3.21682	2.6411	3.44063	3.23521	3.15088	2.96393	3.10235	3.61196	3.45046	3.54432	3.32452	3.28707
15.6667	3.18008	3.09056	3.19511	3.20473	3.10456	3.04893	3.24542	2.65833	3.47789	3.26993	3.18079	2.99342	3.13964	3.6488	3.48678	3.57846	3.3487	3.32651
16	3.19975	3.10713	3.21327	3.22213	3.12726	3.07613	3.27516	2.6797	3.51477	3.30118	3.21043	3.02451	3.17505	3.67596	3.51677	3.60768	3.38481	3.35299
16.3333	3.21611	3.11959	3.2345	3.23485	3.14327	3.09388	3.30118	2.69498	3.54676	3.33043	3.24647	3.0523	3.19618	3.7068	3.54307	3.63818	3.40337	3.37827
16.6667	3.22921	3.13455	3.25104	3.25033	3.1545	3.11336	3.32666	2.70512	3.58133	3.355	3.26539	3.07353	3.23556	3.73679	3.57351	3.66572	3.4328	3.40921
17	3.24084	3.14581	3.26469	3.2619	3.17145	3.12762	3.3482	2.72068	3.61052	3.38412	3.29426	3.09609	3.26784	3.78265	3.61411	3.70591	3.46644	3.44982
17.3333	3.24963	3.15595	3.27551	3.27342	3.1833	3.13964	3.36926	2.73073	3.63508	3.41032	3.32597	3.12397	3.28872	3.8048	3.62845	3.72524	3.47885	3.47154
17.6667	3.25524	3.16497	3.2849	3.28559	3.19118	3.15269	3.38648	2.73866	3.66353	3.43366	3.3482	3.14218	3.3136	3.82681	3.6488	3.74654	3.49786	3.48583
18	3.2619	3.17109	3.29426	3.29496	3.19654	3.161	3.40429	2.7449	3.69269	3.44924	3.36417	3.15667	3.34956	3.85873	3.67175	3.76743	3.51803	3.51111
18.3333	3.27098	3.17649	3.30153	3.29876	3.20509	3.17397	3.42067	2.75195	3.71425	3.47133	3.38783	3.17649	3.36655	3.89381	3.70173	3.79578	3.53901	3.54463
18.6667	3.27551	3.18187	3.30912	3.30498	3.20758	3.18223	3.43498	2.75941	3.73875	3.48445	3.4053	3.19368	3.39288	3.91701	3.72079	3.81669	3.56236	3.56205
19	3.28351	3.18581	3.31326	3.30567	3.21043	3.18545	3.44824	2.76271	3.7561	3.4985	3.42267	3.20438	3.416	3.93447	3.73384	3.82912	3.57722	3.57382
19.3333	3.26015	3.17972	3.30291	3.30809	3.21469	3.19546	3.46968	2.76601	3.77307	3.51217	3.43996	3.21823	3.4393	3.95855	3.75303	3.84209	3.59171	3.59325
19.6667	3.29807	3.19082	3.32735	3.31773	3.21752	3.19261	3.46574	2.76808	3.78997	3.52482	3.45122	3.23026	3.45717	3.96887	3.75626	3.84841	3.59263	3.59909
20	3.29392	3.18975	3.32357	3.31601	3.21965	3.2001	3.48085	2.76808	3.80439	3.53838	3.46837	3.2412	3.46541	3.98776	3.77534	3.86532	3.60737	3.61686
20.3333	3.29565	3.19261	3.3246	3.32048	3.22142	3.20153	3.48838	2.77014	3.81995	3.54451	3.47625	3.24998	3.48576	4.00629	3.78791	3.87588	3.62113	3.63058
20.6667	3.29911	3.19475	3.32529	3.32323	3.22355	3.20402	3.49556	2.76972	3.83069	3.55158	3.48936	3.25524	3.50013	4.0129	3.78791	3.8793	3.61716	3.63271
21	3.30049	3.19654	3.327	3.32357	3.22602	3.20616	3.49883	2.77219	3.83723	3.56152	3.49883	3.2605	3.50567	4.02692	3.80014	3.89011	3.62754	3.64304
21.3333	3.30187	3.19511	3.327	3.32494	3.22673	3.20794	3.50502	2.77178	3.8497	3.56345	3.50274	3.26644	3.52287	4.03844	3.80857	3.90316	3.63515	3.65364
21.6667	3.30187	3.19654	3.32872	3.3246	3.22638	3.20971	3.50729	2.77343	3.85888	3.5708	3.51217	3.27168	3.53161	4.04309	3.81205	3.90939	3.63818	3.6609
22	3.30257	3.19582	3.32803	3.32494	3.22814	3.21043	3.51022	2.77425	3.86597	3.57591	3.51801	3.27481	3.54418	4.04937	3.8135	3.90995	3.63667	3.66271
22.3333	3.30464	3.19475	3.32837	3.32769	3.2285	3.2122	3.51444	2.77384	3.86921	3.58801	3.52805	3.27969	3.54547	4.05836	3.82276	3.91729	3.64152	3.66753
22.6667	3.2776	3.18509	3.31291	3.32289	3.23062	3.21575	3.5232	2.77631	3.87775	3.59373	3.5329	3.28455	3.55158	4.06707	3.83056	3.92631	3.6485	3.67566
23	3.3167	3.19725	3.33556	3.33043	3.23026	3.21114	3.51639	2.77507	3.88451	3.59214	3.53354	3.29184	3.56313	4.07359	3.83402	3.93222	3.64668	3.68797
23.3333	3.3036	3.19475	3.32769	3.32666	3.22779	3.21327	3.51996	2.77384	3.89214	3.59786	3.54032	3.2953	3.56792	4.08145	3.84352	3.93727	3.6612	3.69126
23.6667	3.30049	3.19154	3.32632	3.32632	3.22814	3.21291	3.5219	2.77343	3.89771	3.60134	3.54354	3.29876	3.5724	4.07847	3.83748	3.93138	3.64698	3.68497
24	3.3036	3.19118	3.32597	3.32426	3.22779	3.21256	3.5232	2.77343	3.90064	3.60609	3.5474	3.30153	3.57655	4.08118	3.8395	3.9339	3.6485	3.68887
24.3333	3.29876	3.18975	3.32392	3.32494	3.22673	3.21398	3.52417	2.77137	3.90648	3.60641	3.55126	3.30395	3.58069	4.09227	3.84726	3.94036	3.6609	3.69755
24.6667	3.29842	3.1876	3.32151	3.32323	3.22638	3.21149	3.52676	2.77219	3.90911	3.60894	3.55383	3.3074	3.58579	4.0947	3.84956	3.94064	3.65909	3.69994
25	3.29669	3.18724	3.32117	3.32323	3.22532	3.21256	3.52611	2.7689	3.91436	3.60989	3.55447	3.30843	3.59056	4.09281	3.84554	3.93812	3.65153	3.69605
25.3333	3.29496	3.18724	3.31773	3.32082	3.2239	3.21185	3.52611	2.7689	3.91552	3.61368	3.55672	3.30947	3.5931	4.10548	3.8573	3.95157	3.66753	3.70889
25.6667	3.29115	3.18545	3.3167	3.31945	3.22461	3.21149	3.52708	2.7656	3.91785	3.61368	3.56024	3.3105	3.59595	4.09955	3.85271	3.94681	3.65818	3.70501
26	3.28907	3.18438	3.31119	3.31876	3.22319	3.21114	3.5274	2.76478	3.92106	3.61494	3.5596	3.31222	3.59754	4.11543	3.8676	3.96357	3.67325	3.72227
26.3333	3.28421	3.1833	3.30809	3.31773	3.22142	3.20936	3.52773	2.76147	3.92338	3.6162	3.56184	3.31257	3.59944	4.1079	3.85845	3.95436	3.66422	3.71425
26.6667	3.28559	3.18151	3.30912	3.31636	3.22071	3.20758	3.52805	2.7623	3.92135	3.6203	3.56729	3.31119	3.59564	4.11059	3.86017	3.95632	3.6612	3.71901
27	3.28247	3.18079	3.30498	3.31532	3.22107	3.20687	3.52805	2.75941	3.9228	3.62251	3.56697	3.3105	3.59754	4.11113	3.86274	3.95408	3.66361	3.71574
27.3333	3.27969	3.17828	3.30118	3.3136	3.21752	3.20758	3.52676	2.75692	3.92367	3.62156	3.56665	3.31119	3.59627	4.10682	3.85616	3.94933	3.65818	3.71216
27.6667	3.27551	3.17613	3.30222	3.3105	3.21788	3.20509	3.52708	2.75692	3.92861	3.61683	3.56281	3.31429	3.60419	4.11757	3.87046	3.96525	3.66693	3.72494
28	3.27272	3.17577	3.2998	3.30809	3.21682	3.20545	3.52708	2.75361	3.92687	3.61904	3.56888	3.30981	3.59913	4.11382	3.86331	3.9552	3.6618	3.71514
28.3333	3.27063	3.17433	3.29876	3.3074	3.21575	3.20402	3.5274	2.75403	3.92658	3.62125	3.56888	3.31085	3.59976	4.11247	3.86017	3.95101	3.65818	3.71484
28.6667	3.26469	3.16893	3.29634	3.30567	3.21398	3.20402	3.52676	2.7532	3.9289	3.61999	3.5692	3.3105	3.60071	4.10736	3.85501	3.94457	3.65001	3.71216
29	3.26225	3.17073	3.2953	3.30567	3.21362	3.20224	3.52708	2.75278	3.9289	3.61967	3.56952	3.31154	3.60071	4.11811	3.86617	3.95799	3.66301	3.71871
29.3333	3.26155	3.16785	3.29357	3.3036	3.21185	3.2026	3.52708	2.75237	3.92919	3.61967	3.57048	3.31154	3.60198	4.11999	3.86789	3.96106	3.66512	3.72198
29.6667	3.26015	3.16785	3.29357	3.3036	3.21007	3.20295	3.52514	2.75195	3.93007	3.61904	3.57176	3.30981	3.60229	4.12267	3.87075	3.96497	3.66542	3.72821
30	3.2577	3.16461	3.29149	3.30187	3.20971	3.20082	3.52579	2.7503	3.93471	3.61147	3.56473	3.31222	3.61115	4.11892	3.86274	3.95352	3.65788	3.71693
30.3333	3.2563	3.16461	3.29219	3.30084	3.21078	3.20153	3.52579	2.7503	3.93152	3.61652	3.56952	3.31085	3.60419	4.11516	3.85902	3.94905	3.65304	3.71514
30.6667	3.25279	3.16389	3.29011	3.30291	3.209	3.19903	3.52676	2.75071	3.93616	3.60894	3.56505	3.31257	3.6102	4.11731	3.86102	3.9524	3.65395	3.71722
31	3.25174	3.16389	3.28941	3.2998	3.20936	3.19796	3.52643	2.74905	3.93761	3.60925	3.56633	3.31154	3.61273	4.11328	3.85587	3.94569	3.64456	3.71365
31.3333	3.25139	3.161	3.28837	3.29911	3.20936	3.19796	3.52417	2.74864	3.93297	3.61305	3.56888	3.3105	3.60514	4.11811	3.85931	3.95073	3.6491	3.7196
31.6667	3.25033	3.16136	3.28664	3.2998	3.20971	3.19796	3.52417	2.74864	3.93587	3.60673	3.56441	3.31188	3.61147	4.11301	3.85644	3.94345	3.64426	3.71306
32	3.24998	3.15956	3.28421	3.29773	3.20936	3.19725	3.52449	2.7478	3.93876	3.60673	3.56633	3.31188	3.61241	4.11838	3.85988	3.95017	3.65001	3.71663
32.3333	3.24717	3.15848	3.28421	3.29842	3.20794	3.19618	3.52482	2.7478	3.93413	3.61052	3.56888	3.3105	3.60767	4.12133	3.86074	3.95129	3.65122	3.7193
32.6667	3.24577	3.15739	3.28455	3.29773	3.20651	3.19618	3.52449	2.74739	3.93297	3.60989	3.5692	3.30947	3.60831	4.12187	3.8616	3.95408	3.65213	3.72168
33	3.24682	3.15703	3.28386	3.29773	3.209	3.19511	3.52384	2.74531	3.93761	3.60419	3.56441	3.30981	3.61305	4.11301	3.85444	3.94092	3.64001	3.71097
33.3333	3.24471	3.15739	3.28316	3.29669	3.20794	3.19546	3.52449	2.74531	3.93876	3.60451	3.56569	3.3105	3.61336	4.11677	3.8573	3.94681	3.64213	3.71901
33.6667	3.24331	3.15378	3.28525	3.29634	3.20545	3.19511	3.5232	2.74531	3.9379	3.60419	3.56441	3.31085	3.61368	4.12106	3.8616	3.9524	3.64971	3.71901
34	3.24331	3.15305	3.28212	3.29634	3.20651	3.19261	3.52287	2.74448	3.93326	3.60578	3.56792	3.30774	3.60704	4.12374	3.86303	3.95436	3.64971	3.72079
34.3333	3.24225	3.15161	3.28038	3.29565	3.20545	3.19296	3.52352	2.74323	3.93761	3.60039	3.56313	3.30843	3.61241	4.12348	3.86017	3.95045	3.64365	3.72346
34.6667	3.24084	3.15124	3.28143	3.29703	3.20509	3.19261	3.52352	2.74199	3.93268	3.60324	3.56761	3.30671	3.60609	4.11408	3.85444	3.94148	3.6397	3.71246
35	3.23943	3.15124	3.28108	3.296	3.20723	3.19154	3.52417	2.74323	3.93848	3.59849	3.56216	3.3074	3.61305	4.12749	3.86646	3.95632	3.65001	3.72939
35.3333	3.23873	3.15052	3.27934	3.29461	3.20651	3.19225	3.52352	2.74157	3.93761	3.59913	3.56313	3.30774	3.61241	4.11032	3.85243	3.93503	3.63454	3.70978
35.6667	3.24084	3.14907	3.27969	3.296	3.20723	3.19118	3.52384	2.7424	3.93326	3.60071	3.56633	3.30602	3.60483	4.11784	3.85616	3.94625	3.63697	3.7199
36	3.23873	3.1498	3.28038	3.29565	3.20651	3.19154	3.52482	2.7424	3.93297	3.60071	3.56569	3.30464	3.60546	4.11972	3.85787	3.94681	3.64243	3.71782
36.3333	3.23732	3.14943	3.27864	3.2953	3.20651	3.19225	3.52449	2.7399	3.93732	3.59405	3.56152	3.30671	3.61241	4.11811	3.85673	3.94709	3.63758	3.72079
36.6667	3.23732	3.14907	3.27969	3.29461	3.20687	3.19118	3.52352	2.74074	3.9379	3.59468	3.56152	3.30705	3.61178	4.11328	3.85271	3.93643	3.63667	3.71187
37	3.23662	3.14871	3.27795	3.29496	3.20651	3.19046	3.52546	2.73907	3.9379	3.59341	3.56152	3.30498	3.61147	4.12053	3.85902	3.94485	3.63818	3.72168
37.3333	3.23732	3.14835	3.27864	3.29392	3.20651	3.19082	3.52482	2.7399	3.93384	3.59754	3.56377	3.30291	3.60261	4.11516	3.8553	3.93868	3.63606	3.71365
37.6667	3.23556	3.14762	3.27795	3.29392	3.20651	3.19154	3.52546	2.74032	3.93732	3.59119	3.55864	3.30498	3.61083	4.11193	3.84898	3.9339	3.63302	3.71008
38	3.23732	3.14835	3.2776	3.29426	3.20723	3.19189	3.52643	2.73741	3.93761	3.59119	3.56024	3.30326	3.61115	4.12079	3.85873	3.94401	3.63697	3.72257
38.3333	3.23626	3.14943	3.27621	3.29288	3.20794	3.19046	3.52546	2.73782	3.93819	3.59024	3.56024	3.30326	3.61115	4.11945	3.85845	3.94008	3.64001	3.71663
38.6667	3.23485	3.14835	3.27516	3.29253	3.20509	3.19082	3.52611	2.73657	3.93905	3.58992	3.56024	3.30257	3.61115	4.11489	3.85099	3.93559	3.63636	3.71276
39	3.23521	3.14653	3.27516	3.29115	3.20687	3.19118	3.5274	2.73741	3.93558	3.59341	3.56088	3.30187	3.60293	4.11462	3.85271	3.93699	3.63575	3.71306
39.3333	3.23591	3.14835	3.27551	3.29184	3.20616	3.19118	3.52708	2.73657	3.93876	3.58865	3.55704	3.30187	3.60957	4.12321	3.86246	3.94597	3.64213	3.72613
39.6667	3.23485	3.14907	3.27551	3.29323	3.20794	3.19189	3.52805	2.73866	3.94021	3.59024	3.55896	3.30187	3.61083	4.11059	3.84496	3.93109	3.62906	3.7071
40	3.23662	3.15088	3.27586	3.2908	3.20758	3.19082	3.52805	2.73699	3.93529	3.59214	3.56088	3.30049	3.60198	4.11543	3.853	3.93615	3.63241	3.71752
40.3333	3.2345	3.14943	3.27446	3.29011	3.20723	3.19225	3.52773	2.73741	3.93963	3.58738	3.55736	3.30153	3.60894	4.11193	3.84956	3.93222	3.63302	3.70948
40.6667	3.23485	3.15016	3.27342	3.29149	3.20651	3.19154	3.52934	2.73824	3.93819	3.59119	3.55992	3.29946	3.60356	4.11301	3.84984	3.93362	3.63454	3.70948
41	3.23521	3.14907	3.27342	3.29219	3.20723	3.19154	3.52934	2.73699	3.93905	3.58642	3.55768	3.30118	3.60957	4.11704	3.85243	3.93503	3.63058	3.71663
41.3333	3.23309	3.14943	3.27342	3.29149	3.20758	3.19118	3.53031	2.73741	3.93732	3.5896	3.5612	3.29876	3.60419	4.11543	3.853	3.93503	3.63606	3.71365
41.6667	3.23274	3.14907	3.27307	3.29045	3.20794	3.19118	3.53031	2.73741	3.93934	3.58515	3.55736	3.30291	3.60957	4.11999	3.85931	3.93896	3.63484	3.72079
42	3.23344	3.15016	3.27307	3.29184	3.20723	3.19118	3.53128	2.73782	3.93616	3.58897	3.56152	3.2998	3.60451	4.11167	3.84697	3.93194	3.63028	3.70859
42.3333	3.23274	3.14798	3.27412	3.29149	3.20616	3.19082	3.53096	2.73866	3.93876	3.58547	3.558	3.30049	3.6102	4.11731	3.85472	3.93699	3.63818	3.71365
42.6667	3.23379	3.1498	3.27412	3.29253	3.20865	3.19046	3.53128	2.73949	3.93703	3.58865	3.5612	3.2998	3.60324	4.12133	3.86017	3.94288	3.63849	3.72287
43	3.23379	3.15052	3.27307	3.29219	3.20936	3.1901	3.53387	2.73866	3.93674	3.58833	3.56056	3.30015	3.60546	4.10978	3.84151	3.92969	3.6251	3.70501
43.3333	3.23344	3.14762	3.27446	3.29253	3.21007	3.1901	3.53451	2.73866	3.93703	3.58833	3.56184	3.2998	3.60578	4.11489	3.85271	3.93531	3.63362	3.71157
43.6667	3.23238	3.14871	3.27446	3.29357	3.20971	3.19046	3.53613	2.73824	3.9405	3.58451	3.558	3.30326	3.61052	4.11328	3.84726	3.93615	3.62479	3.71336
44	3.23026	3.14762	3.27202	3.29219	3.20971	3.19154	3.53613	2.7399	3.94021	3.58388	3.55896	3.30084	3.6102	4.11167	3.84467	3.93053	3.62662	3.70501
44.3333	3.23132	3.14835	3.27481	3.29288	3.20936	3.1901	3.53709	2.74074	3.93645	3.58706	3.56088	3.2998	3.60514	4.11677	3.85013	3.93475	3.62601	3.71306
44.6667	3.20402	3.13818	3.25945	3.29115	3.2122	3.19725	3.54322	2.74115	3.93703	3.58801	3.5612	3.30049	3.60483	4.11731	3.85587	3.94036	3.6318	3.71841
45	3.23521	3.15088	3.28038	3.296	3.21185	3.19118	3.53548	2.74074	3.93992	3.58324	3.55736	3.30153	3.6102	4.11247	3.84755	3.93222	3.62936	3.7074
45.3333	3.23274	3.14653	3.27621	3.29357	3.21185	3.19082	3.53871	2.7399	3.9379	3.58642	3.55992	3.29946	3.60546	4.11677	3.853	3.93756	3.62936	3.71633
45.6667	3.23132	3.14835	3.27551	3.29357	3.21149	3.19332	3.53871	2.73907	3.93674	3.58674	3.5612	3.29911	3.60514	4.11059	3.84352	3.92969	3.62479	3.70531
46	3.2058	3.13855	3.2591	3.29253	3.21433	3.19903	3.54418	2.73907	3.94108	3.5826	3.55672	3.30153	3.6102	4.11757	3.85386	3.93812	3.63119	3.71574
46.3333	3.20438	3.13636	3.2605	3.29045	3.21504	3.19903	3.54644	2.74032	3.93848	3.58611	3.55992	3.29807	3.60673	4.11167	3.84611	3.93025	3.62571	3.70591
46.6667	3.23732	3.15233	3.28212	3.29634	3.21504	3.19439	3.53903	2.73866	3.94253	3.58356	3.55575	3.30153	3.61178	4.11677	3.85415	3.93896	3.63149	3.71722
47	3.23026	3.14835	3.27516	3.29392	3.21504	3.19618	3.54129	2.73907	3.9434	3.58451	3.55704	3.30118	3.61147	4.11489	3.85271	3.93615	3.6318	3.71187
47.3333	3.23168	3.14762	3.27446	3.29392	3.21504	3.19618	3.5429	2.73782	3.93905	3.58642	3.5596	3.29807	3.60609	4.11945	3.85673	3.94092	3.63302	3.7193
47.6667	3.23203	3.14907	3.2769	3.29461	3.21611	3.19725	3.5429	2.73866	3.93992	3.58547	3.55992	3.29946	3.60578	4.11811	3.853	3.93699	3.63393	3.71365
48	3.2058	3.13709	3.25805	3.29219	3.21752	3.2026	3.54837	2.73866	3.94455	3.5826	3.55672	3.30153	3.61178	4.12026	3.85587	3.9412	3.63119	3.7196

## Sheet: Radius 80s
t (h)	Radius [mm]
2.66667															0.659898	0.603929
3															0.859245	0.821096	0.639484
3.33333	0.630104	0.642653						0.567214	0.673851	0.573217					1.00618	0.971533	0.899465	0.68456	0.625505	0.763916
3.66667	0.755279	0.884677	0.841043	0.672156	0.73538	0.700417		0.771716	0.819051	0.73227	0.832864	0.642653	0.670457		1.13034	1.09457	1.04074	0.868202	0.882095	0.964684	0.965829
4	0.853165	0.987078	0.949371	0.795019	0.91635	0.832864		0.898751	0.929945	0.841043	0.957746	0.76578	0.776139	0.660168	1.23858	1.20144	1.15165	1.01275	1.05025	1.13619	1.1116
4.33333	0.951772	1.07875	1.04981	0.903814	1.03228	0.944552		0.991691	1.03006	0.934839	1.05847	0.862475	0.86775	0.753767	1.34879	1.30124	1.24924	1.13521	1.19775	1.25806	1.21425
4.66667	1.04655	1.15239	1.13844	0.995136	1.15239	1.04545	0.651469	1.06919	1.12534	1.02005	1.13945	0.945759	0.956554	0.841043	1.44836	1.39946	1.34222	1.24836	1.32063	1.36508	1.30548
5	1.1304	1.2309	1.23275	1.07664	1.25112	1.14344	0.743096	1.1514	1.22066	1.11003	1.22439	1.02451	1.03889	0.925024	1.54867	1.49566	1.43379	1.34879	1.42683	1.46279	1.3963
5.33333	1.2141	1.32034	1.31861	1.15634	1.3477	1.22718	0.831493	1.22904	1.30644	1.19706	1.30644	1.10385	1.12939	0.995136	1.64084	1.59022	1.52421	1.44607	1.51548	1.55934	1.47857
5.66667	1.29415	1.40571	1.40002	1.23367	1.43225	1.30731	0.915104	1.31861	1.39594	1.28353	1.3861	1.17688	1.20845	1.08403	1.74022	1.68275	1.61573	1.53217	1.60544	1.64958	1.56217
6	1.38527	1.49385	1.49309	1.31254	1.53825	1.38856	0.990539	1.40896	1.47541	1.37535	1.46532	1.2593	1.28531	1.15733	1.83663	1.77294	1.70752	1.628	1.70039	1.74022	1.65426
6.33333	1.48312	1.58932	1.58501	1.38939	1.63462	1.47154	1.06706	1.49385	1.57779	1.47541	1.54639	1.34261	1.3662	1.23829	1.93566	1.86884	1.81179	1.72555	1.79524	1.83	1.74276
6.66667								1.58285	1.66778	1.56253	1.62482	1.43304	1.45202	1.31514	2.03747	1.95724	1.91037	1.81483	1.88533	1.92248	1.82939
7	1.66847	1.76935	1.75965	1.54639	1.82334	1.63392	1.22811	1.66778	1.76419	1.65955	1.70633	1.51584	1.53528	1.39267	2.1427	2.06656	2.00852	1.90283	1.97298	2.01236	1.91557
7.33333	1.75836	1.85805	1.8482	1.62972	1.92203	1.71234	1.30905	1.74795	1.85313	1.74925	1.78412	1.59648	1.62341	1.48158	2.23807	2.16273	2.10314	1.98805	2.05852	2.10156	2.00576
7.66667	1.83891	1.94446	1.92973	1.70365	2.0125	1.78668	1.39103	1.82459	1.93623	1.85313	1.86418	1.68615	1.70566	1.55961	2.32954	2.25431	2.20022	2.07935	2.14631	2.19217	2.09313
8	1.92559	2.01816	2.00796	1.7822	2.0969	1.86907	1.47618	1.89754	2.02437	1.93858	1.94329	1.77129	1.78476	1.64505	2.41617	2.3409	2.28837	2.16375	2.2242	2.27869	2.178
8.33333	2.00512	2.10559	2.0838	1.86173	2.1817	1.95032	1.55815	1.97242	2.1083	2.02606	2.01647	1.85866	1.86846	1.73221	2.50246	2.42074	2.37278	2.24202	2.30233	2.35549	2.25872
8.66667	2.0838	2.17961	2.15804	1.93917	2.26382	2.02155	1.64297	2.04009	2.19057	2.10992	2.08216	1.93505	1.94915	1.81204	2.58459	2.50025	2.45249	2.32384	2.37837	2.43168	2.33617
9	2.16174	2.26231	2.23542	2.0108	2.33868	2.09853	1.72296	2.10938	2.27036	2.18953	2.1485	2.02268	2.02381	1.89272	2.66791	2.58459	2.53275	2.40563	2.44708	2.51172	2.41297
9.33333	2.2344	2.33966	2.30428	2.0849	2.41406	2.16964	1.81015	2.16911	2.34793	2.26533	2.21852	2.09745	2.09853	1.97877	2.74509	2.66543	2.61266	2.48518	2.5148	2.5863	2.49671
9.66667	2.30527	2.4098	2.37162	2.15804	2.48669	2.24052	1.88487	2.2344	2.41925	2.34161	2.28439	2.17699	2.17384	2.05069	2.82095	2.74791	2.68814	2.56312	2.58715	2.65587	2.56915
10	2.38075	2.48302	2.43991	2.23082	2.56261	2.31022	1.95791	2.29684	2.49036	2.41453	2.3523	2.25625	2.25017	2.12501	2.89825	2.82291	2.76195	2.64169	2.65837	2.73137	2.64001
10.3333	2.45111	2.55369	2.51044	2.29635	2.63158	2.37835	2.03225	2.36343	2.55369	2.48853	2.41264	2.32793	2.31761	2.19421	2.97354	2.89596	2.8358	2.71554	2.7257	2.80405	2.71595
10.6667	2.51996	2.62898	2.57505	2.36633	2.70301	2.44832	2.10667	2.42349	2.62203	2.55994	2.47566	2.39746	2.37739	2.26332	3.03789	2.95901	2.9051	2.78745	2.79141	2.87181	2.78705
11	2.59183	2.71018	2.65059	2.43711	2.77631	2.5186	2.18379	2.48348	2.68565	2.63158	2.53576	2.4692	2.44738	2.33135	3.14233	3.06325	3.00055	2.8864	2.87335	2.96274	2.87797
11.3333	2.66561	2.79106	2.72194	2.51362	2.85532	2.59667	2.25524	2.55949	2.76601	2.71649	2.60237	2.55191	2.5299	2.40601	3.23351	3.14865	3.07909	2.97577	2.95377	3.03571	2.96237
11.6667	2.74032	2.87046	2.79433	2.58963	2.93025	2.67117	2.32989	2.6229	2.83446	2.79147	2.66561	2.6242	2.59447	2.47658	3.29413	3.215	3.14339	3.0408	3.01452	3.09877	3.0306
12	2.8037	2.94036	2.8609	2.64801	2.99799	2.7349	2.39508	2.67927	2.89697	2.85651	2.72487	2.68565	2.65532	2.53711	3.35134	3.26514	3.19811	3.10126	3.06974	3.16057	3.09341
12.3333	2.85571	3.00104	2.90954	2.70765	3.06163	2.79596	2.44272	2.72989	2.9512	2.90758	2.77672	2.73407	2.71144	2.5861	3.40142	3.31086	3.25022	3.14971	3.12611	3.21156	3.14971
12.6667	2.90719	3.04856	2.95892	2.76312	3.11116	2.84411	2.49128	2.76931	2.99951	2.96277	2.82317	2.78041	2.76312	2.63808	3.44565	3.35101	3.30284	3.20053	3.17696	3.26514	3.19535
13	2.95275	3.0983	2.99951	2.81791	3.15992	2.89263	2.53531	2.81264	3.05043	3.0128	2.86489	2.82478	2.81142	2.68098	3.48869	3.39459	3.35002	3.25056	3.22187	3.30785	3.25192
13.3333	2.99533	3.14145	3.03994	2.86807	3.20473	2.94462	2.57505	2.85132	3.09793	3.05678	2.90562	2.86529	2.85172	2.72278	3.5265	3.43859	3.39199	3.29144	3.2736	3.35002	3.29513
13.6667	3.03694	3.18043	3.08206	2.91659	3.24823	2.98846	2.61113	2.89224	3.13927	3.09535	2.94191	2.90287	2.89578	2.75899	3.56484	3.47504	3.43473	3.33514	3.3162	3.39199	3.34375
14	3.07353	3.22142	3.11959	2.96316	3.28941	3.03092	2.64887	2.9244	3.18259	3.13891	2.97967	2.94307	2.93764	2.79841	3.60492	3.513	3.4779	3.37664	3.35826	3.43119	3.38579
14.3333	3.11226	3.2591	3.15233	3.00142	3.33009	3.0739	2.6848	2.96085	3.22142	3.179	3.01393	2.97661	2.97661	2.83366	3.64001	3.5493	3.51268	3.41569	3.3998	3.4709	3.42829
14.6667	3.1469	3.29288	3.19118	3.04594	3.37061	3.11593	2.71691	2.99228	3.2577	3.21823	3.04444	3.01166	3.01015	2.86489	3.68077	3.58494	3.54961	3.45782	3.43602	3.50859	3.47026
15	3.1833	3.32872	3.21894	3.08206	3.4053	3.15124	2.7449	3.02376	3.29738	3.2556	3.07798	3.04069	3.04519	2.89854	3.71901	3.619	3.58648	3.49375	3.47504	3.5465	3.50544
15.3333	3.21327	3.35942	3.25104	3.12616	3.44295	3.18617	2.77343	3.05566	3.3342	3.2908	3.1108	3.0713	3.0765	2.93297	3.75509	3.64607	3.61991	3.52994	3.51488	3.57938	3.54338
15.6667	3.24506	3.39019	3.28003	3.16136	3.47888	3.22249	2.80289	3.08908	3.36519	3.32735	3.13818	3.10161	3.1108	2.96085	3.78441	3.67807	3.65213	3.56453	3.54806	3.61686	3.58031
16	3.27412	3.41967	3.30257	3.20473	3.51736	3.25805	2.8268	3.11556	3.3959	3.35602	3.161	3.12653	3.14036	2.98732	3.81669	3.70412	3.68317	3.5997	3.57691	3.64607	3.61411
16.3333	3.29946	3.44394	3.33214	3.23908	3.55029	3.28594	2.84691	3.14363	3.42634	3.38783	3.1901	3.15559	3.16605	3.01545	3.84554	3.72435	3.70889	3.62693	3.60921	3.67476	3.64304
16.6667	3.32392	3.47297	3.35058	3.27168	3.58101	3.31636	2.86927	3.16893	3.45684	3.41333	3.2154	3.17505	3.19618	3.03994	3.87075	3.74654	3.73472	3.65969	3.63515	3.70292	3.67265
17	3.34479	3.49817	3.36926	3.3074	3.61336	3.34513	2.8875	3.18832	3.47921	3.44162	3.23344	3.19511	3.22213	3.06275	3.89806	3.76743	3.76038	3.68227	3.66271	3.73206	3.69994
17.3333	3.36587	3.51704	3.39153	3.33693	3.63916	3.36722	2.90051	3.21007	3.50632	3.46672	3.25244	3.21433	3.24436	3.08391	3.92124	3.78411	3.78324	3.71097	3.68617	3.75155	3.72376
17.6667	3.38412	3.53935	3.40798	3.37095	3.66322	3.39254	2.91698	3.22921	3.5287	3.4923	3.26819	3.23238	3.26504	3.10492	3.94401	3.79898	3.79985	3.73472	3.71038	3.77329	3.74566
18	3.39892	3.55832	3.42367	3.40496	3.68558	3.415	2.92557	3.24788	3.54676	3.51704	3.28316	3.24612	3.28455	3.12543	3.96246	3.81582	3.8164	3.75685	3.73028	3.79403	3.76332
18.3333	3.41199	3.57559	3.43465	3.42767	3.7038	3.43731	2.93608	3.26085	3.56569	3.53322	3.29807	3.25875	3.30257	3.14254	3.9861	3.83345	3.83518	3.77739	3.75008	3.81089	3.77885
18.6667	3.42367	3.58547	3.44692	3.45783	3.72009	3.45419	2.9454	3.27586	3.5842	3.55383	3.31085	3.27202	3.31601	3.1592	4.00215	3.84151	3.84755	3.79869	3.76655	3.8271	3.79258
19	3.43432	3.59691	3.45981	3.48739	3.73508	3.47494	2.95352	3.28664	3.59913	3.56952	3.32151	3.28177	3.33112	3.17325	4.02006	3.85644	3.86188	3.81466	3.78207	3.84295	3.80915
19.3333	3.44361	3.60483	3.46968	3.49948	3.74698	3.49001	2.96123	3.30118	3.61336	3.58611	3.33112	3.29045	3.34274	3.18796	4.03597	3.86932	3.87189	3.83287	3.79607	3.853	3.82334
19.6667	3.45122	3.61999	3.47724	3.52287	3.75428	3.50599	2.96547	3.31222	3.62503	3.59849	3.34069	3.30015	3.35262	3.19689	4.05401	3.87987	3.88215	3.84467	3.81002	3.86446	3.83633
20	3.46014	3.62628	3.48412	3.53645	3.7655	3.51152	2.97315	3.32082	3.63226	3.61273	3.34888	3.30809	3.36044	3.20971	4.06979	3.88727	3.8921	3.85845	3.82103	3.87759	3.84525
20.3333	3.46541	3.63508	3.49263	3.55639	3.77337	3.52417	2.97661	3.33009	3.64386	3.62219	3.35704	3.31636	3.37264	3.21788	4.08253	3.89522	3.89948	3.87446	3.83172	3.88727	3.85415
20.6667	3.47494	3.63885	3.49883	3.56633	3.78304	3.53193	2.98426	3.33933	3.6573	3.63289	3.36451	3.32392	3.37906	3.2285	4.09362	3.90373	3.90825	3.88699	3.84151	3.89409	3.86102
21	3.48281	3.64355	3.50371	3.5791	3.79087	3.54096	2.98846	3.34922	3.66789	3.64135	3.37332	3.33146	3.38615	3.23838	4.10736	3.9091	3.91729	3.90146	3.85329	3.90089	3.87217
21.3333	3.48903	3.64793	3.50827	3.59183	3.79748	3.54676	2.99152	3.35738	3.67411	3.64793	3.37568	3.34035	3.39153	3.24401	4.11999	3.91983	3.92265	3.91391	3.86331	3.90627	3.88016
21.6667	3.49295	3.6548	3.51282	3.60609	3.80199	3.55704	2.9919	3.36214	3.68062	3.65574	3.38041	3.34479	3.39657	3.24998	4.13097	3.92519	3.93025	3.92744	3.8716	3.91419	3.883
22	3.49883	3.65574	3.51379	3.61115	3.80888	3.56184	2.99533	3.36519	3.68712	3.66353	3.38277	3.34922	3.40396	3.25524	4.14353	3.92913	3.93419	3.93727	3.87873	3.91983	3.89011
22.3333	3.50078	3.65948	3.51736	3.62219	3.81128	3.56952	2.99533	3.37095	3.69176	3.67131	3.38446	3.3516	3.40731	3.2584	4.15472	3.93559	3.9398	3.94653	3.88471	3.92716	3.89352
22.6667	3.50437	3.65948	3.52028	3.6266	3.81666	3.57016	2.99913	3.37433	3.69516	3.67473	3.38716	3.35568	3.41065	3.26399	4.16296	3.9384	3.94457	3.95548	3.88983	3.92856	3.89919
23	3.5086	3.65979	3.52223	3.6332	3.82204	3.57463	3.00027	3.37737	3.69856	3.67969	3.3922	3.35772	3.416	3.26714	4.1733	3.94401	3.94821	3.96887	3.89579	3.93475	3.90259
23.3333	3.50925	3.66384	3.5232	3.64323	3.82413	3.5775	2.99875	3.3794	3.70318	3.68341	3.39389	3.36078	3.41867	3.27098	4.17859	3.94765	3.95296	3.97749	3.90288	3.9398	3.90543
23.6667	3.51087	3.66633	3.52384	3.64699	3.82681	3.58037	3.00142	3.38176	3.7078	3.68898	3.3959	3.35942	3.42234	3.27237	4.18493	3.94933	3.95212	3.98554	3.90712	3.94232	3.90967
24	3.51444	3.66478	3.52514	3.64855	3.82711	3.57974	3.00218	3.38379	3.71149	3.69176	3.39758	3.36078	3.42434	3.27551	4.19021	3.95492	3.9538	3.99164	3.90995	3.94345	3.91362
24.3333	3.51542	3.66633	3.52514	3.65168	3.8289	3.58133	3.00256	3.38547	3.71518	3.69516	3.39859	3.36146	3.42667	3.27725	4.19917	3.95408	3.95436	3.99938	3.91447	3.94429	3.91588
24.6667	3.51607	3.6682	3.52708	3.65979	3.8295	3.58674	3.00218	3.38615	3.71855	3.69794	3.39657	3.36316	3.42967	3.28003	4.2047	3.95771	3.95604	4.0038	3.91955	3.94653	3.91786
25	3.51607	3.66882	3.52773	3.66197	3.83099	3.58801	3.00104	3.38547	3.72284	3.70071	3.39859	3.3635	3.42933	3.28212	4.21074	3.95743	3.95911	4.01097	3.92068	3.94597	3.91842
25.3333	3.51639	3.66851	3.52773	3.66416	3.83188	3.59056	3.00027	3.38682	3.7256	3.70318	3.40094	3.36587	3.43233	3.28559	4.21625	3.95883	3.95771	4.01428	3.92434	3.94821	3.92124
25.6667	3.51736	3.66789	3.52902	3.66696	3.83188	3.59183	3.00142	3.38716	3.72683	3.70687	3.40127	3.36519	3.43399	3.28837	4.2186	3.95716	3.95799	4.01841	3.92744	3.94821	3.92321
26	3.51704	3.66665	3.53031	3.66913	3.83218	3.59278	3.00256	3.38749	3.72897	3.70995	3.40127	3.36451	3.43432	3.29011	4.22358	3.95883	3.95771	4.02116	3.92969	3.94849	3.9249
26.3333	3.51736	3.66571	3.52773	3.671	3.83337	3.59373	3.00407	3.38648	3.73203	3.71087	3.40261	3.36655	3.43631	3.29045	4.22646	3.95855	3.95799	4.0239	3.93222	3.94905	3.9249
26.6667	3.51834	3.66633	3.52708	3.67162	3.83307	3.59468	3.00218	3.38682	3.73417	3.71395	3.40228	3.36553	3.43698	3.29323	4.22985	3.95855	3.95855	4.02665	3.93306	3.94765	3.9249
27	3.51866	3.66197	3.52934	3.67317	3.83367	3.59564	3.00294	3.38581	3.73478	3.71732	3.40396	3.36553	3.4383	3.296	4.23221	3.95771	3.95688	4.03022	3.93362	3.94709	3.92603
27.3333	3.51769	3.66229	3.5274	3.67442	3.83486	3.59627	3.00294	3.38277	3.73569	3.71763	3.40194	3.36417	3.44029	3.29703	4.23377	3.9566	3.95688	4.03159	3.93503	3.94625	3.92603
27.6667	3.51866	3.6626	3.52708	3.67442	3.83426	3.59627	3.0037	3.38277	3.73936	3.71855	3.40194	3.36451	3.44063	3.29807	4.23429	3.9566	3.95632	4.0346	3.93615	3.94737	3.92659
28	3.51899	3.66073	3.52708	3.6769	3.83515	3.59691	3.00218	3.38041	3.73875	3.71947	3.40228	3.36316	3.44228	3.29876	4.23743	3.9566	3.95492	4.03707	3.93615	3.94681	3.92603
28.3333	3.51931	3.65823	3.52514	3.67721	3.83545	3.595	3.00218	3.38041	3.73997	3.72101	3.40161	3.36383	3.44328	3.30118	4.23795	3.9566	3.9538	4.03652	3.93699	3.94513	3.92631
28.6667	3.51801	3.65823	3.52514	3.67752	3.83605	3.59595	3.0018	3.3767	3.73966	3.72284	3.39993	3.36044	3.4446	3.30118	4.24029	3.95492	3.95324	4.03898	3.93643	3.94513	3.92913
29	3.51963	3.65574	3.52352	3.67876	3.83426	3.59564	2.99989	3.37704	3.74027	3.72376	3.39926	3.36282	3.44527	3.30118	4.23951	3.95604	3.9538	4.03898	3.93643	3.94401	3.92772
29.3333	3.51866	3.65605	3.52223	3.67969	3.83486	3.59659	2.99951	3.3767	3.74241	3.72438	3.39859	3.3618	3.44593	3.30257	4.23821	3.95296	3.95184	4.04117	3.93671	3.94317	3.92716
29.6667	3.51736	3.65262	3.5219	3.68093	3.83456	3.59564	2.99837	3.37568	3.74363	3.7256	3.39859	3.36078	3.44493	3.30291	4.24055	3.9524	3.94989	4.04062	3.93727	3.94232	3.928
30	3.51574	3.65262	3.52158	3.68031	3.83367	3.59691	2.99913	3.37467	3.74363	3.7256	3.39725	3.3601	3.44692	3.3036	4.24186	3.95157	3.94989	4.04117	3.93756	3.94092	3.928
30.3333	3.51607	3.65105	3.51996	3.68217	3.83277	3.59691	2.99761	3.3723	3.74424	3.72683	3.39657	3.35874	3.44626	3.30326	4.24055	3.95073	3.94849	4.03926	3.93784	3.94232	3.92856
30.6667	3.51509	3.65012	3.51834	3.68186	3.83277	3.59564	2.99647	3.37298	3.74515	3.72683	3.39557	3.35942	3.44626	3.3036	4.24186	3.94681	3.94653	4.04035	3.93756	3.94008	3.928
31	3.51509	3.65012	3.51607	3.67845	3.83218	3.59468	2.99647	3.37027	3.74332	3.72866	3.39523	3.35874	3.44692	3.30429	4.24264	3.95017	3.94513	4.04117	3.93756	3.94008	3.928
31.3333	3.51282	3.65043	3.51639	3.68	3.83069	3.59627	2.99571	3.3679	3.74363	3.72774	3.39456	3.35806	3.44824	3.30429	4.24238	3.94597	3.94429	4.0409	3.93812	3.93756	3.92687
31.6667	3.51185	3.6498	3.51542	3.68093	3.83039	3.59595	2.9938	3.36655	3.74545	3.72866	3.3912	3.3584	3.44725	3.30395	4.24524	3.94513	3.94485	4.04062	3.93812	3.9398	3.92772
32	3.5112	3.64824	3.51477	3.68217	3.83128	3.59595	2.99228	3.36485	3.74515	3.72927	3.39288	3.35806	3.44758	3.30464	4.24446	3.94457	3.94317	4.04172	3.93587	3.93699	3.92856
32.3333	3.51185	3.64824	3.51412	3.67752	3.8292	3.59373	2.99342	3.36383	3.74515	3.72958	3.39153	3.35636	3.44858	3.30395	4.2455	3.94401	3.94092	4.0409	3.9384	3.93615	3.92856
32.6667	3.50957	3.64636	3.51444	3.68124	3.82771	3.59468	2.99113	3.36146	3.74515	3.72989	3.39019	3.35704	3.44692	3.30395	4.24628	3.94064	3.94008	4.04281	3.93784	3.93587	3.92913
33	3.5086	3.64793	3.51379	3.68031	3.82801	3.59532	2.99075	3.36316	3.74576	3.73111	3.39052	3.3567	3.44791	3.30395	4.24524	3.9398	3.9384	4.04172	3.93784	3.93531	3.92884
33.3333	3.50632	3.64605	3.51412	3.68	3.82741	3.59341	2.99113	3.36214	3.74484	3.73019	3.39052	3.35568	3.44791	3.30429	4.24628	3.93756	3.93868	4.04144	3.93727	3.9339	3.92828
33.6667	3.50534	3.64574	3.51412	3.67907	3.82681	3.59405	2.99037	3.36112	3.74576	3.73111	3.38918	3.355	3.44824	3.30291	4.24628	3.93699	3.93756	4.0409	3.93727	3.93447	3.92828
34	3.50567	3.64386	3.51314	3.67876	3.82741	3.59341	2.98961	3.3601	3.74515	3.73111	3.38817	3.35568	3.44725	3.30222	4.24785	3.93334	3.93812	4.04254	3.93924	3.9325	3.92941
34.3333	3.50762	3.63916	3.51412	3.67566	3.82652	3.59087	2.98999	3.3601	3.74667	3.73111	3.38749	3.355	3.44692	3.30326	4.2455	3.93643	3.93503	4.04309	3.93924	3.93306	3.92884
34.6667	3.50437	3.6401	3.51217	3.68	3.82711	3.59278	2.98846	3.35908	3.74545	3.73142	3.38716	3.3533	3.44659	3.3036	4.24733	3.93587	3.93643	4.04199	3.94008	3.9325	3.92969
35	3.50534	3.64104	3.51087	3.68031	3.82681	3.59183	2.9877	3.35806	3.74515	3.73111	3.38648	3.35534	3.44692	3.30291	4.24863	3.93475	3.9339	4.04445	3.94008	3.93081	3.92884
35.3333	3.50534	3.64073	3.50925	3.68	3.82532	3.59183	2.9877	3.35806	3.74606	3.73203	3.38648	3.35262	3.44527	3.30222	4.24785	3.9339	3.93334	4.04418	3.94176	3.92969	3.92969
35.6667	3.50469	3.63697	3.51022	3.67628	3.82562	3.58992	2.98808	3.35602	3.74667	3.73142	3.38581	3.35364	3.44493	3.30257	4.24863	3.93109	3.93334	4.04309	3.9412	3.92884	3.92969
36	3.50306	3.63916	3.51022	3.68	3.82532	3.59087	2.98464	3.35704	3.74576	3.73203	3.3848	3.355	3.44527	3.30291	4.24706	3.93559	3.93306	4.04445	3.94401	3.92997	3.92913
36.3333	3.50209	3.63853	3.50729	3.67938	3.82353	3.58929	2.98426	3.35602	3.74667	3.73203	3.3848	3.3533	3.44427	3.30222	4.24993	3.93222	3.93306	4.04418	3.94317	3.92884	3.92913
36.6667	3.50143	3.63665	3.5086	3.68	3.82443	3.59024	2.9835	3.35364	3.74667	3.73142	3.38311	3.3516	3.44328	3.30153	4.25227	3.93138	3.93109	4.048	3.94345	3.92856	3.93081
37	3.50274	3.63759	3.50762	3.67969	3.82323	3.58929	2.98197	3.35398	3.74759	3.73111	3.38379	3.35296	3.44394	3.30187	4.25149	3.93334	3.93194	4.04882	3.94485	3.928	3.93081
37.3333	3.50013	3.63634	3.50729	3.67907	3.82025	3.58929	2.9812	3.35296	3.74789	3.73142	3.38311	3.35194	3.44361	3.30153	4.25253	3.93053	3.93109	4.05101	3.94569	3.928	3.93138
37.6667	3.49948	3.63571	3.50632	3.67876	3.82264	3.59024	2.9812	3.35262	3.74972	3.7308	3.38176	3.35228	3.44295	3.30049	4.25357	3.93194	3.93194	4.05155	3.94569	3.92828	3.93109
38	3.50013	3.63477	3.50697	3.67442	3.82115	3.58801	2.98197	3.35126	3.74911	3.73233	3.38075	3.35194	3.44295	3.30118	4.25383	3.93081	3.93081	4.0551	3.94709	3.92659	3.93109
38.3333	3.49817	3.63602	3.50534	3.67876	3.81786	3.5896	2.98005	3.3516	3.74819	3.73172	3.38244	3.35126	3.44228	3.30187	4.25435	3.93109	3.92997	4.05619	3.94653	3.92828	3.93362
38.6667	3.49915	3.63728	3.50567	3.67752	3.81756	3.58929	2.97852	3.35024	3.74941	3.73172	3.38142	3.3516	3.44162	3.30084	4.2559	3.93166	3.92997	4.05537	3.94709	3.92716	3.93419
39	3.4972	3.63759	3.50534	3.67783	3.81696	3.59056	2.9789	3.34956	3.7488	3.73142	3.38142	3.34922	3.44162	3.30084	4.25642	3.93053	3.93025	4.05646	3.94849	3.92884	3.93306
39.3333	3.49687	3.63634	3.50567	3.67721	3.81666	3.58865	2.97775	3.34717	3.74972	3.73142	3.38041	3.35058	3.44063	3.29911	4.2572	3.93081	3.93025	4.05673	3.94877	3.92828	3.93334
39.6667	3.49654	3.63697	3.50437	3.6769	3.81696	3.58992	2.97584	3.34751	3.75032	3.7305	3.38142	3.3499	3.44029	3.30118	4.25824	3.93081	3.93025	4.05891	3.94961	3.92772	3.93531
40	3.49589	3.63602	3.50567	3.6769	3.81666	3.58865	2.97699	3.3482	3.75093	3.7308	3.3821	3.34922	3.44262	3.30084	4.25954	3.93025	3.92997	4.06	3.94933	3.92687	3.93559
40.3333	3.49589	3.63697	3.50599	3.67721	3.81637	3.58929	2.97546	3.34751	3.74911	3.7308	3.37906	3.34786	3.44195	3.30049	4.26006	3.93138	3.92856	4.06272	3.95073	3.92856	3.93587
40.6667	3.49524	3.63697	3.50567	3.67535	3.81457	3.58738	2.97546	3.34615	3.75093	3.73111	3.37839	3.34751	3.44162	3.30049	4.26187	3.93138	3.92828	4.06462	3.95129	3.92828	3.93615
41	3.49393	3.63634	3.50534	3.67628	3.81547	3.58801	2.97622	3.3441	3.75032	3.72958	3.3794	3.34615	3.44129	3.30153	4.26135	3.93278	3.92856	4.0649	3.95408	3.92828	3.93615
41.3333	3.49393	3.63759	3.50567	3.67504	3.81487	3.58801	2.97622	3.34513	3.75124	3.73019	3.38007	3.34649	3.44228	3.30084	4.26447	3.93109	3.93081	4.0668	3.95352	3.92828	3.93756
41.6667	3.49361	3.63697	3.50632	3.67628	3.81607	3.58706	2.9743	3.34376	3.74941	3.73142	3.37974	3.34615	3.44162	3.2998	4.26602	3.93194	3.92913	4.06816	3.9538	3.92687	3.93727
42	3.49263	3.63446	3.50632	3.67442	3.81547	3.58833	2.97507	3.3424	3.74911	3.7308	3.37974	3.34615	3.44195	3.30118	4.26498	3.93138	3.93109	4.06789	3.95436	3.928	3.93699
42.3333	3.49361	3.6354	3.50599	3.6769	3.81607	3.58738	2.97546	3.34206	3.75063	3.73203	3.3794	3.34376	3.44262	3.30084	4.26835	3.93053	3.92744	4.07223	3.95408	3.92884	3.93896
42.6667	3.49361	3.63508	3.50469	3.6769	3.81577	3.5877	2.9743	3.34172	3.75063	3.73233	3.37872	3.34479	3.44361	3.30187	4.27016	3.93109	3.92884	4.07304	3.95492	3.93025	3.93952
43	3.49361	3.6354	3.50534	3.67721	3.81666	3.58706	2.97315	3.34069	3.75032	3.73203	3.37872	3.34479	3.44262	3.30187	4.27068	3.93166	3.92913	4.07576	3.95576	3.92884	3.94036
43.3333	3.49458	3.63634	3.50371	3.67721	3.81756	3.58674	2.9743	3.34035	3.74941	3.73264	3.38041	3.34445	3.44262	3.30118	4.27197	3.93109	3.92772	4.07766	3.95688	3.93138	3.93952
43.6667	3.49393	3.63508	3.50404	3.67752	3.81696	3.58674	2.97469	3.34172	3.75093	3.73233	3.37974	3.34342	3.44361	3.30291	4.27275	3.93306	3.92884	4.07874	3.95716	3.93138	3.94064
44	3.49393	3.63602	3.50371	3.67721	3.81756	3.58611	2.9743	3.33933	3.75002	3.73356	3.38007	3.34274	3.44295	3.30222	4.27663	3.93194	3.92828	4.07766	3.95967	3.92969	3.9412
44.3333	3.49491	3.63602	3.50371	3.67752	3.81726	3.58706	2.97469	3.34001	3.75032	3.73233	3.38007	3.34342	3.44162	3.30257	4.27973	3.9339	3.92744	4.08199	3.96051	3.92941	3.94148
44.6667	3.49393	3.6354	3.50469	3.67814	3.81666	3.58738	2.97392	3.33898	3.75124	3.73294	3.37974	3.34274	3.44262	3.30187	4.28463	3.9339	3.92716	4.08416	3.96302	3.93081	3.94176
45	3.49524	3.6354	3.50437	3.67876	3.81816	3.58738	2.97392	3.3383	3.75093	3.73233	3.37906	3.34308	3.44394	3.30187	4.28541	3.93278	3.92997	4.08307	3.9633	3.93194	3.94204
45.3333	3.49524	3.63571	3.50371	3.67845	3.81876	3.58833	2.97392	3.33864	3.75185	3.73294	3.37906	3.34342	3.44328	3.30257	4.28695	3.93559	3.93025	4.08307	3.96497	3.93025	3.94401
45.6667	3.49458	3.63602	3.50404	3.67721	3.81816	3.58738	2.97315	3.33898	3.75154	3.73294	3.37974	3.34342	3.44328	3.30257	4.28799	3.93559	3.928	4.08361	3.96525	3.93138	3.94401
46	3.49589	3.63665	3.50404	3.67783	3.81786	3.58897	2.97354	3.33796	3.75245	3.73356	3.38075	3.34342	3.44493	3.30153	4.29236	3.93447	3.92969	4.08632	3.96803	3.9325	3.94541
46.3333	3.49426	3.63728	3.50437	3.67876	3.81726	3.58865	2.97354	3.33796	3.75245	3.73386	3.38041	3.34342	3.44493	3.30118	4.29468	3.93587	3.92913	4.0874	3.96915	3.93194	3.94429
46.6667	3.49458	3.63791	3.50502	3.67876	3.81726	3.5896	2.97392	3.33693	3.75367	3.73386	3.38075	3.34308	3.4446	3.30118	4.29571	3.9384	3.92744	4.08929	3.96943	3.93194	3.94597
47	3.49328	3.63853	3.50534	3.67814	3.81756	3.58929	2.97123	3.33693	3.75337	3.73417	3.3794	3.34376	3.44427	3.30257	4.297	3.93756	3.92913	4.09119	3.97026	3.93222	3.94737
47.3333	3.49393	3.63822	3.50599	3.67783	3.81846	3.58897	2.972	3.33898	3.75215	3.73325	3.38075	3.34274	3.4456	3.30291	4.29983	3.93812	3.92884	4.09308	3.9711	3.93334	3.94821
47.6667	3.49491	3.63947	3.50632	3.67876	3.81786	3.58865	2.97047	3.33727	3.75337	3.73539	3.37906	3.34376	3.4456	3.30187	4.29803	3.93868	3.92913	4.09362	3.97249	3.93334	3.94989
48	3.49458	3.63979	3.50632	3.67969	3.81786	3.58929	2.972	3.33864	3.75519	3.73447	3.37974	3.34342	3.4456	3.30049	4.30162	3.94036	3.92856	4.09766	3.97499	3.9325	3.95101

## Sheet: Radius 90s
t (h)	Radius [mm]
2.66667	0.661894
3	0.800738		0.606109	0.677229	0.573217
3.33333	0.917594	0.76578	0.716521	0.806418	0.692225	0.596623	0.688921	0.70052	0.67644	0.865653	0.743385
3.66667	1.03006	0.917594	0.817657	0.911356	0.817657	0.727581	0.817657	0.854084	0.877068	1.01493	0.918915	0.679699
4	1.13945	1.03889	0.918837	1.00767	0.926257	0.834233	0.927488	0.968115	1.00067	1.15069	1.04392	0.814337
4.33333	1.2493	1.15437	1.01331	1.11003	1.02562	0.927488	1.02228	1.06799	1.10162	1.24125	1.14587	0.916507
4.66667	1.34346	1.24289	1.10281	1.20939	1.12635	1.02228	1.13141	1.15644	1.20694	1.33313	1.24658	1.00728
5	1.45438	1.33921	1.1942	1.29855	1.2309	1.1223	1.22997	1.24392	1.29869	1.40734	1.32314	1.09457
5.33333	1.54195	1.42586	1.28264	1.3861	1.33238	1.21504	1.31861	1.32981	1.38916	1.48454	1.40576	1.18009
5.66667	1.65404	1.51659	1.39267	1.47308	1.42906	1.3108	1.40896	1.4136	1.47032	1.5657	1.48826	1.26069
6	1.7745	1.61566	1.50147	1.56836	1.53677	1.40896	1.5045	1.50009	1.5565	1.65292	1.56923	1.34304
6.33333	1.8709	1.70097	1.61	1.66915	1.6388	1.51584	1.60503	1.57976	1.63477	1.73131	1.64421	1.42218
6.66667	1.97473	1.79369	1.715	1.76289	1.74337	1.61778	1.70432	1.68668	1.7217	1.81727	1.72811	1.50524
7	2.08709	1.88608	1.80637	1.85436	1.84325	1.72363	1.80952	1.77231	1.80751	1.90516	1.80812	1.59646
7.33333	2.16701	1.96837	1.89934	1.94387	1.94505	1.82709	1.91012	1.87239	1.89585	1.9936	1.89177	1.68668
7.66667	2.25979	2.0518	1.98511	2.03113	2.04289	1.93033	1.99542	1.96737	1.97522	2.07669	1.98081	1.76919
8	2.36874	2.13839	2.06123	2.11694	2.13037	2.03056	2.09146	2.05691	2.06013	2.16579	2.06013	1.84743
8.33333	2.44272	2.20562	2.14052	2.20096	2.21852	2.12769	2.17646	2.13961	2.14064	2.24989	2.14631	1.92937
8.66667	2.53486	2.28439	2.21337	2.28439	2.30181	2.22211	2.25423	2.2237	2.21673	2.32336	2.21773	2.01291
9	2.63851	2.36777	2.28589	2.36729	2.37835	2.31071	2.33478	2.29897	2.29849	2.40425	2.29512	2.08996
9.33333	2.71018	2.4343	2.35908	2.44738	2.46179	2.39603	2.4117	2.36999	2.37185	2.47894	2.36439	2.16936
9.66667	2.78861	2.50133	2.43054	2.52449	2.54205	2.47658	2.48623	2.44527	2.44889	2.55491	2.43168	2.24842
10	2.88829	2.5808	2.50224	2.60106	2.61636	2.55816	2.55949	2.5148	2.51567	2.6249	2.49583	2.3186
10.3333	2.97162	2.65274	2.5675	2.67074	2.68565	2.62855	2.63245	2.58715	2.59142	2.69101	2.55923	2.38996
10.6667	3.07761	2.72947	2.63591	2.74864	2.75775	2.7009	2.70428	2.65171	2.66543	2.75795	2.62279	2.45655
11	3.12288	2.78082	2.72026	2.83406	2.85172	2.78902	2.79474	2.71392	2.73137	2.81899	2.67495	2.52006
11.3333	3.19404	2.84771	2.79678	2.90993	2.93375	2.86449	2.878	2.78507	2.79971	2.88564	2.73501	2.59312
11.6667	3.22744	2.89026	2.85492	2.9697	2.99304	2.93025	2.94152	2.85289	2.8722	2.95003	2.8005	2.66708
12	3.29149	2.95468	2.90993	3.03092	3.04968	2.98158	3.00066	2.92784	2.95677	3.02184	2.86835	2.74187
12.3333	3.32357	2.99037	2.95661	3.08687	3.09904	3.03694	3.05305	3.01305	3.03279	3.09627	2.93952	2.81232
12.6667	3.37906	3.04294	3.00027	3.13455	3.14291	3.08428	3.10272	3.08052	3.10304	3.16546	3.00534	2.87989
13	3.40798	3.07835	3.03994	3.17828	3.18867	3.12689	3.14907	3.13458	3.16127	3.21638	3.05639	2.93275
13.3333	3.46178	3.12799	3.08169	3.22284	3.2285	3.17181	3.19261	3.18669	3.21569	3.2665	3.10019	2.98726
13.6667	3.48838	3.15811	3.11922	3.26749	3.26958	3.21007	3.2345	3.22872	3.26616	3.31019	3.13987	3.02915
14	3.52773	3.19368	3.15559	3.31188	3.30291	3.25279	3.27829	3.2692	3.31453	3.3454	3.17974	3.07334
14.3333	3.55607	3.2285	3.18617	3.34922	3.33762	3.28594	3.31773	3.31186	3.35892	3.37958	3.21569	3.11193
14.6667	3.59659	3.27133	3.21894	3.38951	3.37399	3.3246	3.35398	3.34837	3.40629	3.41472	3.25396	3.14971
15	3.61778	3.29357	3.25665	3.42401	3.40798	3.35908	3.39456	3.38971	3.44693	3.4511	3.29111	3.18356
15.3333	3.64167	3.32392	3.28559	3.45915	3.43731	3.38951	3.42534	3.42861	3.48932	3.48995	3.32252	3.21878
15.6667	3.67255	3.35364	3.31429	3.49426	3.46903	3.42134	3.46014	3.46261	3.52305	3.52336	3.36122	3.26481
16	3.68805	3.37535	3.34615	3.52514	3.49883	3.44891	3.49263	3.49755	3.56081	3.55615	3.39296	3.29715
16.3333	3.70718	3.3959	3.37332	3.55511	3.52482	3.47396	3.52158	3.53088	3.59663	3.59017	3.4228	3.32718
16.6667	3.73447	3.42601	3.39758	3.58451	3.54965	3.50013	3.5474	3.5698	3.62967	3.61533	3.45014	3.36286
17	3.74393	3.43698	3.42301	3.61052	3.57112	3.52255	3.5775	3.5994	3.66994	3.64486	3.48266	3.39199
17.3333	3.77156	3.45849	3.44493	3.63414	3.5931	3.54032	3.60039	3.6318	3.70203	3.67115	3.50859	3.41731
17.6667	3.7773	3.47166	3.46475	3.65574	3.61305	3.5596	3.62503	3.66301	3.73028	3.69814	3.53589	3.44629
18	3.79929	3.49001	3.48314	3.67442	3.63508	3.5791	3.64511	3.68947	3.76156	3.72198	3.56205	3.47217
18.3333	3.80289	3.4972	3.50143	3.69856	3.65324	3.59405	3.66571	3.71514	3.78878	3.74389	3.58216	3.49565
18.6667	3.82681	3.51444	3.51834	3.71364	3.66913	3.61083	3.68093	3.73857	3.81727	3.76449	3.60737	3.51897
19	3.8295	3.51801	3.53225	3.73019	3.68774	3.62565	3.7038	3.76303	3.84525	3.79112	3.63879	3.54463
19.3333	3.83932	3.52611	3.54644	3.74911	3.70256	3.64041	3.71732	3.78441	3.86503	3.80712	3.65213	3.55956
19.6667	3.86124	3.54161	3.56281	3.7649	3.71824	3.65137	3.7305	3.80131	3.88756	3.82392	3.67175	3.57815
20	3.85947	3.5429	3.57719	3.77549	3.72713	3.66229	3.74637	3.81958	3.90712	3.84065	3.69096	3.59048
20.3333	3.88216	3.55672	3.58738	3.78575	3.74271	3.67566	3.7561	3.83806	3.92603	3.85759	3.70799	3.60615
20.6667	3.87628	3.55575	3.59913	3.79688	3.75397	3.68558	3.76853	3.8573	3.94513	3.87217	3.72613	3.62296
21	3.8851	3.56281	3.61115	3.81038	3.76399	3.69856	3.77821	3.87503	3.95883	3.88955	3.74211	3.63515
21.3333	3.8939	3.56824	3.62282	3.82204	3.77821	3.70718	3.79328	3.88955	3.97082	3.90316	3.75362	3.64516
21.6667	3.91669	3.58037	3.63289	3.83247	3.79087	3.7161	3.80409	3.90316	3.98388	3.9156	3.76273	3.65727
22	3.90882	3.57655	3.64041	3.84139	3.80109	3.72621	3.81158	3.91334	3.99966	3.92659	3.77622	3.66723
22.3333	3.92948	3.58611	3.65199	3.85089	3.81188	3.73233	3.81846	3.92575	4.01152	3.9398	3.78849	3.67626
22.6667	3.91611	3.56088	3.66478	3.85947	3.82174	3.7418	3.82473	3.93727	4.02418	3.95157	3.79985	3.68377
23	3.94108	3.57687	3.67317	3.86892	3.83337	3.74972	3.83188	3.95073	4.03488	3.95995	3.80944	3.69186
23.3333	3.92745	3.56345	3.68031	3.87628	3.8405	3.75731	3.8405	3.96413	4.04226	3.96915	3.81842	3.69635
23.6667	3.92978	3.56313	3.68774	3.88598	3.84674	3.76156	3.84614	3.97582	4.04991	3.97971	3.82767	3.70113
24	3.95553	3.57304	3.69423	3.89185	3.85622	3.76793	3.85089	3.9861	4.057	3.99108	3.83604	3.7077
24.3333	3.93761	3.56601	3.70102	3.898	3.86302	3.77277	3.85858	3.99219	4.06571	3.99938	3.84324	3.71455
24.6667	3.94455	3.56697	3.70687	3.90356	3.87157	3.777	3.86508	4.00049	4.07223	4.00822	3.84956	3.7196
25	3.94398	3.56729	3.71364	3.90823	3.87775	3.77942	3.86774	4.00767	4.08064	4.01538	3.85759	3.72732
25.3333	3.94716	3.56888	3.7164	3.91261	3.88334	3.78243	3.87275	4.01841	4.08713	4.02281	3.86446	3.72939
25.6667	3.94744	3.57176	3.71978	3.9196	3.89009	3.78364	3.87922	4.02555	4.09524	4.02912	3.87303	3.73532
26	3.94976	3.5692	3.72254	3.92484	3.89332	3.78515	3.8804	4.03488	4.10144	4.03679	3.87845	3.73798
26.3333	3.97251	3.57782	3.72774	3.92745	3.90064	3.78756	3.88363	4.04172	4.10763	4.03761	3.88044	3.74477
26.6667	3.95264	3.57112	3.73172	3.93326	3.90677	3.79057	3.88745	4.04363	4.11355	4.04336	3.88585	3.74831
27	3.9512	3.57144	3.73203	3.93645	3.91203	3.79207	3.88862	4.05155	4.11999	4.04991	3.89239	3.75126
27.3333	3.95351	3.56888	3.73508	3.94195	3.91611	3.79177	3.89097	4.06027	4.12321	4.05128	3.89551	3.75509
27.6667	3.97682	3.58006	3.7363	3.94369	3.92106	3.79358	3.89566	4.06272	4.12749	4.0521	3.89749	3.75862
28	3.95409	3.56984	3.73753	3.94629	3.92251	3.79748	3.89595	4.06952	4.13311	4.05591	3.90203	3.76126
28.3333	3.95438	3.56952	3.73661	3.9486	3.92542	3.79658	3.89859	4.06979	4.13472	4.05728	3.90344	3.76303
28.6667	3.97768	3.5791	3.73936	3.95207	3.92978	3.79839	3.89946	4.07765	4.13632	4.057	3.90571	3.76361
29	3.95639	3.56888	3.74271	3.95351	3.9321	3.79809	3.89976	4.07847	4.13979	4.05918	3.90599	3.76655
29.3333	3.95495	3.56952	3.74119	3.95553	3.93645	3.79989	3.90268	4.08036	4.14433	4.06027	3.90882	3.76655
29.6667	3.95726	3.56792	3.74027	3.95726	3.93732	3.80019	3.90297	4.08497	4.14993	4.06109	3.91023	3.7686
30	3.95697	3.56729	3.74027	3.95726	3.93934	3.79839	3.90356	4.08794	4.15126	4.05836	3.91023	3.7686
30.3333	3.97796	3.57782	3.73936	3.95841	3.94224	3.79959	3.9056	4.08821	4.15312	4.06	3.91306	3.7686
30.6667	3.95755	3.5692	3.73814	3.95928	3.94311	3.80019	3.90473	4.08794	4.15419	4.06136	3.91278	3.76948
31	3.95812	3.56761	3.74088	3.96101	3.94629	3.79959	3.90531	4.08848	4.15658	4.06082	3.91306	3.76831
31.3333	3.95668	3.56665	3.73783	3.96331	3.94744	3.80229	3.9056	4.09064	4.15764	4.05755	3.91419	3.76948
31.6667	3.95841	3.56665	3.73753	3.96187	3.94744	3.80079	3.90852	4.0901	4.15871	4.057	3.91504	3.77124
32	3.9587	3.56473	3.73661	3.96245	3.94802	3.80049	3.90677	4.08929	4.15977	4.05836	3.91475	3.77007
32.3333	3.95899	3.56537	3.73508	3.96504	3.94889	3.80169	3.90882	4.0874	4.16057	4.05646	3.91419	3.76831
32.6667	3.98112	3.57336	3.73569	3.96561	3.94976	3.80109	3.90969	4.08713	4.16269	4.05346	3.91334	3.77007
33	3.96043	3.56345	3.73386	3.96532	3.95207	3.80169	3.9094	4.08605	4.16216	4.05128	3.91419	3.76831
33.3333	3.95899	3.56313	3.73264	3.96647	3.95033	3.80289	3.90998	4.08551	4.16243	4.05182	3.91334	3.76802
33.6667	3.95985	3.5612	3.73203	3.96906	3.95322	3.80199	3.91144	4.08307	4.16322	4.04909	3.91362	3.76831
34	3.95957	3.56313	3.73172	3.9682	3.95207	3.80199	3.91057	4.08145	4.16269	4.04964	3.91306	3.76684
34.3333	3.96072	3.56248	3.73111	3.96849	3.95033	3.80229	3.91261	4.07928	4.16296	4.04964	3.91249	3.76684
34.6667	3.95985	3.56345	3.72897	3.9682	3.95293	3.80409	3.91144	4.08334	4.16375	4.04773	3.91221	3.76626
35	3.96072	3.56313	3.73019	3.96964	3.95466	3.80349	3.9129	4.08172	4.16534	4.045	3.91052	3.76626
35.3333	3.9636	3.56184	3.72836	3.97136	3.95524	3.80259	3.91144	4.07982	4.16243	4.04473	3.9108	3.76508
35.6667	3.96158	3.56216	3.72805	3.97136	3.9538	3.80349	3.91173	4.07901	4.16375	4.04226	3.91193	3.76508
36	3.9636	3.56441	3.72836	3.97366	3.95553	3.80259	3.91232	4.07549	4.16349	4.04254	3.90939	3.76332
36.3333	3.96072	3.56056	3.72897	3.97395	3.95582	3.80199	3.91465	4.07603	4.16402	4.04144	3.90797	3.76449
36.6667	3.9636	3.56345	3.72621	3.97423	3.95639	3.80319	3.91232	4.07521	4.16269	4.03926	3.90967	3.76215
37	3.96331	3.56152	3.72652	3.97596	3.95466	3.80259	3.9129	4.07549	4.16428	4.0409	3.90656	3.76156
37.3333	3.96475	3.56184	3.72621	3.97653	3.95841	3.80259	3.91232	4.07413	4.16508	4.03871	3.90684	3.76156
37.6667	3.96619	3.56088	3.72652	3.97882	3.95755	3.80289	3.91348	4.07223	4.16296	4.03679	3.90684	3.76185
38	3.96417	3.56056	3.7253	3.97882	3.95611	3.80349	3.9129	4.07033	4.16508	4.0346	3.90656	3.76038
38.3333	3.96906	3.56152	3.7256	3.97882	3.95755	3.80379	3.91436	4.06789	4.16455	4.0357	3.90599	3.76009
38.6667	3.96647	3.56056	3.7256	3.98112	3.95899	3.80349	3.91348	4.0668	4.16534	4.03323	3.90684	3.76038
39	3.96676	3.55896	3.72591	3.98112	3.96043	3.80139	3.91465	4.06653	4.16534	4.03351	3.90543	3.75803
39.3333	3.9682	3.55992	3.7253	3.97997	3.95985	3.80259	3.91611	4.06571	4.16455	4.03022	3.90373	3.75715
39.6667	3.96992	3.55864	3.7253	3.98255	3.96187	3.80169	3.91581	4.06517	4.16694	4.03022	3.90543	3.75891
40	3.96791	3.55736	3.72591	3.98341	3.96072	3.80199	3.91581	4.0649	4.16641	4.03159	3.90543	3.75715
40.3333	3.97107	3.5596	3.72652	3.98284	3.96187	3.80139	3.91523	4.06082	4.16773	4.02967	3.90429	3.75656
40.6667	3.9728	3.55832	3.72652	3.98427	3.96101	3.80349	3.9164	4.06299	4.16694	4.02967	3.90288	3.75538
41	3.97337	3.55736	3.72621	3.98541	3.96561	3.80259	3.91844	4.06	4.16641	4.02638	3.90174	3.7542
41.3333	3.97337	3.558	3.7256	3.98513	3.96619	3.80319	3.91698	4.05945	4.16879	4.02473	3.90203	3.75479
41.6667	3.97481	3.55415	3.72897	3.98799	3.96446	3.80529	3.91756	4.05782	4.16773	4.02802	3.90118	3.75332
42	3.97653	3.55511	3.72989	3.98913	3.9659	3.80469	3.9196	4.05482	4.16932	4.02583	3.90203	3.75303
42.3333	3.97911	3.55704	3.72927	3.98827	3.96734	3.80379	3.91989	4.05809	4.16853	4.02528	3.90089	3.75126
42.6667	3.9771	3.55415	3.72958	3.98999	3.96762	3.80559	3.92047	4.05564	4.16959	4.02198	3.89891	3.75244
43	3.97911	3.55704	3.73019	3.99171	3.9682	3.80409	3.92047	4.05619	4.17038	4.02088	3.90004	3.75273
43.3333	3.98112	3.55607	3.73111	3.99371	3.97021	3.80619	3.92193	4.05482	4.17012	4.02198	3.90203	3.75155
43.6667	3.98284	3.55639	3.73203	3.99285	3.97194	3.80829	3.92193	4.05428	4.17144	4.02088	3.90004	3.75126
44	3.98656	3.55575	3.73478	3.99256	3.97366	3.80649	3.92367	4.05346	4.17118	4.01978	3.90146	3.75067
44.3333	3.98742	3.55575	3.73569	3.99428	3.97509	3.80858	3.926	4.05264	4.17197	4.01841	3.89919	3.75038
44.6667	3.98856	3.55672	3.7363	3.99656	3.97337	3.81008	3.92542	4.05128	4.17197	4.02088	3.89834	3.75038
45	3.99199	3.55447	3.73814	3.99656	3.97596	3.81008	3.926	4.04991	4.1725	4.02088	3.90004	3.75155
45.3333	3.99228	3.55575	3.73722	3.99799	3.97624	3.81068	3.92861	4.04828	4.17197	4.02226	3.90033	3.74979
45.6667	3.99571	3.55704	3.73783	3.99913	3.97796	3.81278	3.93123	4.04909	4.1725	4.02061	3.89863	3.75008
46	3.99742	3.55639	3.73936	4.00198	3.98026	3.81308	3.93007	4.05182	4.17436	4.01896	3.89749	3.75038
46.3333	4.0017	3.55864	3.73997	4.00284	3.98026	3.81248	3.93152	4.04991	4.1733	4.01841	3.89749	3.7492
46.6667	4.00113	3.55704	3.74088	4.00312	3.98226	3.81547	3.93326	4.04882	4.17436	4.02061	3.90033	3.75038
47	4.00426	3.55607	3.74058	4.00512	3.98169	3.81427	3.93471	4.04882	4.17462	4.02143	3.89778	3.74979
47.3333	4.00597	3.55543	3.7418	4.0054	3.98312	3.81607	3.935	4.04964	4.1733	4.01868	3.89721	3.74979
47.6667	4.00796	3.55511	3.74241	4.00597	3.98599	3.81696	3.93529	4.04909	4.17462	4.01978	3.89948	3.7492
48	4.01166	3.55607	3.74393	4.00711	3.98742	3.81816	3.93645	4.04855	4.17462	4.02116	3.89919	3.74861

## Sheet: Radius 100s
t (h)	Radius [mm]
2.66667	0.57774					0.620181																													0.569222			0.637305	0.654963	0.606109
3	0.790928	0.678071	0.673164			0.804781	0.64636	0.64636	0.71303	0.86053	0.644648																0.624648	0.673851	0.646194			0.588924	0.672156		0.743096	0.661894	0.726012	0.758294	0.783454	0.73538	0.646194	0.653218
3.33333	0.928488	0.850193	0.851492	0.663239	0.752253	0.935603	0.804781	0.802029	0.803406	0.97267	0.749308	0.639484	0.586984	0.588924	0.719698	0.646194	0.653218	0.711728			0.594707	0.661894	0.692225				0.789258	0.814862	0.817657	0.613592	0.714927	0.724438	0.813461	0.708515	0.866434	0.759797	0.872993	0.876905	0.891101	0.853165	0.759797	0.789258
3.66667	1.05131	0.990684	1.00508	0.87328	0.892062	1.06385	0.945006	0.945006	0.965829	1.1126	0.894537	0.819748	0.705287	0.770237	0.855835	0.761297	0.777608	0.827367	0.646194		0.721282	0.774668	0.824604	0.583083	0.682264		0.915104	0.922554	0.950572	0.721282	0.82322	0.858497	0.92379	0.817657	0.967229	0.857167	0.980118	0.981282	0.989387	0.961313	0.847799	0.892381
4	1.16406	1.12347	1.1478	1.01057	1.00508	1.16501	1.05864	1.05445	1.07418	1.21788	0.997356	0.951997	0.813461	0.869064	0.988233	0.845103	0.879503	0.929945	0.752252	0.656702	0.831493	0.880799	0.928717	0.711728	0.783454		1.04436	1.02005	1.05415	0.817657	0.915104	0.963684	1.0088	0.893658	1.05523	0.940921	1.06599	1.07981	1.07558	1.07664	0.936059	0.984764
4.33333	1.26507	1.23679	1.29101	1.13716	1.12052	1.26069	1.15548	1.14394	1.21879	1.3323	1.1126	1.06696	0.925024	0.945759	1.11311	0.933618	0.964867	1.01556	0.831493	0.729148	0.92379	0.973109	1.01781	0.803583	0.882094	0.642653	1.16225	1.10591	1.1593	0.913857	1.01219	1.0617	1.08613	0.984764	1.14842	1.03559	1.14045	1.17978	1.1593	1.17591	1.01893	1.06813
4.66667	1.36184	1.34386	1.42062	1.24747	1.22331	1.36102	1.24658	1.23679	1.31728	1.42761	1.19683	1.18663	1.0234	1.01893	1.21222	1.02116	1.04764	1.10385	0.915104	0.803583	1.01781	1.05739	1.09555	0.88982	0.97662	0.743096	1.27908	1.19897	1.25476	1.01444	1.10694	1.15733	1.17494	1.05631	1.24105	1.12635	1.22718	1.27461	1.2493	1.2764	1.10178	1.15041	0.647957
5	1.45445	1.43994	1.54152	1.34961	1.31308	1.44836	1.33974	1.32063	1.4361	1.52639	1.29443	1.28156	1.11311	1.08718	1.32551	1.10694	1.12635	1.18941	0.998569	0.887252	1.10797	1.14544	1.18365	0.970762	1.06706	0.842399	1.38363	1.29679	1.34686	1.11413	1.2141	1.2493	1.25021	1.14842	1.33921	1.21504	1.31514	1.3662	1.33665	1.3662	1.18268	1.24105	0.73693
5.33333	1.54938	1.53289	1.66624	1.45521	1.40576	1.55081	1.42683	1.41126	1.53145	1.61162	1.37476	1.37637	1.20277	1.15536	1.42906	1.19229	1.21316	1.27372	1.08192	0.973109	1.19802	1.22811	1.26292	1.04218	1.15634	0.931171	1.49232	1.39267	1.44966	1.22253	1.31167	1.33238	1.3358	1.2309	1.42506	1.30469	1.3992	1.46454	1.42666	1.4622	1.27819	1.32292	0.831493
5.66667	1.64286	1.62051	1.78164	1.54008	1.4964	1.63342	1.51256	1.49788	1.64958	1.70687	1.48081	1.47857	1.28974	1.21691	1.53528	1.28353	1.29943	1.35866	1.16714	1.04545	1.28264	1.30731	1.34431	1.1223	1.24197	1.01331	1.61071	1.49461	1.55228	1.32034	1.42346	1.41783	1.41944	1.30818	1.52409	1.39267	1.48619	1.55448	1.51056	1.55741	1.36034	1.41138	0.918837
6	1.73194	1.70817	1.88181	1.63815	1.58813	1.72811	1.60061	1.58813	1.71463	1.78288	1.55295	1.56217	1.38115	1.27908	1.63322	1.36536	1.37369	1.44651	1.2493	1.12939	1.3712	1.3828	1.42506	1.20939	1.32981	1.09346	1.73089	1.59434	1.66024	1.42985	1.53454	1.50071	1.49614	1.39021	1.6213	1.48696	1.57924	1.66093	1.59791	1.65059	1.4473	1.50223	1.01669
6.33333	1.82334	1.79709	1.99305	1.72299	1.68143	1.82031	1.68799	1.67682	1.7977	1.86884	1.62935	1.64354	1.46688	1.34006	1.72098	1.45124	1.45202	1.53082	1.33409	1.20939	1.45908	1.4661	1.50602	1.28885	1.41381	1.17785	1.84881	1.6956	1.76742	1.53899	1.6388	1.58213	1.59862	1.48466	1.7223	1.59076	1.67393	1.75836	1.6929	1.75251	1.5323	1.58573	1.11516
6.66667	1.92363	1.89177	2.10366	1.80996	1.77356	1.91672	1.78288	1.77543	1.89993	1.96006	1.71656	1.72939	1.56107	1.40976	1.82896	1.54491	1.53825	1.62902	1.43225	1.30818	1.54786	1.55301	1.59004	1.36536	1.5045	1.26021	1.96198	1.78987	1.87881	1.64089	1.73681	1.67529	1.68818	1.58285
7	2.02441	1.98304	2.20323	1.90283	1.86766	2.01785	1.87534	1.87769	1.98193	2.04667	1.80506	1.81727	1.65955	1.48004	1.92322	1.64228	1.62832	1.72429	1.52708	1.40328	1.63741	1.64019	1.68005	1.44256	1.58645	1.35024	2.06731	1.88487	1.97993	1.75055	1.83643	1.7603	1.76548	1.68683	1.93623	1.79369	1.86785	1.95266	1.88124	1.95907	1.70566	1.77	1.31601
7.33333	2.12405	2.08042	2.30473	1.98805	1.96006	2.12197	1.98304	1.98471	2.10314	2.15556	1.90574	1.91557	1.75186	1.57996	2.00512	1.74141	1.71167	1.80573	1.61566	1.49079	1.72825	1.72693	1.76354	1.52559	1.67801	1.43384	2.17436	1.98165	2.07283	1.84881	1.91906	1.84634	1.8605	1.779	2.04568	1.89031	1.95907	2.04009	1.97589	2.05069	1.78859	1.85866	1.42426
7.66667	2.21923	2.17241	2.40563	2.0751	2.04991	2.21773	2.08731	2.0889	2.18459	2.23955	1.98025	2.01017	1.84573	1.65887	2.09418	1.83519	1.80004	1.89754	1.71234	1.59291	1.82271	1.81204	1.85251	1.60219	1.76871	1.51433	2.27589	2.06068	2.16859	1.94329	2.00284	1.92796	1.94329	1.87577	2.14584	1.9805	2.04735	2.12823	2.06455	2.14105	1.87394	1.94563	1.52185
8	2.31717	2.26409	2.49804	2.17241	2.13857	2.3143	2.19166	2.18762	2.28257	2.32669	2.07136	2.08678	1.93858	1.73023	2.17856	1.93033	1.88487	1.99084	1.80889	1.68073	1.90833	1.89333	1.93328	1.68209	1.85621	1.59648	2.37643	2.14744	2.26533	2.04009	2.08326	2.00967	2.01647	1.97704	2.24865	2.07722	2.13411	2.21234	2.14903	2.23338	1.95965	2.03113	1.62762
8.33333	2.40838	2.35314	2.58288	2.26409	2.23164	2.40563	2.28885	2.28014	2.36064	2.41251	2.14786	2.17191	2.02775	1.80004	2.2608	2.01703	1.96779	2.07667	1.90054	1.77322	1.98338	1.97184	2.01477	1.76483	1.94622	1.67665	2.4752	2.23287	2.35376	2.13037	2.1538	2.09418	2.09853	2.06068	2.34648	2.16911	2.22211	2.29187	2.23082	2.31712	2.04345	2.1137	1.72495
8.66667	2.49583	2.43939	2.67412	2.34373	2.31812	2.50246	2.38903	2.37744	2.4579	2.50819	2.24448	2.26018	2.10776	1.86295	2.33624	2.11208	2.05458	2.15062	1.99657	1.85743	2.064	2.05013	2.09799	1.84387	2.0255	1.75641	2.57593	2.31515	2.44085	2.22057	2.23031	2.17069	2.17384	2.14638	2.44319	2.25423	2.30379	2.36922	2.30873	2.39317	2.11963	2.19161	1.81958
9	2.57902	2.52926	2.76035	2.42804	2.40287	2.58715	2.47939	2.4709	2.56139	2.60715	2.33948	2.34655	2.19005	1.90773	2.39365	2.20355	2.1234	2.22263	2.08161	1.93446	2.13572	2.12393	2.17699	1.92381	2.11586	1.8327	2.67714	2.39984	2.52765	2.30775	2.31071	2.24713	2.2298	2.23695	2.53216	2.32891	2.38075	2.44505	2.37883	2.47335	2.19992	2.26785	1.91251
9.33333	2.65212	2.60418	2.84475	2.50996	2.48518	2.66916	2.57173	2.56484	2.61519	2.67742	2.39827	2.41617	2.26936	1.9614	2.46827	2.28789	2.19265	2.3023	2.16911	2.0091	2.21182	2.19577	2.24815	1.99714	2.19992	1.90953	2.77219	2.48532	2.61767	2.39031	2.38458	2.31909	2.3186	2.31071	2.62029	2.41359	2.45576	2.52313	2.44459	2.54967	2.27036	2.34015	1.99828
9.66667	2.73905	2.67247	2.92407	2.59355	2.56484	2.74872	2.66377	2.64545	2.72854	2.77553	2.49361	2.5029	2.34745	2.02663	2.53936	2.36777	2.26584	2.37066	2.25372	2.08818	2.28389	2.26433	2.32155	2.07117	2.28139	1.98396	2.86728	2.57239	2.70301	2.46781	2.45344	2.38362	2.3884	2.3884	2.70639	2.48899	2.52855	2.59491	2.50953	2.62507	2.34307	2.41359	2.08052
10	2.81232	2.7463	2.99281	2.67247	2.64252	2.82955	2.75314	2.73582	2.78943	2.85599	2.55837	2.58288	2.42443	2.07283	2.59579	2.44878	2.33331	2.43945	2.33868	2.16543	2.34356	2.32842	2.39174	2.14159	2.3644	2.05514	2.95352	2.65274	2.78369	2.54743	2.52268	2.46133	2.44412	2.47197	2.78779	2.5635	2.60894	2.66304	2.57328	2.69371	2.41406	2.49128	2.1649
10.3333	2.89367	2.81467	3.06397	2.74389	2.71514	2.90396	2.83736	2.81546	2.8695	2.93501	2.63456	2.65878	2.49357	2.12447	2.65618	2.5281	2.40079	2.50634	2.41595	2.2395	2.40886	2.39365	2.45994	2.20924	2.43617	2.12286	3.04819	2.73407	2.87046	2.62637	2.59711	2.52403	2.52358	2.53306	2.86529	2.63461	2.6814	2.73073	2.64456	2.76312	2.48164	2.55771	2.23695
10.6667	2.97205	2.88142	3.12964	2.81663	2.78784	2.97317	2.91839	2.88027	2.95153	3.01635	2.70821	2.73299	2.55905	2.15909	2.69837	2.605	2.46457	2.56573	2.48807	2.29734	2.4692	2.4539	2.51951	2.27187	2.51498	2.18065	3.14363	2.8171	2.95738	2.70554	2.67458	2.59183	2.58169	2.60763	2.93958	2.70259	2.74864	2.79922	2.70512	2.82963	2.54743	2.62594	2.30577
11	3.03935	2.94478	3.19604	2.88372	2.86102	3.04334	2.9965	2.95976	3.00754	3.07693	2.76675	2.79141	2.63158	2.2144	2.76519	2.67245	2.5272	2.63591	2.56662	2.36729	2.53126	2.51362	2.58875	2.33673	2.58698	2.24916	3.23026	2.89224	3.03694	2.77877	2.73741	2.65231	2.64887	2.66861	3.01583	2.77261	2.82438	2.86568	2.77137	2.90208	2.61069	2.69625	2.37835
11.3333	3.11051	3.01452	3.26853	2.95826	2.93124	3.11477	3.07765	3.03825	3.08088	3.15111	2.83034	2.86565	2.70259	2.26382	2.81629	2.7424	2.59007	2.70428	2.64024	2.43851	2.5993	2.57726	2.65188	2.40601	2.66004	2.31712	3.30429	2.96701	3.10456	2.84009	2.798	2.72152	2.70765	2.74739	3.09388	2.84531	2.89972	2.95004	2.84972	2.98158	2.69837	2.77548	2.46689
11.6667	3.22804	3.10767	3.35925	3.06433	3.02732	3.2026	3.16651	3.13176	3.13529	3.2095	2.89023	2.92331	2.78041	2.31367	2.87483	2.84611	2.66176	2.77055	2.7211	2.52177	2.67074	2.65403	2.72947	2.48669	2.75112	2.39174	3.37264	3.03205	3.16893	2.90365	2.85931	2.79963	2.79963	2.81629	3.16929	2.92596	2.97775	3.02414	2.92596	3.05865	2.77548	2.85132	2.54474
12	3.32452	3.18217	3.43248	3.15076	3.10304	3.28539	3.26345	3.23966	3.22564	3.30183	2.97317	3.0046	2.85412	2.37211	2.94888	2.92089	2.7324	2.85012	2.80167	2.60544	2.73699	2.71942	2.80574	2.55459	2.82761	2.45901	3.43432	3.08539	3.22567	2.95468	2.90954	2.87562	2.85891	2.90287	3.24612	3.00521	3.05043	3.08834	2.98808	3.12835	2.8417	2.91933	2.60763
12.3333	3.38122	3.24102	3.49533	3.215	3.16546	3.34936	3.35431	3.33613	3.30752	3.38024	3.04733	3.0816	2.91972	2.4117	2.98655	2.98961	2.79106	2.90365	2.86409	2.65918	2.79882	2.77302	2.86807	2.61331	2.89815	2.52268	3.49426	3.14472	3.28143	3.00787	2.95545	2.94617	2.93375	2.96239	3.30981	3.06684	3.11593	3.14617	3.04482	3.17972	2.89263	2.97967	2.66647
12.6667	3.4373	3.28943	3.53964	3.26616	3.21947	3.40467	3.40727	3.39524	3.39427	3.46069	3.12363	3.15672	2.97469	2.46457	3.04069	3.03806	2.84411	2.96431	2.92713	2.71144	2.85212	2.82721	2.92089	2.67032	2.95854	2.5808	3.54708	3.19654	3.3342	3.05753	3.00749	3.00483	2.98426	3.02904	3.36858	3.11666	3.17792	3.19903	3.09056	3.23415	2.93919	3.03431	2.71397
13	3.47758	3.33448	3.58524	3.30886	3.26548	3.46101	3.45206	3.43183	3.52085	3.54307	3.19915	3.21981	3.03054	2.49814	3.08058	3.09793	2.89854	3.00787	2.9919	2.74822	2.90444	2.87562	2.96931	2.72194	3.01507	2.63115	3.60198	3.24682	3.38547	3.10456	3.04744	3.05454	3.04182	3.07724	3.41633	3.16641	3.22956	3.24928	3.13636	3.27864	2.98999	3.08724	2.76023
13.3333	3.52274	3.37991	3.63058	3.35464	3.31553	3.50922	3.4947	3.45014	3.49691	3.57876	3.23146	3.26954	3.07724	2.53801	3.1108	3.14399	2.94733	3.05529	3.04182	2.79147	2.94694	2.91776	3.02112	2.76972	3.06498	2.67885	3.6498	3.29738	3.43166	3.14835	3.09499	3.10529	3.08354	3.13163	3.46804	3.20829	3.28108	3.29565	3.17684	3.32014	3.03468	3.13564	2.80411
13.6667	3.56732	3.41957	3.66934	3.40045	3.3622	3.5549	3.53276	3.49249	3.57103	3.6397	3.28875	3.3295	3.12726	2.56573	3.14254	3.1901	2.99266	3.09904	3.09388	2.82842	2.99647	2.96123	3.06535	2.81791	3.11263	2.72571	3.69886	3.34274	3.47593	3.19404	3.13382	3.14617	3.13636	3.17037	3.51087	3.25174	3.33214	3.33488	3.21717	3.36214	3.07316	3.18115	2.84891
14	3.60615	3.46165	3.7074	3.44565	3.405	3.59786	3.5698	3.51488	3.61105	3.68617	3.33348	3.37172	3.17361	2.59227	3.16136	3.23873	3.03506	3.14109	3.14508	2.8629	3.03806	3.00332	3.10676	2.8613	3.16064	2.7689	3.74484	3.39254	3.5274	3.23556	3.1772	3.1876	3.18043	3.21291	3.55639	3.29426	3.37264	3.37704	3.25595	3.40664	3.1141	3.22673	2.88473
14.3333	3.64941	3.50102	3.74802	3.48869	3.44629	3.64456	3.60737	3.55273	3.63879	3.7199	3.3714	3.40921	3.21504	2.62811	3.2001	3.28038	3.0765	3.17936	3.18939	2.9009	3.07613	3.04519	3.15016	2.90444	3.20117	2.80899	3.78696	3.43033	3.57048	3.27446	3.21291	3.22602	3.22142	3.25384	3.59405	3.33385	3.417	3.40998	3.29496	3.44361	3.14871	3.26399	2.92245
14.6667	3.68977	3.54057	3.78557	3.52524	3.48552	3.68527	3.64607	3.58555	3.69037	3.77271	3.42054	3.46293	3.2626	2.65102	3.22213	3.32563	3.11776	3.2154	3.23662	2.93997	3.11593	3.08206	3.18724	2.94849	3.24084	2.84691	3.83099	3.47297	3.61336	3.31532	3.25384	3.2633	3.24612	3.29876	3.63571	3.36892	3.45816	3.45155	3.32426	3.47986	3.18402	3.31532	2.95545
15	3.72969	3.57598	3.82594	3.56329	3.52242	3.72821	3.68917	3.61991	3.71365	3.80044	3.44886	3.49027	3.29911	2.68608	3.27202	3.36248	3.15631	3.2563	3.28003	2.97661	3.15522	3.11812	3.22249	2.98732	3.28177	2.88868	3.87334	3.51899	3.65105	3.3516	3.28525	3.29842	3.28941	3.32872	3.67628	3.40094	3.4985	3.48838	3.3584	3.51801	3.21788	3.34683	2.99304
15.3333	3.77212	3.61258	3.86074	3.59786	3.55988	3.77036	3.72554	3.65969	3.7489	3.84266	3.48678	3.52963	3.33967	2.70765	3.29045	3.40396	3.19796	3.29045	3.32254	3.00863	3.18975	3.15016	3.25945	3.02414	3.31567	2.92245	3.91057	3.55319	3.68712	3.38547	3.32254	3.32974	3.32117	3.36553	3.71149	3.44262	3.54161	3.52708	3.39052	3.54901	3.25314	3.38918	3.02602
15.6667	3.81002	3.6485	3.89976	3.63818	3.59786	3.80741	3.75979	3.69306	3.82045	3.90401	3.55366	3.58648	3.37839	2.73115	3.32529	3.4393	3.23344	3.32529	3.36112	3.04257	3.22284	3.18294	3.29288	3.06051	3.3516	2.95969	3.95293	3.58992	3.72101	3.41934	3.35534	3.36689	3.34342	3.39926	3.74545	3.47593	3.57176	3.55639	3.42301	3.58801	3.28247	3.42067	3.0579
16	3.84151	3.68227	3.93166	3.67747	3.63302	3.84266	3.79927	3.72672	3.82652	3.91842	3.56515	3.60921	3.415	2.76023	3.3516	3.47724	3.27446	3.36282	3.40429	3.07724	3.25524	3.2122	3.3246	3.08834	3.38176	2.99152	3.99256	3.62817	3.75823	3.44957	3.38379	3.39691	3.38884	3.42734	3.78424	3.50502	3.60799	3.59056	3.45651	3.61589	3.3136	3.45618	3.08908
16.3333	3.87702	3.71693	3.96385	3.71008	3.67055	3.87816	3.83143	3.76126	3.87731	3.96803	3.61043	3.65878	3.45188	2.78983	3.38311	3.50762	3.3105	3.39792	3.44394	3.1119	3.28282	3.23943	3.35262	3.12543	3.41667	3.01772	4.02557	3.65792	3.78635	3.47953	3.41333	3.42634	3.41366	3.45618	3.81547	3.54032	3.64229	3.62314	3.48674	3.64918	3.34445	3.49197	3.11666
16.6667	3.91306	3.74802	3.99662	3.74477	3.70352	3.91419	3.86303	3.79665	3.91221	4.00629	3.6482	3.69216	3.48445	2.80492	3.40127	3.5429	3.34342	3.428	3.47921	3.14	3.31257	3.2633	3.3848	3.15197	3.4446	3.04594	4.0659	3.69114	3.81876	3.51055	3.44228	3.45386	3.431	3.48968	3.85148	3.56792	3.67659	3.65074	3.51379	3.67721	3.37467	3.51996	3.14109
17	3.9398	3.7809	4.02418	3.77973	3.73827	3.94933	3.89976	3.82479	3.95604	4.05428	3.68647	3.73916	3.52028	2.82721	3.42667	3.57719	3.37737	3.45783	3.51477	3.16893	3.33693	3.28976	3.41199	3.18724	3.46837	3.07687	4.09776	3.72591	3.84941	3.53774	3.47264	3.47921	3.46705	3.50925	3.88011	3.59595	3.71087	3.68341	3.53645	3.70564	3.39657	3.55062	3.16497
17.3333	3.9711	3.80741	4.04855	3.81292	3.76831	3.9811	3.92547	3.85386	3.97916	4.07087	3.71127	3.75862	3.55319	2.85452	3.45386	3.60293	3.41232	3.4887	3.55319	3.19903	3.36485	3.31532	3.43532	3.2154	3.49654	3.10456	4.13435	3.75276	3.8751	3.56729	3.49622	3.50274	3.48379	3.54129	3.90648	3.62628	3.73722	3.70841	3.56281	3.72958	3.42667	3.57782	3.18903
17.6667	4.00104	3.83633	4.08118	3.83978	3.79811	4.00987	3.95827	3.88727	4.01345	4.10709	3.73946	3.79898	3.57655	2.87641	3.47363	3.63257	3.44228	3.52028	3.58165	3.22744	3.38817	3.33214	3.46442	3.23591	3.51639	3.13163	4.16186	3.78062	3.89976	3.5896	3.52287	3.52482	3.50664	3.56216	3.93732	3.65605	3.76793	3.73233	3.58865	3.7564	3.44626	3.60166	3.21078
18	4.02747	3.86274	4.10629	3.87103	3.82479	4.0398	3.98582	3.91278	4.04718	4.13792	3.77066	3.8297	3.60546	2.88987	3.48641	3.6626	3.46837	3.54322	3.61494	3.25384	3.41366	3.35432	3.48609	3.26923	3.53645	3.15559	4.19326	3.81098	3.9228	3.61241	3.54579	3.5474	3.51542	3.58992	3.9636	3.68062	3.79688	3.75853	3.60704	3.78183	3.46771	3.62628	3.23203
18.3333	4.05428	3.88699	4.12616	3.90004	3.85071	4.0725	4.01428	3.93812	4.08524	4.1672	3.80218	3.85185	3.63289	2.91737	3.51185	3.68341	3.49458	3.57208	3.64668	3.28143	3.43698	3.37805	3.50632	3.29288	3.55639	3.17792	4.21957	3.83842	3.94658	3.63446	3.56792	3.56409	3.55351	3.60546	3.98513	3.70349	3.82055	3.78093	3.62691	3.79989	3.48936	3.65105	3.24577
18.6667	4.08416	3.90882	4.15019	3.92856	3.87959	4.09658	4.03953	3.96497	4.10844	4.19021	3.8245	3.88414	3.65855	2.92752	3.52676	3.70749	3.5232	3.59214	3.67007	3.30636	3.45519	3.39389	3.52773	3.31326	3.57336	3.20117	4.25028	3.85947	3.96849	3.65355	3.58992	3.58229	3.56409	3.63634	4.00597	3.7256	3.84911	3.80409	3.64386	3.82144	3.50697	3.67193	3.26225
19	4.10736	3.93053	4.17436	3.9538	3.89891	4.11596	4.06979	3.99192	4.13499	4.2152	3.84496	3.90967	3.68	2.94113	3.54	3.73172	3.54483	3.61336	3.69732	3.33454	3.4756	3.40463	3.54772	3.33727	3.59278	3.2193	4.27731	3.88393	3.9897	3.67628	3.6102	3.59754	3.58483	3.65262	4.02614	3.74698	3.87393	3.82503	3.66104	3.84199	3.52643	3.68867	3.27934
19.3333	4.13124	3.95324	4.19153	3.97555	3.92011	4.14726	4.08956	4.00767	4.16163	4.23743	3.86732	3.92884	3.70287	2.95584	3.5596	3.75185	3.56409	3.63257	3.71978	3.35738	3.49263	3.42301	3.56441	3.36044	3.60514	3.23908	4.30204	3.90998	4.01138	3.69516	3.6288	3.61715	3.59437	3.671	4.04987	3.76308	3.89449	3.84496	3.68186	3.8574	3.54064	3.7121	3.29357
19.6667	4.15392	3.97082	4.21205	4.00187	3.94373	4.17091	4.11408	4.03734	4.18784	4.2598	3.89267	3.95995	3.71917	2.97239	3.57176	3.76732	3.58897	3.6523	3.74149	3.38345	3.51022	3.43864	3.57846	3.37906	3.61305	3.25665	4.32558	3.92919	4.02869	3.7118	3.65324	3.63822	3.60229	3.69701	4.0645	3.78183	3.91523	3.86833	3.69485	3.87599	3.55415	3.72774	3.30947
20	4.17409	3.99136	4.22881	4.02335	3.96162	4.19285	4.13739	4.05973	4.20837	4.2805	3.91108	3.97777	3.74027	2.9938	3.5931	3.78213	3.60925	3.67379	3.76156	3.40965	3.52643	3.44858	3.59087	3.39557	3.6244	3.27481	4.35083	3.94542	4.04536	3.72836	3.66913	3.65012	3.62597	3.71118	4.08522	3.79688	3.93384	3.88305	3.70872	3.88862	3.57016	3.74241	3.32117
20.3333	4.19628	4.01097	4.24628	4.04828	3.98055	4.21651	4.15685	4.07765	4.23482	4.30317	3.93475	3.998	3.75914	2.99951	3.60324	3.80379	3.62628	3.69022	3.78334	3.42967	3.53871	3.46112	3.60704	3.415	3.63665	3.28941	4.37436	3.96446	4.06028	3.74454	3.6862	3.66291	3.63069	3.73478	4.09943	3.81487	3.95438	3.89946	3.72284	3.90677	3.58547	3.75671	3.3318
20.6667	4.21598	4.02994	4.26447	4.0668	3.99717	4.23482	4.17991	4.0982	4.24524	4.31138	3.94401	4.01318	3.77489	3.01242	3.61589	3.82055	3.64073	3.70534	3.79989	3.45089	3.55062	3.47264	3.61841	3.43498	3.65074	3.30602	4.39985	3.98226	4.08382	3.76035	3.70133	3.67566	3.65105	3.74637	4.11333	3.82801	3.97308	3.91727	3.73478	3.92309	3.59722	3.77186	3.3441
21	4.23847	4.04773	4.2805	4.08875	4.01731	4.25279	4.19838	4.11731	4.26887	4.33286	3.9619	4.03405	3.78967	3.02791	3.631	3.83247	3.65761	3.72131	3.81726	3.4756	3.56377	3.48019	3.63477	3.44858	3.66229	3.31876	4.42416	4.00711	4.09693	3.77428	3.71671	3.6862	3.66166	3.76156	4.13076	3.84763	3.99056	3.93181	3.74759	3.93355	3.60641	3.78515	3.35262
21.3333	4.2585	4.06435	4.29751	4.10736	4.0346	4.27197	4.21677	4.13097	4.29288	4.34915	3.98526	4.05237	3.80769	3.03618	3.64104	3.84792	3.67193	3.73478	3.83515	3.49295	3.57495	3.48707	3.64449	3.46211	3.67069	3.3318	4.44294	4.02302	4.11416	3.78635	3.73111	3.70195	3.67379	3.78093	4.14482	3.86272	4.00882	3.94947	3.75944	3.94571	3.61589	3.79718	3.3618
21.6667	4.2756	4.08199	4.31471	4.12428	4.04855	4.29185	4.2369	4.14673	4.31086	4.35981	4.00104	4.0668	3.82294	3.04706	3.65324	3.86124	3.69022	3.75124	3.85207	3.51379	3.58674	3.49263	3.65262	3.47593	3.67876	3.34717	4.46625	4.03661	4.12745	3.80109	3.74363	3.71917	3.67566	3.80319	4.16103	3.87363	4.02614	3.96331	3.77247	3.95841	3.62754	3.81068	3.36993
22	4.29623	4.09631	4.3298	4.1454	4.06653	4.30599	4.25201	4.16481	4.32494	4.37424	4.01566	4.07847	3.83813	3.05716	3.66229	3.87981	3.7038	3.76369	3.87039	3.53613	3.59817	3.50339	3.66447	3.49034	3.68805	3.35704	4.48918	4.04959	4.14207	3.81128	3.75883	3.72989	3.69516	3.81367	4.17472	3.88628	4.03887	3.97624	3.78304	3.96935	3.64198	3.82323	3.37737
22.3333	4.31599	4.1114	4.34661	4.1603	4.08226	4.32187	4.27327	4.18309	4.34941	4.3929	4.03515	4.09658	3.85	3.07242	3.67442	3.88892	3.7161	3.77579	3.88481	3.56281	3.60925	3.51477	3.67535	3.50697	3.69454	3.36993	4.50769	4.06253	4.15225	3.81905	3.76732	3.7418	3.69578	3.83932	4.18727	3.89888	4.05775	3.99142	3.79508	3.98312	3.65324	3.83367	3.38615
22.6667	4.33133	4.12803	4.36032	4.17674	4.09551	4.3405	4.29133	4.1997	4.37777	4.40972	4.05891	4.11355	3.86302	3.07872	3.68836	3.90034	3.72805	3.79177	3.89742	3.58133	3.61904	3.52255	3.68217	3.52223	3.70041	3.38142	4.52639	4.07711	4.16624	3.83277	3.77549	3.75124	3.71118	3.84614	4.2006	3.91407	4.06955	4.0017	3.80888	3.99028	3.66447	3.84674	3.38918
23	4.35017	4.14646	4.37828	4.19206	4.1122	4.35601	4.30804	4.22018	4.40922	4.43446	4.09551	4.13124	3.87452	3.08021	3.69053	3.91523	3.73905	3.79899	3.91232	3.59691	3.62597	3.52967	3.69176	3.53419	3.70964	3.39422	4.54349	4.09052	4.17854	3.84288	3.78424	3.76581	3.7121	3.87098	4.21497	3.92513	4.08494	4.02104	3.81726	4.00654	3.67473	3.85533	3.39993
23.3333	4.36336	4.16189	4.39541	4.20916	4.12803	4.3669	4.33082	4.2369	4.41948	4.44616	4.10252	4.15046	3.8854	3.09093	3.70287	3.92629	3.74728	3.81367	3.92455	3.61557	3.63508	3.53548	3.70195	3.54547	3.71794	3.40463	4.56154	4.10138	4.19217	3.85296	3.79448	3.77489	3.72468	3.87775	4.22417	3.93616	4.09999	4.0335	3.82801	4.0182	3.68186	3.8639	3.40362
23.6667	4.38156	4.1725	4.41248	4.22358	4.14566	4.38131	4.34814	4.24915	4.42199	4.45113	4.10629	4.15259	3.89888	3.09904	3.71487	3.93761	3.76308	3.82264	3.935	3.63351	3.64323	3.54161	3.7118	3.55543	3.72713	3.41166	4.57627	4.11222	4.2044	3.86065	3.80289	3.78726	3.7363	3.8939	4.23711	3.94831	4.11444	4.04593	3.83932	4.02557	3.69022	3.87393	3.40898
24	4.39717	4.18678	4.42773	4.24186	4.15791	4.39717	4.36387	4.26083	4.45486	4.48206	4.14646	4.17938	3.91086	3.10786	3.72407	3.94773	3.77398	3.83247	3.94918	3.64636	3.64918	3.54772	3.71978	3.56984	3.73294	3.42101	4.59145	4.12441	4.21362	3.86774	3.80858	3.80049	3.73539	3.91902	4.24867	3.96014	4.12247	4.05804	3.85207	4.03463	3.6967	3.88216	3.41633
24.3333	4.41598	4.19917	4.44194	4.25746	4.16826	4.41323	4.38055	4.27534	4.45957	4.4865	4.14913	4.18414	3.92338	3.11812	3.73233	3.96216	3.78304	3.84347	3.95784	3.65855	3.65699	3.55222	3.7256	3.5826	3.73814	3.43465	4.60535	4.13021	4.22633	3.87157	3.81696	3.80799	3.75488	3.92396	4.25886	3.97165	4.13546	4.06365	3.86154	4.04395	3.70718	3.89156	3.42001
24.6667	4.43222	4.21231	4.45734	4.27172	4.18414	4.42848	4.39466	4.28824	4.47984	4.50003	4.16455	4.19417	3.93326	3.12434	3.74119	3.97509	3.79538	3.85562	3.97165	3.67473	3.66416	3.55736	3.73417	3.59405	3.74484	3.44527	4.61895	4.13904	4.2363	3.87805	3.82085	3.81607	3.76369	3.93761	4.2701	3.97911	4.14785	4.07739	3.86951	4.05775	3.71518	3.89859	3.42567
25	4.44542	4.22567	4.47145	4.28515	4.19786	4.44666	4.40947	4.30419	4.50862	4.52696	4.19259	4.21808	3.94513	3.1309	3.75093	3.9857	3.80439	3.86361	3.98398	3.68898	3.67069	3.5612	3.74027	3.60609	3.75245	3.45353	4.63325	4.14593	4.24088	3.88216	3.82503	3.82711	3.77126	3.95524	4.27944	3.98885	4.15555	4.08801	3.87805	4.06646	3.72193	3.9059	3.42767
25.3333	4.46427	4.23899	4.48675	4.29777	4.21284	4.45932	4.42174	4.31855	4.52135	4.53599	4.20811	4.22593	3.95409	3.14036	3.7652	3.99799	3.81487	3.87128	3.99542	3.70441	3.67659	3.56633	3.74393	3.61683	3.75519	3.46178	4.64702	4.15362	4.25001	3.88393	3.8289	3.83753	3.7773	3.96849	4.29195	3.99856	4.16542	4.09609	3.88686	4.07543	3.73203	3.91203	3.43399
25.6667	4.47886	4.25253	4.49978	4.31112	4.22253	4.46848	4.44218	4.3326	4.52306	4.53672	4.20496	4.23038	3.96331	3.1469	3.77337	4.00796	3.82055	3.88158	4.0054	3.71548	3.68465	3.5692	3.75185	3.62471	3.76278	3.46903	4.661	4.15966	4.25726	3.88833	3.83277	3.84644	3.78334	3.98169	4.30072	4.00853	4.17581	4.10861	3.89742	4.08354	3.73875	3.91989	3.43731
26	4.49315	4.26369	4.51229	4.32699	4.23429	4.48404	4.45907	4.34407	4.56876	4.56731	4.24108	4.23925	3.97308	3.1545	3.78334	4.0216	3.8286	3.88862	4.01479	3.72621	3.68651	3.57336	3.75731	3.6332	3.76611	3.47494	4.66907	4.16679	4.26288	3.89156	3.83723	3.85681	3.78906	3.99628	4.31184	4.01706	4.18018	4.11998	3.90385	4.08912	3.74484	3.92455	3.44129
26.3333	4.50788	4.27585	4.52428	4.34636	4.24498	4.49733	4.47417	4.36032	4.57747	4.57964	4.24134	4.2559	3.97997	3.15992	3.79237	4.03378	3.83367	3.89566	4.02529	3.73661	3.69238	3.57687	3.76369	3.64386	3.77247	3.48052	4.68054	4.17144	4.27037	3.89449	3.8411	3.86685	3.78394	4.02047	4.32268	4.02812	4.18918	4.12745	3.91203	4.09776	3.7485	3.93181	3.44593
26.6667	4.52843	4.28876	4.54062	4.35829	4.25824	4.51352	4.48625	4.37399	4.61618	4.61019	4.2903	4.26524	3.98799	3.17433	3.80349	4.03803	3.84466	3.90473	4.03548	3.75276	3.69856	3.58037	3.77065	3.65199	3.7764	3.48707	4.68979	4.17527	4.27571	3.89888	3.84347	3.8701	3.79959	4.02359	4.33085	4.03803	4.19625	4.13573	3.91581	4.10416	3.75671	3.93674	3.4499
27	4.54037	4.29571	4.55398	4.37095	4.2699	4.52648	4.5015	4.38862	4.60635	4.60491	4.26343	4.27094	3.99685	3.18043	3.81397	4.04677	3.85296	3.91144	4.04452	3.76338	3.70256	3.58324	3.7767	3.66416	3.78032	3.49458	4.69757	4.17854	4.28051	3.898	3.84407	3.87952	3.80559	4.03746	4.33875	4.04677	4.20305	4.1473	3.92484	4.11166	3.75823	3.94311	3.4532
27.3333	4.55277	4.30676	4.56707	4.38106	4.27895	4.53891	4.51548	4.39843	4.60971	4.60803	4.26472	4.27456	4.00626	3.18903	3.82622	4.05579	3.86242	3.91844	4.05297	3.76974	3.7078	3.58738	3.78153	3.671	3.78696	3.50046	4.70509	4.18237	4.28424	3.90268	3.84466	3.88774	3.81098	4.05044	4.34611	4.05438	4.21172	4.16021	3.92832	4.11942	3.76429	3.94773	3.45618
27.6667	4.56852	4.31957	4.5806	4.39591	4.29056	4.55083	4.52721	4.40797	4.64077	4.61929	4.30137	4.2774	4.01507	3.18688	3.82681	4.06983	3.86803	3.91931	4.05944	3.76914	3.71303	3.59151	3.78485	3.67938	3.79328	3.50567	4.70873	4.18482	4.28983	3.90531	3.84614	3.89917	3.80349	4.07683	4.35135	4.06028	4.21714	4.16788	3.93355	4.12413	3.76974	3.95264	3.45948
28	4.58012	4.33235	4.58832	4.41047	4.30111	4.56174	4.53453	4.41798	4.65551	4.63791	4.30085	4.30085	4.02189	3.20331	3.84614	4.07151	3.87569	3.93007	4.0673	3.77821	3.71671	3.59246	3.79057	3.6862	3.79809	3.5112	4.7126	4.18754	4.29381	3.90736	3.85029	3.90151	3.81965	4.07571	4.35843	4.06618	4.22335	4.1739	3.9379	4.128	3.77337	3.95841	3.4631
28.3333	4.59578	4.34203	4.60155	4.42074	4.31163	4.57481	4.54694	4.42623	4.65266	4.63624	4.29751	4.2988	4.02926	3.20687	3.85503	4.07795	3.88216	3.93645	4.07235	3.78485	3.7207	3.59405	3.79508	3.69362	3.80319	3.51704	4.71672	4.19081	4.29727	3.90852	3.85118	3.90823	3.82383	4.08494	4.3647	4.07403	4.22875	4.18237	3.94195	4.13408	3.77821	3.96388	3.46903
28.6667	4.60563	4.3489	4.60995	4.42798	4.31829	4.5847	4.55787	4.43272	4.69593	4.66974	4.33617	4.32928	4.03492	3.21327	3.8639	4.08102	3.89068	3.94253	4.08242	3.78786	3.72468	3.595	3.79899	3.7001	3.80559	3.52287	4.71914	4.19136	4.29992	3.90882	3.85118	3.91902	3.81607	4.11333	4.37384	4.07907	4.23469	4.18863	3.94542	4.13959	3.78213	3.96791	3.47494
29	4.61809	4.35931	4.6212	4.43795	4.32801	4.5989	4.56683	4.44741	4.69476	4.665	4.3326	4.32239	4.04198	3.21752	3.87245	4.08996	3.898	3.94889	4.09136	3.79057	3.72805	3.59817	3.80319	3.70718	3.80589	3.52902	4.72566	4.19517	4.30337	3.91028	3.85029	3.92076	3.8292	4.10944	4.37749	4.0841	4.24115	4.19544	3.94744	4.14235	3.78635	3.97251	3.47625
29.3333	4.62742	4.37373	4.63505	4.44616	4.33821	4.60539	4.57674	4.45337	4.71941	4.68037	4.34585	4.34076	4.04762	3.22319	3.8804	4.09888	3.90414	3.95005	4.09832	3.79598	3.73111	3.59944	3.80619	3.71333	3.81128	3.53322	4.72662	4.19571	4.30549	3.90998	3.85355	3.92426	3.83218	4.12164	4.38218	4.08773	4.24437	4.19789	3.95293	4.15143	3.78696	3.97624	3.47789
29.6667	4.6372	4.37752	4.63958	4.45957	4.3489	4.61761	4.58229	4.46006	4.78061	4.71519	4.39088	4.35017	4.05156	3.23026	3.88657	4.10361	3.90706	3.95438	4.10388	3.79718	3.73417	3.60103	3.81008	3.72009	3.81517	3.53871	4.72759	4.19734	4.30893	3.91436	3.85207	3.92861	3.83605	4.13242	4.38869	4.09163	4.24787	4.20522	3.95553	4.15609	3.79027	3.9794	3.4815
30	4.64743	4.38282	4.64648	4.46774	4.35474	4.6255	4.58928	4.47293	4.73601	4.68486	4.34152	4.3433	4.0586	3.2239	3.88275	4.12081	3.91086	3.95207	4.10861	3.79057	3.73844	3.60419	3.81607	3.7256	3.81905	3.54161	4.73145	4.19897	4.31079	3.91377	3.85148	3.93442	3.83813	4.1418	4.39284	4.09414	4.25082	4.20576	3.95726	4.15966	3.78936	3.98398	3.48248
30.3333	4.66216	4.3929	4.65551	4.47812	4.36184	4.63386	4.59458	4.47293	4.73204	4.68108	4.3405	4.3405	4.06057	3.23697	3.89888	4.11554	3.91785	3.96043	4.11665	3.80109	3.74027	3.60704	3.81756	3.73203	3.82204	3.54611	4.73434	4.20196	4.31422	3.91319	3.85207	3.94455	3.82652	4.17472	4.39596	4.09693	4.25323	4.21281	3.95755	4.16323	3.79237	3.98684	3.48576
30.6667	4.66926	4.39767	4.66239	4.48502	4.3669	4.64196	4.60275	4.48009	4.74906	4.68934	4.34508	4.34712	4.06814	3.23238	3.89419	4.12883	3.91989	3.95784	4.12108	3.79598	3.74393	3.60831	3.82085	3.73692	3.82473	3.54804	4.73506	4.20495	4.31766	3.91465	3.85148	3.94369	3.84199	4.16377	4.4027	4.09971	4.25699	4.21389	3.95899	4.16679	3.79478	3.9897	3.48739
31	4.67754	4.40646	4.66974	4.49708	4.375	4.64672	4.60659	4.4897	4.78869	4.7255	4.36943	4.36994	4.07375	3.23591	3.90502	4.13297	3.92513	3.96158	4.12717	3.79658	3.74698	3.6102	3.82323	3.7421	3.82711	3.55286	4.73579	4.20305	4.31766	3.91494	3.85148	3.94831	3.84496	4.17253	4.40374	4.10194	4.25484	4.21795	3.96043	4.17035	3.79628	3.99228	3.49132
31.3333	4.68344	4.41022	4.67683	4.50518	4.38106	4.65409	4.61354	4.49044	4.80735	4.72035	4.37676	4.35981	4.07627	3.24928	3.92076	4.12938	3.92861	3.96705	4.13352	3.80499	3.7488	3.61305	3.82681	3.74941	3.83069	3.55704	4.73555	4.20549	4.32004	3.91756	3.85178	3.9538	3.84822	4.18455	4.40659	4.10361	4.26074	4.222	3.96273	4.17581	3.79779	3.99371	3.49295
31.6667	4.6957	4.41398	4.68462	4.51156	4.38559	4.65931	4.61162	4.49216	4.80321	4.72737	4.37323	4.37222	4.0813	3.24471	3.91581	4.14372	3.93065	3.96388	4.13794	3.79748	3.75397	3.61462	3.8292	3.75488	3.83188	3.5596	4.73651	4.20712	4.31977	3.91815	3.85237	3.95899	3.85059	4.19272	4.40736	4.10305	4.26315	4.22606	3.96302	4.17773	3.79899	3.99713	3.49524
32	4.69899	4.41648	4.6924	4.52135	4.39063	4.66595	4.61857	4.50248	4.78754	4.71215	4.35753	4.36513	4.08745	3.24682	3.92367	4.1462	3.93558	3.96705	4.1451	3.79598	3.75519	3.61589	3.83128	3.76005	3.83515	3.56441	4.7394	4.20901	4.32321	3.91727	3.85296	3.96273	3.85622	4.20006	4.40995	4.10472	4.26636	4.22794	3.96245	4.17827	3.79839	4.00084	3.4972
32.3333	4.70933	4.42298	4.6957	4.5277	4.39868	4.67541	4.62264	4.50371	4.8108	4.7276	4.36463	4.375	4.0908	3.2577	3.93732	4.14207	3.94311	3.97079	4.14895	3.80379	3.7561	3.61683	3.83456	3.7652	3.83783	3.56952	4.7394	4.21037	4.32268	3.91989	3.85148	3.96935	3.85622	4.21064	4.4115	4.10916	4.26475	4.23091	3.96273	4.18209	3.79899	4.00255	3.49556
32.6667	4.71262	4.43172	4.69993	4.53258	4.40119	4.67612	4.62861	4.50739	4.82502	4.73788	4.37171	4.38282	4.09498	3.26644	3.94426	4.14565	3.94831	3.97222	4.15335	3.80769	3.75853	3.61904	3.83723	3.77035	3.84229	3.57208	4.74157	4.21199	4.32637	3.92193	3.85207	3.97682	3.8411	4.23738	4.41305	4.10639	4.2701	4.23522	3.96446	4.18237	3.79989	4.0054	3.50143
33	4.72105	4.43571	4.70557	4.53769	4.40546	4.68203	4.63004	4.5096	4.84308	4.74534	4.37954	4.38761	4.10083	3.2598	3.93703	4.15582	3.94831	3.96935	4.15445	3.80049	3.75974	3.61841	3.83902	3.7773	3.84407	3.57495	4.73964	4.21064	4.32716	3.92106	3.85326	3.97538	3.8577	4.22254	4.4128	4.10833	4.27037	4.23495	3.96446	4.18509	3.80079	4.00683	3.50013
33.3333	4.7276	4.44542	4.7105	4.54791	4.41248	4.68722	4.63434	4.5096	4.86608	4.74021	4.3861	4.37095	4.10583	3.26155	3.94253	4.15609	3.95236	3.97194	4.16213	3.79658	3.76369	3.62062	3.8408	3.78243	3.84614	3.57687	4.74036	4.21335	4.32874	3.92396	3.85207	3.97882	3.86213	4.22821	4.4159	4.1075	4.27304	4.23926	3.96504	4.18809	3.79929	4.00939	3.49948
33.6667	4.73274	4.44741	4.71543	4.55423	4.41823	4.69593	4.63386	4.51033	4.84445	4.73788	4.37449	4.38055	4.10805	3.26574	3.94802	4.15829	3.95611	3.97337	4.16514	3.79929	3.76369	3.62219	3.84555	3.78605	3.84763	3.57878	4.74277	4.21687	4.3298	3.92426	3.85296	3.98083	3.86331	4.23603	4.41564	4.10944	4.2725	4.24142	3.96446	4.19054	3.80019	4.01081	3.50013
34	4.73671	4.45262	4.72246	4.5569	4.42049	4.69805	4.64029	4.51278	4.86131	4.74906	4.38181	4.38635	4.10889	3.38311	3.96532	4.15362	3.95726	3.97739	4.1687	3.80739	3.76732	3.6244	3.84703	3.78997	3.8497	3.58197	4.74229	4.21497	4.32954	3.92455	3.85444	3.98856	3.8639	4.24303	4.41822	4.11027	4.27491	4.2441	3.96417	4.19245	3.80139	4.01166	3.50176
34.3333	4.74603	4.4618	4.7248	4.56538	4.42548	4.70416	4.64101	4.51621	4.92164	4.76834	4.40972	4.39013	4.1136	3.37535	3.95985	4.16377	3.95928	3.97395	4.17308	3.79929	3.76884	3.62534	3.84792	3.79237	3.85207	3.58515	4.74181	4.2166	4.33085	3.92658	3.85326	3.99085	3.86597	4.24652	4.41822	4.11138	4.27304	4.24572	3.96331	4.19272	3.80049	4.01422	3.50274
34.6667	4.7486	4.46427	4.7276	4.57022	4.43197	4.70675	4.64101	4.51719	4.89732	4.76347	4.39617	4.40044	4.11471	3.38682	3.97366	4.15692	3.96187	3.98054	4.17854	3.80829	3.77035	3.62723	3.85	3.79748	3.85296	3.58674	4.74253	4.21714	4.33375	3.92658	3.85592	3.99485	3.86597	4.25565	4.41925	4.11083	4.27677	4.24572	3.96446	4.19408	3.80139	4.01451	3.50241
35	4.75557	4.46873	4.73391	4.57457	4.43571	4.71262	4.64458	4.51352	4.88761	4.7465	4.38862	4.37651	4.11942	3.37974	3.96877	4.17171	3.96446	3.97624	4.17991	3.80049	3.77307	3.62786	3.85444	3.79779	3.8571	3.58992	4.74445	4.21903	4.33217	3.92716	3.85414	3.99799	3.86921	4.25806	4.42029	4.11138	4.27838	4.25001	3.96216	4.19816	3.80379	4.0165	3.50241
35.3333	4.75999	4.47169	4.73694	4.57674	4.43621	4.7159	4.64791	4.51866	4.89122	4.76347	4.39038	4.39994	4.12192	3.38277	3.97395	4.1698	3.96849	3.97882	4.18155	3.79929	3.77458	3.63006	3.85414	3.80229	3.85888	3.59214	4.74493	4.22119	4.33664	3.92861	3.85503	4.00227	3.87216	4.26475	4.42132	4.11444	4.28104	4.2476	3.96446	4.20115	3.80199	4.02019	3.50502
35.6667	4.76602	4.47639	4.74324	4.58229	4.43895	4.71754	4.64791	4.51866	4.91129	4.76068	4.39968	4.38635	4.12247	3.39254	3.98856	4.16131	3.97107	3.98341	4.187	3.80649	3.7764	3.63226	3.85681	3.80439	3.86124	3.59341	4.74493	4.22146	4.33559	3.92919	3.85562	4.00084	3.87157	4.26903	4.42261	4.11388	4.27891	4.24706	3.96158	4.2006	3.80229	4.01933	3.50209
36	4.76973	4.47515	4.7458	4.58591	4.44417	4.72246	4.64625	4.52208	4.87901	4.75022	4.38408	4.39642	4.12385	3.39523	3.99256	4.16487	3.9728	3.98484	4.19109	3.80739	3.77942	3.63131	3.86006	3.80799	3.86095	3.59564	4.74998	4.22254	4.33691	3.93123	3.85681	4.00768	3.87039	4.27731	4.42416	4.11277	4.28317	4.24867	3.9636	4.2025	3.80439	4.02359	3.50469
36.3333	4.77621	4.48428	4.75232	4.59169	4.44591	4.72433	4.651	4.51866	4.93263	4.77112	4.41047	4.39818	4.12772	3.3912	3.98455	4.17909	3.97452	3.97968	4.19462	3.79929	3.77972	3.63383	3.86302	3.81098	3.86302	3.59722	4.74902	4.22363	4.33822	3.93297	3.85622	4.00654	3.87422	4.27864	4.42545	4.11333	4.2853	4.2527	3.96475	4.2063	3.80229	4.02501	3.50534
36.6667	4.77691	4.4828	4.75488	4.59385	4.45088	4.72667	4.65195	4.51596	4.93061	4.77922	4.4032	4.42024	4.13021	3.3912	3.99228	4.18018	3.97538	3.98427	4.19653	3.79839	3.78243	3.63571	3.86331	3.81487	3.86597	3.59913	4.75238	4.22606	4.34033	3.93413	3.8574	4.01109	3.87304	4.28903	4.42545	4.11277	4.2869	4.25297	3.96475	4.20332	3.80379	4.02557	3.50534
37	4.78153	4.48724	4.76068	4.60011	4.45287	4.73064	4.64981	4.52086	4.94762	4.77968	4.41948	4.40621	4.13132	3.39456	3.99485	4.18073	3.97739	3.9837	4.19979	3.79809	3.78334	3.63697	3.86567	3.81756	3.86685	3.60071	4.75142	4.2266	4.34164	3.93761	3.85858	4.01024	3.8754	4.29036	4.42699	4.11527	4.28557	4.25431	3.96417	4.20684	3.80259	4.02784	3.50729
37.3333	4.78754	4.49118	4.76509	4.60203	4.45684	4.73601	4.65338	4.51841	4.87991	4.74813	4.37575	4.39692	4.13132	3.40463	4.00853	4.1739	3.9794	3.99028	4.20277	3.80888	3.78274	3.63602	3.86744	3.82144	3.86744	3.60388	4.75526	4.22956	4.34138	3.93848	3.85917	4.01536	3.87658	4.29435	4.42725	4.11527	4.2885	4.25699	3.96705	4.20793	3.80409	4.02841	3.50762
37.6667	4.78823	4.49142	4.76579	4.60707	4.45882	4.73694	4.65219	4.5211	4.92298	4.77042	4.40119	4.41923	4.13518	3.39557	4.00113	4.18455	3.98312	3.9837	4.20576	3.80079	3.78575	3.63885	3.87039	3.82413	3.86892	3.60546	4.7543	4.23118	4.34663	3.93992	3.85947	4.01962	3.87717	4.29647	4.42905	4.11471	4.28929	4.25726	3.96504	4.20928	3.80439	4.02954	3.50892
38	4.79215	4.49806	4.7695	4.6121	4.46031	4.74114	4.65551	4.52086	4.96256	4.78546	4.42748	4.41573	4.13766	3.39825	4.00654	4.18591	3.98513	3.9877	4.20983	3.79989	3.78726	3.63947	3.86921	3.82681	3.87216	3.60641	4.75478	4.2328	4.34716	3.94079	3.86213	4.0199	3.87687	4.30284	4.42777	4.11748	4.28743	4.25699	3.96388	4.21091	3.80619	4.03096	3.50892
38.3333	4.79653	4.5042	4.77436	4.61905	4.4613	4.74137	4.65456	4.52281	4.90769	4.75906	4.38736	4.41173	4.13876	3.39993	4.00825	4.18782	3.98742	3.9897	4.21226	3.79388	3.78786	3.64073	3.87098	3.83069	3.8754	3.60799	4.75502	4.23415	4.34978	3.94282	3.86154	4.02189	3.87717	4.30628	4.42931	4.11388	4.29222	4.25779	3.96388	4.21281	3.80559	4.03237	3.51087
38.6667	4.79838	4.50469	4.77575	4.62431	4.46502	4.74464	4.6567	4.5211	4.87855	4.74743	4.38257	4.40395	4.14097	3.40194	4.01195	4.18836	3.98856	3.99113	4.21497	3.79508	3.78786	3.64167	3.87304	3.83426	3.87569	3.61083	4.75646	4.23711	4.35057	3.94282	3.86036	4.02416	3.8804	4.30973	4.43163	4.11582	4.29222	4.25913	3.96762	4.2147	3.80589	4.03492	3.51249
39	4.80344	4.50445	4.78107	4.62646	4.46625	4.74766	4.65623	4.51572	4.88218	4.74836	4.38257	4.40119	4.14042	3.41567	4.02416	4.18346	3.99085	3.99313	4.22146	3.80589	3.78997	3.64229	3.87452	3.83902	3.87834	3.61241	4.75838	4.23765	4.35135	3.94542	3.8639	4.02756	3.88158	4.31131	4.43086	4.11721	4.29461	4.25967	3.9659	4.21389	3.80769	4.03576	3.51249
39.3333	4.80344	4.50813	4.78153	4.62885	4.46848	4.75395	4.65433	4.52306	5.00911	4.79999	4.4377	4.43197	4.14372	3.40731	4.01536	4.19462	3.99085	3.99028	4.2239	3.79779	3.79147	3.64323	3.87569	3.84436	3.88158	3.61273	4.76126	4.24034	4.3524	3.94687	3.86361	4.02926	3.88187	4.32057	4.43343	4.11527	4.29435	4.26181	3.96849	4.21633	3.80858	4.03605	3.51314
39.6667	4.80666	4.5096	4.78523	4.63648	4.46897	4.75557	4.65884	4.51792	4.92904	4.77274	4.40069	4.42798	4.14868	3.40898	4.02104	4.19353	3.99256	3.99085	4.22902	3.79568	3.79388	3.64386	3.87569	3.84644	3.88275	3.61683	4.76197	4.24384	4.35685	3.94629	3.8639	4.03124	3.88187	4.32479	4.43266	4.11721	4.29381	4.26529	3.96877	4.21633	3.80858	4.03774	3.51477
40	4.81264	4.51743	4.78915	4.64482	4.47417	4.75673	4.66097	4.52379	4.94583	4.76509	4.41097	4.41473	4.14648	3.42001	4.03463	4.18618	3.99628	3.99799	4.23145	3.80499	3.79418	3.64417	3.87805	3.85029	3.88216	3.61809	4.76221	4.24357	4.35895	3.94889	3.86479	4.03067	3.88451	4.32716	4.43472	4.12025	4.29594	4.26395	3.96877	4.21524	3.80589	4.03859	3.51444
40.3333	4.82273	4.51768	4.79146	4.64125	4.47812	4.75743	4.6567	4.51939	4.959	4.78176	4.41097	4.4387	4.1517	3.41166	4.02614	4.19789	3.9977	3.99399	4.23576	3.79688	3.79538	3.64511	3.87893	3.85326	3.88451	3.61904	4.76868	4.24679	4.35764	3.95062	3.86774	4.03237	3.8854	4.33138	4.43343	4.11582	4.29541	4.26609	3.96906	4.22011	3.80858	4.04113	3.51542
40.6667	4.82204	4.51841	4.794	4.64839	4.47812	4.76092	4.65931	4.51768	4.96367	4.78777	4.41348	4.44169	4.15088	3.42201	4.04	4.19217	4.00141	3.99799	4.23899	3.80499	3.79779	3.64668	3.88011	3.8574	3.88598	3.61999	4.76581	4.24894	4.36026	3.95264	3.86744	4.03718	3.88481	4.33691	4.43523	4.11665	4.297	4.26689	3.96561	4.22146	3.81098	4.04339	3.51769
41	4.82479	4.52379	4.80022	4.65219	4.48009	4.76532	4.66073	4.51939	4.95877	4.77066	4.41323	4.41823	4.1539	3.41633	4.03067	4.2025	4.00227	3.99513	4.23765	3.79809	3.79839	3.64605	3.88187	3.85858	3.88833	3.62377	4.76892	4.24948	4.3613	3.9538	3.86833	4.03803	3.88598	4.34217	4.43729	4.11748	4.29806	4.26636	3.96762	4.22146	3.81038	4.04508	3.51834
41.3333	4.8312	4.52428	4.80091	4.65338	4.48157	4.76764	4.66287	4.51743	4.90679	4.75534	4.38685	4.42473	4.1539	3.42834	4.04621	4.19381	4.00569	3.99799	4.24249	3.80469	3.80019	3.6473	3.88334	3.86242	3.88833	3.62565	4.77203	4.25136	4.36287	3.95466	3.8698	4.0417	3.88833	4.34506	4.43729	4.11804	4.29806	4.26716	3.96964	4.22417	3.81278	4.04508	3.51671
41.6667	4.83418	4.52526	4.80551	4.65884	4.4833	4.77297	4.66263	4.51866	4.98101	4.77783	4.42498	4.42748	4.15994	3.41934	4.03689	4.20359	4.00512	3.99628	4.24276	3.79869	3.79959	3.6473	3.88481	3.8639	3.89214	3.62911	4.77274	4.24975	4.3647	3.95495	3.86833	4.04226	3.8898	4.34873	4.43755	4.12025	4.30045	4.2693	3.96734	4.22552	3.81218	4.04621	3.51834
42	4.83738	4.53087	4.80942	4.66334	4.48921	4.77691	4.66239	4.51474	4.95186	4.77829	4.41097	4.4397	4.15966	3.43166	4.05185	4.19816	4.00796	4.00027	4.24599	3.80739	3.80229	3.64824	3.88804	3.86685	3.89449	3.63131	4.77418	4.25404	4.36549	3.95985	3.87216	4.04424	3.89009	4.35424	4.44037	4.12108	4.30072	4.26983	3.97021	4.22633	3.81397	4.04818	3.51963
42.3333	4.84422	4.53184	4.81172	4.66737	4.4897	4.78061	4.66239	4.51963	4.91512	4.76115	4.39239	4.42723	4.16131	3.42567	4.04226	4.20495	4.00768	3.99685	4.24867	3.79929	3.80169	3.64855	3.88774	3.87098	3.89742	3.63351	4.77681	4.25431	4.36653	3.95784	3.87216	4.04706	3.88862	4.36392	4.4414	4.12136	4.30151	4.27197	3.97165	4.22606	3.81308	4.04903	3.52061
42.6667	4.84377	4.53818	4.817	4.66784	4.49413	4.78361	4.66192	4.51963	5.10744	4.8522	4.49462	4.46873	4.16377	3.43432	4.05944	4.19816	4.01081	4.00398	4.24975	3.80469	3.80409	3.6498	3.89126	3.87275	3.89917	3.63446	4.7811	4.25538	4.3681	3.96129	3.87304	4.05241	3.89273	4.36261	4.44371	4.12025	4.30204	4.27197	3.96992	4.22929	3.81457	4.04847	3.52061
43	4.84719	4.53672	4.81654	4.67163	4.49634	4.78592	4.6669	4.5167	4.93509	4.76532	4.39843	4.43297	4.16706	3.43498	4.06337	4.20142	4.01365	4.00227	4.25189	3.80918	3.80709	3.64949	3.89244	3.87393	3.9018	3.63665	4.7811	4.2586	4.36941	3.96273	3.87452	4.05128	3.89244	4.36836	4.4414	4.12302	4.30363	4.27197	3.96992	4.23037	3.81457	4.05044	3.52158
43.3333	4.85243	4.5394	4.8209	4.67447	4.49782	4.78915	4.66808	4.51939	4.98523	4.79377	4.42473	4.4489	4.16952	3.43698	4.06534	4.2006	4.01507	4.00426	4.25511	3.80769	3.80649	3.65105	3.89361	3.87687	3.90473	3.63947	4.7842	4.25833	4.37149	3.96417	3.87658	4.05438	3.89449	4.37593	4.445	4.12385	4.30655	4.27224	3.97194	4.23172	3.81487	4.0541	3.52255
43.6667	4.85516	4.54208	4.82319	4.67943	4.50101	4.79284	4.66642	4.51915	4.94851	4.76022	4.40872	4.42199	4.17308	3.43066	4.05747	4.21308	4.01536	4.00198	4.25565	3.80079	3.80739	3.65418	3.89654	3.8804	3.9056	3.64135	4.78754	4.2594	4.37384	3.96647	3.87569	4.05579	3.89625	4.3801	4.44243	4.12524	4.30761	4.27304	3.97337	4.23334	3.81816	4.0541	3.5219
44	4.86017	4.55131	4.82617	4.68368	4.50616	4.79607	4.66997	4.51817	4.95543	4.77621	4.40646	4.44169	4.1739	3.43033	4.06	4.21037	4.01763	4.0017	4.25779	3.80109	3.80948	3.65324	3.89712	3.88069	3.90736	3.64135	4.78802	4.26181	4.37463	3.96532	3.87658	4.05775	3.89449	4.38635	4.44628	4.12441	4.30999	4.27784	3.97308	4.23442	3.81607	4.05466	3.52255
44.3333	4.86494	4.54864	4.82708	4.68627	4.51082	4.79607	4.66997	4.52306	4.95364	4.76254	4.41248	4.42348	4.17226	3.43963	4.07235	4.20467	4.01848	4.00626	4.25994	3.80978	3.81128	3.65324	3.89859	3.88451	3.90823	3.64511	4.78849	4.26342	4.37645	3.96992	3.87805	4.06113	3.89566	4.38791	4.44705	4.12524	4.31052	4.27757	3.97596	4.23549	3.81607	4.05607	3.52223
44.6667	4.8654	4.55908	4.83006	4.69122	4.5118	4.79884	4.66808	4.51743	4.99564	4.78292	4.42648	4.44019	4.17527	3.4446	4.07711	4.20359	4.02075	4.00683	4.26368	3.81038	3.81248	3.6548	3.90122	3.89009	3.90969	3.64574	4.79254	4.26288	4.37906	3.96992	3.87922	4.06197	3.89888	4.39154	4.44602	4.12634	4.31422	4.26582	3.98169	4.2301	3.81607	4.05888	3.51639
45	4.87039	4.5615	4.83509	4.69334	4.51425	4.80183	4.67163	4.51719	4.9748	4.78592	4.41698	4.44741	4.17991	3.43532	4.06618	4.21957	4.02274	4.00512	4.26529	3.80499	3.81427	3.65543	3.90239	3.89244	3.91203	3.64793	4.79254	4.26743	4.38166	3.97308	3.88216	4.06899	3.89976	4.39518	4.44654	4.12689	4.3129	4.28424	3.9771	4.24249	3.81876	4.05944	3.52708
45.3333	4.88037	4.56053	4.83509	4.69829	4.5189	4.80321	4.67636	4.51963	4.9659	4.77367	4.42348	4.43097	4.17882	3.44593	4.08047	4.20793	4.02501	4.0091	4.26903	3.80799	3.81517	3.65605	3.90414	3.89419	3.91348	3.65012	4.7954	4.2701	4.38426	3.97567	3.88069	4.06871	3.89888	4.40218	4.44833	4.12772	4.31528	4.27944	3.97796	4.24249	3.82025	4.06028	3.52611
45.6667	4.8824	4.56489	4.836	4.70064	4.52159	4.80482	4.67234	4.5189	4.93957	4.76996	4.40621	4.4382	4.18346	3.44924	4.08522	4.20956	4.02756	4.01166	4.27117	3.81128	3.81846	3.65574	3.9059	3.89829	3.91581	3.65199	4.79849	4.27224	4.38556	3.97682	3.88393	4.06899	3.89946	4.40762	4.44936	4.128	4.31713	4.28131	3.97653	4.24142	3.81965	4.06057	3.52482
46	4.88059	4.56538	4.84286	4.70276	4.52452	4.80919	4.67636	4.52183	4.97813	4.78315	4.42873	4.43546	4.18591	3.44096	4.07459	4.22254	4.02841	4.00768	4.27411	3.80858	3.81935	3.6573	3.90794	3.89917	3.91698	3.65199	4.80206	4.27197	4.38739	3.97882	3.88393	4.07291	3.9018	4.40866	4.4491	4.12966	4.31793	4.2709	3.98541	4.2363	3.81756	4.06394	3.51931
46.3333	4.88308	4.57118	4.84354	4.70557	4.53063	4.81539	4.67565	4.51866	4.94739	4.77644	4.41147	4.44194	4.18673	3.45188	4.08801	4.21254	4.03124	4.01252	4.27677	3.81427	3.82234	3.65886	3.90911	3.90444	3.91902	3.6548	4.80372	4.27704	4.38661	3.97968	3.88422	4.07571	3.9018	4.41874	4.45038	4.12911	4.31845	4.27197	3.98341	4.23603	3.81756	4.06562	3.52028
46.6667	4.89077	4.57553	4.84673	4.7091	4.52819	4.8147	4.68085	4.51915	4.98057	4.785	4.43272	4.43795	4.19081	3.44328	4.08074	4.22254	4.03209	4.00967	4.27997	3.80589	3.82294	3.65917	3.91086	3.90794	3.92018	3.65636	4.80728	4.27651	4.39154	3.97997	3.88628	4.07879	3.90297	4.4208	4.45192	4.12855	4.31925	4.28823	3.98226	4.24679	3.82204	4.06478	3.52999
47	4.89303	4.57698	4.84924	4.71496	4.53355	4.81654	4.67636	4.51915	4.99032	4.79861	4.43072	4.46081	4.19245	3.44361	4.08326	4.2239	4.03294	4.01308	4.28131	3.80679	3.82413	3.65979	3.91203	3.91057	3.92222	3.65948	4.80775	4.27864	4.39518	3.98255	3.88745	4.07963	3.90531	4.42442	4.45243	4.13021	4.32057	4.28211	3.97882	4.24679	3.82115	4.06618	3.52902
47.3333	4.8989	4.57843	4.85152	4.71543	4.53501	4.81677	4.67659	4.52355	4.99696	4.78846	4.43422	4.43994	4.19272	3.45155	4.09749	4.21849	4.03803	4.01621	4.28663	3.81278	3.8289	3.66073	3.91436	3.91436	3.92687	3.66291	4.80941	4.28051	4.39622	3.98455	3.88833	4.08326	3.9056	4.42674	4.45397	4.13021	4.32083	4.28317	3.98169	4.24599	3.82144	4.06814	3.52999
47.6667	4.90026	4.58784	4.85744	4.71918	4.53477	4.8209	4.68132	4.5233	4.92635	4.76927	4.4027	4.44218	4.19435	3.45453	4.09888	4.21876	4.03859	4.01706	4.29009	3.81666	3.8283	3.66229	3.91407	3.91785	3.92774	3.6626	4.80823	4.28237	4.39752	3.98513	3.89038	4.08326	3.90706	4.43266	4.45346	4.13132	4.32162	4.28264	3.98284	4.24814	3.82204	4.07011	3.53031
48	4.90589	4.58663	4.85812	4.72035	4.53599	4.8225	4.6799	4.52183	4.99741	4.79261	4.43696	4.44492	4.1987	3.44891	4.08884	4.22902	4.04028	4.01394	4.29116	3.81337	3.8295	3.66322	3.91669	3.92047	3.92978	3.66665	4.81297	4.28504	4.40063	3.98856	3.89273	4.0908	3.90765	4.43575	4.45371	4.13049	4.32453	4.27677	3.99142	4.24357	3.82115	4.07207	3.52546
