# Supplementary material for: CRISPR-based herd immunity can limit phage epidemics in bacterial populations
Source: eLife. 2018 Mar 9;7:e32035. doi: 10.7554/eLife.32035 (PMC5922976; doi:10.7554/eLife.32035)
Supplement: Figure 7—source data 1. [file elife-32035-fig7-data1.xlsx]

## Sheet: Radius-slope 10s
t (h)	Radius [mm]						t (h)	Slope
2.66667							2.66667
3							3
3.33333							3.33333
3.66667			0.589106	0.625505			3.66667
4	0.571223		0.719203	0.740406	0.678071		4
4.33333	0.624648		0.799269	0.837092	0.785319		4.33333	0.107475	0.146724	0.210279	0.198938	0.192282
4.66667	0.654963		0.874544	0.910457	0.863095		4.66667	0.104769	0.142451	0.203647	0.18886	0.182466
5	0.697152	0.590858	0.946175	0.973806	0.92491		5	0.1047	0.13818	0.196786	0.179306	0.174595
5.33333	0.730711	0.646194	1.00398	1.03221	0.989568		5.33333	0.10128	0.133573	0.190272	0.170828	0.166866
5.66667	0.758294	0.702044	1.06696	1.08238	1.04498		5.66667	0.0975618	0.129697	0.183901	0.163354	0.159502
6	0.805002	0.738476	1.1215	1.12936	1.09052		6	0.0956783	0.125346	0.178486	0.156763	0.152485
6.33333	0.82322	0.789258	1.17257	1.17539	1.14201		6.33333	0.0913538	0.120763	0.163431	0.139352	0.145862
6.66667	0.855835	0.83012	1.23142	1.21516	1.17915		6.66667	0.0843465	0.116352	0.152201	0.125274	0.129879
7	0.898751	0.869064	1.27551	1.24836	1.22241		7	0.0799983	0.111607	0.142287	0.114074	0.116535
7.33333	0.908849	0.903814	1.31896	1.28242	1.25542		7.33333	0.0726778	0.107579	0.13247	0.103805	0.104584
7.66667	0.927488	0.939708	1.35777	1.3156	1.28586		7.66667	0.0655529	0.0991522	0.123567	0.0946294	0.0928378
8	0.963684	0.968408	1.40262	1.34797	1.31308		8	0.0603281	0.0913664	0.114703	0.0855151	0.0822382
8.33333	0.958937	0.993989	1.43379	1.36993	1.33809		8.33333	0.0519608	0.0843756	0.106125	0.0766601	0.0727707
8.66667	0.978954	1.01893	1.45825	1.39075	1.35614		8.66667	0.0485527	0.0796951	0.0975821	0.0684023	0.063341
9	1.01106	1.03669	1.49492	1.41282	1.36751		9	0.0409448	0.0772028	0.0894381	0.0607288	0.0555927
9.33333	1.00085	1.0617	1.51621	1.42761	1.38358		9.33333	0.0364371	0.0772855	0.0822759	0.0550542	0.0490171
9.66667	1.00767	1.07981	1.54295	1.44683	1.39471		9.66667	0.0304622	0.0769372	0.0777389	0.052438	0.0450616
10	1.03889	1.09867	1.56852	1.45293	1.40576		10	0.0267952	0.0766167	0.0733145	0.0489429	0.0425745
10.3333	1.01781	1.11311	1.58604	1.46279	1.41907		10.3333	0.0203394	0.0753999	0.0684899	0.0454685	0.0404128
10.6667	1.0617	1.16126	1.60337	1.47408	1.42451		10.6667	0.0187128	0.0728353	0.064489	0.0425878	0.038589
11	1.03117	1.19325	1.62324	1.48081	1.4361		11	0.0129916	0.0685741	0.0597463	0.0390206	0.036923
11.3333	1.0617	1.23829	1.63612	1.50524	1.45217		11.3333	0.0102173	0.0636024	0.0541401	0.036009	0.0351524
11.6667	1.02674	1.25112	1.67814	1.54724	1.47483		11.6667	0.00762049	0.0581355	0.0492509	0.032967	0.032742
12	1.0617	1.27013	1.69126	1.54367	1.49271		12	0.00332633	0.0527752	0.0436881	0.0298289	0.0303306
12.3333	1.03117	1.27461	1.69909	1.54581	1.49788		12.3333	-0.000868967	0.0464781	0.0381821	0.0268084	0.0275935
12.6667	1.0617	1.27729	1.70946	1.55081	1.50304		12.6667	1.17299e-05	0.040579	0.0329452	0.0246671	0.0246202
13	1.03448	1.27551	1.71205	1.54867	1.50524		13	-0.00393406	0.0337463	0.0275471	0.0219521	0.0217304
13.3333	1.05739	1.28175	1.71656	1.55863	1.50891		13.3333	-0.00362738	0.0293153	0.0223295	0.0191458	0.0181497
13.6667	1.03448	1.29591	1.72234	1.55863	1.51183		13.6667	-0.0039608	0.0262887	0.0172218	0.0158216	0.0144053
14	1.03006	1.30818	1.72491	1.56288	1.51548		14	-0.00327108	0.0259063	0.0121397	0.0137032	0.0110836
14.3333	1.02785	1.31427	1.72683	1.56288	1.51913		14.3333	-0.00604154	0.0257345	0.0101004	0.0149818	0.00922371
14.6667	1.05415	1.33323	1.72875	1.58395	1.52276		14.6667	-0.00336915	0.0263909	0.00838516	0.0155115	0.00830449
15	1.02451	1.34176	1.73131	1.58604	1.52639		15	-0.00545125	0.0271764	0.00694061	0.0154614	0.00743843
15.3333	1.02451	1.34939	1.73577	1.59091	1.52856		15.3333	-0.00179873	0.0271685	0.00594211	0.0153681	0.00668246
15.6667	1.04655	1.35782	1.73449	1.59508	1.52928		15.6667	-0.0029331	0.0262435	0.00498215	0.0145457	0.00574135
16	1.02562	1.36202	1.73704	1.59854	1.53		16	6.422e-05	0.0246322	0.0039881	0.0132953	0.00472701
16.3333	1.02005	1.3687	1.73958	1.60406	1.53289		16.3333	-0.000804292	0.0231452	0.00365183	0.0117259	0.00362411
16.6667	1.04218	1.37453	1.73768	1.60819	1.53217		16.6667	0.000427841	0.0220039	0.00312856	0.010144	0.00273776
17	1.01893	1.38692	1.73895	1.60887	1.53289		17	-0.00116764	0.0205914	0.00268542	0.00802284	0.00197262
17.3333	1.04872	1.39185	1.73831	1.61231	1.53361		17.3333	0.000308612	0.0196249	0.0022764	0.00712676	0.00131407
17.6667	1.02228	1.40083	1.74022	1.61573	1.53361		17.6667	0.00130295	0.0185975	0.00187267	0.00616703	0.0007568
18	1.04218	1.4049	1.73895	1.60956	1.53289		18	-0.00039605	0.0176267	0.00208511	0.00547721	0.00034749
18.3333	1.02116	1.40896	1.74339	1.61368	1.53217		18.3333	0.00265946	0.0166911	0.00197499	0.00524815	9.5232e-05
18.6667	1.04872	1.41622	1.74149	1.6171	1.53361		18.6667	0.000644763	0.0154405	0.00196603	0.0050436	-0.000194977
19	1.02116	1.42265	1.74276	1.61915	1.53361		19	-0.00153067	0.0139301	0.00203715	0.00521115	-0.000351956
19.3333	1.02562	1.42265	1.74339	1.61778	1.53289		19.3333	-0.00153223	0.0124238	0.00184438	0.00582348	-0.000489842
19.6667	1.04981	1.42586	1.74276	1.61983	1.53145		19.6667	-0.000543405	0.0119329	0.00189392	0.00572076	-0.000546888
20	1.02228	1.43065	1.74656	1.62256	1.53145		20	0.000364237	0.0114388	0.00154657	0.00623084	-0.000328167
20.3333	1.05198	1.43384	1.74593	1.628	1.53289		20.3333	0.00148171	0.0110866	0.00162106	0.00696092	-0.000356769
20.6667	1.01781	1.43702	1.74593	1.62935	1.53217		20.6667	0.000913721	0.010632	0.00129035	0.00645203	-0.000480518
21	1.02116	1.43781	1.74529	1.63206	1.53072		21	0.00140751	0.00976062	0.00112763	0.00655026	-0.000513748
21.3333	1.02116	1.44177	1.74529	1.6368	1.53145		21.3333	0.00167473	0.00980266	0.00123938	0.00692047	-0.000271182
21.6667	1.05631	1.44966	1.74782	1.63206	1.53145		21.6667	-0.000530709	0.00977671	0.00129731	0.00747547	-0.00026655
22	1.02674	1.45359	1.74529	1.63882	1.53361		22	0.00043932	0.00980852	0.00142603	0.00715441	-0.000471524
22.3333	1.05631	1.45438	1.74909	1.64152	1.53072		22.3333	0.000896501	0.00978855	0.00132951	0.00683723	-0.000566633
22.6667	1.01893	1.45673	1.74719	1.63815	1.53		22.6667	-0.000925238	0.00941041	0.00139221	0.00635332	-0.000642698
23	1.05198	1.45516	1.74529	1.64488	1.53145		23	-0.000221529	0.00894111	0.00102541	0.0060643	-0.000495131
23.3333	1.02228	1.46454	1.75098	1.64891	1.53289		23.3333	-0.0026686	0.00853396	0.000712868	0.00591529	-0.000514183
23.6667	1.02116	1.46376	1.75035	1.65359	1.53		23.6667	-0.00468761	0.00808572	0.000329357	0.00566195	-0.000637903
24	1.05307	1.47076	1.75161	1.65025	1.52783		24	-0.00667711	0.00726403	-1.66184e-05	0.00565431	-0.00073314
24.3333	1.0234	1.47386	1.75098	1.65292	1.53		24.3333	-0.00214204	0.00720071	-0.00057169	0.00477239	-0.000480754
24.6667	1.02451	1.47154	1.74972	1.65292	1.53		24.6667	-0.0031395	0.00720646	-0.00141073	0.00445056	-0.000209527
25	1.02005	1.47308	1.74593	1.65359	1.53072		25	-0.00183928	0.00647445	-0.00176146	0.0040555	-0.000299995
25.3333	1.01781	1.47618	1.74656	1.6576	1.52928		25.3333	-0.00389183	0.00615367	-0.00252631	0.00325988	-0.000185633
25.6667	1.01893	1.48081	1.74656	1.6576	1.52928		25.6667	0.000527169	0.00501591	-0.00346256	0.00264983	0.00017617
26	1.01893	1.4785	1.74719	1.65893	1.52856		26	-0.000705879	0.00475595	-0.00350077	0.00281365	0.000723421
26.3333	1.05415	1.48389	1.74212	1.6576	1.53217		26.3333	-0.00256876	0.00404741	-0.00376995	0.00326909	0.00103742
26.6667	1.0234	1.48543	1.74085	1.66026	1.53		26.6667	0.00245734	0.00385653	-0.00354985	0.00293366	0.000956308
27	1.01556	1.48081	1.74149	1.6596	1.52856		27	0.00152687	0.00406641	-0.0033637	0.00308511	0.00126999
27.3333	1.01331	1.48696	1.73768	1.66159	1.53145		27.3333	0.00049157	0.00373743	-0.00342137	0.00292107	0.00144591
27.6667	1.04981	1.48389	1.7364	1.6596	1.53289		27.6667	-0.00104543	0.00329771	-0.00344737	0.00297935	0.00168839
28	1.01781	1.48773	1.73895	1.66624	1.53361		28	-0.00279693	0.00298601	-0.00313394	0.00320581	0.00172144
28.3333	1.01106	1.48696	1.73513	1.66691	1.53433		28.3333	-0.00102706	0.00298487	-0.00271603	0.00337047	0.00185382
28.6667	1.05307	1.48849	1.73704	1.66359	1.53289		28.6667	-0.00260001	0.00292014	-0.00239623	0.00324758	0.00180067
29	1.01781	1.49232	1.73513	1.66823	1.53577		29	-0.000645125	0.00294981	-0.00207779	0.00290947	0.00161097
29.3333	1.01444	1.49156	1.73131	1.66691	1.53505		29.3333	-0.00141568	0.00312085	-0.00182212	0.00295182	0.00137325
29.6667	1.01219	1.49156	1.73322	1.67088	1.53577		29.6667	-0.00273158	0.00275946	-0.00144927	0.0024134	0.00110144
30	1.01106	1.49232	1.73449	1.67088	1.53577		30	-0.00483545	0.00285951	-0.00132755	0.00250742	0.00080691
30.3333	1.04981	1.49309	1.73386	1.6722	1.53793		30.3333	-0.00335233	0.0026451	-0.00142027	0.00192896	0.000659714
30.6667	1.01556	1.4969	1.73003	1.66956	1.53793		30.6667	-0.0016908	0.00241282	-0.000958404	0.00188951	0.000536327
31	1.01556	1.49461	1.73322	1.67022	1.53361		31	-0.00326316	0.00217954	-0.00079014	0.00204591	0.000137574
31.3333	1.01331	1.49614	1.73258	1.67352	1.53577		31.3333	-0.00127748	0.00219738	-0.000508761	0.00209073	-7.60769e-05
31.6667	1.01444	1.4969	1.73194	1.66956	1.53793		31.6667	-0.00205321	0.0022824	-0.000231234	0.00232053	9.40088e-06
32	1.00767	1.49766	1.73194	1.67616	1.53577		32	-0.00281933	0.00224636	-0.000298489	0.00266552	-0.000180299
32.3333	1.00654	1.49919	1.73003	1.67286	1.53649		32.3333	-0.00363692	0.00246981	-8.39505e-05	0.003346	-0.000237106
32.6667	1.03889	1.4969	1.73258	1.67352	1.53649		32.6667	-0.00453629	0.00270797	0.000302897	0.00354554	-0.000293914
33	1.01219	1.49919	1.73258	1.67616	1.53289		33	-0.00168506	0.00282112	0.000572084	0.00388821	-0.000137343
33.3333	1.0054	1.50223	1.73131	1.68012	1.53649		33.3333	-0.00148654	0.00305623	0.000517216	0.00414122	-0.00013751
33.6667	1.00654	1.50071	1.73258	1.67946	1.53721		33.6667	-0.00132542	0.00267494	0.000609803	0.00426406	-0.000507792
34	1.0088	1.50147	1.73258	1.68406	1.53505		34	-0.00170066	0.00264889	0.000639311	0.00479827	-0.000602637
34.3333	1.00993	1.50602	1.73386	1.68603	1.53577		34.3333	-0.00195759	0.00248309	0.000597306	0.00462441	-0.000403387
34.6667	1.00993	1.50753	1.73449	1.68275	1.53577		34.6667	-0.00226448	0.00239215	0.000538478	0.00468855	-0.000564846
35	1.0088	1.50753	1.73386	1.68471	1.53577		35	-0.00300422	0.00218195	0.000273378	0.00450701	-0.000617149
35.3333	1.01106	1.50678	1.73449	1.68865	1.53361		35.3333	-0.000447283	0.00151581	0.000273392	0.0042169	-0.000621969
35.6667	1.00993	1.50375	1.73322	1.6893	1.53361		35.6667	0.000171351	0.000900413	0.000420413	0.00406122	-0.000626789
36	1.0054	1.50753	1.73322	1.69322	1.53433		36	-5.99138e-05	0.000840228	0.000235359	0.00434566	-0.000569821
36.3333	1.00427	1.50678	1.73322	1.69257	1.53505		36.3333	-0.000320821	0.000420048	0.000361278	0.00455868	-0.000527353
36.6667	1.00993	1.50829	1.73322	1.69126	1.53289		36.6667	-0.000664345	0.000254341	0.000163738	0.00527922	-0.000570069
37	1.00654	1.50678	1.73322	1.69453	1.53289		37	-0.000933722	0.000104678	-2.54338e-05	0.00563753	-0.000574904
37.3333	1.00767	1.50526	1.73386	1.69583	1.53289		37.3333	-0.000918665	0.000104786	9.2292e-05	0.00550741	-0.000532233
37.6667	1.01106	1.5045	1.73577	1.69778	1.53649		37.6667	-0.001053	0.000449123	-7.16486e-05	0.00584558	-0.000318453
38	1.0088	1.50829	1.73386	1.70169	1.53361		38	-0.000612455	0.000429334	1.66805e-05	0.00600388	-0.000413463
38.3333	1.00767	1.50678	1.7364	1.70493	1.53217		38.3333	-0.000725465	-2.01647e-05	-0.00017668	0.00623268	-0.000551303
38.6667	1.00427	1.5098	1.73322	1.70946	1.53289		38.6667	-0.00127935	0.00014465	-0.000189211	0.00637094	-0.000342146
39	1.00313	1.50602	1.73194	1.70687	1.53217		39	-0.00139838	-9.99651e-05	-0.000264798	0.00658639	-0.000123521
39.3333	1.0054	1.50602	1.73449	1.70817	1.53217		39.3333	-0.000987131	-9.9925e-05	-0.000449741	0.00613168	-0.000285125
39.6667	1.00427	1.5098	1.73194	1.71527	1.53361		39.6667	-0.000866863	-1.48906e-05	-0.000563172	0.00557718	-0.000304043
40	1.00767	1.50678	1.73386	1.71334	1.53217		40	-0.000537454	0.000104773	-0.000714535	0.00511101	-0.000199415
40.3333	1.00199	1.50526	1.73194	1.7172	1.53145		40.3333	3.02212e-05	-4.00268e-05	-0.00064322	0.00466191	0.00011879
40.6667	1.00085	1.50829	1.73386	1.71592	1.53433		40.6667	0.000142136	0.000334119	-0.000702081	0.00425789	0.00026143
41	1.00654	1.5045	1.73322	1.72106	1.53361		41	0.000799853	0.000722736	-0.000256588	0.0038854	0.000323208
41.3333	1.00654	1.50526	1.73194	1.71913	1.53145		41.3333	0.000605736	0.00100727	-0.000147192	0.00464598	0.000489525
41.6667	1.00654	1.50753	1.73258	1.71849	1.53289		41.6667	0.000590831	0.000992406	-0.000109329	0.00460188	0.000741025
42	1.00767	1.5098	1.73131	1.7217	1.53433		42	0.000643682	0.000992413	0.000100923	0.00473761	0.000864405
42.3333	1.00654	1.50829	1.73131	1.72363	1.53289		42.3333	0.000472074	0.00130672	7.5718e-05	0.00531254	0.00144283
42.6667	1.00313	1.51056	1.73131	1.72363	1.53361		42.6667	0.000427242	0.00144123	0.000332202	0.00490924	0.00172233
43	1.00993	1.51282	1.73386	1.72363	1.53433		43	-2.17709e-05	0.00148541	0.000172411	0.00524341	0.0018876
43.3333	1.00427	1.50905	1.73322	1.73449	1.53505		43.3333	-0.000418923	0.00191317	0.000311215	0.00489083	0.00221477
43.6667	1.00767	1.5098	1.73386	1.73194	1.53721		43.6667	-0.000231819	0.00180239	0.000450018	0.0053301	0.00238536
44	1.00654	1.51056	1.73322	1.7364	1.53649		44	3.73382e-05	0.00169161	0.000508861	0.00535534	0.00237007
44.3333	1.0054	1.51056	1.73322	1.73768	1.5408		44.3333	0.000276635	0.00160157	0.000433225	0.00516843	0.00241664
44.6667	1.00313	1.51207	1.73449	1.73194	1.54008		44.6667	0.000598111	0.00182985	0.000340678	0.00473681	0.00228875
45	1.00427	1.51358	1.73194	1.73895	1.5408		45	0.000889509	0.00168023	0.000159834	0.00460643	0.00205591
45.3333	1.00654	1.51584	1.73322	1.73577	1.5408		45.3333	0.000411075	0.00171986	-0.000155607	0.00363026	0.00170969
45.6667	1.00767	1.51508	1.73386	1.74212	1.5408		45.6667	0.000769613	0.00196837	-0.000172414	0.00265288	0.00145332
46	1.0088	1.51584	1.73449	1.74276	1.54223		46	0.000694768	0.00197711	-0.000344857	0.00282376	0.00115451
46.3333	1.0088	1.51508	1.73258	1.74466	1.54295		46.3333	0.000934006	0.00191207	-0.000346966	0.0025964	0.00101712
46.6667	1.0088	1.51734	1.73386	1.74212	1.5408		46.6667	0.00111768	0.00182471	-0.00042149	0.00272504	0.00065426
47	1.00993	1.51584	1.73322	1.74656	1.54223		47	0.00117502	0.00158064	-0.000521804	0.00299747	0.000723462
47.3333	1.0054	1.51659	1.73194	1.74022	1.54152		47.3333	0.000741665	0.00135418	-0.000405915	0.00212308	0.000651683
47.6667	1.00767	1.51734	1.73258	1.74276	1.54295		47.6667	0.000169545	0.00120321	-0.000797308	0.00209448	0.000645153
48	1.0088	1.51959	1.73131	1.74656	1.54295		48	-0.000242935	0.00150407	-0.0010706	0.000791501	0.000563202

## Sheet: Radius-slope 20s
t (h)	radius [mm]																								t (h)	Slope
2.66667																									2.66667
3																									3
3.33333	0.615448	0.596623	0.668753									0.589083	0.634252	0.620156	0.679672	0.765331	0.679672	0.635992	0.678044						3.33333
3.66667	0.677229	0.711728	0.759797	0.654963								0.737384	0.889545	0.848858	0.821063	0.942626	0.810223	0.789498	0.810223	0.722242	0.603905	0.678044			3.66667
4	0.762795	0.777608	0.821833	0.733827	0.630104		0.637305	0.637305				0.825091	1.01707	0.99176	0.926067	1.08336	0.937925	0.914055	0.94847	0.86434	0.775373	0.920081			4
4.33333	0.819051	0.849143	0.891101	0.809242	0.697152		0.752252	0.733827				0.917675	1.13029	1.13906	1.01598	1.19215	1.01489	0.99953	1.0268	0.954278	0.848858	0.980553			4.33333	0.179952	0.177543	0.19211	0.184769	0.16396	0.155279	0.208	0.201247	0.159469	0.222786		0.239862	0.350683	0.382637	0.24768	0.330978	0.23341	0.255089	0.242257	0.252133	0.254239	0.235735	0.153229
4.66667	0.883386	0.908849	0.9625	0.874299	0.770237	0.61173	0.83012	0.812057	0.588924			0.983928	1.22417	1.24387	1.09048	1.30374	1.08744	1.08744	1.10658	1.04916	0.9589	1.0854			4.66667	0.179952	0.177543	0.19211	0.184769	0.16396	0.155279	0.200233	0.196421	0.157255	0.214561		0.235533	0.343893	0.373266	0.237884	0.322055	0.222809	0.244173	0.232331	0.240654	0.241173	0.221039	0.151971
5	0.944552	0.9625	1.02562	0.934839	0.824604	0.665332	0.89748	0.887252	0.649716	0.649716		1.0762	1.35446	1.39228	1.18378	1.40492	1.15925	1.15734	1.16875	1.12833	1.02572	1.13322			5	0.177309	0.167752	0.186193	0.178048	0.155995	0.149318	0.193806	0.192998	0.15517	0.20427		0.229376	0.336792	0.363762	0.229367	0.315742	0.214943	0.235815	0.225326	0.231949	0.232433	0.212765	0.15057
5.33333	0.998569	1.01669	1.08192	0.996282	0.872993	0.722862	0.966049	0.940921	0.708515	0.729148		1.13809	1.45667	1.50371	1.25801	1.51834	1.23585	1.24387	1.25184	1.22055	1.12146	1.21693	0.620156		5.33333	0.175774	0.160107	0.182238	0.172466	0.149061	0.143633	0.189332	0.190468	0.153633	0.198182		0.225942	0.333422	0.357709	0.221382	0.309993	0.207253	0.227452	0.217498	0.22321	0.222792	0.203214	0.14785
5.66667	1.04436	1.06599	1.13945	1.04436	0.92379	0.771716	1.0234	0.999711	0.758294	0.814862		1.21874	1.55998	1.61224	1.32309	1.60399	1.28924	1.30119	1.30374	1.27546	1.16969	1.24653	0.673137		5.66667	0.173296	0.15353	0.177779	0.166792	0.143027	0.139784	0.184749	0.189116	0.151924	0.191726		0.219095	0.324952	0.346732	0.212623	0.301849	0.198983	0.218934	0.209723	0.214088	0.213831	0.196624	0.139767
6	1.10385	1.10797	1.19229	1.0997	0.975451	0.821833	1.08298	1.06277	0.810651	0.882094		1.27025	1.65887	1.7081	1.38512	1.69772	1.34873	1.3739	1.3731	1.35119	1.25449	1.32559	0.726818		6	0.167692	0.138554	0.168367	0.161783	0.137871	0.136073	0.180427	0.187512	0.150464	0.187059	0.0788317	0.206761	0.30543	0.324383	0.193958	0.28411	0.17933	0.198055	0.190301	0.206087	0.204837	0.188779	0.137902
6.33333	1.16028	1.1514	1.2593	1.15634	1.01444	0.870375	1.14045	1.11924	0.854501	0.944552		1.33804	1.75407	1.80744	1.44295	1.79147	1.41042	1.43604	1.44142	1.41433	1.31471	1.38671	0.772518		6.33333	0.161661	0.128322	0.160284	0.151437	0.132679	0.131956	0.176908	0.186022	0.148433	0.182265	0.121252	0.196917	0.295263	0.307597	0.179574	0.270615	0.163403	0.182919	0.175207	0.188414	0.184587	0.166364	0.134807
6.66667							1.18941	1.17688	0.907593	1.00767		1.41745	1.86106	1.91953	1.49487	1.87172	1.44754	1.4815	1.48224	1.45895	1.35201	1.4112	0.82375		6.66667	0.157647	0.118513	0.151795	0.142866	0.122886	0.127735	0.166299	0.180544	0.145735	0.178199	0.121686	0.187884	0.287544	0.29344	0.166594	0.260522	0.15283	0.171775	0.165478	0.176804	0.172027	0.158892	0.133733
7	1.27282	1.23275	1.35614	1.25385	1.10178	0.958937	1.24105	1.23645	0.955361	1.05631		1.46424	1.9481	2.00844	1.54932	1.96898	1.50665	1.54504	1.54861	1.52125	1.42057	1.48299	0.871978		7	0.152448	0.108996	0.143113	0.135698	0.114275	0.124146	0.159778	0.176843	0.143324	0.173586	0.122659	0.180162	0.279545	0.281202	0.153948	0.247216	0.140847	0.157933	0.153175	0.163467	0.155038	0.145817	0.129854
7.33333	1.32981	1.26382	1.40896	1.29415	1.1304	0.991691	1.29855	1.29591	1.00427	1.1172		1.5436	2.06968	2.12657	1.59709	2.05467	1.54861	1.59015	1.58737	1.56635	1.45819	1.5125	0.915263		7.33333	0.147535	0.100192	0.134953	0.128662	0.106558	0.116525	0.153921	0.174849	0.13748	0.169844	0.117513	0.16923	0.267747	0.265988	0.14039	0.235929	0.130741	0.147425	0.142686	0.153071	0.143649	0.14083	0.127065
7.66667	1.3712	1.29239	1.44572	1.32637	1.1593	1.03117	1.34431	1.36034	1.04981	1.16519	0.594707	1.56423	2.10673	2.16213	1.62725	2.10515	1.5776	1.62793	1.62657	1.60193	1.50077	1.57198	0.936746		7.66667	0.142724	0.0915688	0.126763	0.121713	0.0993571	0.108914	0.148205	0.173401	0.131906	0.161069	0.110022	0.163198	0.257948	0.255092	0.129574	0.222389	0.119514	0.134353	0.128993	0.141778	0.128661	0.129197	0.124165
8	1.41138	1.31514	1.4785	1.36286	1.18941	1.06492	1.39021	1.41542	1.09659	1.22066	0.620985	1.65085	2.21963	2.26742	1.67412	2.18754	1.61018	1.66618	1.66086	1.64683	1.53283	1.59432	0.992873		8	0.135793	0.0830467	0.118425	0.114927	0.0922339	0.101039	0.143014	0.170355	0.126702	0.153607	0.107098	0.153624	0.246979	0.243254	0.120217	0.213511	0.112252	0.125889	0.120282	0.135457	0.120314	0.126925	0.119009
8.33333	1.45516	1.34261	1.5098	1.39103	1.21128	1.09242	1.44098	1.47231	1.13644	1.26653	0.675542	1.67214	2.27811	2.32184	1.71391	2.25127	1.64616	1.71456	1.71004	1.69511	1.5804	1.65553	1.02572		8.33333	0.12843	0.0757593	0.111363	0.108373	0.0864897	0.0935402	0.137253	0.166947	0.120532	0.147638	0.103408	0.144672	0.235866	0.232337	0.111099	0.202965	0.1048	0.116844	0.110787	0.128144	0.110691	0.12188	0.114546
8.66667	1.49843	1.3662	1.54639	1.43145	1.24105	1.11822	1.48466	1.53156	1.17105	1.31601	0.711728	1.7242	2.37316	2.41425	1.74649	2.32992	1.68989	1.75973	1.75154	1.75154	1.62249	1.70097	1.07517		8.66667	0.123287	0.070228	0.105979	0.105291	0.0834961	0.0879702	0.130692	0.163295	0.114625	0.142549	0.0999316	0.132104	0.221486	0.217922	0.101296	0.19021	0.0960739	0.107722	0.101084	0.119668	0.101836	0.116599	0.107954
9	1.5323	1.37701	1.5749	1.46765	1.27103	1.14941	1.53007	1.57852	1.21128	1.35362	0.753767	1.771	2.44789	2.48552	1.77287	2.35867	1.70032	1.75973	1.7547	1.76412	1.61635	1.68596	1.09149		9	0.116576	0.0649995	0.100484	0.101991	0.0796852	0.0836438	0.124452	0.158228	0.107463	0.138168	0.0952289	0.1202	0.206718	0.204332	0.0926412	0.178786	0.0885516	0.0991921	0.0936653	0.112759	0.0938262	0.112064	0.101976
9.33333	1.57127	1.39839	1.60432	1.49614	1.28619	1.1691	1.56764	1.6381	1.23737	1.40165	0.781997	1.78838	2.49794	2.53701	1.7927	2.43294	1.74396	1.81415	1.79578	1.81354	1.6728	1.76787	1.13029		9.33333	0.115031	0.0643988	0.0982726	0.100552	0.0784241	0.0831004	0.117486	0.152819	0.100903	0.135099	0.0925788	0.117417	0.202309	0.200383	0.0897882	0.174635	0.0865897	0.0966878	0.0904151	0.11225	0.092459	0.112345	0.103333
9.66667	1.60859	1.41622	1.63182	1.52484	1.3108	1.19516	1.60503	1.6848	1.27013	1.44414	0.803583	1.86284	2.56689	2.61509	1.82508	2.46364	1.74902	1.81537	1.7927	1.82932	1.66352	1.74015	1.15925		9.66667	0.11015	0.0620336	0.0928995	0.0972667	0.0756598	0.0802792	0.111498	0.147777	0.0958388	0.1332	0.0911285	0.117639	0.20179	0.200495	0.0915502	0.17704	0.0887591	0.100816	0.092241	0.115053	0.0991322	0.119302	0.107363
10	1.62622	1.42826	1.6623	1.54934	1.33409	1.21033	1.64089	1.72693	1.30206	1.49003	0.841043	1.87113	2.62184	2.66366	1.85511	2.55004	1.79763	1.87054	1.85094	1.88877	1.72868	1.84616	1.19586		10	0.105385	0.0598308	0.0871057	0.0929857	0.0715959	0.0772171	0.107446	0.143912	0.0926288	0.134132	0.090885	0.118908	0.202463	0.202269	0.0938163	0.179619	0.0897365	0.105624	0.0922049	0.114561	0.105023	0.124876	0.10894
10.3333	1.67052	1.45359	1.70499	1.58645	1.3662	1.23829	1.67188	1.77579	1.32465	1.52559	0.865116	1.89811	2.68021	2.72762	1.87467	2.59046	1.82023	1.89402	1.87408	1.91665	1.75154	1.87644	1.23137		10.3333	0.100036	0.0577772	0.0804735	0.0871898	0.0663719	0.0743904	0.104059	0.140374	0.0902044	0.135703	0.0891016	0.111044	0.191549	0.192265	0.0897305	0.17145	0.0849623	0.0998912	0.086968	0.106477	0.102736	0.124329	0.103861
10.6667	1.72825	1.49003	1.75576	1.64852	1.40815	1.27908	1.69358	1.81958	1.35446	1.56764	0.88982	1.90101	2.70033	2.7478	1.87997	2.60832	1.81841	1.90043	1.87938	1.91434	1.75218	1.87938	1.23047		10.6667	0.0942485	0.0552526	0.0736998	0.0807779	0.0609942	0.0718346	0.100637	0.136962	0.0894298	0.137202	0.0859229	0.105289	0.18025	0.179613	0.0852212	0.161177	0.0799138	0.0911581	0.0798293	0.0969798	0.0961704	0.117508	0.0984185
11	1.74925	1.50753	1.76806	1.66778	1.42506	1.31167	1.72495	1.85436	1.37286	1.60929	0.902551	1.92757	2.74619	2.80276	1.90276	2.65577	1.83354	1.91665	1.90508	1.9464	1.76912	1.90276	1.26239		11	0.0882619	0.0531416	0.0661119	0.0728124	0.0543254	0.0687138	0.0983442	0.132896	0.0889574	0.136724	0.0836243	0.102943	0.168644	0.166239	0.0839477	0.151509	0.0742175	0.0796506	0.0718492	0.0880103	0.0851128	0.103176	0.0950332
11.3333	1.779	1.52035	1.78156	1.68276	1.43543	1.32809	1.7499	1.89694	1.39839	1.65404	0.934839	2.03305	2.89623	2.93903	1.98129	2.78098	1.92068	2.00844	1.97794	2.05145	1.87349	2.01009	1.36421		11.3333	0.0820787	0.0512517	0.0587203	0.0651428	0.0480153	0.0647766	0.0960331	0.128616	0.0878034	0.135413	0.0800828	0.0949543	0.155123	0.150277	0.0809105	0.142904	0.0708506	0.073063	0.0689607	0.0823358	0.0804856	0.0970379	0.091344
11.6667	1.79814	1.53528	1.79242	1.69694	1.44572	1.34346	1.78796	1.94329	1.43622	1.711	0.967229	2.10882	3.00043	3.04068	2.04713	2.88514	1.97346	2.09357	2.03685	2.10935	1.96842	2.09726	1.4229		11.6667	0.0753893	0.0484006	0.0504591	0.0577037	0.0414974	0.06098	0.0937188	0.123131	0.0859886	0.131424	0.0762825	0.0867491	0.140571	0.132843	0.0760166	0.129523	0.0648319	0.0615551	0.0626886	0.073981	0.0704385	0.0837531	0.0845158
12	1.81456	1.54786	1.79369	1.707	1.45045	1.36202	1.82834	1.99714	1.47541	1.7745	1.0054	2.12865	3.03595	3.08255	2.07448	2.92923	1.98296	2.13383	2.04551	2.10935	2.00016	2.14159	1.4291		12	0.0685927	0.0456184	0.0421068	0.0502603	0.0340555	0.0558955	0.0907658	0.117924	0.0828224	0.126136	0.0710713	0.0760924	0.124323	0.113533	0.0699004	0.117355	0.0600894	0.051868	0.057251	0.0664882	0.0626354	0.0735573	0.077183
12.3333	1.83457	1.56034	1.80067	1.71566	1.45281	1.37618	1.86479	2.03449	1.5045	1.82771	1.03889	2.08829	3.00669	3.0512	2.03902	2.88015	1.94924	2.05091	2.01009	2.06326	1.939	2.09832	1.40571		12.3333	0.0620106	0.04238	0.0338022	0.0429568	0.0265925	0.0504847	0.0874771	0.111959	0.0796128	0.119372	0.0643154	0.0717342	0.110128	0.0984318	0.0659894	0.105013	0.0553725	0.0425911	0.0513494	0.0600112	0.051809	0.0584018	0.0709961
12.6667	1.85436	1.56982	1.81581	1.72627	1.46142	1.39349	1.89152	2.07613	1.53973	1.86479	1.06062	2.09357	3.01036	3.03558	2.04335	2.87977	1.96561	2.03685	2.00733	2.06594	1.91953	2.08033	1.40885		12.6667	0.0540926	0.0380017	0.0260916	0.0351912	0.0195688	0.0436576	0.0839619	0.105203	0.0758539	0.111717	0.0579022	0.0626175	0.093649	0.0799353	0.0595874	0.0932924	0.050158	0.0325589	0.0454926	0.053552	0.042498	0.0470503	0.0620953
13	1.86968	1.58213	1.82209	1.73155	1.46298	1.40571	1.92322	2.10451	1.56545	1.8879	1.07558	2.1769	3.06096	3.08255	2.09199	2.91979	1.97122	2.00568	1.99408	2.08086	1.87172	1.99685	1.45895		13	0.0463891	0.0336523	0.0203231	0.0289225	0.0137246	0.0373763	0.0798391	0.0979699	0.0708877	0.102556	0.0509306	0.0532595	0.0773899	0.062934	0.0519404	0.080397	0.0446256	0.0235316	0.0393232	0.0472485	0.0327375	0.0364759	0.0534565
13.3333	1.88124	1.59434	1.83021	1.74075	1.47154	1.41461	1.9468	2.1309	1.58357	1.91668	1.08087	2.12865	3.04939	3.06277	2.09199	2.94429	1.99795	2.05575	2.04929	2.11354	1.94299	2.09252	1.46499		13.3333	0.0411494	0.0309748	0.0182653	0.0266583	0.0106093	0.0323418	0.0743955	0.0900376	0.0656324	0.0926474	0.0434451	0.0410436	0.0582296	0.0434773	0.0420553	0.0644636	0.0362456	0.0128569	0.0316349	0.037808	0.0203018	0.0234013	0.0414049
13.6667	1.89513	1.60575	1.83083	1.74925	1.46998	1.42586	1.96547	2.15486	1.59291	1.93446	1.08613	2.13435	3.05518	3.06313	2.09304	2.94991	2.00237	2.04389	2.05198	2.12345	1.93615	2.0867	1.46951		13.6667	0.0357898	0.0277956	0.0162785	0.0251874	0.00843266	0.0284156	0.0686255	0.081193	0.0589571	0.0819836	0.0348242	0.0328678	0.0409245	0.0267717	0.0334789	0.048245	0.0257992	-0.00333707	0.0192313	0.0262141	0.00195129	0.0021934	0.0302124
14	1.90474	1.61707	1.83519	1.75965	1.47231	1.43065	1.98165	2.17803	1.60575	1.95324	1.08823	2.14159	3.07106	3.0707	2.10515	2.96933	2.01338	2.04605	2.06005	2.13176	1.9464	2.08987	1.47702		14	0.0312883	0.0245847	0.0144685	0.0237389	0.00661773	0.0241383	0.0620695	0.0722919	0.0518616	0.0714727	0.0266607	0.0274732	0.0326906	0.018748	0.0286566	0.0415609	0.0233855	-0.00501866	0.018225	0.0250303	-0.001309	-0.00104901	0.0259506
14.3333	1.91549	1.62482	1.83954	1.76871	1.47231	1.43702	1.99828	2.19837	1.62411	1.97184	1.09242	2.18349	3.10363	3.11181	2.14159	3.0144	2.04929	2.08511	2.09884	2.17436	1.96392	2.11354	1.51031		14.3333	0.0266372	0.0216651	0.0128125	0.0223972	0.00529385	0.0199132	0.0559823	0.0640111	0.0454022	0.0626882	0.0193904	0.0284463	0.0325898	0.0181211	0.0285876	0.0424662	0.0249514	0.00113406	0.0222829	0.0284973	0.00355616	0.00308238	0.0264751
14.6667	1.92678	1.62972	1.84325	1.77257	1.47541	1.44019	2.01477	2.21954	1.63531	1.9897	1.09763	2.16774	3.09614	3.09257	2.12657	3.00669	2.03359	2.05414	2.07927	2.15906	1.95263	2.09304	1.49042		14.6667	0.021618	0.0187072	0.0109809	0.020799	0.00404608	0.0157646	0.0508526	0.0572914	0.0400039	0.0567124	0.0147145	0.0279451	0.0321807	0.019009	0.0280027	0.0438063	0.0237772	0.00729974	0.0235588	0.0280253	0.00878478	0.00795679	0.0228934
15	1.92441	1.63182	1.84449	1.78156	1.47386	1.44966	2.02944	2.23338	1.64644	2.00796	1.10281	2.17944	3.10434	3.10221	2.13124	3.01659	2.0401	2.06701	2.08405	2.17029	1.95546	2.10515	1.49782		15	0.0170355	0.0158484	0.00948065	0.0190856	0.00290109	0.0122972	0.0466443	0.0511394	0.0353434	0.052974	0.0118626	0.0271151	0.0310475	0.0197488	0.0260266	0.0419699	0.0224417	0.0105853	0.0251382	0.0257945	0.0124005	0.0141441	0.0212503
15.3333	1.92559	1.63671	1.85067	1.78668	1.47386	1.44966	2.044	2.2451	1.65818	2.02494	1.10488	2.18602	3.11252	3.1079	2.13849	3.0261	2.04281	2.06701	2.09252	2.17538	1.9549	2.10778	1.50003		15.3333	0.0131322	0.0127594	0.00850721	0.0173043	0.00214693	0.00974272	0.0425651	0.045926	0.0317843	0.0499898	0.0104634	0.0304853	0.030876	0.020494	0.0253863	0.0384834	0.0207659	0.00981138	0.0220074	0.0223112	0.010211	0.0102434	0.0202175
15.6667	1.93033	1.63322	1.8519	1.79496	1.47541	1.45124	2.05791	2.25979	1.6671	2.03841	1.11003	2.24636	3.14467	3.13199	2.16723	3.03231	2.03576	2.00954	2.04064	2.15342	1.89752	2.02105	1.51469		15.6667	0.00977728	0.00991377	0.0075648	0.0150598	0.00155107	0.00766173	0.039226	0.0408369	0.0288239	0.0468107	0.00981705	0.0320688	0.0300134	0.0199878	0.0234062	0.0346222	0.0166953	0.00524042	0.0159027	0.0168784	0.00381286	0.00179297	0.0176801
16	1.93387	1.63741	1.85128	1.7975	1.47541	1.44966	2.07117	2.27237	1.67801	2.05458	1.11003	2.20615	3.13869	3.12669	2.16111	3.05699	2.06005	2.08723	2.1104	2.18552	1.9729	2.12501	1.51688		16	0.00679293	0.00770215	0.00723411	0.0128011	0.00153039	0.00567435	0.0360311	0.0360398	0.0261373	0.0438709	0.00923843	0.0293806	0.0272211	0.0176472	0.020999	0.0321384	0.0153516	0.00609113	0.0154297	0.0144135	0.00483821	0.00344172	0.016487
16.3333	1.93387	1.64158	1.85128	1.80004	1.47541	1.45124	2.08216	2.28389	1.6848	2.07062	1.11003	2.21963	3.15063	3.12457	2.16825	3.06782	2.06701	2.09252	2.12189	2.19359	1.97346	2.12813	1.52849		16.3333	0.00445393	0.00605055	0.00672681	0.0105719	0.00153909	0.00455402	0.0328926	0.0314977	0.0233365	0.0404491	0.00859404	0.0278777	0.0235877	0.0147239	0.0171686	0.0271692	0.00934616	-0.00144251	0.00846978	0.00717753	-0.00103215	-0.00441672	0.012547
16.6667	1.93151	1.64297	1.85682	1.80131	1.47541	1.4473	2.092	2.29237	1.69021	2.08545	1.11822	2.19661	3.12916	3.10683	2.14931	3.05011	2.03847	2.04605	2.09252	2.1606	1.94185	2.0904	1.48968		16.6667	0.00267892	0.00526083	0.0060736	0.00909647	0.00143685	0.00336627	0.0295097	0.0272764	0.0202878	0.0366766	0.00702998	0.02305	0.0198603	0.011272	0.0141614	0.0241241	0.00819814	-0.00143255	0.00762924	0.00471133	0.000603294	-0.00250663	0.0098335
17	1.93151	1.64436	1.86234	1.80447	1.47772	1.45202	2.10125	2.30131	1.69829	2.09799	1.11822	2.2498	3.16882	3.14502	2.18552	3.08828	2.08405	2.09463	2.14416	2.20114	1.98463	2.14777	1.54861		17	0.00133779	0.00537671	0.00550426	0.00760146	0.00171519	0.00255204	0.0262414	0.0233747	0.0179265	0.0328323	0.00592067	0.0187743	0.0156372	0.00779826	0.0109849	0.021878	0.00577524	-0.00253734	0.00600715	0.00104183	0.000175968	-0.00329049	0.00612919
17.3333	1.93151	1.64367	1.8605	1.8051	1.47618	1.45438	2.1083	2.30527	1.7003	2.10559	1.1223	2.31755	3.20075	3.17753	2.21864	3.10149	2.08193	2.07021	2.11301	2.20465	1.9464	2.05844	1.57409		17.3333	0.00137233	0.00488782	0.00531985	0.00615825	0.00194922	0.00200325	0.0229151	0.020118	0.0156277	0.029122	0.00430784	0.016061	0.0136892	0.00648302	0.0101983	0.0210966	0.00690778	6.03856e-05	0.00881899	0.0016615	0.00298484	0.000356205	0.00603758
17.6667	1.9321	1.64367	1.8605	1.80573	1.4785	1.45516	2.1137	2.30923	1.70231	2.1137	1.12331	2.23502	3.16359	3.13058	2.17385	3.08506	2.0654	2.06701	2.10987	2.18602	1.95659	2.09832	1.52415		17.6667	0.000752208	0.00486354	0.00516253	0.00539861	0.00214667	0.00242075	0.0196528	0.0169492	0.0135053	0.0253841	0.00313822	0.0145155	0.0121641	0.00631059	0.00982798	0.0204863	0.00890931	0.00514538	0.0116251	0.00366189	0.00679313	0.0063936	0.00649149
18	1.93269	1.64644	1.86418	1.80637	1.47772	1.45359	2.11748	2.31367	1.70566	2.11802	1.12534	2.2498	3.17022	3.13939	2.18147	3.09828	2.08086	2.08193	2.12968	2.19913	1.97402	2.12136	1.54289		18	0.000653258	0.00487508	0.00528775	0.00468496	0.00208	0.00295057	0.016937	0.0140387	0.0115696	0.0221289	0.00179476	0.011001	0.00932587	0.00504027	0.00781216	0.0188152	0.00912046	0.00751842	0.0124403	0.00456372	0.0098429	0.00975313	0.00453562
18.3333	1.9321	1.64782	1.86662	1.807	1.48081	1.45673	2.12286	2.31712	1.71234	2.12286	1.12534	2.27569	3.17231	3.14396	2.17741	3.08649	2.03413	2.00182	2.06326	2.1452	1.90624	2.0216	1.51761		18.3333	0.000151023	0.0051194	0.00554068	0.00461311	0.00258107	0.00310549	0.0143202	0.0113691	0.00981046	0.0185631	0.000899282	0.0131947	0.00964161	0.0060506	0.00846222	0.0168945	0.00864284	0.00567297	0.00872659	0.00372068	0.0063399	0.00609074	0.00465517
18.6667	1.93328	1.65128	1.8654	1.81267	1.4785	1.45516	2.12554	2.31909	1.713	2.12608	1.11822	2.25029	3.17091	3.1415	2.18602	3.10755	2.08299	2.08086	2.12709	2.1946	1.97738	2.12189	1.53066		18.6667	0.000765385	0.00471055	0.00549794	0.00442238	0.0026465	0.00364856	0.0120666	0.00919768	0.00846828	0.0156917	-0.000178332	0.0118162	0.00974279	0.00688783	0.00916945	0.0172268	0.011673	0.012536	0.0120235	0.00687586	0.011308	0.0125554	0.00575169
19	1.93033	1.65818	1.86601	1.81015	1.48389	1.45595	2.12983	2.32106	1.71633	2.13037	1.12331	2.2251	3.14291	3.1047	2.15445	3.08613	2.03739	2.02815	2.08352	2.14107	1.93786	2.06808	1.48894		19	0.00167032	0.0047445	0.00498807	0.00415417	0.00257981	0.00383307	0.0102489	0.00756539	0.00726991	0.0133714	-0.00142469	0.00684208	0.00617133	0.00235308	0.00503053	0.0140217	0.00841961	0.0103306	0.00824014	0.00390277	0.00990316	0.0111067	0.00124308
19.3333	1.93564	1.65059	1.87029	1.81267	1.48158	1.4583	2.13037	2.32302	1.71832	2.13572	1.11618	2.2679	3.18413	3.15098	2.20164	3.12315	2.09515	2.09832	2.15547	2.20364	1.98463	2.13642	1.55075		19.3333	0.00212459	0.00471962	0.00493916	0.00388595	0.00244683	0.00370926	0.00868043	0.0062618	0.00633003	0.0114378	-0.0018408	0.000246211	0.000803689	-0.00263867	-0.000201297	0.00959394	0.0037695	0.0058927	0.00304268	-0.000466542	0.00634714	0.0080314	-0.00504411
19.6667	1.9321	1.6568	1.87334	1.81644	1.48389	1.46142	2.13198	2.324	1.72031	2.13679	1.11822	2.28344	3.19314	3.16219	2.21265	3.13164	2.10725	2.11928	2.16162	2.21365	1.99795	2.15701	1.55786		19.6667	0.00194235	0.00517351	0.00512237	0.00369795	0.00299169	0.00337363	0.00751701	0.00538972	0.00560908	0.0102771	-0.0021424	-0.00156138	-0.00102194	-0.00439131	-0.00226028	0.00810645	0.00296818	0.0050259	0.00267551	-0.00144161	0.00645931	0.00951618	-0.00615234
20	1.93799	1.65542	1.87394	1.81644	1.48235	1.46454	2.13732	2.32744	1.72031	2.14265	1.11618	2.26888	3.18205	3.15204	2.19762	3.12598	2.09357	2.09568	2.14055	2.20164	1.99629	2.13072	1.53643		20	0.00256229	0.00447688	0.00498652	0.00343523	0.00285328	0.00358293	0.00645894	0.00465211	0.00485785	0.00950906	-0.0017654	0.0061776	0.00436705	0.00154403	0.00404935	0.0107624	0.00808503	0.011986	0.00622785	0.00413489	0.00964753	0.0101189	0.00118385
20.3333	1.92973	1.66504	1.87759	1.81895	1.48849	1.46064	2.13679	2.32597	1.72164	2.14159	1.1172	2.2786	3.19245	3.15764	2.20465	3.13128	2.10147	2.11719	2.15496	2.21065	1.99241	2.1524	1.54932		20.3333	0.00194493	0.00392386	0.00456926	0.00304408	0.00329575	0.00354105	0.00544374	0.00391339	0.00419836	0.00909218	-0.000999561	0.00471414	0.00397808	0.00129255	0.0034393	0.00957156	0.0082125	0.0108452	0.00538771	0.00447059	0.00929726	0.0102311	0.00115583
20.6667	1.93858	1.65749	1.87881	1.81833	1.48543	1.46843	2.13785	2.32744	1.7223	2.14691	1.11618	2.28828	3.2042	3.16568	2.21814	3.14431	2.12449	2.14571	2.17385	2.22907	2.01886	2.1708	1.56352		20.6667	0.00233677	0.00285137	0.00413016	0.00237149	0.0029807	0.00337902	0.00461675	0.00361565	0.003641	0.00867742	0.000140953	0.0027859	0.00248139	-0.00027854	0.0016236	0.00796396	0.00758108	0.00872125	0.00364283	0.00379403	0.0079278	0.0094342	-0.000269551
21	1.9427	1.66093	1.87759	1.8177	1.48543	1.46532	2.14052	2.32891	1.72296	2.14903	1.11516	2.24341	3.15764	3.11145	2.16213	3.10399	2.05306	2.04281	2.08776	2.15496	1.95094	2.08193	1.49191		21	0.00237176	0.00188811	0.00345586	0.00145042	0.00280854	0.00331103	0.0038847	0.00342258	0.00342857	0.00825552	0.00119453	0.00982759	0.00485226	0.00257526	0.0027656	0.00652506	0.0036054	-0.00230278	-0.00559881	-0.000285544	-0.00194621	-0.00557905	0.000658498
21.3333	1.94152	1.66161	1.88063	1.81895	1.48619	1.46843	2.14105	2.32989	1.72561	2.1485	1.11618	2.25471	3.16254	3.12457	2.17029	3.11571	2.06754	2.06273	2.0999	2.1708	1.95885	2.09937	1.51031		21.3333	0.00148264	0.00153334	0.00288013	0.000974192	0.00281003	0.00271353	0.00343087	0.00314303	0.00282839	0.0080322	0.00250943	0.0106501	0.00641277	0.00454295	0.00440614	0.00757212	0.00714938	0.00243101	-0.00202098	0.00349307	0.00220895	-0.0012491	0.00306221
21.6667	1.93564	1.66847	1.88063	1.81895	1.49309	1.46376	2.14265	2.33038	1.72429	2.15274	1.1172	2.25814	3.16324	3.12103	2.16876	3.11607	2.06433	2.05091	2.09779	2.16519	1.9549	2.08776	1.50591		21.6667	0.000476654	0.00169708	0.00199212	-0.000116133	0.00337331	0.00202884	0.00299685	0.00301859	0.00254333	0.00782172	0.00384201	0.00918648	0.00518391	0.00313299	0.00274338	0.00646364	0.00615006	0.00288281	-0.0025242	0.00280859	0.00328212	-0.00131522	0.00195174
22	1.94563	1.65955	1.88184	1.81958	1.48926	1.46921	2.14212	2.33184	1.72561	2.15698	1.12026	2.29262	3.20971	3.16952	2.2256	3.15344	2.1328	2.16366	2.17233	2.23205	2.03033	2.17131	1.56846		22	0.00061337	0.000271911	0.00118603	-0.00119823	0.00245861	0.00142207	0.00260805	0.00275622	0.002346	0.00776454	0.00460788	0.0112369	0.00721213	0.00562238	0.00536612	0.00818405	0.0100801	0.00786462	0.00314177	0.0065867	0.00710468	0.00331476	0.00601168
22.3333	1.93269	1.66367	1.88184	1.81958	1.49538	1.46765	2.14159	2.33135	1.72825	2.15962	1.12331	2.27666	3.18656	3.15028	2.19762	3.13551	2.10147	2.08723	2.13383	2.19661	1.99019	2.13694	1.5393		22.3333	0.000531557	-0.000948816	0.000212121	-0.00219029	0.00170125	0.00126732	0.00216702	0.00259692	0.00214065	0.00748695	0.00523568	0.00960535	0.00630891	0.00497162	0.00421206	0.00712144	0.00938098	0.00464595	0.0024814	0.00505315	0.00542252	0.00327676	0.00479216
22.6667	1.94387	1.65749	1.88063	1.8177	1.49003	1.46998	2.14372	2.33478	1.72957	2.16174	1.12534	2.26058	3.16952	3.12775	2.17842	3.12315	2.08033	2.06166	2.1041	2.17131	1.96336	2.10568	1.50371		22.6667	-0.000174805	-0.00180981	-0.000448885	-0.00304113	0.00107963	0.000363602	0.00183675	0.00247738	0.00182189	0.00759149	0.00587783	0.00713975	0.00461974	0.00371276	0.00228013	0.0060164	0.00853081	-0.000421138	0.000482335	0.00262485	0.00358022	0.000844717	0.00258101
23	1.94211	1.65887	1.87759	1.81581	1.49003	1.46998	2.14265	2.33527	1.72957	2.16279	1.12433	2.33702	3.21212	3.17231	2.21714	3.14256	2.09515	2.04713	2.08934	2.18956	1.94071	2.05252	1.55431		23	-0.00135167	-0.00130641	-0.000893307	-0.0032319	0.00101996	-0.000931119	0.00155171	0.00214452	0.00152085	0.00697875	0.0057979	0.0097449	0.00715584	0.00680759	0.004879	0.00781549	0.0126987	0.00601244	0.00643789	0.00705991	0.00812497	0.00774633	0.00687828
23.3333	1.93151	1.66367	1.88184	1.81581	1.49614	1.46765	2.14584	2.33478	1.72693	2.16753	1.13543	2.3032	3.2104	3.16917	2.21914	3.15589	2.1359	2.14674	2.16927	2.23106	2.0276	2.16723	1.56211		23.3333	-0.00226516	-0.00184065	-0.00124567	-0.00389357	0.000550789	-0.00150182	0.00125282	0.00186347	0.00107625	0.00678854	0.00557542	0.0131485	0.0107076	0.0104192	0.00840123	0.0106225	0.0187585	0.0137129	0.0135938	0.0129629	0.01408	0.0156937	0.0118919
23.6667	1.93328	1.66367	1.88002	1.81204	1.49919	1.46765	2.14425	2.33673	1.72891	2.16911	1.13242	2.31373	3.21625	3.17649	2.22212	3.16289	2.14365	2.16774	2.17842	2.24636	2.04497	2.18501	1.57409		23.6667	-0.00277604	-0.00231225	-0.00193106	-0.00451809	7.64261e-05	-0.00217951	0.00106673	0.00173076	0.000740545	0.00632194	0.0049979	0.00911434	0.00851655	0.00727442	0.00489572	0.00814006	0.0151987	0.0086583	0.0107788	0.00865322	0.0106687	0.0124941	0.00791622
24	1.94094	1.65473	1.8782	1.80952	1.48696	1.46765	2.14638	2.33527	1.72957	2.17069	1.13543	2.31898	3.21796	3.17961	2.22808	3.16498	2.15085	2.16111	2.18197	2.24242	2.03956	2.17893	1.57619		24	-0.00277177	-0.00302177	-0.00229623	-0.0046938	-0.00073109	-0.0024002	0.000778961	0.00157242	0.000757732	0.00562769	0.0039954	0.0092665	0.00691246	0.00611181	0.00221912	0.00567971	0.0106378	-0.00163571	0.00307253	0.00334861	0.00183807	0.00122474	0.00519654
24.3333	1.94329	1.65059	1.87394	1.80573	1.48696	1.47076	2.14638	2.33722	1.72891	2.17226	1.13443	2.26595	3.17857	3.13446	2.17538	3.12916	2.09146	2.05091	2.10515	2.17487	1.96842	2.10725	1.51031		24.3333	-0.00320189	-0.00304993	-0.00254112	-0.00497933	-0.0012062	-0.00296964	0.000561498	0.00135294	0.000348289	0.00491881	0.00331067	0.0070911	0.00468961	0.00399484	-0.00107488	0.00405721	0.00896427	-0.00433119	0.00152009	0.00136424	0.000361085	0.000367443	0.00266438
24.6667	1.93092	1.65542	1.87699	1.80573	1.49079	1.45986	2.14372	2.33576	1.72891	2.17541	1.13945	2.27034	3.17996	3.13481	2.17792	3.13481	2.10305	2.04605	2.10515	2.17233	1.96392	2.102	1.51615		24.6667	-0.0030301	-0.00371943	-0.0022847	-0.00444817	-0.00187249	-0.00294901	0.000277327	0.00100818	1.73823e-05	0.00403259	0.00274754	0.0102155	0.00737915	0.00675255	0.00153749	0.00500821	0.0108404	-0.00255291	0.00259295	0.00287157	-0.000377543	-0.00297432	0.0065749
25	1.93387	1.66024	1.87577	1.80889	1.49156	1.45908	2.14584	2.33624	1.72891	2.17332	1.13342	2.31851	3.21693	3.17649	2.21963	3.16394	2.15394	2.14777	2.17589	2.23749	2.03793	2.18147	1.57409		25	-0.00391716	-0.00390922	-0.00219322	-0.00431503	-0.00167572	-0.00302581	-8.05864e-05	0.00059887	-0.000200227	0.00340327	0.00129687	0.00537052	0.00495692	0.00446718	-0.00110066	0.00327322	0.00856015	-0.00730807	0.00151023	-4.51973e-05	-0.00247488	-0.00327744	0.0039676
25.3333	1.92737	1.65611	1.87516	1.80257	1.49079	1.4583	2.14584	2.33673	1.72759	2.17699	1.13543	2.32279	3.21899	3.17614	2.21714	3.16568	2.15752	2.13435	2.17131	2.23749	2.03087	2.1769	1.56987		25.3333	-0.00343656	-0.00432778	-0.00213767	-0.00429464	-0.00216046	-0.00275904	-0.000347197	0.000499047	-0.00032653	0.00257409	0.000339801	0.000991518	0.0016559	0.00110112	-0.00407463	0.000953548	0.00561663	-0.0107226	-0.000160003	-0.00346308	-0.00427677	-0.00426209	-0.000752118
25.6667	1.92559	1.65266	1.87212	1.80131	1.49156	1.45908	2.14531	2.3382	1.72891	2.17594	1.13543	2.2931	3.20799	3.16149	2.19963	3.15379	2.1328	2.10253	2.15394	2.20515	2.00182	2.15034	1.54861		25.6667	-0.0029985	-0.00492262	-0.00220176	-0.00421522	-0.00276211	-0.00268403	-0.000842037	0.0003735	-0.000522639	0.00181067	-0.000797585	0.00635236	0.00240788	0.00250488	-0.00350544	-0.000475385	0.000935581	-0.0227739	-0.0100008	-0.00805359	-0.015152	-0.0206334	-0.000844032
26	1.93033	1.64782	1.87151	1.80257	1.48773	1.45986	2.14425	2.3382	1.73089	2.17803	1.13242	2.33655	3.21693	3.17718	2.20565	3.14818	2.11667	2.0276	2.09304	2.18299	1.93729	2.04659	1.55075		26	-0.00343426	-0.00490591	-0.00171316	-0.00428904	-0.00244994	-0.00237551	-0.000954401	0.000138454	-0.000748953	0.00115617	-0.000498622	0.00709481	0.00312558	0.00360518	-0.00182717	0.00086586	0.00395795	-0.0156944	-0.00514637	-0.00431741	-0.00960891	-0.0139782	0.00117975
26.3333	1.93033	1.64575	1.87151	1.79877	1.48389	1.45986	2.14372	2.3382	1.72825	2.17751	1.13744	2.31803	3.21728	3.17822	2.20565	3.16254	2.16162	2.12449	2.16621	2.23007	2.02433	2.17335	1.56423		26.3333	-0.00370286	-0.00419429	-0.00138079	-0.00438554	-0.00174077	-0.00194358	-0.00130547	0.000202851	-0.000892661	0.000612659	-0.000942637	0.00420155	0.00217304	0.00253638	-0.00321606	0.000778975	0.00374681	-0.0133655	-0.00403561	-0.00374217	-0.00744618	-0.0118183	0.0010569
26.6667	1.925	1.64505	1.87455	1.80447	1.48466	1.45986	2.14372	2.33624	1.72825	2.17436	1.13844	2.34929	3.22928	3.18795	2.21465	3.15659	2.139	2.0579	2.12136	2.20364	1.95659	2.06112	1.57619		26.6667	-0.00277678	-0.00426335	-0.00136979	-0.00464928	-0.00229291	-0.00138825	-0.00152711	-1.60707e-05	-0.00081427	0.00014896	-0.000988438	0.00468057	0.00277499	0.00360044	-0.0012486	0.00203075	0.0055395	-0.00600859	0.00127376	-0.000800467	-0.00209462	-0.00621004	0.00354816
27	1.92441	1.64367	1.87151	1.7975	1.48696	1.45908	2.14372	2.33673	1.72693	2.17699	1.12737	2.28344	3.19937	3.15414	2.184	3.14642	2.12761	2.0536	2.1328	2.18855	1.9757	2.11928	1.53499		27	-0.001889	-0.00490847	-0.00164325	-0.00493161	-0.00268772	-0.000469396	-0.00173489	7.08524e-05	-0.000539974	-0.000349185	-0.000921299	0.00293394	0.0010144	0.00198252	-0.00211287	0.00103129	0.00486254	-0.00450642	0.00128009	-0.000983108	-0.000672907	-0.00314992	0.00224898
27.3333	1.92618	1.64505	1.8709	1.79496	1.48389	1.45908	2.14265	2.33722	1.72627	2.17489	1.13141	2.30847	3.21074	3.16812	2.20013	3.15554	2.14828	2.09357	2.16008	2.21065	2.00789	2.14468	1.55075		27.3333	-0.00173295	-0.00476401	-0.00132619	-0.00529973	-0.00249048	-0.000252799	-0.00204053	-3.53758e-05	-0.000614011	-0.000414801	-0.000789906	-0.0011836	-0.00225033	-0.00146028	-0.00507369	-0.000984181	0.00153185	-0.00834239	-0.00113828	-0.00502431	-0.00362261	-0.00594705	-0.00188487
27.6667	1.925	1.6395	1.87151	1.79432	1.48158	1.45516	2.14105	2.33673	1.72495	2.17646	1.13141	2.34127	3.21522	3.17857	2.20013	3.14853	2.12136	2.01448	2.0904	2.18197	1.93501	2.0325	1.55359		27.6667	-0.00114044	-0.00396527	-0.00135511	-0.00533667	-0.00197437	-0.000180518	-0.00214994	-0.000238179	-0.000701178	-0.00059117	-0.0014686	0.00168177	-0.00125075	-9.15091e-05	-0.00361384	-0.000915119	0.000941186	-0.00797998	-0.00315983	-0.00438254	-0.00447009	-0.00890952	-0.000702772
28	1.92441	1.6381	1.87212	1.78923	1.48389	1.4583	2.14159	2.33624	1.72693	2.17436	1.13644	2.32707	3.21728	3.17961	2.20815	3.16638	2.16825	2.11771	2.16978	2.23007	2.02542	2.1657	1.56917		28	-0.00116772	-0.00350371	-0.000957277	-0.00545652	-0.00169669	-0.000252633	-0.00218568	-0.000470001	-0.000640057	-0.000618861	-0.00175493	-0.000560568	-0.00181628	-0.00112812	-0.0043152	-0.00097302	0.00156961	-0.00401295	-0.000935621	-0.00238827	-0.000609372	-0.00435126	-0.00100708
28.3333	1.92322	1.64228	1.8709	1.78923	1.48312	1.4583	2.13999	2.33771	1.72561	2.17489	1.13141	2.27617	3.1921	3.14748	2.16723	3.14326	2.12657	2.03359	2.11563	2.17538	1.96561	2.09252	1.53138		28.3333	-0.00136686	-0.00297086	-0.00101355	-0.00587262	-0.00114568	-0.000247392	-0.00214752	-0.000489361	-0.000618271	-0.000483953	-0.00253121	-0.0045685	-0.00379521	-0.00378336	-0.00618807	-0.00171198	-0.000926237	-0.00315978	-0.00064337	-0.00350399	-1.77201e-06	-0.00220976	-0.00366247
28.6667	1.92678	1.64019	1.86785	1.78668	1.48004	1.4583	2.13839	2.33624	1.72693	2.17489	1.13242	2.30368	3.20454	3.16428	2.19107	3.15344	2.139	2.07927	2.15085	2.19661	1.99685	2.12553	1.55288		28.6667	-0.00116046	-0.00268785	-0.00113418	-0.00567895	-0.0011723	0.000180317	-0.0022325	-0.000553859	-0.000300596	-0.000148634	-0.00304362	-0.00455912	-0.004201	-0.0039788	-0.00725996	-0.0029969	-0.00381341	-0.00883639	-0.00504075	-0.00658622	-0.00503217	-0.0089771	-0.00560302
29	1.92144	1.63601	1.86785	1.78732	1.48081	1.45751	2.13732	2.33771	1.72957	2.17332	1.13443	2.33655	3.22037	3.18274	2.21315	3.16673	2.1769	2.12553	2.17284	2.23106	2.02651	2.17029	1.58109		29	0.000632509	-0.00298466	-0.0014161	-0.00659844	-0.00191081	0.000911086	-0.00228934	-0.000608737	-0.00040972	0.000155603	-0.00416548	-0.00399243	-0.00351503	-0.0027749	-0.00627963	-0.00203492	-0.00116293	-0.00147641	-0.000965876	-0.0031629	-0.000220428	-0.00172849	-0.00400056
29.3333	1.92381	1.63741	1.87029	1.78348	1.48235	1.45986	2.13785	2.33722	1.72561	2.17489	1.12939	2.31469	3.20764	3.16847	2.19157	3.15414	2.14571	2.08033	2.15496	2.19762	1.98964	2.11771	1.55217		29.3333	0.000625478	-0.00241102	-0.000845158	-0.00586956	-0.0016921	0.00102484	-0.00231124	-0.000840669	-0.000457826	0.000342162	-0.0041103	0.00377485	0.000499958	0.00166382	-0.0017108	-0.00106279	-0.000678462	-0.00401217	-0.00503995	-0.00197783	-0.00536307	-0.0112916	0.000781977
29.6667	1.92441	1.63671	1.86662	1.78028	1.48389	1.45908	2.13679	2.33576	1.72495	2.17594	1.12534	2.3474	3.21899	3.1817	2.19711	3.14783	2.12553	2.01722	2.08564	2.18096	1.93272	2.02651	1.55288		29.6667	0.000762898	-0.00205306	-0.000422726	-0.00582096	-0.00112881	0.00126207	-0.00228415	-0.00111142	-0.000348774	0.000463212	-0.00522135	0.00102757	-0.000424435	0.000421976	-0.00212046	-0.00139671	-0.00126356	-0.00309496	-0.00373733	-0.0020874	-0.00502161	-0.00880015	3.0494e-05
30	1.92322	1.63392	1.8709	1.7822	1.48081	1.4583	2.13625	2.33478	1.72759	2.17384	1.12635	2.28731	3.19867	3.15484	2.17131	3.14185	2.13124	2.05467	2.12657	2.18804	1.97962	2.09568	1.53715		30	0.00123991	-0.00144775	-0.000173138	-0.0054953	-0.00112886	0.00132428	-0.00211582	-0.00131137	-0.000239722	0.000487461	-0.0060968	-0.00231014	-0.00171535	-0.00138303	-0.00305191	-0.00184959	-0.00222477	-0.00221935	-0.0026762	-0.00232786	-0.00352094	-0.0057561	-0.00181981
30.3333	1.92263	1.63531	1.86846	1.77707	1.48158	1.4583	2.13625	2.33527	1.72561	2.17646	1.11924	2.29551	3.19176	3.14958	2.1708	3.14396	2.11928	2.04281	2.11719	2.18147	1.9673	2.08564	1.52922		30.3333	0.00291553	-0.00144318	0.000554364	-0.00498402	-0.00207256	0.00184604	-0.00193302	-0.00144033	-0.000610313	0.000556668	-0.00703017	-0.000900998	-0.00188462	-0.00118935	-0.00340862	-0.0026393	-0.00455093	-0.00748684	-0.00723593	-0.00424903	-0.00818901	-0.0125362	-0.00272025
30.6667	1.92144	1.63531	1.86785	1.779	1.47772	1.4622	2.13465	2.33429	1.72627	2.17646	1.12331	2.29262	3.19729	3.15834	2.16876	3.14256	2.13124	2.04389	2.12709	2.18045	1.97066	2.09146	1.53211		30.6667	0.0034038	-0.00149358	0.00112946	-0.00445207	-0.00195037	0.00173843	-0.00173653	-0.00176292	-0.000758595	0.000522113	-0.00800541	0.000190904	-0.00126494	-0.0004712	-0.00168485	-0.00163811	-0.00251008	-0.00207024	-0.00414381	-0.00122745	-0.00405674	-0.00606855	-0.00156559
31	1.93858	1.62902	1.8654	1.76677	1.47231	1.4661	2.13411	2.3338	1.72363	2.17646	1.109	2.31373	3.20661	3.17057	2.18703	3.15134	2.14623	2.0867	2.14674	2.20164	1.99019	2.11563	1.55502		31	0.00377816	-0.000947126	0.00176848	-0.00344205	-0.00167016	0.00177979	-0.00147971	-0.00176643	-0.000928527	0.000466846	-0.00821313	-0.000936759	-0.00083404	-0.000400651	0.000664141	-0.000796215	0.000650814	0.00310178	-0.00189229	0.000928132	-0.000353795	-0.000757853	0.000332544
31.3333	1.925	1.63741	1.8709	1.7745	1.48081	1.45986	2.13305	2.33331	1.72363	2.17856	1.1172	2.36102	3.22996	3.19591	2.21565	3.15659	2.14468	2.04227	2.10042	2.20164	1.94697	2.0401	1.57689		31.3333	0.00431715	-0.000326557	0.00218971	-0.00285469	-0.00149116	0.00153832	-0.00133545	-0.00194404	-0.00128237	0.000577428	-0.00847764	0.00233823	0.000678071	0.00138582	0.00399308	-0.00046838	0.000233373	0.00200817	-0.00341344	0.000817991	-0.00313366	-0.00398614	0.00299385
31.6667	1.92737	1.63531	1.87212	1.77	1.48158	1.4622	2.13198	2.33184	1.72627	2.17541	1.11311	2.31612	3.20696	3.16987	2.19309	3.15309	2.14623	2.08511	2.14674	2.20364	1.98742	2.1104	1.55998		31.6667	0.00454114	-7.33671e-05	0.00268252	-0.00180625	-0.00129191	0.00150188	-0.00144867	-0.00196404	-0.00116533	0.000760034	-0.00807056	0.00324449	0.00119528	0.00187842	0.00581378	0.000694608	0.00326053	0.0064823	0.00107472	0.00386216	0.001449	0.00338835	0.0053949
32	1.92973	1.63531	1.8709	1.77193	1.47772	1.46064	2.13305	2.33135	1.72693	2.17646	1.109	2.28538	3.19072	3.14958	2.16978	3.1422	2.12084	2.04335	2.11458	2.17893	1.96561	2.08617	1.53283		32	0.00473506	0.000368245	0.00314421	-0.00115029	-0.000843703	0.00138403	-0.00136449	-0.00190334	-0.00138365	0.000860139	-0.00784143	0.00146644	0.000781251	0.00157878	0.00620055	0.000928994	0.00415603	0.00878261	0.00483874	0.00392701	0.00330599	0.00710254	0.00563119
32.3333	1.94563	1.63322	1.87577	1.77129	1.46843	1.47076	2.13358	2.33184	1.72296	2.17541	1.10488	2.29936	3.19556	3.15799	2.17182	3.14431	2.13176	2.05521	2.12241	2.18754	1.97122	2.09199	1.53787		32.3333	0.00555803	0.000202391	0.00296701	-0.000904759	-0.000533672	0.00220182	-0.00128719	-0.00178096	-0.00176814	0.00118117	-0.00782105	0.00711809	0.00267353	0.00386239	0.00787754	-0.000189916	0.000281288	-0.000156765	-0.00460106	0.00139017	-0.00671209	-0.00572335	0.00583942
32.6667	1.93564	1.63322	1.87394	1.77386	1.47618	1.4622	2.13198	2.3294	1.72296	2.17646	1.0945	2.3056	3.19937	3.15974	2.18248	3.14396	2.1302	2.06701	2.12501	2.19057	1.97514	2.102	1.54145		32.6667	0.00511035	0.000372742	0.00327602	0.000530213	0.000244807	0.00198592	-0.00117809	-0.00170692	-0.0017469	0.0016217	-0.0079721	0.00460589	0.00203843	0.00313861	0.00773811	-0.000471428	0.00100956	0.00121406	-0.00230389	0.0023425	-0.00431481	-0.00267889	0.00580664
33	1.93741	1.63462	1.87638	1.77707	1.47772	1.46454	2.13305	2.33038	1.72363	2.17594	1.10281	2.33513	3.22345	3.18621	2.23304	3.16533	2.18552	2.15342	2.1708	2.23749	2.03141	2.16315	1.58946		33	0.00456399	0.00093346	0.00327531	0.0011917	0.00100305	0.00237743	-0.00108324	-0.0016267	-0.00180821	0.00229011	-0.0077144	0.00552162	0.00182305	0.00267927	0.00785746	-0.00119725	-0.00218059	-0.00479273	-0.00628444	0.000272047	-0.00896892	-0.00841584	0.00479928
33.3333	1.93741	1.63671	1.8782	1.77322	1.47927	1.4622	2.13251	2.32891	1.71965	2.17803	1.09659	2.36382	3.22654	3.1928	2.22709	3.15098	2.13849	2.04605	2.09463	2.19611	1.92986	2.03631	1.58249		33.3333	0.00377091	0.0012418	0.00310568	0.00208162	0.00130387	0.00238838	-0.00105521	-0.00153342	-0.00154623	0.00262798	-0.00665906	0.00150653	-0.000234004	0.000300023	0.00395492	-0.00206216	-0.0028363	-0.00712048	-0.00473947	-0.000978461	-0.0068808	-0.00644461	0.00192911
33.6667	1.94152	1.63671	1.88063	1.77579	1.4785	1.4661	2.12983	2.32793	1.72098	2.18118	1.09659	2.30752	3.20006	3.16079	2.18956	3.14502	2.13487	2.05252	2.13072	2.19309	1.97122	2.09463	1.55146		33.6667	0.00555622	0.00046367	0.00246569	0.00154225	0.000422931	0.00400559	-0.00100947	-0.00151777	-0.00181741	0.00297587	-0.00693005	0.0038299	0.000990633	0.00173671	0.00523684	-0.00180627	-0.0024912	-0.00723736	-0.00447414	-0.000675237	-0.00782019	-0.00791903	0.00350788
34	1.94152	1.63741	1.87942	1.77386	1.47927	1.46376	2.13037	2.32793	1.72031	2.17961	1.0945	2.29696	3.20075	3.16463	2.19409	3.14537	2.13952	2.06808	2.13642	2.19107	1.97346	2.10095	1.55502		34	0.00476939	0.000748979	0.00258394	0.00197014	0.000947391	0.00402468	-0.000960068	-0.0013566	-0.0020581	0.00356497	-0.00625507	0.00532786	0.00177632	0.00246332	0.00563511	-0.0014269	-0.00194425	-0.00943363	-0.00633951	-0.000588154	-0.00898828	-0.0106229	0.00440314
34.3333	1.9509	1.63112	1.87759	1.77129	1.47541	1.47618	2.13037	2.32891	1.71832	2.1817	1.09137	2.34316	3.2135	3.17892	2.20314	3.13551	2.1062	2.00789	2.05951	2.17893	1.89811	2.01064	1.55431		34.3333	0.00385596	0.000946818	0.00252677	0.001986	0.00166981	0.00398382	-0.00111194	-0.00141836	-0.00188395	0.00387699	-0.00644095	0.00910937	0.00363006	0.00445364	0.00776578	-0.000507064	-0.000893338	-0.00892426	-0.00516049	0.000993542	-0.00881544	-0.0119302	0.0068177
34.6667	1.94152	1.63741	1.88002	1.78156	1.48312	1.46765	2.13037	2.32842	1.71899	2.1864	1.08298	2.3166	3.20661	3.1744	2.21265	3.15028	2.15034	2.08352	2.1452	2.21115	1.98352	2.11354	1.56987		34.6667	0.00295502	0.000979311	0.00198108	0.00209538	0.00205656	0.0040671	-0.000878935	-0.00143159	-0.00129446	0.00398986	-0.00595058	0.00657254	0.00340745	0.0039345	0.00794686	0.000638049	0.00235871	0.000525794	-0.000517193	0.00360158	-0.00139919	-0.00233445	0.00754115
35	1.94387	1.64089	1.88063	1.77836	1.48235	1.47618	2.1293	2.32695	1.71899	2.18796	1.08928	2.35164	3.22071	3.18656	2.22262	3.14396	2.12136	2.01558	2.08564	2.18703	1.91607	2.02542	1.57268		35	0.00307668	0.000896486	0.00203255	0.00112515	0.00183765	0.00513879	-0.000840374	-0.00126388	-0.000944576	0.00399147	-0.00619718	0.00716128	0.0037398	0.00391911	0.00705624	0.000796541	0.00174368	-0.00215207	-0.00109653	0.00320252	-0.00212982	-0.00510432	0.00776537
35.3333	1.94563	1.6388	1.88124	1.779	1.48158	1.46998	2.1293	2.32695	1.72098	2.18588	1.08928	2.30608	3.19729	3.15974	2.18602	3.14396	2.13745	2.05306	2.13383	2.19862	1.98296	2.09937	1.55431		35.3333	0.00302014	0.000740093	0.00188717	0.00117173	0.00179164	0.00511496	-0.000699105	-0.00116367	-0.000730366	0.00391407	-0.00601372	0.00288986	0.00182772	0.00180123	0.0040608	0.000580384	0.0017366	0.000588016	0.00225697	0.0029201	0.00268206	0.000721268	0.00521781
35.6667	1.95965	1.63392	1.88063	1.77643	1.47463	1.48543	2.1293	2.32548	1.71699	2.18744	1.08508	2.35774	3.22483	3.19037	2.22808	3.14712	2.1328	2.03087	2.09726	2.1951	1.927	2.0325	1.58319		35.6667	0.00279077	0.000886736	0.001563	0.00144297	0.00158888	0.00503648	-0.000469691	-0.00100547	-0.000503338	0.00374273	-0.00584235	0.000927386	0.00157974	0.00130118	0.00547677	0.00189455	0.00594808	0.00970481	0.0081615	0.00591363	0.0109203	0.0110968	0.00622791
36	1.94856	1.63741	1.88548	1.78028	1.48158	1.47695	2.12983	2.32646	1.71633	2.18953	1.08298	2.30032	3.19556	3.15589	2.19107	3.14185	2.13487	2.04929	2.11824	2.19157	1.96448	2.09252	1.55431		36	0.0034007	0.000730872	0.00127915	0.00122716	0.000882638	0.00486634	-0.000243767	-0.00104769	-0.000582096	0.00352403	-0.00540166	0.00781056	0.00515306	0.00467924	0.00946982	0.00300554	0.00675925	0.00882332	0.00556779	0.00668017	0.00690516	0.00397409	0.0100484
36.3333	1.94798	1.6388	1.88427	1.78156	1.48312	1.47618	2.12823	2.32449	1.71699	2.19161	1.07239	2.36943	3.22928	3.19453	2.23353	3.14993	2.13745	2.0325	2.10305	2.20515	1.93615	2.03576	1.58807		36.3333	0.00294964	0.00117123	0.00169811	0.00111762	0.000746142	0.00434002	-0.00028614	-0.0011157	-0.000437707	0.00329977	-0.00504832	0.00462321	0.00367088	0.00346967	0.00814864	0.00314292	0.00799463	0.0141541	0.00989156	0.00739588	0.0122523	0.0108934	0.00912571
36.6667	1.94856	1.63741	1.88184	1.7822	1.48389	1.48158	2.1309	2.32449	1.71965	2.19057	1.07875	2.33939	3.22722	3.19245	2.2439	3.16463	2.19107	2.1769	2.17385	2.24587	2.03793	2.17944	1.60399		36.6667	0.00255197	0.0013506	0.00199677	0.00126033	0.000898739	0.00367712	-0.000215478	-0.00112548	-0.000372087	0.0027929	-0.00429443	0.00195642	0.00352042	0.00343571	0.00839159	0.00472688	0.0126086	0.0239225	0.0167589	0.0103223	0.0200415	0.0217574	0.0101139
37	1.94505	1.6388	1.88487	1.77193	1.48849	1.48466	2.12769	2.32498	1.72031	2.19265	1.07026	2.36803	3.23372	3.19522	2.24045	3.15414	2.14416	2.04227	2.11301	2.21115	1.94753	2.04281	1.60331		37	0.00305432	0.00139803	0.00228973	0.00132452	0.000654071	0.004189	-0.000130688	-0.000980123	-0.000459583	0.00247167	-0.00422597	0.00366911	0.00444638	0.00439309	0.00909585	0.00490066	0.0124985	0.0266273	0.0154422	0.011125	0.0194453	0.0228504	0.0107186
37.3333	1.95441	1.6388	1.88608	1.78092	1.48466	1.48389	2.12983	2.32597	1.71832	2.19317	1.08192	2.31469	3.20902	3.1744	2.21415	3.15169	2.15496	2.08987	2.15445	2.21265	2.00403	2.12397	1.57689		37.3333	0.00285163	0.00149908	0.00261544	0.00205903	0.00129287	0.00333654	1.41498e-05	-0.000854172	-0.000463907	0.0023716	-0.00393694	0.0028227	0.00332238	0.0036606	0.00746163	0.00367209	0.00845544	0.0204138	0.012141	0.00819464	0.0141391	0.0166045	0.00910376
37.6667	1.95324	1.64158	1.88306	1.78092	1.48235	1.48389	2.1293	2.32498	1.71699	2.19525	1.07026	2.30895	3.20213	3.16498	2.21215	3.14607	2.14416	2.06808	2.1359	2.20013	1.98352	2.10987	1.56846		37.6667	0.00253469	0.00216822	0.00287738	0.00282921	0.00170891	0.00320419	0.000106003	-0.000760397	-0.000385017	0.00229586	-0.00320016	0.00303081	0.00342049	0.00408265	0.00813221	0.00345323	0.00731371	0.0192961	0.0108338	0.00696538	0.0124404	0.014287	0.00868484
38	1.96547	1.63671	1.88245	1.78028	1.47541	1.48849	2.1293	2.32351	1.71699	2.19525	1.07558	2.37502	3.23987	3.19937	2.24587	3.15729	2.1524	2.06219	2.11928	2.21615	1.95037	2.04389	1.60606		38	0.00283904	0.0026171	0.00307555	0.00363259	0.00203346	0.00262474	0.000183728	-0.000621331	-0.000205716	0.00190392	-0.0019675	0.0017322	0.00165702	0.0018318	0.00467112	0.0018757	0.00221993	0.00970904	0.00742633	0.00299571	0.00706658	0.00709729	0.00538644
38.3333	1.95266	1.64367	1.8885	1.77964	1.48235	1.48389	2.12876	2.32351	1.71766	2.19421	1.07133	2.32422	3.2135	3.18378	2.23007	3.15379	2.16366	2.12968	2.16213	2.22212	2.01503	2.14159	1.59015		38.3333	0.00415389	0.00265141	0.00324476	0.00391711	0.00156969	0.00334341	0.000201416	-0.000540409	-0.000245074	0.00184088	-0.00160796	0.000478663	4.16401e-05	0.000480333	0.00284378	0.000358422	-0.00234588	0.00361016	0.00432166	-0.000548026	0.00191981	0.000869025	0.00308629
38.6667	1.95499	1.64089	1.88971	1.7854	1.48543	1.48773	2.1293	2.32351	1.71699	2.19473	1.07452	2.34505	3.2303	3.1966	2.24931	3.17161	2.20214	2.17538	2.19006	2.25471	2.04767	2.18754	1.6143		38.6667	0.00454356	0.00306599	0.00367827	0.00456422	0.00186246	0.00305757	0.000127229	-0.00025891	-0.000472832	0.00164159	-0.000685321	-0.00570604	-0.00403871	-0.00382216	-0.00228272	-0.00143704	-0.0057591	-0.00130534	0.00257435	-0.00441739	0.000219589	0.000587358	-0.00147938
39	1.95674	1.64713	1.89333	1.78923	1.48619	1.49079	2.1293	2.32351	1.71699	2.19681	1.06706	2.35023	3.2327	3.1966	2.25275	3.17057	2.1951	2.17893	2.19157	2.25373	2.04821	2.19107	1.61976		39	0.00446502	0.00348543	0.00394398	0.00522816	0.00255839	0.00255815	7.12074e-06	-0.00023623	-0.000577895	0.00136055	-0.000880329	-0.000590428	-0.00269141	-0.002351	-0.00119673	-0.00247281	-0.00998452	-0.0118196	-0.00368503	-0.00723308	-0.00992301	-0.0130138	-0.00167826
39.3333	1.96024	1.64297	1.89333	1.78796	1.48926	1.48696	2.12983	2.32302	1.71699	2.19629	1.07558	2.35211	3.21968	3.18482	2.22212	3.14256	2.11197	2.01393	2.08987	2.1845	1.9178	2.01448	1.58598		39.3333	0.00414869	0.00334738	0.00383854	0.00568248	0.00262494	0.00210763	0.000229634	-0.000122938	-0.000420292	0.00118867	-0.000354748	-0.00346533	-0.003468	-0.00281775	-0.000906015	-0.0020523	-0.00737467	-0.00340043	0.000108772	-0.00519304	-0.00464318	-0.00472437	-0.00142437
39.6667	1.95907	1.64644	1.89393	1.79305	1.48849	1.48849	2.13037	2.32351	1.71766	2.19629	1.07239	2.32944	3.21968	3.18587	2.23897	3.16044	2.17335	2.14107	2.17335	2.22808	2.0276	2.14674	1.59916		39.6667	0.00330375	0.00347839	0.00396426	0.00486473	0.00318711	0.00276559	0.000141257	3.24201e-05	-0.000219031	0.00111305	-0.000964477	0.00271346	-0.0011197	-0.000683583	0.00143624	-0.00213793	-0.0100377	-0.0121008	-0.00505808	-0.00657616	-0.0120807	-0.0158591	0.000444558
40	1.96663	1.64713	1.89453	1.79496	1.48926	1.49232	2.13037	2.32351	1.71633	2.19629	1.07558	2.36102	3.22483	3.18552	2.23551	3.14712	2.11667	2.01832	2.10673	2.18905	1.9247	2.02324	1.59085		40	0.00280154	0.00341745	0.00405443	0.00471622	0.00351573	0.00274429	0.00045894	0.000326877	8.7097e-06	0.00100667	0.000322085	0.000522318	-0.00136356	-0.00105627	0.00154321	-0.00136972	-0.00693627	-0.00491301	-0.000854825	-0.00465952	-0.00546565	-0.00765651	0.00108269
40.3333	1.96547	1.64921	1.89694	1.79432	1.48926	1.49309	2.12983	2.324	1.71766	2.19992	1.06813	2.31039	3.19902	3.16463	2.21365	3.14467	2.12501	2.07927	2.14828	2.19661	1.98296	2.0999	1.57479		40.3333	0.00261568	0.00373519	0.00354371	0.00444945	0.00361566	0.0026921	0.000635436	0.000320389	4.81458e-05	0.000986148	-3.51064e-05	-0.00442737	-0.00399557	-0.00387468	-0.000794232	-0.0026557	-0.00796181	-0.00629053	-0.000568399	-0.00613821	-0.00450055	-0.00506286	-0.00236392
40.6667	1.96837	1.65197	1.89694	1.79687	1.49232	1.49232	2.12823	2.32498	1.71633	2.19785	1.07452	2.31182	3.20006	3.16603	2.21565	3.14712	2.13487	2.07927	2.14777	2.19711	1.98853	2.1104	1.5804		40.6667	0.00352367	0.00366518	0.00238966	0.00392993	0.00291242	0.00317471	0.000631947	0.000446573	-0.000149086	0.000924534	0.00057476	0.0022951	-0.000634831	-0.00130213	0.00165879	-0.00212438	-0.00870855	-0.0117427	-0.00426691	-0.00601006	-0.0114358	-0.016128	5.56851e-05
41	1.96663	1.65266	1.89814	1.79814	1.4969	1.49309	2.1293	2.324	1.71699	2.19577	1.07239	2.36569	3.22517	3.19037	2.24291	3.14748	2.12241	2.03793	2.11719	2.1946	1.92642	2.02324	1.5964		41	0.00319494	0.0035599	0.00165884	0.00297779	0.00267772	0.00297555	0.000691894	0.000372155	-0.000140313	0.000763484	0.000840972	-0.00100883	-0.00165735	-0.00195404	0.00122872	-0.00209653	-0.00721753	-0.00587136	-0.00130482	-0.00473427	-0.00696931	-0.00783264	-0.00131902
41.3333	1.96605	1.6499	1.89874	1.7975	1.49079	1.49003	2.13037	2.32498	1.71699	2.19889	1.07345	2.30656	3.20213	3.16952	2.22312	3.14712	2.13797	2.09304	2.15496	2.20264	1.98742	2.11092	1.58459		41.3333	0.00244699	0.00320186	0.00131276	0.00239746	0.0023492	0.00261793	0.000847103	0.000417459	-0.000179721	0.000636677	0.0016105	-0.00261125	-0.00150571	-0.00162545	0.00177898	-0.000933093	-0.00255628	0.00156663	0.00370227	-0.00138798	-0.000164173	0.00238823	-0.000278577
41.6667	1.96663	1.65335	1.90054	1.79687	1.49232	1.50071	2.13037	2.32498	1.71633	2.19889	1.06919	2.37409	3.22722	3.19314	2.24784	3.15063	2.12241	2.03576	2.11771	2.19611	1.93558	2.03141	1.60124		41.6667	0.00195939	0.00359614	0.00139537	0.00217422	0.00222671	0.00310442	0.000945844	0.000352752	-0.000267352	0.000653791	0.00146811	0.00237271	0.00201662	0.001678	0.00562952	0.00151552	0.00283473	0.0103577	0.00803524	0.00386139	0.00412549	0.00809585	0.00454058
42	1.96314	1.65335	1.90114	1.79814	1.49461	1.49614	2.13305	2.32548	1.71832	2.19889	1.0777	2.33891	3.22448	3.1876	2.25324	3.16289	2.17385	2.16519	2.17995	2.23056	2.0325	2.16162	1.61703		42	0.00159158	0.0029163	0.00146186	0.00155696	0.00244194	0.00304116	0.00108693	0.000436768	-0.000223498	0.000585314	0.00245184	0.00221301	0.00204806	0.001929	0.00524918	0.00108512	0.00178191	0.00719815	0.00551593	0.00332156	0.00253605	0.00665638	0.00434625
42.3333	1.96953	1.6568	1.89994	1.7994	1.49614	1.49766	2.13251	2.32302	1.71766	2.19837	1.07133	2.31708	3.20696	3.17196	2.23304	3.14712	2.14107	2.102	2.15957	2.20815	1.99463	2.11824	1.58528		42.3333	0.00123417	0.00276004	0.00150457	0.00144741	0.00216951	0.00277812	0.00117871	0.000517584	-0.00011394	0.000609106	0.00281462	0.00552121	0.00422708	0.00413904	0.00740734	0.00273684	0.00577497	0.0109207	0.00736677	0.00604069	0.00509058	0.00779828	0.00664788
42.6667	1.97069	1.66024	1.89574	1.80004	1.4969	1.50071	2.1309	2.32597	1.715	2.19837	1.07664	2.37827	3.23407	3.19625	2.25324	3.15554	2.13435	2.06647	2.1359	2.20965	1.94242	2.03631	1.61293		42.6667	0.00105096	0.00231349	0.00126661	0.00184292	0.00172129	0.0027776	0.0011823	0.000511079	-0.000412105	0.000615738	0.00371349	0.00915793	0.00557354	0.00523662	0.00777897	0.00159447	0.00210907	0.000304025	0.00170305	0.00356129	-0.00332028	-0.00356131	0.00621656
43	1.97184	1.65542	1.89574	1.79877	1.49766	1.49995	2.13251	2.324	1.71633	2.19889	1.0777	2.32041	3.21246	3.17614	2.23897	3.15344	2.14468	2.12136	2.16672	2.21515	1.99961	2.14828	1.58807		43	0.00128343	0.00233891	0.00127444	0.00180021	0.0017042	0.00271203	0.00109764	0.000514306	-0.000543746	0.0010021	0.00390214	0.00767648	0.00560473	0.00503648	0.00806766	0.00360928	0.00637858	0.0106594	0.00661473	0.00819197	0.00582068	0.00793821	0.00683342
43.3333	1.96721	1.65749	1.89994	1.7994	1.49538	1.49614	2.13358	2.32548	1.71633	2.19941	1.08087	2.31564	3.20661	3.17161	2.22957	3.14607	2.13435	2.08564	2.15906	2.20063	1.98686	2.11876	1.58807		43.3333	0.00134107	0.00257363	0.00120308	0.00182089	0.00149297	0.00263536	0.000949114	0.000666317	-0.000526123	0.00110463	0.00471273	0.00784426	0.00550304	0.00468246	0.00711033	0.0039029	0.00638063	0.00875625	0.00685727	0.00751583	0.00498342	0.00569876	0.00684325
43.6667	1.97011	1.66161	1.90234	1.80131	1.49843	1.50375	2.13358	2.32449	1.71566	2.19941	1.07981	2.38199	3.23953	3.20247	2.26107	3.15834	2.14055	2.08352	2.14468	2.21565	1.94753	2.05145	1.62181		43.6667	0.00120374	0.00259577	0.00117146	0.00187519	0.00178468	0.0021384	0.000638561	0.000646885	-0.0006138	0.000769265	0.00480809	0.00694874	0.00482953	0.0042061	0.00584359	0.00311737	0.00446523	0.00357251	0.00517373	0.00556494	0.00190604	0.00227883	0.00535111
44	1.96953	1.65611	1.90354	1.80004	1.50071	1.50375	2.13411	2.32695	1.71699	2.19941	1.08508	2.32469	3.21487	3.18135	2.24833	3.15519	2.15291	2.1198	2.17487	2.22212	2.01393	2.15034	1.60262		44	0.00126073	0.00214964	0.00108456	0.00173732	0.00136675	0.00116317	0.00034574	0.000727741	-0.000495371	0.000820558	0.00532302	0.00652185	0.00463302	0.00401047	0.00553273	0.0032693	0.00554698	0.00233277	0.00549779	0.00516204	0.000897677	-5.23181e-05	0.00559502
44.3333	1.97242	1.66024	1.90414	1.80194	1.49766	1.50223	2.13358	2.32695	1.71699	2.20096	1.08298	2.38709	3.23919	3.20247	2.26254	3.16079	2.14725	2.06968	2.14262	2.21565	1.95037	2.04875	1.61908		44.3333	0.00117668	0.00199918	0.00112835	0.00151569	0.0013802	0.00129881	0.000169296	0.000734238	-0.000319998	0.000793235	0.00530368	0.00605941	0.00395332	0.00381561	0.00433885	0.00271291	0.00327398	-0.00334113	0.00323821	0.00319425	-0.0013395	-0.00184525	0.0044522
44.6667	1.96779	1.65818	1.90174	1.807	1.49614	1.50299	2.13305	2.32646	1.71367	2.20148	1.08718	2.36336	3.22654	3.19245	2.24931	3.14361	2.11928	2.03305	2.12709	2.19812	1.92929	2.03033	1.59986		44.6667	0.000968906	0.00206491	0.00120777	0.00138188	0.00120927	0.00108266	0.000215171	0.000637274	-0.000135935	0.000871803	0.00619475	0.00819225	0.00547973	0.00524203	0.00607384	0.00397621	0.00687112	0.0011852	0.00519874	0.00567759	0.00175242	6.43193e-05	0.00716755
45	1.97416	1.66299	1.90294	1.80447	1.50223	1.50299	2.13305	2.32646	1.71367	2.20252	1.08928	2.36242	3.24123	3.20247	2.27569	3.18274	2.20264	2.20965	2.20565	2.27374	2.06754	2.20965	1.632		45	0.00107576	0.00198777	0.00140945	0.00150663	0.00149928	0.000841936	0.000201089	0.000465711	0.000131453	0.000629067	0.00612457	0.00520464	0.00468353	0.00447115	0.00598279	0.00523089	0.0114706	0.0118836	0.00987709	0.00973165	0.0112572	0.0120624	0.00747104
45.3333	1.97011	1.66436	1.90294	1.80384	1.49843	1.50526	2.13465	2.32744	1.71633	2.202	1.09242	2.38801	3.24498	3.20489	2.26839	3.16568	2.15342	2.0867	2.1606	2.22312	1.95772	2.05414	1.62725		45.3333	0.00148361	0.0023273	0.0010211	0.00137733	0.00141915	0.000952071	0.000151554	0.000611183	0.000144631	0.000499116	0.00625314	0.0102279	0.00658106	0.00615716	0.00743909	0.00549126	0.0106709	0.00819738	0.00738446	0.00936855	0.00569471	0.00138833	0.0088245
45.6667	1.97011	1.66299	1.90294	1.80384	1.49995	1.50147	2.13251	2.32695	1.71433	2.19992	1.08928	2.32517	3.21625	3.18135	2.24144	3.15554	2.14828	2.09726	2.17538	2.21515	1.99851	2.13228	1.59847		45.6667	0.00187263	0.00234353	0.000573234	0.00117254	0.00148436	0.00105681	0.000204391	0.000488201	0.000433808	0.000645789	0.00612768	0.00426323	0.00420922	0.00393283	0.00498179	0.00510191	0.0106235	0.0132591	0.00951978	0.00928922	0.0100542	0.0110659	0.00612651
46	1.97358	1.6623	1.90234	1.8032	1.49919	1.50071	2.13198	2.32744	1.71633	2.20148	1.09555	2.39263	3.24703	3.2073	2.2752	3.16812	2.16927	2.08882	2.16417	2.22709	1.96336	2.06058	1.63268		46	0.00164338	0.00255876	0.000422796	0.000776081	0.00112299	0.000629948	0.000190322	0.000501088	0.000574128	0.000635485	0.00605959	0.00258703	0.00299908	0.00274133	0.00333802	0.0041189	0.00864608	0.0102225	0.00879496	0.0067205	0.0079743	0.00839624	0.00451307
46.3333	1.97242	1.66367	1.90234	1.80384	1.50375	1.50299	2.13358	2.32695	1.71766	2.20096	1.09763	2.32755	3.21934	3.18587	2.24439	3.15904	2.15291	2.10253	2.17842	2.22013	2.00513	2.15085	1.60468		46.3333	0.00174443	0.00296147	0.000414874	0.000667669	0.00115313	0.000787539	0.000229109	0.000339332	0.000646499	0.000563652	0.00592591	0.00499645	0.00414533	0.00378147	0.00395927	0.00434987	0.00822333	0.00968919	0.00793558	0.00658583	0.00523559	0.00439091	0.00572697
46.6667	1.97589	1.66778	1.90234	1.80447	1.50071	1.5045	2.13358	2.32548	1.71566	2.20252	1.10281	2.39125	3.24703	3.21006	2.2718	3.16743	2.16672	2.08246	2.16519	2.236	1.96617	2.06219	1.632		46.6667	0.00174692	0.00271724	0.000546925	0.000292049	0.00145992	0.00100245	0.000353311	0.000401039	0.000913539	0.000423752	0.00616251	0.000789905	0.00241826	0.00238429	0.00302985	0.00408995	0.0088618	0.0133481	0.0103245	0.00695516	0.00969461	0.011305	0.00478054
47	1.97416	1.66436	1.90534	1.807	1.50526	1.50375	2.13358	2.32744	1.71699	2.19992	1.10281	2.36476	3.24362	3.20592	2.27666	3.18621	2.21515	2.21465	2.21814	2.28102	2.07448	2.21465	1.6428		47	0.00212936	0.00284047	0.000833637	-3.43783e-05	0.00138976	0.00105494	0.000452046	0.000481261	0.00130554	0.000423725	0.00587339	0.00399627	0.00340768	0.0033986	0.00365206	0.00435306	0.00850961	0.0104723	0.00843631	0.00612734	0.00614257	0.00550398	0.00564826
47.3333	1.97704	1.66641	1.90414	1.80447	1.50147	1.50526	2.13518	2.32842	1.71699	2.20148	1.10385	2.39494	3.24941	3.21178	2.27811	3.17091	2.17131	2.10515	2.1708	2.23897	1.97122	2.05951	1.632		47.3333	0.00172373	0.00245214	0.000795396	0.000413722	0.000870633	0.00122743	0.000486091	0.000490158	0.00123285	0.00049909	0.00582185	0.00454165	0.00236582	0.00292549	0.00184168	0.00108306	0.00173681	-0.00253752	0.00149497	0.000778532	-0.00463973	-0.00860269	0.00293047
47.6667	1.97647	1.66915	1.90474	1.80573	1.50299	1.50678	2.13518	2.32793	1.71899	2.20459	1.10385	2.33608	3.22688	3.19176	2.25275	3.16812	2.17385	2.14983	2.1946	2.24045	2.02542	2.17131	1.61635		47.6667	0.00242826	0.00273819	0.00095887	0.000568945	0.00136837	0.00144138	0.000507999	0.000465624	0.000996862	0.000854726	0.0057664	0.00492918	0.00393232	0.00432018	0.00496347	0.00478047	0.0100156	0.0179747	0.00828503	0.00981333	0.0105428	0.0110839	0.00573962
48	1.97531	1.6712	1.90474	1.80384	1.50147	1.50602	2.13358	2.32842	1.71766	2.20303	1.10488	2.39402	3.24941	3.21143	2.2752	3.17196	2.16774	2.10095	2.17436	2.23205	1.96898	2.06487	1.63335		48	0.00225035	0.00344754	0.00117724	0.000609628	0.000977338	0.00243863	0.00101217	0.000682734	0.00128181	0.0012952	0.00604817	0.0133879	0.00779291	0.00737304	0.00821856	0.00604742	0.00938402	0.0168189	0.00625327	0.0102359	0.00393621	-0.00142116	0.00911677

## Sheet: Radius-slope 30s
t (h)	Radius [mm]																					t (h)	Slope
2.66667																						2.66667
3	0.615448														0.654854							3
3.33333	0.710123	0.577184	0.579157			0.615448									0.850193	0.664904						3.33333
3.66667	0.790702	0.646194	0.687263	0.640876		0.74156	0.682264	0.565199	0.585037	0.615448				0.619145	0.970395	0.779669	0.575824	0.589106				3.66667
4	0.859825	0.716521	0.773193	0.727581	0.569222	0.845103	0.774668	0.656702	0.698786	0.714927			0.773193	0.719698	1.07521	0.884597	0.761017	0.71303	0.789529			4
4.33333	0.932395	0.786361	0.850486	0.813461	0.665332	0.92379	0.851826	0.74463	0.774668	0.800738			0.869064	0.800738	1.17445	0.983968	0.879585	0.831794	0.906808			4.33333	0.196775	0.181212	0.205798	0.193439	0.180388	0.252046	0.235389	0.26028	0.22016	0.250963	0.277079	0.237037	0.226442	0.219943	0.286272	0.262466	0.274162	0.288811	0.241668	0.16682
4.66667	0.987078	0.839686	0.926257	0.86775	0.724438	1.0054	0.925024	0.8356	0.842399	0.880799		0.635513	0.943343	0.871685	1.25806	1.07521	0.97494	0.926104	1.00508			4.66667	0.196346	0.178467	0.199745	0.189652	0.176048	0.248217	0.237731	0.260576	0.2177	0.24852	0.270773	0.233336	0.222432	0.219429	0.281312	0.258252	0.263551	0.283092	0.236142	0.160621
5	1.05523	0.91635	0.983604	0.949371	0.796453	1.08613	0.999711	0.922554	0.918837	0.964867	0.639093	0.729148	1.01556	0.946965	1.34057	1.1612	1.05968	1.02684	1.08238			5	0.197552	0.177317	0.19348	0.190035	0.172858	0.24529	0.240915	0.261345	0.215479	0.247507	0.267877	0.228834	0.2202	0.219408	0.27742	0.254272	0.253905	0.280542	0.230653	0.159221
5.33333	1.11106	0.955361	1.04872	0.995136	0.850486	1.16225	1.07875	1.0088	0.989387	1.03998	0.746161	0.813461	1.0945	1.01669	1.42451	1.24036	1.13813	1.11854	1.1612			5.33333	0.193035	0.174452	0.188722	0.187613	0.169716	0.24493	0.244521	0.262333	0.212797	0.251274	0.268688	0.225434	0.220392	0.216507	0.260529	0.250424	0.245928	0.27757	0.226589	0.158069
5.66667	1.16323	1.01219	1.11003	1.04872	0.896208	1.24289	1.15831	1.09346	1.06492	1.11924	0.8356	0.891101	1.16225	1.09033	1.50671	1.31728	1.20694	1.20603	1.22602	0.620181		5.66667	0.19198	0.168532	0.176019	0.185548	0.167715	0.237902	0.24743	0.261945	0.211297	0.252161	0.267071	0.221648	0.21821	0.215782	0.252311	0.24105	0.238504	0.274339	0.22238	0.160088
6	1.2309	1.07981	1.15536	1.11618	0.954166	1.30905	1.23645	1.17494	1.12331	1.19897	0.921317	0.960126	1.23737	1.15634	1.58674	1.38677	1.27897	1.28586	1.30039	0.682944		6	0.195026	0.165404	0.165795	0.181315	0.166262	0.232537	0.250657	0.261263	0.205961	0.247087	0.262151	0.217197	0.214548	0.214441	0.246876	0.232888	0.216276	0.265831	0.217261	0.160646
6.33333	1.29327	1.11822	1.21316	1.16714	1.00313	1.4049	1.3212	1.26021	1.18557	1.30818	1.01331	1.03448	1.3108	1.21033	1.67022	1.46128	1.3537	1.36831	1.36912	0.731394		6.33333	0.196101	0.161307	0.156727	0.176255	0.159885	0.22861	0.253525	0.259916	0.203689	0.242963	0.257156	0.213725	0.207827	0.214685	0.242365	0.226751	0.202215	0.258656	0.203963	0.161383
6.66667	1.36703	1.17688	1.26563	1.22439	1.05631	1.46765	1.40976	1.35362	1.26111	1.36369	1.09346	1.109	1.37037	1.30031	1.75791	1.54581	1.41751	1.45369	1.43994	0.782499		6.66667	0.198598	0.158565	0.149268	0.172542	0.156789	0.223759	0.255963	0.257743	0.201006	0.237929	0.251214	0.210538	0.201804	0.215183	0.238996	0.222105	0.191141	0.253927	0.1939	0.15852
7	1.4473	1.24013	1.30818	1.30556	1.109	1.54417	1.50299	1.44493	1.32723	1.44888	1.18172	1.17494	1.44335	1.37535	1.84264	1.61846	1.47707	1.55223	1.5023	0.835771		7	0.201509	0.157469	0.142294	0.171174	0.1534	0.222697	0.257165	0.254818	0.196989	0.237158	0.247484	0.201673	0.197475	0.212505	0.235662	0.21771	0.180574	0.249731	0.184439	0.157044
7.33333	1.4969	1.27729	1.36286	1.34601	1.15634	1.64019	1.59862	1.53677	1.38692	1.56909	1.27908	1.24472	1.52708	1.42346	1.9173	1.68865	1.5408	1.63274	1.57134	0.887092		7.33333	0.202507	0.155821	0.135539	0.168393	0.149839	0.218645	0.255438	0.250357	0.192478	0.232774	0.238783	0.193328	0.191395	0.210531	0.232331	0.215032	0.171076	0.245421	0.17495	0.155296
7.66667	1.56836	1.32379	1.40652	1.40246	1.21128	1.709	1.6875	1.61425	1.45908	1.6388	1.35866	1.30731	1.58068	1.50602	1.9875	1.76419	1.59646	1.71075	1.63071	0.947342		7.66667	0.201479	0.152157	0.130365	0.163905	0.145486	0.210084	0.252006	0.245867	0.19	0.221338	0.229694	0.18572	0.183413	0.210523	0.229706	0.211683	0.161462	0.24087	0.166183	0.154607
8	1.65887	1.39594	1.44335	1.47695	1.26473	1.76095	1.7745	1.70231	1.53305	1.67461	1.42265	1.36369	1.62972	1.60361	2.06495	1.82576	1.6469	1.79586	1.6788	0.99957		8	0.200712	0.151109	0.12438	0.161307	0.140824	0.200604	0.246761	0.239616	0.186675	0.208726	0.220055	0.177677	0.174433	0.209212	0.225994	0.207316	0.151053	0.235635	0.157173	0.151897
8.33333	1.70298	1.42906	1.48081	1.50678	1.31427	1.82459	1.84511	1.77836	1.58932	1.74468	1.49309	1.42826	1.68953	1.66641	2.13443	1.89818	1.69192	1.86588	1.7217	1.0555		8.33333	0.194954	0.147732	0.118647	0.155282	0.13486	0.189764	0.239909	0.231948	0.18281	0.194682	0.210245	0.169506	0.165919	0.206914	0.221569	0.20081	0.141472	0.228227	0.149483	0.150017
8.66667	1.77322	1.48004	1.52484	1.55007	1.3595	1.88669	1.92914	1.85436	1.64505	1.807	1.55228	1.48849	1.73747	1.73221	2.20674	1.96625	1.73895	1.9442	1.77294	1.08951		8.66667	0.190504	0.147474	0.113487	0.151982	0.128496	0.185979	0.232375	0.223332	0.175614	0.190339	0.203016	0.161657	0.161305	0.199435	0.217266	0.194074	0.133468	0.220651	0.142618	0.14681
9	1.85375	1.55007	1.55375	1.63322	1.40328	1.99027	2.0108	1.92559	1.69761	1.92441	1.63462	1.5323	1.81267	1.77257	2.2816	2.02605	1.77605	2.02496	1.80873	1.14298		9	0.182665	0.14434	0.111038	0.144525	0.120882	0.177267	0.224451	0.21735	0.173007	0.177717	0.194346	0.157678	0.154433	0.197811	0.215478	0.19096	0.128093	0.214267	0.139635	0.144592
9.33333	1.89934	1.57345	1.59362	1.65128	1.43065	2.03	2.07503	1.99027	1.74599	1.96373	1.69492	1.57779	1.85559	1.84201	2.35596	2.10156	1.82152	2.08943	1.85221	1.18756		9.33333	0.179378	0.147312	0.109605	0.146048	0.115	0.171123	0.219192	0.214032	0.173283	0.168254	0.188975	0.155849	0.151054	0.198356	0.213111	0.18572	0.124256	0.207587	0.137546	0.141079
9.66667	1.95441	1.61707	1.63531	1.69761	1.46532	2.05292	2.14478	2.06731	1.82209	1.97126	1.74206	1.62832	1.88427	1.92973	2.4344	2.15915	1.85578	2.1571	1.89585	1.24303		9.66667	0.171885	0.14682	0.113084	0.143983	0.108284	0.173106	0.214534	0.209647	0.170583	0.174889	0.186201	0.155197	0.154414	0.192714	0.20715	0.178101	0.121059	0.19745	0.135902	0.137218
10	2.03673	1.6875	1.65335	1.77129	1.51131	2.09799	2.2113	2.12715	1.86418	2.02212	1.79814	1.66915	1.92678	1.98281	2.49583	2.21224	1.88709	2.22122	1.94022	1.28328		10	0.171249	0.1549	0.116782	0.148106	0.102974	0.166696	0.206761	0.201894	0.168456	0.167004	0.179573	0.153483	0.152669	0.190177	0.195766	0.169362	0.117324	0.185292	0.13314	0.133559
10.3333	2.05292	1.69761	1.69358	1.77836	1.53305	2.14956	2.27939	2.19005	1.92381	2.06511	1.85682	1.71699	1.97126	2.04456	2.5601	2.25872	1.92478	2.27529	1.98583	1.32898		10.3333	0.162114	0.153843	0.119912	0.148145	0.0974106	0.161477	0.198593	0.192842	0.163591	0.16305	0.171593	0.150973	0.152865	0.184632	0.181423	0.158013	0.111503	0.171607	0.128007	0.128502
10.6667	2.13037	1.78732	1.72164	1.85682	1.56836	2.24916	2.34745	2.25017	1.9509	2.18013	1.93151	1.75965	2.04735	2.07722	2.62616	2.31478	1.96118	2.34231	2.02823	1.3667		10.6667	0.151802	0.152225	0.118642	0.146967	0.0923582	0.14996	0.186495	0.181271	0.15809	0.149414	0.160201	0.14657	0.147249	0.180298	0.165179	0.146535	0.10376	0.156162	0.11884	0.123368
11	2.14956	1.80131	1.77257	1.86295	1.58788	2.26684	2.41122	2.33282	2.03673	2.17699	1.97647	1.8327	2.07777	2.17594	2.70862	2.39504	2.01456	2.41709	2.09471	1.42296		11	0.137847	0.140749	0.115115	0.13574	0.0866034	0.13749	0.173731	0.168135	0.149901	0.134779	0.146771	0.141017	0.138829	0.172967	0.148263	0.134478	0.0945013	0.141009	0.107516	0.116702
11.3333	2.23236	1.89333	1.8177	1.96547	1.63252	2.33673	2.49631	2.41642	2.11802	2.2451	2.05403	1.89814	2.14584	2.25625	2.76235	2.43031	2.06013	2.45969	2.14012	1.45445		11.3333	0.127716	0.133595	0.10654	0.129306	0.0819974	0.129566	0.160456	0.154524	0.139172	0.126781	0.134206	0.132528	0.132228	0.160952	0.131508	0.121975	0.0833812	0.126798	0.0927304	0.109395
11.6667	2.26281	1.92381	1.8885	1.99199	1.65611	2.43898	2.55637	2.4604	2.15009	2.40031	2.11208	1.94915	2.23338	2.28439	2.7922	2.45969	2.08943	2.48206	2.17038	1.49419		11.6667	0.11299	0.118519	0.0976417	0.115293	0.074986	0.119532	0.14618	0.139285	0.126395	0.116857	0.121514	0.122862	0.124121	0.147754	0.11615	0.11164	0.0719939	0.11207	0.0770562	0.101335
12	2.37643	2.064	1.92737	2.09636	1.68953	2.40696	2.5808	2.4899	2.19889	2.31071	2.11909	1.98281	2.23695	2.36295	2.80129	2.48873	2.11048	2.51216	2.18964	1.52711		12	0.098052	0.101774	0.0881826	0.100683	0.0679679	0.109593	0.131639	0.1247	0.114434	0.107371	0.108963	0.112436	0.116955	0.132698	0.102932	0.101428	0.0597528	0.0979061	0.0615098	0.0939574
12.3333	2.31958	2.0108	1.96547	2.0838	1.70432	2.47474	2.6242	2.51996	2.20821	2.42067	2.15751	2.02155	2.30873	2.3615	2.81663	2.51128	2.11623	2.531	2.20273	1.54867		12.3333	0.0862684	0.0874183	0.0758979	0.0887738	0.0618802	0.0947775	0.116091	0.109524	0.101907	0.0918756	0.0950129	0.0995628	0.104783	0.119746	0.0898012	0.091313	0.0469913	0.0843481	0.0474589	0.0854507
12.6667	2.36633	2.06897	1.96431	2.13785	1.72495	2.45576	2.64369	2.54205	2.24865	2.36536	2.16332	2.03673	2.29336	2.42679	2.84164	2.53972	2.12249	2.55404	2.19921	1.57415		12.6667	0.0739872	0.0717504	0.0629827	0.0754913	0.0554443	0.0833271	0.101689	0.0943475	0.0891843	0.0812914	0.0826461	0.0871099	0.0947654	0.103859	0.0780704	0.0808923	0.0350982	0.0710348	0.0349898	0.0771727
13	2.35812	2.01647	1.97069	2.09091	1.73353	2.47888	2.67202	2.56484	2.26634	2.38601	2.18536	2.05625	2.30972	2.44645	2.86835	2.56139	2.12405	2.58031	2.1972	1.60544		13	0.0630371	0.0579296	0.0499201	0.0630121	0.0491215	0.0740856	0.0873266	0.0796391	0.0753543	0.0718766	0.071726	0.0740116	0.0840197	0.0880582	0.0680633	0.0713207	0.0247473	0.0601482	0.0248219	0.068589
13.3333	2.40031	2.06787	1.96024	2.13251	1.75641	2.5027	2.69541	2.59535	2.28289	2.41264	2.20355	2.07007	2.33576	2.47104	2.8929	2.5863	2.12613	2.60164	2.19116	1.62256		13.3333	0.050744	0.0413364	0.0387395	0.0475215	0.042357	0.0659861	0.075192	0.0688261	0.0649741	0.0636481	0.0621974	0.0646274	0.0753846	0.074574	0.0630657	0.0663281	0.0180869	0.053493	0.0195642	0.0619911
13.6667	2.39174	2.04679	1.9782	2.11802	1.75901	2.52042	2.72445	2.61506	2.30329	2.42867	2.22673	2.09473	2.35763	2.49448	2.92217	2.6135	2.12873	2.61731	2.19519	1.64286		13.6667	0.0456466	0.0333206	0.0290133	0.0414494	0.0377424	0.0598879	0.0667393	0.0621209	0.0594416	0.0564316	0.0564811	0.0576612	0.0681876	0.0657214	0.0601834	0.0614999	0.014782	0.0484437	0.0179996	0.054965
14	2.40743	2.05791	1.98798	2.13572	1.77322	2.57638	2.74864	2.63591	2.31564	2.50179	2.26181	2.11424	2.41737	2.4821	2.94666	2.63288	2.13133	2.63204	2.20273	1.66093		14	0.0384582	0.0231266	0.025313	0.0327727	0.0331591	0.061584	0.0606424	0.0566203	0.0540211	0.0629503	0.0536685	0.0528832	0.0669437	0.0562609	0.057308	0.0566124	0.0138815	0.0426512	0.0195397	0.0494417
14.3333	2.41878	2.07338	1.99714	2.15009	1.78028	2.56172	2.76147	2.65489	2.34307	2.47012	2.26886	2.12286	2.40601	2.53351	2.96125	2.65087	2.13547	2.64252	2.21723	1.6722		14.3333	0.0408027	0.0260667	0.0242773	0.0327276	0.0300671	0.0539315	0.0532992	0.0511468	0.0524352	0.0528815	0.0479453	0.0486918	0.0602544	0.0547028	0.0529315	0.0525798	0.0144954	0.0372877	0.0213729	0.0439458
14.6667	2.45855	2.11262	2.00113	2.19109	1.79623	2.61287	2.78533	2.66946	2.35133	2.54429	2.29486	2.14691	2.45576	2.52358	2.978	2.66667	2.14167	2.65212	2.22619	1.68603		14.6667	0.0373623	0.0247688	0.0253943	0.0331615	0.0273595	0.0550105	0.0478776	0.045828	0.0479593	0.0580178	0.0451517	0.0467506	0.0623482	0.0465921	0.0471167	0.0475698	0.0147856	0.0314695	0.0242012	0.0378246
15	2.44925	2.09581	2.01816	2.17646	1.80004	2.59623	2.79065	2.68395	2.37979	2.50179	2.29535	2.16226	2.44038	2.56617	2.988	2.67784	2.15094	2.66128	2.24004	1.69844		15	0.0346657	0.0259818	0.0261604	0.0346498	0.0245056	0.0496379	0.0410934	0.0395766	0.0449562	0.0523913	0.0393278	0.0435594	0.0585862	0.0438361	0.0411037	0.0433722	0.0146455	0.0261601	0.0255157	0.0321698
15.3333	2.46642	2.10288	2.02719	2.19213	1.81141	2.64499	2.81264	2.69921	2.38601	2.57106	2.31761	2.1817	2.49173	2.55593	3.00276	2.69101	2.15761	2.66998	2.24743	1.70817		15.3333	0.0310949	0.0229328	0.0258552	0.0324404	0.0214394	0.0416416	0.0343806	0.033265	0.0429002	0.0416451	0.0330676	0.0400704	0.0507529	0.0426149	0.0352015	0.0389991	0.0143236	0.0216774	0.0260776	0.0276707
15.6667	2.49539	2.13251	2.03169	2.22263	1.81833	2.64671	2.81751	2.70428	2.39841	2.5675	2.32253	2.18796	2.49585	2.57239	3.01048	2.70085	2.16222	2.67866	2.25725	1.71463		15.6667	0.0276446	0.0209631	0.023707	0.0296116	0.0189997	0.0337466	0.0278338	0.028022	0.0398151	0.0314934	0.0263958	0.0358545	0.0430217	0.0416469	0.0294815	0.0341933	0.0139292	0.0179596	0.0243438	0.0233025
16	2.48256	2.11478	2.04568	2.20821	1.82209	2.6579	2.82478	2.71312	2.40886	2.57903	2.32891	2.19889	2.51225	2.5861	3.01708	2.71106	2.16936	2.68155	2.27286	1.72683		16	0.0243765	0.0181726	0.0213117	0.026518	0.0165022	0.0286552	0.0230145	0.0228556	0.0361043	0.0266475	0.0217635	0.032597	0.0384395	0.0383971	0.0248565	0.0304985	0.0129127	0.0146443	0.022109	0.019537
16.3333	2.48302	2.11586	2.05347	2.20976	1.82584	2.63721	2.82842	2.7211	2.43383	2.54564	2.32744	2.20717	2.49951	2.62464	3.02878	2.72773	2.17343	2.68402	2.27043	1.72747		16.3333	0.0187751	0.0129137	0.0195748	0.0205064	0.0135811	0.024066	0.0185239	0.0182582	0.0322813	0.0213581	0.0179654	0.0291128	0.0344207	0.0346437	0.0212563	0.0264803	0.0114667	0.0120312	0.0198819	0.0164811
16.6667	2.50862	2.14372	2.0518	2.24815	1.83519	2.6848	2.83848	2.72613	2.43289	2.61025	2.34696	2.22211	2.54833	2.60369	3.03425	2.73137	2.17394	2.68608	2.27869	1.72939		16.6667	0.0151595	0.0104859	0.0168977	0.0176091	0.0112301	0.0198167	0.0146346	0.0147137	0.0287416	0.0173256	0.0150151	0.0252684	0.0307564	0.0317305	0.0175429	0.0227741	0.00923677	0.00958724	0.0177973	0.0133563
17	2.49311	2.1234	2.064	2.22314	1.83145	2.67672	2.83768	2.72529	2.43804	2.59755	2.34112	2.22519	2.54698	2.62203	3.03934	2.74308	2.17191	2.69019	2.28014	1.73449		17	0.0126763	0.00887784	0.0141775	0.0152593	0.00904829	0.0182623	0.0118458	0.0113322	0.0243734	0.0177401	0.0131072	0.0217495	0.0291506	0.0265722	0.00985078	0.0133336	0.0048794	0.00803247	0.022679	0.00951068
17.3333	2.51498	2.15062	2.06234	2.25473	1.83705	2.66004	2.83768	2.72864	2.45855	2.56039	2.34063	2.23082	2.529	2.64714	3.04225	2.74992	2.17648	2.6906	2.28837	1.7364		17.3333	0.00831725	0.00525886	0.0126474	0.0103648	0.0069803	0.0135316	0.00876132	0.00861981	0.0215055	0.0122061	0.0100862	0.0186009	0.0242043	0.0246379	0.00842317	0.0125944	0.0034372	0.00635268	0.0184421	0.00821189
17.6667	2.49311	2.12393	2.07117	2.22724	1.83394	2.66347	2.83969	2.73115	2.46087	2.56439	2.34112	2.23644	2.53621	2.65446	3.04443	2.74791	2.18206	2.69183	2.2874	1.73958		17.6667	0.00714525	0.00413593	0.0104978	0.00880702	0.00614418	0.0130503	0.0072538	0.00701372	0.0182846	0.0129056	0.00906956	0.0162456	0.0232829	0.0204546	0.00714217	0.0105607	0.00214287	0.0049509	0.0159859	0.00678475
18	2.52042	2.14956	2.06621	2.25726	1.84325	2.69794	2.84731	2.73156	2.4604	2.62464	2.35763	2.2451	2.57593	2.63461	3.04661	2.75434	2.18206	2.69266	2.29368	1.74149		18	0.00632538	0.00348284	0.00886489	0.00711867	0.00488802	0.00950709	0.00559069	0.00559617	0.0161757	0.00812497	0.00739427	0.0137765	0.0191669	0.0187524	0.00568293	0.00841377	0.00114412	0.00423079	0.0137961	0.00563664
18.3333	2.49996	2.12876	2.07613	2.23031	1.83643	2.66732	2.8429	2.7324	2.47104	2.5675	2.34696	2.2451	2.54833	2.66732	3.04915	2.75193	2.18358	2.69512	2.30137	1.74403		18.3333	0.00579604	0.0033226	0.00764418	0.00600631	0.00440894	0.0105462	0.00450721	0.00476288	0.0132794	0.0109101	0.00711899	0.0119247	0.0193604	0.0147923	0.00458059	0.00704429	0.000893326	0.00380871	0.0136145	0.00550552
18.6667	2.52223	2.15115	2.07062	2.2608	1.84449	2.70301	2.84972	2.73699	2.46781	2.62811	2.3615	2.25321	2.58698	2.64671	3.04806	2.75394	2.17953	2.69512	2.30233	1.74403		18.6667	0.00296935	0.00032587	0.00727167	0.00199894	0.00330102	0.00744748	0.00338574	0.00420289	0.0121178	0.00725712	0.0056676	0.00993366	0.0157227	0.0148122	0.00419819	0.00631726	0.000468207	0.0034346	0.0130006	0.00491485
19	2.50452	2.12662	2.07777	2.23695	1.83829	2.69414	2.84771	2.73532	2.47058	2.61287	2.35715	2.25017	2.57992	2.65446	3.00276	2.69471	2.15812	2.70167	2.37651	1.73258		19	0.00277939	0.000304088	0.00609858	0.00250134	0.00292356	0.00646266	0.00287664	0.00426952	0.0108681	0.00566309	0.00550148	0.00891552	0.014278	0.0135649	0.00390227	0.00573643	0.000553146	0.00300706	0.0128882	0.00435562
19.3333	2.50407	2.12823	2.08271	2.23593	1.84201	2.69498	2.84891	2.73615	2.47243	2.61375	2.3557	2.25321	2.58478	2.65918	3.05856	2.77433	2.17953	2.69799	2.2932	1.75161		19.3333	0.000529695	-0.00189529	0.00613842	-0.00021716	0.00223734	0.00886361	0.00283497	0.00397816	0.0086693	0.00942521	0.00579706	0.00827024	0.0156996	0.0109137	0.00393669	0.00525107	-7.31894e-05	0.00287785	0.0115984	0.00388389
19.6667	2.52539	2.15062	2.07667	2.2613	1.8482	2.69752	2.84891	2.73824	2.47704	2.61462	2.36005	2.25372	2.58963	2.6639	3.05458	2.76195	2.178	2.69676	2.31144	1.74782		19.6667	0.00305707	0.00136394	0.00506588	0.00263705	0.00270435	0.00706355	0.00215325	0.00350307	0.00783021	0.00639261	0.00523224	0.00708255	0.0130741	0.0109184	0.00394217	0.00598894	-0.000322337	0.00259334	0.011028	0.00348562
20	2.50498	2.12876	2.0849	2.23593	1.84201	2.6733	2.84771	2.74074	2.48899	2.57061	2.35473	2.25726	2.56884	2.68778	3.05241	2.76115	2.17902	2.69799	2.31335	1.74972		20	0.00051586	-0.000675994	0.004956	0.000240544	0.00188668	0.00506888	0.00143903	0.00300814	0.00702915	0.00285656	0.00443493	0.00611535	0.0103232	0.0114477	0.00436553	0.00609234	0.000105677	0.00217416	0.0101411	0.00331785
20.3333	2.52449	2.1538	2.08161	2.2608	1.84943	2.71102	2.85012	2.7424	2.48394	2.63418	2.36681	2.26231	2.60544	2.66818	3.0553	2.76715	2.18105	2.70085	2.32479	1.75161		20.3333	0.0031691	0.00257227	0.00365968	0.00315875	0.00268091	0.00381145	0.00134021	0.00267755	0.00644304	0.00107088	0.00437291	0.00588614	0.00874864	0.0110695	0.00468213	0.00612581	0.000550352	0.00168758	0.00932103	0.00295328
20.6667	2.50771	2.13037	2.08709	2.23848	1.84325	2.70217	2.84972	2.74074	2.48486	2.61724	2.36295	2.26181	2.59711	2.67714	3.0553	2.76355	2.17648	2.70167	2.33191	1.75035		20.6667	0.0010069	0.000817146	0.00362274	0.000655389	0.00197646	-0.000720481	0.000448564	0.0020659	0.00668131	-0.0067159	0.00319868	0.00539782	0.0036464	0.0132336	0.00524368	0.00573604	0.0011451	0.00145778	0.0083158	0.00271453
21	2.50862	2.13037	2.08654	2.24408	1.84263	2.67885	2.84771	2.74448	2.49357	2.5746	2.35908	2.26332	2.57859	2.69752	3.05422	2.76675	2.18155	2.70167	2.33759	1.75225		21	0.00379287	0.00400398	0.0025091	0.00408671	0.00244508	0.0023376	0.000818036	0.00201764	0.00542879	-0.00123859	0.00465029	0.00566118	0.00609567	0.0105767	0.0056557	0.00539949	0.00164015	0.00105929	0.00742762	0.00216337
21.3333	2.50589	2.12983	2.09036	2.24001	1.84511	2.72152	2.85492	2.7449	2.48807	2.63764	2.37259	2.27036	2.61418	2.67757	3.05494	2.75995	2.178	2.70249	2.3338	1.75098		21.3333	0.00189551	0.00184356	0.00258769	0.00219917	0.00164969	0.00309631	0.000699303	0.00119401	0.0041622	0.000477312	0.00486335	0.00473635	0.00629693	0.00854943	0.000566505	-0.00175179	-0.000778021	0.00125502	0.0142913	0.000572248
21.6667	2.53081	2.15433	2.08545	2.26231	1.85251	2.70597	2.85132	2.7424	2.48623	2.61898	2.3697	2.26584	2.60544	2.68438	3.05386	2.76715	2.1775	2.70249	2.34042	1.75225		21.6667	-0.000384517	-0.00012257	0.00323459	9.31631e-05	0.00113047	0.00361191	0.00054108	0.000466534	0.00240495	0.00184842	0.00469387	0.00395379	0.00651571	0.00669242	0.0010553	-0.00108823	-0.00134786	0.000978419	0.0117571	0.000769968
22	2.50771	2.13251	2.08873	2.24256	1.84573	2.70765	2.85092	2.74157	2.48853	2.61898	2.37162	2.26735	2.6085	2.68735	3.05747	2.76595	2.178	2.70167	2.34703	1.75351		22	0.00241635	0.00293078	0.0023045	0.00304901	0.00190353	0.00414911	0.000363057	-0.000144043	0.00106544	0.0033346	0.0047721	0.00315399	0.00704689	0.00491498	0.00106726	-0.00111428	-0.00205165	0.000458792	0.01088	0.000634259
22.3333	2.53081	2.15751	2.08545	2.26382	1.85313	2.68225	2.85012	2.74448	2.49585	2.57549	2.36488	2.26986	2.5861	2.70681	3.05603	2.76075	2.1775	2.70167	2.35032	1.75161		22.3333	0.000197427	0.000798609	0.00258297	0.000800969	0.00119097	0.00179454	0.000145328	-0.000548661	0.000998106	-0.000278341	0.00394234	0.00241388	0.00441469	0.00535925	0.000858408	-0.00180687	-0.00285719	0.000128121	0.00881801	0.000737864
22.6667	2.50771	2.13251	2.08982	2.24154	1.84758	2.68225	2.84771	2.74282	2.49768	2.57328	2.36729	2.27137	2.58434	2.70639	3.05711	2.76035	2.17648	2.7029	2.34891	1.75161		22.6667	0.000251975	0.00147648	0.00236519	0.001497	0.00142567	0.0030313	0.000185018	-0.000960308	0.000151948	0.00243763	0.00403024	0.00197407	0.00556062	0.00323513	0.00103714	-0.00139146	-0.00337055	0.000256096	0.00776728	0.000592421
23	2.53306	2.15698	2.08763	2.26785	1.8519	2.71984	2.85332	2.7449	2.49082	2.63764	2.38027	2.27388	2.62159	2.6882	3.0582	2.75995	2.17902	2.70249	2.35689	1.74972		23	-0.00129275	-0.000427947	0.00265254	1.93804e-05	0.00094738	0.00313547	0.00011256	-0.00128944	-0.000747037	0.00388754	0.00345884	0.00103669	0.00551457	0.00179426	0.000935863	-0.00152987	-0.00479983	0.000134755	0.00693167	0.000363706
23.3333	2.50816	2.13251	2.09418	2.24306	1.84758	2.70976	2.85132	2.74032	2.49128	2.61898	2.37595	2.26886	2.61287	2.69244	3.05711	2.76115	2.17445	2.70208	2.35783	1.75351		23.3333	-0.00290509	-0.00245593	0.00260735	-0.00100492	0.000112681	0.00048599	-0.000217341	-0.00134447	-0.00063367	0.00025314	0.00236158	0.000522233	0.00302175	0.00240368	0.000751043	-0.0010617	-0.00523998	0.000296484	0.0068634	0.000322241
23.6667	2.50543	2.13358	2.0969	2.24306	1.84758	2.70892	2.85012	2.74115	2.48761	2.61549	2.37691	2.26986	2.61287	2.69498	3.05747	2.75835	2.17089	2.70167	2.35689	1.75288		23.6667	-0.00477994	-0.00454571	0.00301196	-0.00269155	-0.000456919	0.00214667	0.000105653	-0.00137914	-0.00105635	0.00339829	0.00246519	0.000190757	0.00398429	0.000787676	0.000447084	-0.0012726	-0.00597359	0.000262813	0.00600119	0.000135164
24	2.53216	2.15909	2.09036	2.26584	1.85436	2.70849	2.85012	2.74074	2.48899	2.61593	2.37787	2.27187	2.61506	2.69625	3.05711	2.76315	2.16987	2.70126	2.36298	1.75414		24	-0.00395248	-0.00371149	0.00251707	-0.00173831	-0.000161956	0.00242188	0.000250818	-0.00166065	-0.0018193	0.0045608	0.00215651	-9.94341e-05	0.003974	-0.000594932	-0.00029223	-0.000857539	-0.00661556	0.000154965	0.00476748	-0.000114351
24.3333	2.50634	2.13358	2.09527	2.24357	1.84758	2.70934	2.85132	2.74032	2.4899	2.61593	2.37787	2.27137	2.61156	2.69625	3.05783	2.75755	2.1663	2.70249	2.35736	1.7554		24.3333	-0.00296447	-0.00270141	0.00164546	-0.000855601	-0.000162408	0.00248118	0.00026407	-0.00202456	-0.00236302	0.00565851	0.00194318	-0.000555099	0.00399295	-0.00178133	-0.000357744	-0.000237619	-0.00763378	9.43232e-05	0.00437804	9.72571e-08
24.6667	2.5068	2.13358	2.09581	2.24561	1.84943	2.70765	2.85172	2.73824	2.48807	2.61331	2.37691	2.27087	2.61418	2.69456	3.05928	2.76115	2.16477	2.70453	2.36158	1.75161		24.6667	-0.00188225	-0.00165079	0.000979633	-6.23125e-05	2.04489e-05	-0.00276198	-0.000131849	-0.00191514	-0.00142684	-0.00213416	0.0001912	-0.000596352	-0.000547561	0.000850191	-0.000709408	-0.000481971	-0.00890235	-6.07109e-05	0.00267849	-0.000332678
25	2.50725	2.13144	2.0969	2.24713	1.84943	2.70597	2.85132	2.74032	2.48715	2.6168	2.37643	2.26785	2.61331	2.69541	3.05711	2.75875	2.15812	2.70167	2.36158	1.75225		25	-0.0032195	-0.00318743	0.000548595	-0.00182509	-0.000284457	-0.00786473	-0.000844664	-0.0018604	-0.000211877	-0.0103726	-0.00152074	-0.000571383	-0.00561868	0.00316927	-0.00109103	-0.000706482	-0.0091956	-0.000276544	0.00158056	-0.000509333
25.3333	2.50543	2.13037	2.09581	2.24662	1.84758	2.70597	2.85132	2.73866	2.48761	2.61506	2.37787	2.27137	2.61287	2.69541	3.05783	2.76035	2.15915	2.70453	2.36766	1.75225		25.3333	-0.00187251	-0.00214838	6.27705e-05	-0.000602166	-0.000162429	-0.00883386	-0.000858095	-0.00145593	0.00039996	-0.0111985	-0.00176712	-0.000223655	-0.00644194	0.00352857	-0.00149089	-0.00171195	-0.0101402	-0.000323694	0.00195714	-0.00108151
25.6667	2.50543	2.13037	2.09745	2.2451	1.8482	2.70428	2.85012	2.73741	2.48761	2.6168	2.37739	2.26634	2.612	2.69583	3.05639	2.76035	2.15659	2.70208	2.36906	1.75225		25.6667	-0.000829626	-0.000610067	-0.000467082	0.000706305	0.000203157	-0.00668518	-0.000567741	-0.00135288	0.000263704	-0.00700875	-0.00133154	-0.00013252	-0.00480263	0.00163771	-0.00163989	-0.00211539	-0.0110915	-0.000397808	0.000962573	-0.000831863
26	2.50361	2.13144	2.09527	2.24662	1.84881	2.70554	2.85172	2.73657	2.48623	2.61506	2.37739	2.27137	2.612	2.69329	3.05349	2.75835	2.15453	2.70126	2.36345	1.75035		26	-0.00232657	-0.00182091	-0.000188537	-0.000872256	-0.000152519	-0.00823262	-0.000897729	-0.00122254	0.000399841	-0.00977859	-0.00193383	-0.000273265	-0.00643882	0.00224443	-0.0017532	-0.00236604	-0.012112	-0.000708042	0.000684916	-0.000519894
26.3333	2.52765	2.15486	2.08927	2.26634	1.85313	2.70132	2.85092	2.73574	2.48578	2.61375	2.37739	2.26886	2.60981	2.69329	3.05603	2.76035	2.14631	2.70249	2.36812	1.75225		26.3333	-0.00114677	6.23468e-05	-0.000520918	8.87585e-06	8.07042e-05	-0.00923463	-0.00113527	-0.00117471	0.000687103	-0.0116778	-0.00233035	-1.64085e-05	-0.00761491	0.00263591	-0.001968	-0.00232053	-0.0121689	-0.00106551	0.000161288	-0.000207924
26.6667	2.50498	2.12983	2.09527	2.24459	1.84758	2.67629	2.84771	2.73615	2.49173	2.57372	2.37066	2.27036	2.59007	2.71018	3.05458	2.75675	2.13909	2.70167	2.35455	1.74972		26.6667	5.34867e-05	0.00188291	-0.00102411	0.00156797	0.000456477	-0.00972126	-0.0014656	-0.000948114	0.000906449	-0.0126252	-0.00251278	0.000257032	-0.00868765	0.00275599	-0.00210548	-0.0027302	-0.0117195	-0.00103845	-0.000894952	0.000332524
27	2.50316	2.12823	2.09418	2.24154	1.8482	2.67672	2.84691	2.73615	2.49173	2.5715	2.36922	2.26936	2.58742	2.70807	3.05277	2.75675	2.14373	2.69962	2.36298	1.75098		27	-0.00106271	0.00107686	-0.000449512	0.000165367	1.91197e-05	-0.00985767	-0.00155819	-0.00113383	0.000823585	-0.0132595	-0.00269511	0.000132702	-0.00873984	0.00247187	-0.00187326	-0.00286318	-0.0112825	-0.000991502	-0.00112528	0.00059239
27.3333	2.49996	2.12501	2.0969	2.24103	1.84758	2.67373	2.84731	2.73615	2.49265	2.57106	2.36922	2.26936	2.58742	2.70976	3.0506	2.74872	2.12873	2.70126	2.37092	1.74909		27.3333	-0.00183304	-2.73898e-06	-0.00022476	-0.000952398	-0.000346975	-0.00944642	-0.00178966	-0.000955496	0.000574431	-0.012985	-0.00282987	-0.000231903	-0.0086047	0.00210433	-0.00156901	-0.00295576	-0.011079	-0.00109264	-0.00170279	0.000873092
27.6667	2.52042	2.15327	2.09036	2.26634	1.85436	2.70934	2.85172	2.73699	2.48486	2.63245	2.37931	2.27187	2.6168	2.68565	3.05313	2.75153	2.12561	2.70126	2.3583	1.75288		27.6667	-0.00271587	-0.00130323	-2.68546e-05	-0.00184347	-0.000794308	-0.00846865	-0.00184935	-0.000694381	0.000491513	-0.0120919	-0.00269552	-0.000140746	-0.0080788	0.00170183	-0.00113962	-0.00284386	-0.0102476	-0.000661117	-0.00154831	0.000862884
28	2.49996	2.12769	2.09473	2.24103	1.8482	2.67288	2.84691	2.73574	2.49082	2.56839	2.36826	2.26886	2.58434	2.70681	3.05241	2.75474	2.12093	2.69921	2.36672	1.75414		28	-0.00384004	-0.0025861	0.000269602	-0.00301134	-0.00138455	-0.00376151	-0.00144635	-0.00072887	-0.00040079	-0.0046841	-0.00129282	-8.32062e-05	-0.00398847	-0.000753139	-0.00103249	-0.00258655	-0.00900429	-0.000492449	-0.000499829	0.000665427
28.3333	2.49494	2.12823	2.09581	2.23899	1.84634	2.67288	2.84731	2.73449	2.49128	2.56884	2.36777	2.27036	2.58169	2.70512	3.05096	2.75153	2.12353	2.69881	2.35877	1.75288		28.3333	-0.00287699	-0.00150053	-0.00027005	-0.00128847	-0.000967051	-0.0023712	-0.00138736	-0.000666981	-0.000725461	-0.00332024	-0.0011427	-0.000108079	-0.00311489	-0.00166365	-0.00118178	-0.00252763	-0.007126	-0.000512674	-0.00087738	0.000343159
28.6667	2.51906	2.15221	2.08927	2.26735	1.85436	2.67117	2.84451	2.73574	2.4899	2.57061	2.36826	2.27087	2.58124	2.70386	3.04987	2.75153	2.12509	2.70085	2.35924	1.75351		28.6667	-0.00145972	7.08816e-05	-0.000934848	0.000256857	-0.000896336	0.00279792	-0.000799525	-0.000708209	-0.00191292	0.00429031	0.000434496	0.000231366	0.00104338	-0.00427851	-0.000823826	-0.00193297	-0.00570288	-0.000114694	0.000540828	0.000291359
29	2.49722	2.12876	2.09853	2.23899	1.84511	2.67032	2.84531	2.73323	2.48899	2.56928	2.36777	2.26735	2.58345	2.70301	3.0506	2.74912	2.11989	2.6984	2.36298	1.75477		29	-0.00211149	-0.000744789	-0.000620083	-0.000827469	-0.000885449	0.003463	-0.00100438	-0.00100418	-0.00246594	0.00573564	0.000554424	0.000115509	0.00192686	-0.00466441	-0.000722548	-0.00187433	-0.0040673	8.09712e-05	0.000561947	-0.000166226
29.3333	2.49859	2.12769	2.09418	2.23899	1.84511	2.6716	2.8433	2.73365	2.48853	2.56706	2.36729	2.26785	2.58124	2.70259	3.05241	2.75032	2.1178	2.69921	2.35971	1.75477		29.3333	-0.00298152	-0.00177248	-0.000745481	-0.00195326	-0.00111901	0.00184289	-0.00157982	-0.000880349	-0.00190614	0.00175071	0.000158572	-3.34535e-05	0.000253955	-0.00316466	-0.000949759	-0.00134503	-0.00199145	6.07642e-05	0.00137856	0.000197089
29.6667	2.49814	2.12608	2.09473	2.24052	1.84573	2.6716	2.8437	2.73532	2.4899	2.56706	2.36681	2.26835	2.58036	2.70344	3.05205	2.74912	2.11623	2.70085	2.35971	1.75225		29.6667	-0.00413731	-0.00342807	-0.00029616	-0.00336462	-0.00131176	0.00310407	-0.00150687	-0.00088727	-0.00227847	0.00391648	0.000919302	-2.49805e-05	0.00185806	-0.00326561	-0.00114681	-0.00175583	-0.0013999	0.000377826	0.0033333	-0.000198043
30	2.49448	2.12554	2.09364	2.23848	1.84325	2.70554	2.84851	2.73323	2.4821	2.6229	2.37835	2.27338	2.612	2.68353	3.04951	2.74872	2.11623	2.70044	2.36579	1.75035		30	-0.00320543	-0.00182208	-0.000493624	-0.00220042	-0.000752767	0.00709926	-0.000952232	-0.000942637	-0.0035737	0.0105759	0.00210048	-0.000141144	0.00534904	-0.00521155	-0.000764607	-0.001484	-0.000833098	0.000843169	0.0037091	-0.000405791
30.3333	2.51588	2.14744	2.08709	2.26483	1.8519	2.67074	2.8429	2.73449	2.48853	2.56484	2.36585	2.26785	2.57947	2.70006	3.04915	2.74711	2.11832	2.69921	2.35736	1.75098		30.3333	-0.00386605	-0.00248989	-0.000466362	-0.00316101	-0.000874708	0.0048536	-0.00144899	-0.000867	-0.00305858	0.00631321	0.00171267	-0.00066345	0.00338477	-0.00330042	-0.000645183	-0.000967566	-0.000910257	0.00107235	0.0046413	-0.000187357
30.6667	2.49448	2.12769	2.09146	2.24306	1.84387	2.70807	2.84771	2.73407	2.48072	2.62116	2.37835	2.27388	2.60981	2.68395	3.0506	2.74831	2.11728	2.70167	2.36906	1.75161		30.6667	-0.00264021	-0.00129113	-0.000646428	-0.00161403	-0.00040626	0.0024108	-0.00201263	-0.000997778	-0.00243019	0.00202815	0.00147542	-0.000995208	0.00107811	-0.00131967	-0.00092016	-0.00102755	-0.00042037	0.00105206	0.00449459	-0.000291104
31	2.49448	2.12823	2.09473	2.23797	1.8482	2.69286	2.8429	2.73073	2.47934	2.60675	2.37162	2.26835	2.59974	2.68523	3.04879	2.74509	2.12301	2.70044	2.37092	1.75035		31	-0.0011416	0.000491888	-0.000969812	0.0002039	0.000295167	0.0035968	-0.00180706	-0.000880909	-0.00270403	0.00392538	0.0020689	-0.00072142	0.00205607	-0.00116534	-0.000949925	-0.000576863	0.000163528	0.00140263	0.00397893	0.000197208
31.3333	2.49265	2.12769	2.09146	2.24001	1.84511	2.67202	2.83929	2.73407	2.48853	2.55994	2.36826	2.26886	2.57859	2.70259	3.04661	2.74791	2.11936	2.70044	2.37185	1.75728		31.3333	-0.00183277	-0.000265883	-0.00034129	-0.000992965	-4.07693e-05	0.00286486	-0.00183993	-0.00130793	-0.00325184	0.00326576	0.00206105	-0.00131847	0.00172778	-0.000479865	-0.000985727	-7.97864e-05	0.00134793	0.00136194	0.0041556	0.000529937
31.6667	2.49173	2.12501	2.09364	2.23746	1.84573	2.70386	2.84411	2.7324	2.4775	2.62072	2.37979	2.27036	2.61025	2.68353	3.04842	2.7463	2.1178	2.70208	2.37558	1.75288		31.6667	-0.00241898	-0.00111206	-0.000116414	-0.00195426	-0.000295129	0.00165086	-0.00196522	-0.00167999	-0.00351115	0.00152975	0.00192604	-0.00179936	0.00105693	0.000414987	-0.000657191	0.000278216	0.00163167	0.00123376	0.00369294	0.000997637
32	2.48761	2.12501	2.09418	2.23338	1.84511	2.69498	2.8433	2.73031	2.47474	2.60281	2.37403	2.26634	2.59886	2.68862	3.05096	2.74952	2.11936	2.70371	2.37511	1.75098		32	-0.00260484	-0.00185177	0.000252181	-0.00237774	-0.000590351	-0.00249523	-0.00238229	-0.00162518	-0.00223798	-0.00465037	0.00107041	-0.00200634	-0.0021333	0.00327279	-0.000239019	0.000397648	0.0020002	0.00130117	0.00287661	0.00110177
32.3333	2.4899	2.12715	2.092	2.23593	1.84387	2.67202	2.83688	2.73198	2.4844	2.56217	2.37018	2.26483	2.57859	2.70344	3.04879	2.74791	2.11728	2.70412	2.37372	1.75351		32.3333	-0.00312972	-0.00279507	0.000414153	-0.00305317	-0.00125274	0.000951874	-0.00147593	-0.00169406	-0.00274595	0.00154354	0.00218665	-0.00123544	0.00150759	0.00208699	-0.000322676	0.000609884	0.00254783	0.00150308	0.00288364	0.000945877
32.6667	2.51316	2.14531	2.08818	2.26281	1.85128	2.66989	2.83406	2.73073	2.48394	2.56039	2.37259	2.26433	2.57726	2.70554	3.04588	2.74469	2.11936	2.7029	2.37325	1.75161		32.6667	-0.0015176	-0.0013362	-0.000206567	-0.000478468	-0.000591183	-0.00320853	-0.00162804	-0.00161858	-0.0014419	-0.00506328	0.00109297	-0.00157548	-0.00203996	0.00455328	-8.36178e-05	0.000908046	0.00350616	0.00153623	0.00171128	0.000914609
33	2.49082	2.12608	2.09309	2.23644	1.84511	2.70807	2.8429	2.73115	2.4752	2.61941	2.38123	2.26886	2.61025	2.68862	3.04879	2.74872	2.1178	2.70494	2.37139	1.75666		33	-0.00183351	-0.00152047	-0.000449187	-0.000258074	-0.000438306	0.000642276	-0.000609038	-0.00159832	-0.00188174	0.00116908	0.0022005	-0.000746704	0.0016012	0.0031031	0.000197247	0.000589836	0.00371121	0.00159008	0.00158775	0.000810784
33.3333	2.48944	2.1234	2.09255	2.23389	1.84387	2.69583	2.83929	2.7278	2.47104	2.60325	2.37787	2.26382	2.5993	2.69244	3.0477	2.75153	2.12873	2.70453	2.37604	1.75414		33.3333	-0.00201349	-0.00168723	-0.000359426	-0.00053289	-0.000346636	0.00166498	-0.000370473	-0.00187399	-0.00247351	0.00388181	0.00192387	-0.000746643	0.00296999	0.00212018	0.000400452	0.000112485	0.00470507	0.0015022	0.00142637	0.000436674
33.6667	2.48761	2.12286	2.09255	2.23542	1.84449	2.69371	2.83969	2.72697	2.47151	2.60062	2.37883	2.26382	2.60106	2.69329	3.04879	2.74912	2.12353	2.70371	2.37558	1.7554		33.6667	-0.00272298	-0.00156179	-0.000359325	-0.000463283	-0.000407496	-0.00237658	-0.000681528	-0.00159874	-0.000812757	-0.00275518	0.000767699	-0.000622171	-0.000561415	0.00460427	0.000292856	0.000728397	0.00533711	0.00134015	0.00125745	0.000914199
34	2.49036	2.12501	2.09309	2.23848	1.84325	2.66775	2.83567	2.72822	2.48256	2.56128	2.37403	2.26533	2.57992	2.7106	3.04951	2.74791	2.12717	2.70453	2.37465	1.75477		34	-0.00303858	-0.00171052	-0.000503367	-0.000410598	-0.000386829	-0.00273809	-0.000357153	-0.00143356	-0.00030332	-0.0023643	0.000886772	-0.000199195	-0.000366635	0.00481184	0.000269013	0.000251279	0.00559124	0.00108415	0.00160242	0.00090383
34.3333	2.4899	2.1234	2.092	2.23797	1.84201	2.70428	2.8421	2.72822	2.47243	2.62029	2.38171	2.26886	2.612	2.69414	3.04697	2.74912	2.13081	2.70698	2.37837	1.75477		34.3333	-0.00403475	-0.00224002	-0.000233674	-0.00129098	-0.000355947	0.000205833	0.000464004	-0.00128185	-0.00131311	0.00301747	0.00136863	0.000398096	0.00239511	0.00289787	0.000884216	0.000893888	0.00593895	0.000949502	0.0016869	0.000685399
34.6667	2.48578	2.12178	2.09146	2.24001	1.84511	2.66775	2.83688	2.72738	2.48164	2.55816	2.37451	2.26332	2.57726	2.71354	3.05023	2.75193	2.13495	2.7078	2.37837	1.75603		34.6667	-0.00430457	-0.00230924	-0.000440554	-0.00163327	-0.000528969	-0.000886927	0.000404536	-0.00113745	-0.00117002	0.00168148	0.000616686	0.000307008	0.00143346	0.00300597	0.00111125	0.00131116	0.00594176	0.000983133	0.00169443	0.000851175
35	2.48623	2.12393	2.09091	2.23746	1.8482	2.7047	2.8421	2.72613	2.47197	2.62116	2.38362	2.26735	2.61418	2.69498	3.04915	2.74509	2.13133	2.70657	2.37883	1.7554		35	-0.00208752	-0.00038081	-0.000656538	0.000857392	0.00026513	-0.00261162	-7.9269e-05	-0.000937652	-0.00096648	-0.000768223	7.65234e-06	4.15665e-05	-8.78489e-05	0.00329479	0.00106314	0.0014427	0.00585123	0.000693524	0.00154858	0.000777802
35.3333	2.48623	2.12286	2.09036	2.23746	1.84325	2.69329	2.83889	2.72571	2.47058	2.60237	2.37835	2.26433	2.60369	2.70006	3.05023	2.7467	2.13495	2.70739	2.3779	1.75477		35.3333	-0.00194415	-0.000177205	-0.000755593	0.000714645	0.000621829	-0.00261303	0.000159083	-0.000565542	-1.59333e-06	-0.0010706	-0.000269483	0.000738471	-0.00075738	0.00344946	0.00130792	0.00152244	0.00561962	0.000700246	0.00126404	0.00103718
35.6667	2.48164	2.12554	2.09255	2.23848	1.84449	2.66647	2.83688	2.72655	2.48118	2.56172	2.37451	2.26433	2.57947	2.71733	3.04987	2.75474	2.13754	2.7078	2.3779	1.75603		35.6667	-0.00186871	-0.00023027	-0.000845595	0.000403407	0.000733964	0.000455155	0.000814251	-0.000289692	-0.000418473	0.00373911	0.000205146	0.00119401	0.00141064	0.00187858	0.00131376	0.00188702	0.00648414	0.000612697	0.00116445	0.00110954
36	2.48486	2.12554	2.08873	2.24103	1.84449	2.66561	2.83728	2.72613	2.48118	2.56217	2.37499	2.26483	2.58036	2.71901	3.04915	2.7467	2.13857	2.70617	2.37976	1.75603		36	-0.00206573	-0.000442813	-0.0006027	0.000428187	0.00104971	0.00205951	0.00109254	-0.000241373	-0.00121549	0.00591668	0.000142496	0.00120226	0.00233147	0.000370362	0.00157027	0.00173514	0.00634888	0.000255838	0.000857994	0.00136852
36.3333	2.48164	2.12178	2.09146	2.23695	1.84511	2.70301	2.8421	2.72738	2.46966	2.62377	2.38458	2.27036	2.61462	2.69752	3.05277	2.75434	2.14116	2.70617	2.37837	1.75666		36.3333	-0.00182427	-0.000336542	-0.000494841	0.000445077	0.000968201	0.000640433	0.000900276	7.58396e-05	-0.000691371	0.00353299	-0.000347542	0.00128535	0.000979276	0.000901045	0.00183875	0.00234934	0.00711048	0.000148014	0.000666053	0.00128555
36.6667	2.48532	2.1234	2.08873	2.24001	1.84449	2.69032	2.84049	2.72487	2.4692	2.60675	2.37835	2.26584	2.60325	2.70217	3.05168	2.75474	2.14373	2.7078	2.37976	1.75854		36.6667	-0.00183342	-0.000744403	-0.000179991	0.000436732	0.000865838	0.00290348	0.00121163	0.000475757	-0.00111598	0.00723007	-6.25784e-05	0.00199832	0.00290098	-0.000259675	0.00153401	0.00232317	0.00836137	0.000215312	0.000375058	0.00114035
37	2.48256	2.12178	2.09255	2.23797	1.84573	2.68947	2.84009	2.72571	2.46781	2.605	2.37835	2.26483	2.60325	2.70132	3.05277	2.75675	2.14477	2.70657	2.37976	1.75917		37	-0.001917	-0.00115203	-8.99485e-05	0.00062997	0.00100841	-0.00110607	0.000569316	0.000972022	0.000932999	-0.000365956	-0.00105948	0.00225411	-0.00138572	0.00239681	0.00152806	0.00250902	0.00980752	0.000356631	0.000283226	0.00107823
37.3333	2.48256	2.12286	2.08873	2.23797	1.84758	2.66561	2.83808	2.72613	2.48302	2.56528	2.37259	2.26936	2.5777	2.71901	3.05349	2.75354	2.1494	2.7078	2.38162	1.75791		37.3333	-0.00187194	-0.0011165	-4.48686e-05	0.000680267	0.00138528	0.00300323	0.00134349	0.00130275	0.000873365	0.00558371	3.13686e-05	0.00312278	0.00168931	0.000813067	0.0015099	0.00187961	0.010159	0.000269165	9.18258e-05	0.00102627
37.6667	2.4821	2.12286	2.08873	2.2395	1.84696	2.70386	2.84571	2.72822	2.4752	2.62681	2.38266	2.27288	2.61375	2.70217	3.05313	2.75394	2.15299	2.7078	2.37976	1.75917		37.6667	-0.00164496	-0.00100114	-5.37606e-05	0.000814348	0.00125261	0.00458435	0.00131718	0.00141297	0.00038049	0.00716189	6.35795e-05	0.0031057	0.00296181	-2.57459e-05	0.0013249	0.00156759	0.010503	0.000343196	-0.00014553	0.000891195
38	2.48026	2.12178	2.09146	2.24205	1.84881	2.69286	2.8425	2.72697	2.47151	2.60719	2.37691	2.26986	2.6015	2.70344	3.0553	2.75193	2.15299	2.70657	2.37883	1.76043		38	-0.00172813	-0.00105484	0.000350991	0.000772425	0.00129306	0.000300791	0.000754506	0.00182614	0.00220905	-0.000238082	-0.000996959	0.00310463	-0.000611291	0.00289126	0.00113978	0.0022482	0.0106369	0.000531585	-0.000436511	0.000808131
38.3333	2.48026	2.12232	2.08927	2.2395	1.84696	2.69244	2.8429	2.72822	2.47197	2.60807	2.37787	2.26986	2.60325	2.70554	3.05567	2.76155	2.16273	2.70862	2.38162	1.75854		38.3333	-0.00144782	-0.000346136	5.4101e-05	0.00128429	0.0015466	-0.000114676	0.000575563	0.00228022	0.00288615	-0.00123376	-0.000704388	0.00344128	-0.00102233	0.00416295	0.00103184	0.00183651	0.0106997	0.000309523	-0.000513054	0.000403986
38.6667	2.47658	2.11855	2.092	2.24001	1.84881	2.69117	2.8417	2.72906	2.47243	2.6085	2.37739	2.27288	2.60281	2.70681	3.05386	2.75594	2.16936	2.70821	2.37744	1.75854		38.6667	-0.00148561	-0.000425765	0.000171113	0.00102393	0.00148536	-0.000691057	0.00035734	0.00243189	0.00334751	-0.0027291	-0.000531383	0.00368165	-0.00113412	0.00519435	0.00127018	0.00189606	0.0106108	0.000316173	-0.000903724	0.000289892
39	2.47842	2.11963	2.09036	2.24001	1.84881	2.66818	2.83808	2.73115	2.48669	2.56484	2.37211	2.27538	2.57903	2.72487	3.05422	2.75594	2.17292	2.70821	2.3793	1.75854		39	-0.00113733	-3.57407e-05	0.000153068	0.00114148	0.00156577	0.00163236	0.000549252	0.00232811	0.00259633	0.00123939	0.00040943	0.00381984	0.00120308	0.0041911	0.00125205	0.0019028	0.00997	0.000255646	-0.00086535	0.000269209
39.3333	2.47796	2.12125	2.09036	2.24154	1.8482	2.70723	2.84651	2.73156	2.4775	2.62941	2.38218	2.27889	2.61069	2.70554	3.05603	2.75634	2.17241	2.70739	2.3779	1.7598		39.3333	-0.00106931	-4.44388e-05	0.000791323	0.000981908	0.00139268	-9.09426e-05	-5.95386e-05	0.00233439	0.00234351	-0.0016907	0.000149062	0.00325575	0.000324356	0.00511231	0.00135912	0.00220678	0.0091668	0.000141262	-0.000987915	0.000610618
39.6667	2.47842	2.12286	2.09036	2.24306	1.84881	2.69541	2.8429	2.73073	2.47566	2.6085	2.37739	2.27538	2.60413	2.70892	3.05422	2.75955	2.17496	2.70821	2.37837	1.76043		39.6667	-0.000811585	0.000292446	0.000791215	0.000696461	0.00146375	-0.000498607	-0.000119397	0.00222368	0.00279985	-0.00211986	0.000290917	0.00310612	0.000153961	0.00582321	0.00104914	0.00177746	0.00827503	0.000141283	-0.000612716	0.000558806
40	2.47934	2.11802	2.092	2.24103	1.85005	2.66775	2.84049	2.73365	2.48761	2.56617	2.37066	2.27739	2.58345	2.72822	3.0553	2.76235	2.17648	2.70902	2.3779	1.76043		40	-0.000842494	0.000407809	0.000880817	0.000721471	0.00138224	-0.000910726	-0.000106264	0.00215469	0.00317885	-0.00355789	0.000742173	0.00310618	0.00022721	0.00696845	0.000667565	0.00130191	0.00729311	0.000295978	-0.00058974	0.000538178
40.3333	2.47888	2.12447	2.08927	2.24408	1.85313	2.70807	2.84451	2.73574	2.47704	2.63115	2.38314	2.28239	2.61506	2.71144	3.05783	2.76195	2.18105	2.70698	2.3779	1.75791		40.3333	-0.000637606	0.000638369	0.000755058	0.00106526	0.00136202	0.00161618	0.000317222	0.0019476	0.00220062	0.000370848	0.00142202	0.00281585	0.00294238	0.00562753	0.000858289	0.000785998	0.00619806	0.000114322	-0.000582019	0.000827959
40.6667	2.47842	2.12071	2.09036	2.24154	1.85067	2.66989	2.83969	2.73282	2.48761	2.56573	2.37211	2.27789	2.58389	2.73282	3.05856	2.76035	2.18358	2.70943	2.37604	1.76043		40.6667	-0.000478303	0.00111683	0.000934472	0.000813586	0.00138166	-7.32231e-07	0.000171924	0.00147946	0.00185815	-0.0019884	0.00121752	0.00254943	0.00187878	0.00621467	0.00117406	0.00105678	0.00568824	0.00018161	-0.00027583	0.000745173
41	2.4775	2.1234	2.092	2.24256	1.85375	2.70849	2.84531	2.73407	2.47888	2.63115	2.38506	2.28339	2.6168	2.7127	3.0582	2.76035	2.18206	2.70739	2.37837	1.7598		41	-0.000546574	0.0010014	0.000997594	0.00102271	0.00154376	-0.00116041	-7.26116e-05	0.00109394	0.00103877	-0.00376047	0.000973467	0.00202077	0.00139565	0.0065185	0.000989269	0.000937682	0.00579891	0.000282512	-0.000237495	0.000993002
41.3333	2.47658	2.12125	2.09473	2.24256	1.85128	2.6716	2.83848	2.73574	2.48715	2.5675	2.37403	2.28039	2.58654	2.7349	3.05928	2.76195	2.1856	2.70821	2.37651	1.76294		41.3333	-0.000607289	0.00128416	0.000862875	0.000913546	0.00153335	-0.00493877	-0.00071448	0.000894393	0.00179654	-0.00991707	0.000269926	0.00192109	-0.00170818	0.00871722	0.000667446	0.000231142	0.00602765	0.000363238	-0.000183915	0.00113742
41.6667	2.4775	2.1234	2.09309	2.24205	1.85251	2.70976	2.84611	2.73574	2.4798	2.63288	2.3841	2.28189	2.62072	2.71775	3.0553	2.75915	2.18611	2.70821	2.37883	1.76105		41.6667	-0.000546497	0.00134623	0.000853894	0.00109771	0.00153258	-0.000152583	0.000251028	0.000632983	0.00104689	-0.00233865	0.00157335	0.00240649	0.00203841	0.00662544	0.000649628	-0.000264068	0.00613709	0.000208534	7.65416e-05	0.00132341
42	2.47427	2.12125	2.09473	2.24408	1.85251	2.67245	2.83929	2.73532	2.48761	2.56217	2.37739	2.28139	2.58831	2.74157	3.0553	2.75915	2.18712	2.70984	2.37697	1.76043		42	-0.000242887	0.0016297	0.000781995	0.0013156	0.00133932	0.00201168	0.000469631	-6.88278e-05	-0.00030213	0.00106164	0.00170863	0.00222392	0.00394454	0.00488613	0.000452854	-0.000607272	0.00675912	9.42022e-05	-5.3772e-05	0.00156107
42.3333	2.4775	2.1234	2.09036	2.2451	1.8519	2.70976	2.84611	2.73657	2.48026	2.62855	2.38553	2.28339	2.62507	2.72152	3.05892	2.76195	2.19166	2.70821	2.37744	1.76231		42.3333	-0.000167018	0.00134553	0.000889903	0.00134042	0.0014198	-0.00191946	0.000350768	-0.000165065	0.00045525	-0.00461064	0.000791182	0.0022638	0.000933662	0.00664648	0.000190672	-0.000488477	0.00671114	0.000121128	-7.74017e-06	0.00146823
42.6667	2.47658	2.12554	2.09581	2.24256	1.85498	2.67117	2.84049	2.73407	2.48761	2.5675	2.37691	2.28589	2.58875	2.74157	3.06036	2.76035	2.19267	2.70862	2.37697	1.76105		42.6667	0.000318664	0.00139005	0.000691918	0.00175908	0.00172391	-0.00131765	0.000523025	4.12544e-05	0.000242406	-0.0028442	0.00119487	0.00267521	0.00132972	0.00629827	0.000280078	-0.000528153	0.00726054	-3.36004e-05	-0.000368212	0.00147753
43	2.47796	2.12447	2.09255	2.24713	1.85559	2.67373	2.84049	2.7349	2.48486	2.56617	2.37691	2.28239	2.59271	2.74323	3.0582	2.76275	2.1962	2.70943	2.37837	1.76482		43	0.000591964	0.00121278	0.000628721	0.00180055	0.00178402	-0.000587527	0.000925743	-8.94404e-05	0.000196907	-0.00136768	0.000971897	0.00293584	0.00200351	0.00624871	0.000393327	-0.000409266	0.00746424	0.000147996	-0.000544408	0.00162177
43.3333	2.47612	2.12823	2.09255	2.2451	1.85498	2.67117	2.84049	2.73532	2.48623	2.56573	2.37835	2.28539	2.59227	2.74739	3.05711	2.75795	2.19771	2.70943	2.37651	1.76482		43.3333	0.000842448	0.0011952	0.000440148	0.00183382	0.00175386	0.000218486	0.00136913	-0.000247565	0.000135919	0.000523719	0.00151726	0.0032073	0.00250881	0.00530945	0.000423184	-0.000772523	0.00726748	-6.72615e-05	-0.000414048	0.0014562
43.6667	2.4775	2.12554	2.09418	2.24713	1.85682	2.7127	2.84731	2.7349	2.48164	2.62941	2.38792	2.28888	2.62681	2.73031	3.05856	2.75995	2.20122	2.70821	2.37976	1.76482		43.6667	0.000994204	0.00152117	0.000637794	0.00205904	0.00188458	-0.00271621	0.00109773	-0.00017877	0.00105153	-0.00399632	0.000545344	0.00334552	-6.74354e-07	0.00654406	0.000572164	-0.000799061	0.00739356	-0.000195055	-0.000521256	0.0017967
44	2.47934	2.12662	2.09418	2.24662	1.85559	2.7009	2.84411	2.73198	2.47842	2.61156	2.38266	2.28789	2.61854	2.73407	3.05928	2.75835	2.20824	2.7078	2.37558	1.76544		44	0.00114605	0.00153885	0.000906945	0.00176575	0.00169197	0.00218942	0.00216798	0.000233634	0.000249217	0.00546013	0.00163408	0.00371329	0.00397124	0.00367693	0.000488573	-0.000864957	0.00733609	-0.000437254	-8.44721e-05	0.0017654
44.3333	2.47612	2.12715	2.09473	2.24764	1.85805	2.67245	2.8437	2.7349	2.48623	2.56973	2.38075	2.28988	2.59535	2.75112	3.0582	2.75955	2.20524	2.70821	2.37744	1.76294		44.3333	0.00111518	0.00185507	0.00123014	0.00209109	0.00183274	-0.000513285	0.00179103	0.000433039	0.00108164	0.000537737	0.000907972	0.00356405	0.00131865	0.00502087	0.000244183	-0.000686616	0.00726797	-0.000343102	-5.37077e-05	0.00160991
44.6667	2.48026	2.12447	2.09527	2.24916	1.85805	2.67202	2.8425	2.73574	2.48853	2.56973	2.38123	2.28988	2.59491	2.7532	3.05928	2.75795	2.21074	2.70862	2.37325	1.76732		44.6667	0.00123655	0.00213681	0.00122028	0.00231643	0.00149792	0.00471759	0.00290676	0.000955351	0.000710907	0.00925288	0.00206755	0.00404525	0.0056895	0.00232102	0.000232302	-0.000693377	0.00739969	-0.000363258	0.000114977	0.00135188
45	2.47888	2.12662	2.09636	2.24916	1.85928	2.71186	2.85012	2.73574	2.4798	2.63288	2.38745	2.29486	2.63071	2.73824	3.05892	2.76075	2.20924	2.70943	2.37651	1.76732		45	0.00114547	0.00221644	0.00157924	0.00185584	0.00156842	0.00452392	0.00294581	0.000941637	0.000945946	0.00875652	0.00177532	0.00406135	0.00470852	0.0018028	0.000458606	-0.000752789	0.00774941	-0.000457443	7.67723e-05	0.000814923
45.3333	2.4798	2.12608	2.09418	2.24916	1.85621	2.67458	2.84571	2.73449	2.48853	2.57194	2.38266	2.29137	2.59842	2.75361	3.05856	2.75594	2.21124	2.7078	2.37697	1.76607		45.3333	0.00123647	0.00238348	0.00173116	0.0020312	0.00153794	0.00106527	0.00247003	0.00114094	0.00189791	0.00302647	0.000614896	0.00391861	0.00190712	0.00303442	8.92281e-05	-0.000515338	0.0071436	-0.000470949	0.000291431	0.000691233
45.6667	2.48026	2.13251	2.09527	2.2522	1.86112	2.67416	2.84651	2.7349	2.49036	2.5715	2.37979	2.29486	2.60018	2.75651	3.05856	2.75675	2.21524	2.7078	2.37651	1.76857		45.6667	0.00114515	0.00291295	0.00174854	0.00176334	0.00128479	-0.00251312	0.0019676	0.00140891	0.00288028	-0.00284276	-0.000466398	0.00379356	-0.00126343	0.00458795	2.36816e-05	-0.000330368	0.007052	-0.000154804	0.000115238	0.000598452
46	2.4798	2.12876	2.09799	2.24916	1.85805	2.70934	2.85252	2.73824	2.4821	2.63721	2.38984	2.29784	2.62811	2.73866	3.06072	2.75875	2.21773	2.70657	2.3793	1.76794		46	0.00147043	0.00305347	0.00171258	0.00190482	0.00121397	0.00249022	0.00283796	0.00172476	0.00258571	0.0051522	0.000637623	0.0046243	0.00240567	0.00225825	0.000255862	-0.000112345	0.00701093	-0.000181692	0.000597957	0.000526247
46.3333	2.4821	2.13518	2.09745	2.25423	1.86234	2.67586	2.84691	2.73699	2.4899	2.57505	2.38027	2.29585	2.60018	2.75692	3.06	2.76115	2.22171	2.7078	2.37744	1.76857		46.3333	0.00168823	0.00329654	0.00175725	0.00181256	0.00101691	0.00465136	0.00293557	0.0015388	0.00205773	0.00828919	0.000656354	0.00467543	0.00404645	0.000863576	0.000333261	-0.000134505	0.00751135	-0.000244069	0.000565948	0.000479487
46.6667	2.48118	2.13465	2.09962	2.25372	1.85989	2.71312	2.85532	2.73907	2.48669	2.63764	2.39031	2.3023	2.63028	2.74199	3.05892	2.75634	2.2242	2.70821	2.37837	1.76669		46.6667	0.00142906	0.00360668	0.00182446	0.00172721	0.00103757	0.00331766	0.00287131	0.00162528	0.00235045	0.00618127	0.000338003	0.00483125	0.002745	0.00129984	0.000265758	3.28258e-05	0.00743786	-0.000267176	0.000786528	-3.40995e-05
47	2.48072	2.13198	2.09853	2.25119	1.86173	2.70386	2.85252	2.73699	2.48532	2.61724	2.38649	2.29784	2.61941	2.74407	3.05964	2.75675	2.23065	2.70698	2.37697	1.76607		47	0.00171324	0.00336712	0.00192823	0.00176858	0.00100421	0.000699351	0.00232774	0.00183366	0.00315982	0.00211546	-0.000140506	0.00477927	0.000218217	0.00238393	0.00034784	1.72535e-07	0.00791587	-0.0002078	0.000278896	-4.54257e-05
47.3333	2.48164	2.13518	2.10071	2.25372	1.86112	2.6733	2.84932	2.73866	2.49539	2.57416	2.37931	2.3023	2.6015	2.76023	3.05603	2.75634	2.22321	2.70657	2.3779	1.76669		47.3333	0.00174637	0.00318408	0.00222998	0.00169704	0.00116628	0.00580056	0.00304116	0.00206289	0.00219882	0.0102743	0.000549044	0.00552991	0.00451899	0.000433099	0.000379012	0.000641247	0.00775747	0.000122365	0.000139426	-6.2405e-05
47.6667	2.48256	2.13625	2.10071	2.25271	1.8605	2.67501	2.85052	2.73949	2.49585	2.5746	2.37883	2.3023	2.59974	2.76147	3.06	2.76035	2.23115	2.70943	2.37604	1.76732		47.6667	0.00192015	0.00231093	0.0018837	0.00137468	0.000372676	0.003217	0.00270026	0.00188991	0.00288036	0.00561266	0.000307137	0.00529247	0.00210364	0.00149603	0.000283489	0.000286276	0.00725811	0.000233161	-4.47056e-11	-0.000491242
48	2.48623	2.13679	2.09962	2.25574	1.86112	2.71397	2.85811	2.74115	2.4899	2.64197	2.38984	2.31071	2.62985	2.74448	3.06181	2.75875	2.23313	2.70739	2.37883	1.76794		48	0.0022154	0.00286534	0.0013394	0.00179103	0.000723404	-0.00296158	0.0019276	0.00142803	0.00471498	-0.00536844	-0.00148714	0.00552018	-0.0026202	0.00480233	3.8299e-05	-0.000171575	0.00686332	0.000437272	-0.000498065	-0.000267924

## Sheet: Radius-slope 40s
t (h)	Radius [mm]																																		t (h)	Slope
2.66667																																			2.66667
3																																			3
3.33333	0.569222	0.571223	0.571223	0.658437	0.668753	0.622819	0.628291	0.642653	0.575204																		0.674804								3.33333
3.66667	0.708515	0.695513	0.695513	0.770237	0.800738	0.758294	0.771716	0.790702	0.695513	0.678912	0.672156				0.594707	0.628291	0.653218										1.15548	0.728366	0.629028						3.66667
4	0.813461	0.792144	0.792144	0.86775	0.91635	0.875603	0.888537	0.906335	0.797884	0.758294	0.773193	0.665332	0.573217		0.730711	0.758294	0.807831	0.668753	0.761297	0.683934	0.607988						1.34797	0.852789	0.792324	0.618396	0.74487	0.797885			4	0.305803	0.242804	0.242804	0.247468	0.259621	0.273105	0.269508	0.270386	0.246501	0.23662	0.21774	0.235445	0.215318	0.206344
4.33333	0.937277	0.862475	0.862475	0.955361	0.995136	0.968408	0.974281	0.989387	0.876905	0.846452	0.8356	0.747688	0.646194		0.843752	0.847799	0.917594	0.779073	0.872993	0.796453	0.714927	0.592786					1.49345	0.949673	0.927296	0.731394	0.897004	1.00947			4.33333	0.303078	0.242006	0.242006	0.243776	0.254563	0.266713	0.263335	0.264747	0.242785	0.237752	0.216431	0.229899	0.212311	0.214712
4.66667	1.03338	0.937277	0.937277	1.03338	1.07664	1.05631	1.06062	1.07558	0.955361	0.925024	0.908849	0.8356	0.727581		0.948169	0.942133	1.00993	0.866434	0.957746	0.898751	0.802162	0.667045	0.573217	0.677229			1.62528	1.03648	1.02576	0.823783	1.02144	1.13034	0.585342		4.66667	0.299865	0.242128	0.242128	0.2409	0.249488	0.261248	0.260469	0.260035	0.24019	0.238266	0.216024	0.225666	0.210001	0.210909
5	1.12433	1.01781	1.01781	1.11208	1.15831	1.14444	1.14344	1.16126	1.02785	1.00427	0.987078	0.915104	0.805002		1.04436	1.02005	1.09555	0.954166	1.04108	0.99284	0.883386	0.726012	0.656702	0.774668			1.74846	1.12249	1.11061	0.906808	1.11656	1.23232	0.679699		5	0.299865	0.242128	0.242128	0.2409	0.249488	0.261248	0.260469	0.260035	0.24019	0.238266	0.216024	0.225666	0.210001	0.210909
5.33333	1.21691	1.09137	1.09137	1.18461	1.23182	1.21972	1.22159	1.23921	1.10591	1.07875	1.05523	0.993989	0.86775	0.594707	1.13342	1.10797	1.17591	1.03559	1.11822	1.08192	0.9625	0.789258	0.743096	0.866434	0.573217		1.85876	1.20603	1.19405	0.989568	1.20327	1.32231	0.737414		5.33333	0.296062	0.239426	0.239426	0.2378	0.241244	0.254481	0.256445	0.253071	0.23744	0.238582	0.216032	0.21964	0.203838	0.201486
5.66667	1.30381	1.16617	1.16617	1.25567	1.30818	1.28974	1.29503	1.31514	1.18075	1.15536	1.1223	1.06813	0.936059	0.660168	1.22253	1.19897	1.26111	1.1223	1.20182	1.17785	1.04218	0.849143	0.83012	0.956554	0.653218	0.620985	1.96569	1.29101	1.26768	1.06177	1.28844	1.39709	0.818399		5.66667	0.285127	0.232444	0.232444	0.229981	0.225361	0.240842	0.244271	0.237828	0.228905	0.237819	0.214946	0.215464	0.19892	0.195772
6	1.40328	1.24381	1.24381	1.33409	1.38774	1.37369	1.37453	1.39185	1.25203	1.2309	1.18846	1.13141	1.00313	0.73227	1.30556	1.2764	1.33751	1.19611	1.28264	1.26563	1.1172	0.900019	0.902551	1.03889	0.73227	0.700417	2.05906	1.37235	1.34468	1.13813	1.36508	1.47483	0.897004		6	0.277629	0.228848	0.228848	0.224743	0.213789	0.231466	0.237471	0.228876	0.224557	0.235992	0.210963	0.21106	0.193456	0.191932
6.33333	1.50526	1.33066	1.33066	1.40896	1.4622	1.45045	1.45124	1.47308	1.32895	1.32034	1.26292	1.19992	1.06919	0.809242	1.39349	1.35614	1.41783	1.27729	1.36118	1.35698	1.19229	0.955361	0.975451	1.12939	0.800738	0.773193	2.1427	1.45217	1.41517	1.20144	1.43533	1.55081	0.962389		6.33333	0.270424	0.226333	0.226333	0.220874	0.205101	0.225476	0.233322	0.222513	0.221791	0.233053	0.208467	0.202967	0.18561	0.188072
6.66667	1.59362	1.41542	1.41542	1.48389	1.53007	1.52484	1.54269	1.54934	1.40571	1.3992	1.33665	1.26833	1.13543	0.871685	1.48696	1.44572	1.49385	1.34939	1.44888	1.4473	1.27282	1.00427	1.05523	1.21222	0.878205	0.849143	2.23164	1.53505	1.48528	1.28156	1.50964	1.628	1.04498		6.66667	0.264727	0.221682	0.221682	0.217453	0.195469	0.220054	0.228854	0.2155	0.218199	0.228721	0.204942	0.194948	0.175742	0.184485
7															1.5814	1.53899	1.57635	1.43065	1.53677	1.54269	1.34601	1.06492	1.12737	1.29503	0.945759	0.913857	2.32288	1.62187	1.54867	1.35288	1.58046	1.70169	1.10961		7	0.257847	0.216659	0.216659	0.21345	0.185835	0.215371	0.224416	0.208334	0.214365	0.223421	0.201913	0.187423	0.16707	0.181655
7.33333	1.779	1.55448	1.55448	1.63392	1.65542	1.67188	1.69829	1.69021	1.55668	1.55815	1.48235	1.39757	1.24747	0.99284	1.6671	1.63042	1.66093	1.50829	1.62341	1.64297	1.41542	1.11618	1.20087	1.37535	1.0234	0.985921	2.40747	1.70817	1.61778	1.4307	1.65092	1.77356	1.18756		7.33333	0.250045	0.21065	0.21065	0.209044	0.1768	0.212034	0.220574	0.201241	0.209795	0.217006	0.198726	0.180461	0.159065	0.179315
7.66667	1.85067	1.62972	1.62972	1.70432	1.70967	1.74402	1.76806	1.75446	1.62482	1.62972	1.54491	1.45986	1.29943	1.04764	1.74533	1.71633	1.74141	1.58932	1.70298	1.73155	1.48926	1.1691	1.26923	1.45673	1.08928	1.05523	2.48962	1.79462	1.68537	1.51256	1.71463	1.84144	1.26332		7.66667	0.240802	0.20305	0.20305	0.203513	0.167383	0.207814	0.215008	0.193764	0.204535	0.209882	0.195306	0.174208	0.150306	0.173767
8	1.92796	1.69088	1.69088	1.76871	1.7603	1.80573	1.83581	1.81833	1.69492	1.70097	1.60717	1.51131	1.33921	1.10488	1.82646	1.80447	1.82584	1.65749	1.78348	1.82146	1.55081	1.21504	1.34176	1.53825	1.15041	1.11003	2.56613	1.87651	1.74466	1.593	1.77978	1.90632	1.33147		8	0.229351	0.193736	0.193736	0.196819	0.158015	0.202014	0.207289	0.184808	0.198151	0.201168	0.190114	0.168191	0.140859	0.167642
8.33333	2.0074	1.75316	1.75316	1.8327	1.80826	1.87273	1.90054	1.87638	1.75641	1.76677	1.65887	1.56472	1.39267	1.15634	1.91132	1.88971	1.90114	1.72891	1.85559	1.90953	1.6206	1.2593	1.4049	1.61354	1.21222	1.16323	2.64378	1.95498	1.80323	1.66093	1.83362	1.96681	1.3963		8.33333	0.217473	0.183322	0.183322	0.190017	0.149524	0.195822	0.199175	0.176567	0.19129	0.190989	0.184173	0.161076	0.130655	0.160695
8.66667	2.07503	1.80826	1.80826	1.89453	1.8519	1.93446	1.96431	1.9321	1.81456	1.81707	1.72164	1.61637	1.42105	1.2075	1.98568	1.96953	1.97993	1.79242	1.92678	1.98912	1.68005	1.30993	1.47076	1.68886	1.27282	1.21598	2.72042	2.03801	1.86588	1.72299	1.88063	2.02496	1.45749		8.66667	0.207943	0.176278	0.176278	0.183205	0.143654	0.192945	0.19201	0.170474	0.186258	0.182301	0.180035	0.154775	0.122078	0.156693
9	2.13892	1.87334	1.87334	1.95324	1.89754	1.99942	2.02775	1.98568	1.87577	1.87577	1.78796	1.6623	1.46532	1.26202	2.05125	2.04289	2.04121	1.85866	1.99084	2.06566	1.7401	1.36202	1.52932	1.75706	1.32809	1.26833	2.79497	2.12041	1.92765	1.79093	1.93394	2.07563	1.51476		9	0.198465	0.17182	0.17182	0.175592	0.140447	0.190447	0.186638	0.166078	0.183594	0.174208	0.177156	0.148973	0.114963	0.152481
9.33333	2.20717	1.925	1.925	2.01023	1.94505	2.06731	2.09799	2.03785	1.93682	1.92973	1.84139	1.713	1.5045	1.31601	2.12017	2.12125	2.12017	1.91906	2.0518	2.14052	1.79369	1.40083	1.59577	1.82334	1.38939	1.32379	2.86411	2.19921	1.98972	1.86114	1.97746	2.11832	1.56641		9.33333	0.195282	0.171383	0.171383	0.172567	0.140262	0.18951	0.184083	0.164559	0.183048	0.171717	0.17553	0.146912	0.114296	0.149787
9.66667	2.26634	1.97531	1.97531	2.06455	1.98855	2.12501	2.14903	2.09036	1.99084	1.99084	1.90234	1.76225	1.54195	1.36286	2.19109	2.19525	2.19317	1.9782	2.11532	2.22417	1.84758	1.44651	1.65473	1.89031	1.44651	1.37535	2.94403	2.27869	2.05422	1.93108	2.02277	2.16579	1.62187		9.66667	0.187401	0.167049	0.167049	0.165693	0.138473	0.18512	0.177698	0.160268	0.178164	0.164792	0.171129	0.141823	0.110199	0.143837
10	2.32204	2.02155	2.02155	2.11909	2.03	2.18065	2.19889	2.13198	2.04177	2.04065	1.94915	1.80826	1.57127	1.41138	2.25423	2.26281	2.25423	2.03729	2.17384	2.29734	1.90174	1.48773	1.71766	1.95907	1.50223	1.42265	3.01781	2.35736	2.11257	1.99803	2.08572	2.20924	1.68275		10	0.177333	0.16257	0.16257	0.15831	0.13644	0.178876	0.170122	0.15434	0.170622	0.156704	0.16521	0.137213	0.106168	0.136648
10.3333	2.37835	2.06897	2.06897	2.17436	2.07117	2.23031	2.25777	2.19109	2.10179	2.092	2.00626	1.85128	1.5972	1.44809	2.31712	2.32155	2.32253	2.08873	2.2298	2.36681	1.94798	1.52409	1.76677	2.01534	1.56399	1.47618	3.09484	2.42804	2.16273	2.06013	2.1334	2.25087	1.73131		10.3333	0.166217	0.156616	0.156616	0.149825	0.132845	0.170334	0.161398	0.147256	0.162172	0.148923	0.158279	0.130644	0.100564	0.128389
10.6667	2.45251	2.14425	2.14425	2.23287	2.12876	2.31909	2.33184	2.25574	2.17646	2.15274	2.07722	1.90474	1.64228	1.50905	2.37355	2.38218	2.38314	2.14797	2.28739	2.43664	1.99771	1.54047	1.82709	2.07613	1.61919	1.52259	3.16999	2.50996	2.21074	2.11362	2.18307	2.29705	1.77605		10.6667	0.155088	0.15026	0.15026	0.140439	0.128251	0.160988	0.151793	0.138933	0.152093	0.140834	0.148765	0.123025	0.0952399	0.118916
11	2.5186	2.20976	2.20976	2.28339	2.18953	2.38362	2.39365	2.3181	2.25423	2.2144	2.14212	1.95324	1.68141	1.55522	2.43289	2.44225	2.44692	2.2051	2.34404	2.50634	2.05013	1.56107	1.87759	2.13572	1.67665	1.56836	3.24307	2.58031	2.26751	2.16477	2.22768	2.33712	1.82939		11	0.142829	0.142525	0.142525	0.130163	0.121952	0.149953	0.141147	0.129247	0.140259	0.130842	0.138118	0.114999	0.0888869	0.108369
11.3333	2.55816	2.25574	2.25574	2.32253	2.22211	2.43101	2.43054	2.35133	2.29436	2.24967	2.17751	1.98568	1.71766	1.58429	2.50589	2.52494	2.53891	2.29137	2.42396	2.58919	2.12393	1.60646	1.94622	2.22006	1.7486	1.64297	3.34011	2.67164	2.34137	2.23856	2.29849	2.39181	1.90458		11.3333	0.129923	0.134461	0.134461	0.119486	0.11434	0.137745	0.129611	0.118947	0.127576	0.120266	0.127298	0.106032	0.082787	0.0979064
11.6667	2.59183	2.29436	2.29436	2.35666	2.26029	2.46596	2.46318	2.39031	2.32106	2.28189	2.20924	2.01647	1.7401	1.60788	2.56261	2.58742	2.60413	2.34988	2.48761	2.65833	2.17961	1.64019	2.00683	2.28938	1.81078	1.69829	3.44693	2.76275	2.42758	2.31574	2.38718	2.46014	1.97242		11.6667	0.117616	0.125102	0.125102	0.109017	0.106237	0.126018	0.118792	0.107732	0.114774	0.10898	0.115737	0.0966661	0.0769226	0.088583
12	2.62159	2.32842	2.32842	2.38984	2.29535	2.49539	2.49722	2.41548	2.3421	2.30725	2.24205	2.0518	1.76225	1.63392	2.60588	2.63548	2.66047	2.39651	2.53306	2.71607	2.21697	1.66024	2.05292	2.34599	1.85866	1.74075	3.50544	2.81624	2.48384	2.35783	2.43395	2.51348	2.01346		12	0.105539	0.115127	0.115127	0.0990542	0.0973696	0.113526	0.107308	0.096086	0.102142	0.0980496	0.103983	0.0869897	0.070527	0.079224
12.3333	2.6493	2.3586	2.3586	2.41784	2.3181	2.52539	2.5281	2.43945	2.37066	2.34015	2.27538	2.07062	1.77707	1.65404	2.64542	2.67032	2.69963	2.43523	2.57726	2.75692	2.2522	1.68344	2.09146	2.39794	1.89814	1.779	3.54899	2.85444	2.52488	2.38903	2.45925	2.54016	2.06227		12.3333	0.0933859	0.10387	0.10387	0.0895986	0.0876692	0.100531	0.0954033	0.0832757	0.0889111	0.0865917	0.0915367	0.0775976	0.0641703	0.0704287
12.6667	2.67672	2.39317	2.39317	2.44225	2.34502	2.55905	2.55905	2.46272	2.39508	2.36681	2.30032	2.09091	1.79051	1.67325	2.6716	2.70554	2.73532	2.47381	2.61462	2.80126	2.28139	1.69761	2.12876	2.43898	1.93033	1.81015	3.57042	2.88027	2.56527	2.41754	2.47537	2.57044	2.08731		12.6667	0.0812396	0.0914956	0.0914956	0.0807668	0.0780186	0.0866644	0.0842086	0.0719016	0.0764197	0.0755828	0.0800479	0.0685807	0.0569069	0.0611647
13	2.69794	2.42161	2.42161	2.46272	2.36633	2.58434	2.58389	2.48164	2.41595	2.38888	2.32253	2.11424	1.8133	1.68886	2.70597	2.73782	2.77261	2.50907	2.64973	2.83969	2.31318	1.71167	2.16279	2.47934	1.96953	1.84201	3.59202	2.89787	2.59568	2.44573	2.49715	2.58843	2.10891		13	0.0718537	0.081658	0.081658	0.0731626	0.0700819	0.0770941	0.0761636	0.0629682	0.0671588	0.0663984	0.0708642	0.0608245	0.0517824	0.054606
13.3333	2.72068	2.44459	2.44459	2.48486	2.38553	2.605	2.60413	2.50452	2.43617	2.4098	2.34356	2.13411	1.82958	1.70633	2.73574	2.76972	2.81467	2.53981	2.68395	2.87245	2.34307	1.72429	2.18692	2.52132	2.00056	1.87334	3.62296	2.92104	2.62026	2.47269	2.51699	2.61646	2.13443		13.3333	0.0656151	0.0740555	0.0740555	0.0668396	0.0642798	0.0698518	0.0705003	0.0569503	0.0619438	0.0597844	0.0646282	0.0543109	0.0480304	0.0496442
13.6667	2.74407	2.46642	2.46642	2.50907	2.40649	2.63158	2.62551	2.52087	2.45715	2.42867	2.36633	2.14956	1.84696	1.72891	2.76147	2.79882	2.84491	2.56884	2.71354	2.90169	2.37018	1.74075	2.21285	2.55325	2.03281	1.90294	3.65213	2.94328	2.64545	2.50334	2.53929	2.63876	2.15505		13.6667	0.0596791	0.0675745	0.0675745	0.0610356	0.0578531	0.0633329	0.0649271	0.0506034	0.0578807	0.0535659	0.0581527	0.048206	0.0457693	0.0448334
14	2.76684	2.49173	2.49173	2.53396	2.42491	2.65059	2.64714	2.53576	2.48256	2.44412	2.38075	2.16174	1.85498	1.74272	2.78205	2.82357	2.87641	2.59974	2.7449	2.93375	2.39984	1.7486	2.23899	2.58698	2.05902	1.93151	3.68167	2.9687	2.67288	2.53319	2.56053	2.66169	2.18206		14	0.0542952	0.0612148	0.0612148	0.0552944	0.0524873	0.0569844	0.0592462	0.04566	0.0534417	0.0476467	0.0517811	0.0426639	0.0434598	0.0399341
14.3333	2.78451	2.51089	2.51089	2.55369	2.44085	2.66818	2.66775	2.54967	2.49905	2.45623	2.39889	2.17751	1.87334	1.75511	2.80208	2.84851	2.90679	2.63071	2.77631	2.962	2.42585	1.75576	2.25726	2.61898	2.08818	1.95732	3.70352	2.99576	2.70085	2.55577	2.57774	2.68361	2.20072		14.3333	0.0486635	0.054822	0.054822	0.0497771	0.0479518	0.0501507	0.0536183	0.0407684	0.0482062	0.0414712	0.0458361	0.0384854	0.0412509	0.0358468
14.6667	2.79596	2.52584	2.52584	2.56795	2.46179	2.68268	2.68438	2.56484	2.51271	2.47012	2.41689	2.19265	1.88427	1.76483	2.82357	2.86887	2.93375	2.65747	2.80452	2.98846	2.45808	1.7616	2.27939	2.64973	2.1137	1.99027	3.73295	3.01562	2.72692	2.57258	2.60036	2.70044	2.21474		14.6667	0.0428518	0.048312	0.048312	0.0444328	0.0430052	0.0432364	0.0478886	0.0361102	0.0433288	0.0362885	0.0403984	0.0340841	0.0387173	0.0317403
15	2.80696	2.53981	2.53981	2.5777	2.47704	2.69794	2.7009	2.57638	2.52674	2.48072	2.42585	2.19992	1.90114	1.77386	2.83848	2.88354	2.96008	2.68438	2.83245	3.01393	2.48394	1.76742	2.29635	2.67885	2.13679	2.0159	3.75568	3.03607	2.75233	2.59057	2.62026	2.72286	2.23115		15	0.0375141	0.0424191	0.0424191	0.039078	0.0381506	0.0371515	0.0425943	0.0318189	0.0383829	0.0316516	0.0351926	0.0297026	0.0350999	0.0276513
15.3333	2.82074	2.55191	2.55191	2.58919	2.48578	2.70934	2.71439	2.58654	2.53531	2.48944	2.43804	2.2051	1.91251	1.78028	2.85811	2.90011	2.98503	2.70301	2.85332	3.03468	2.50452	1.77129	2.3112	2.70554	2.1538	2.03953	3.78236	3.05458	2.77274	2.60248	2.63582	2.73986	2.24842		15.3333	0.0321759	0.0373299	0.0373299	0.0334942	0.0336396	0.0314705	0.0373015	0.0275233	0.0333025	0.0271412	0.0303375	0.0257658	0.0323062	0.0233774
15.6667	2.82801	2.56662	2.56662	2.59974	2.49082	2.71565	2.72571	2.58919	2.54698	2.49814	2.44365	2.21337	1.92381	1.7854	2.87165	2.91855	3.00635	2.72236	2.87483	3.05379	2.52042	1.77579	2.32793	2.73198	2.17803	2.05902	3.8016	3.07046	2.79378	2.61984	2.64962	2.75795	2.26556		15.6667	0.0270913	0.0322737	0.0322737	0.0279747	0.0290135	0.0259324	0.0317572	0.0236832	0.0281226	0.0229738	0.0255215	0.0222336	0.0294208	0.0192348
16	2.83929	2.5746	2.5746	2.60675	2.50179	2.72404	2.73574	2.59755	2.55414	2.50498	2.45204	2.22109	1.93151	1.79051	2.88196	2.93181	3.02338	2.73824	2.895	3.07242	2.53756	1.78156	2.33868	2.75195	2.19057	2.07667	3.81379	3.07765	2.8131	2.63582	2.66335	2.77274	2.27578		16	0.0229061	0.0275768	0.0275768	0.0233453	0.0245217	0.0211827	0.0264749	0.0203019	0.0236727	0.0194206	0.0215585	0.0187467	0.0267125	0.0162778
16.3333	2.8433	2.58124	2.58124	2.612	2.50953	2.7278	2.74199	2.60325	2.56039	2.50998	2.45855	2.22775	1.93858	1.79877	2.88987	2.94074	3.03956	2.75485	2.90954	3.08539	2.55726	1.78284	2.34939	2.77219	2.20407	2.09908	3.82883	3.08482	2.82447	2.64837	2.67742	2.78745	2.28305		16.3333	0.0195408	0.023884	0.023884	0.019832	0.0208789	0.0171218	0.0218705	0.0169785	0.0206618	0.0160412	0.0177156	0.0152826	0.0233293	0.0136366
16.6667	2.84611	2.58698	2.58698	2.61811	2.51452	2.73073	2.74573	2.60894	2.56706	2.51543	2.46087	2.23287	1.94739	1.80257	2.90129	2.94772	3.05566	2.76684	2.92167	3.09535	2.57283	1.78412	2.35521	2.7882	2.21749	2.11802	3.84007	3.09413	2.8393	2.65754	2.69142	2.80326	2.29416		16.6667	0.016441	0.0209231	0.0209231	0.0167296	0.0178489	0.0137689	0.0176709	0.0138453	0.0175995	0.0128905	0.0146671	0.0128432	0.0205391	0.0113036
17	2.85172	2.59095	2.59095	2.6229	2.51679	2.73407	2.7503	2.61375	2.57061	2.51906	2.46504	2.23644	1.94915	1.8051	2.90601	2.95352	3.0661	2.77795	2.93647	3.10382	2.58478	1.78796	2.36295	2.80208	2.22365	2.1293	3.84927	3.09912	2.85483	2.66086	2.69962	2.8182	2.30185		17	0.0132454	0.0181858	0.0181858	0.0141025	0.0157746	0.0108586	0.0139334	0.0113628	0.0145984	0.0104859	0.0119676	0.0110284	0.017558	0.00880065
17.3333	2.85611	2.59886	2.59886	2.62681	2.52403	2.73782	2.7532	2.6168	2.57416	2.51996	2.47012	2.23797	1.95732	1.807	2.91189	2.96046	3.07316	2.7841	2.94578	3.113	2.59139	1.78476	2.36633	2.81751	2.23389	2.14159	3.85787	3.10375	2.86449	2.66916	2.70617	2.82916	2.30665		17.3333	0.00995229	0.0161991	0.0161991	0.0116375	0.0148015	0.00879378	0.0110291	0.00943403	0.0131613	0.00796155	0.00962096	0.00928031	0.0164195	0.00676917
17.6667	2.85851	2.60193	2.60193	2.62898	2.52674	2.74074	2.75527	2.61724	2.57593	2.52087	2.47058	2.2395	1.9614	1.80763	2.91542	2.96585	3.0828	2.79392	2.95313	3.11629	2.59886	1.78668	2.37018	2.82842	2.24052	2.15115	3.86446	3.11087	2.87066	2.67453	2.71269	2.83658	2.30952		17.6667	0.0077812	0.0137941	0.0137941	0.00975156	0.0131665	0.00735859	0.00860059	0.00793281	0.0107401	0.00601277	0.00773917	0.00741042	0.0138035	0.00484906
18	2.8633	2.60632	2.60632	2.63375	2.5272	2.74032	2.75817	2.62159	2.58213	2.52358	2.47381	2.2395	1.96489	1.81015	2.92206	2.96931	3.09093	2.798	2.96085	3.12288	2.60763	1.78604	2.37355	2.83848	2.24561	2.16279	3.8676	3.11335	2.8772	2.67742	2.71717	2.84397	2.3143		18	0.00566884	0.0124902	0.0124902	0.00818491	0.0117764	0.00646171	0.00699503	0.0062378	0.0100174	0.00388559	0.00627908	0.00554999	0.0130792	0.0031313
18.3333	2.86489	2.61025	2.61025	2.63678	2.53441	2.74323	2.76189	2.62159	2.58786	2.52313	2.47612	2.24052	1.96837	1.81078	2.92323	2.97008	3.09683	2.8037	2.96624	3.12689	2.61331	1.78732	2.37595	2.84611	2.24865	2.16859	3.87132	3.11548	2.87989	2.6832	2.72286	2.85057	2.31621		18.3333	0.00464338	0.0108937	0.0108937	0.00662446	0.010276	0.00575668	0.00578693	0.00472951	0.00850486	0.0027694	0.00522145	0.00411574	0.0114181	0.0018752
18.6667	2.8633	2.61506	2.61506	2.63505	2.54025	2.74531	2.76106	2.62159	2.58566	2.52449	2.47888	2.24561	1.97184	1.81078	2.92596	2.97239	3.10198	2.80858	2.97008	3.132	2.61506	1.78668	2.37643	2.85132	2.25372	2.17803	3.87617	3.11832	2.88679	2.68484	2.72286	2.85715	2.32193		18.6667	0.00336383	0.00975432	0.00975432	0.00534537	0.00942558	0.00512179	0.00488233	0.00352593	0.00816295	0.00152917	0.00488846	0.00300476	0.0108158	0.00123848
19	2.8621	2.61724	2.61724	2.63678	2.54205	2.74573	2.76189	2.62246	2.58478	2.5272	2.47474	2.24561	1.97358	1.807	2.92596	2.97354	3.10492	2.81061	2.9743	3.13564	2.62029	1.78796	2.37979	2.8605	2.25524	2.18588	3.87902	3.11797	2.89138	2.6869	2.72692	2.86179	2.32193		19	0.00215747	0.00813927	0.00813927	0.00389946	0.00784781	0.00430339	0.00428518	0.00253334	0.00705275	0.00116278	0.0039199	0.00225676	0.00953637	0.000966999
19.3333	2.85931	2.62377	2.62377	2.63851	2.54877	2.74697	2.76395	2.6242	2.59623	2.52313	2.4775	2.24662	1.9874	1.80826	2.92791	2.9743	3.10823	2.81467	2.97699	3.13746	2.62159	1.78668	2.38075	2.86648	2.25928	2.18901	3.86102	3.10447	2.90663	2.70167	2.75273	2.88832	2.33759		19.3333	0.00138039	0.00626078	0.00626078	0.00311156	0.00612226	0.00358208	0.00365645	0.00205862	0.00597318	0.00111758	0.00332479	0.00182003	0.00778114	0.00108026
19.6667	2.8633	2.61941	2.61941	2.6411	2.54384	2.74822	2.76354	2.62464	2.58786	2.52584	2.47658	2.24713	1.97358	1.80763	2.92908	2.97699	3.1097	2.81751	2.97852	3.14	2.62246	1.78732	2.38266	2.86887	2.26231	2.19317	3.88784	3.12823	2.89367	2.68937	2.73137	2.86372	2.32288		19.6667	0.000854195	0.0047473	0.0047473	0.00194767	0.00480122	0.00317667	0.00315104	0.0015132	0.00488079	0.00103526	0.00296704	0.00135016	0.00632934	0.00119412
20	2.8625	2.62464	2.62464	2.64067	2.55012	2.75278	2.76684	2.62594	2.60018	2.51996	2.48072	2.24459	1.9897	1.80826	2.93025	2.97929	3.11006	2.81791	2.98005	3.14399	2.6242	1.78476	2.38266	2.87721	2.26835	2.19577	3.88414	3.12328	2.89863	2.69142	2.73784	2.87412	2.32859		20	0.000111619	0.00373677	0.00373677	0.000698677	0.00391646	0.00282007	0.00278874	0.000982061	0.00449693	0.000886089	0.00263168	0.00113177	0.00638206	0.000955272
20.3333	2.86608	2.62203	2.62203	2.63937	2.54609	2.75112	2.76601	2.6242	2.59271	2.52584	2.48118	2.2451	1.98223	1.81078	2.93064	2.97775	3.11226	2.82196	2.98273	3.14363	2.62855	1.78796	2.38218	2.88236	2.26785	2.202	3.88613	3.1254	2.9032	2.69471	2.74147	2.87989	2.32859		20.3333	7.88875e-05	0.00252799	0.00252799	0.000199533	0.00215246	0.00214171	0.0023459	0.000738359	0.00348077	0.000945762	0.00238835	0.000729052	0.00497397	0.00108013
20.6667	2.8633	2.62681	2.62681	2.64153	2.55101	2.75195	2.76684	2.62507	2.60369	2.52223	2.48578	2.24459	1.99314	1.81078	2.93258	2.9812	3.11336	2.82155	2.98311	3.14581	2.63115	1.78859	2.38362	2.88631	2.27338	2.2051	3.88756	3.12646	2.90434	2.69553	2.74389	2.88142	2.33238		20.6667	-0.00015783	0.00179386	0.00179386	-0.000192422	0.00144807	0.00169653	0.00203312	0.0005806	0.00367533	0.000402074	0.00246348	0.000267906	0.00474818	0.00112197
21	2.86409	2.6229	2.6229	2.63764	2.54474	2.75071	2.76972	2.6242	2.59535	2.52674	2.48118	2.2451	1.98511	1.81204	2.93181	2.98044	3.11373	2.82398	2.98426	3.14545	2.63245	1.78796	2.38506	2.89026	2.27338	2.20717	3.88869	3.12823	2.90663	2.69553	2.74469	2.88832	2.33333		21	-0.000164263	0.000961283	0.000961283	-0.000648642	0.000790393	0.00121761	0.00144822	5.73153e-05	0.00226188	0.000387411	0.00218346	0.000343276	0.00336357	0.0012261
21.3333	2.86489	2.62159	2.62159	2.64197	2.54564	2.75112	2.76808	2.62637	2.59623	2.52765	2.48348	2.24611	1.98453	1.81456	2.9322	2.98044	3.11556	2.82519	2.98732	3.14762	2.63158	1.78668	2.38458	2.89263	2.27589	2.21027	3.89153	3.13141	2.90929	2.70208	2.74791	2.89138	2.33664		21.3333	-0.00040724	0.00030124	0.00030124	-0.000990678	0.000221644	0.000649827	0.000781833	-0.000422931	0.000536076	0.000707782	0.00133413	0.000343312	0.00176166	0.000883207
21.6667	2.86449	2.62116	2.62116	2.63678	2.54609	2.75278	2.7689	2.6242	2.59623	2.52765	2.48302	2.24561	1.98396	1.81393	2.9322	2.98005	3.11593	2.8268	2.98885	3.14943	2.63375	1.78732	2.38506	2.89539	2.27689	2.2144	3.89097	3.13141	2.91081	2.7029	2.74711	2.89672	2.33759		21.6667	-0.00154485	0.000645344	0.000645344	-0.00131141	0.00100351	0.000266759	0.000407986	-0.000781364	0.000746916	3.73013e-05	0.000924819	0.000644627	0.00264202	0.000176628
22	2.8609	2.62637	2.62637	2.63505	2.55101	2.75237	2.77055	2.62507	2.605	2.5272	2.48486	2.24764	1.99885	1.81078	2.9322	2.98235	3.11666	2.8268	2.98961	3.15052	2.63288	1.78604	2.38553	2.89815	2.27839	2.2144	3.89324	3.1307	2.91194	2.70208	2.74872	2.89634	2.33806		22	-0.00203144	0.000229418	0.000229418	-0.00128302	0.00121657	2.73388e-05	-0.000394291	-0.000996399	-0.00015192	-0.000372558	0.000128851	0.000669784	0.00161583	-0.000706888
22.3333	2.8629	2.62333	2.62333	2.63808	2.54564	2.75154	2.7689	2.6242	2.59623	2.5272	2.4844	2.24713	1.98626	1.81204	2.93142	2.98311	3.11776	2.82801	2.98923	3.15161	2.63375	1.78796	2.38697	2.90011	2.27989	2.21697	3.89437	3.13211	2.91384	2.70657	2.75113	2.89825	2.34137		22.3333	-0.00241261	-5.02081e-05	-5.02081e-05	-0.00129745	0.00108403	0.000116182	-0.000904178	-0.00126919	-0.00094244	-0.0012743	-0.00054553	0.00042698	0.000859736	-0.00136143
22.6667	2.85891	2.62637	2.62637	2.63635	2.55101	2.75237	2.76766	2.62551	2.60413	2.52223	2.48669	2.24662	1.99771	1.81078	2.9322	2.98197	3.11739	2.82801	2.99113	3.15161	2.63505	1.78923	2.38697	2.90169	2.27889	2.21903	3.89608	3.13247	2.91536	2.70371	2.75153	2.90092	2.34184		22.6667	-0.0024066	-0.000602276	-0.000602276	-0.00131882	0.000464293	0.000116186	-0.00161142	-0.00175712	-0.00273372	-0.0015574	-0.00145535	0.000326536	-0.000682429	-0.00176663
23	2.8621	2.62246	2.62246	2.63764	2.54743	2.75112	2.76684	2.62246	2.59315	2.52584	2.48164	2.24713	1.98683	1.81141	2.93297	2.9812	3.11849	2.82963	2.99037	3.15305	2.63332	1.78987	2.3884	2.90522	2.27989	2.21852	3.89693	3.13282	2.91498	2.70617	2.75153	2.90206	2.3442		23	-0.00274897	-0.000308415	-0.000308415	-0.00114811	0.000958956	-1.36827e-05	-0.00198524	-0.00182167	-0.00245884	-0.00288564	-0.00174405	-0.000159222	-3.80736e-05	-0.00228653
23.3333	2.8609	2.6229	2.6229	2.63721	2.54743	2.75071	2.76601	2.62203	2.59227	2.52629	2.48118	2.24662	1.98511	1.81141	2.93103	2.98311	3.11995	2.82842	2.99075	3.15197	2.63461	1.78796	2.38553	2.9064	2.27839	2.21903	3.89919	3.13176	2.91536	2.70576	2.75474	2.90701	2.34231		23.3333	-0.00303929	-0.000394271	-0.000394271	-0.00155509	0.000472075	-0.000259748	-0.00196498	-0.00224527	-0.00292889	-0.00367776	-0.0027153	-0.000670186	-0.000386458	-0.00261959
23.6667	2.85492	2.62637	2.62637	2.63548	2.55414	2.75195	2.76725	2.62116	2.59974	2.52087	2.48348	2.24865	1.996	1.807	2.93375	2.98158	3.11995	2.82761	2.99075	3.15161	2.63418	1.78923	2.38458	2.90601	2.27939	2.22006	3.89948	3.13247	2.91725	2.70617	2.75193	2.90396	2.34326		23.6667	-0.00295457	-0.000924923	-0.000924923	-0.00148499	-0.000228918	-0.000615279	-0.00194446	-0.00237523	-0.00347921	-0.00416429	-0.00327712	-0.001022	-0.000697309	-0.00252703
24	2.85611	2.6242	2.6242	2.63548	2.55503	2.75278	2.76395	2.62159	2.59886	2.51996	2.48164	2.24561	1.99428	1.80573	2.93103	2.98311	3.11849	2.82761	2.99113	3.15124	2.63505	1.78732	2.38506	2.90836	2.28039	2.22109	3.90004	3.13282	2.91763	2.70576	2.75354	2.90548	2.34184		24	-0.00275144	-0.0017285	-0.0017285	-0.00189946	-0.000959497	-0.00106705	-0.00192419	-0.00274914	-0.00402253	-0.00433717	-0.00366418	-0.00147443	-0.00146217	-0.00245548
24.3333	2.85691	2.62029	2.62029	2.63461	2.54609	2.75154	2.76312	2.61898	2.58742	2.52087	2.47888	2.24561	1.98165	1.807	2.93064	2.98044	3.11886	2.82721	2.99075	3.15088	2.63375	1.78796	2.38506	2.90954	2.28039	2.22109	3.89891	3.13141	2.91725	2.70535	2.75273	2.90663	2.34373		24.3333	-0.00256047	-0.00194445	-0.00194445	-0.00264278	-0.00109233	-0.0014024	-0.00172759	-0.00289359	-0.00356835	-0.00443573	-0.00385487	-0.00187725	-0.000688135	-0.00274779
24.6667	2.85571	2.61985	2.61985	2.63505	2.54519	2.75237	2.76147	2.61767	2.58389	2.52042	2.47566	2.24662	1.98108	1.80637	2.93103	2.98082	3.11812	2.82559	2.9919	3.15269	2.63505	1.78796	2.38362	2.91189	2.28089	2.22314	3.90061	3.13211	2.91801	2.7029	2.75113	2.90663	2.34278		24.6667	-0.00242325	-0.00259821	-0.00259821	-0.00285067	-0.00204497	-0.00188841	-0.00185093	-0.00294448	-0.00401155	-0.00434795	-0.00391654	-0.00224655	-0.00128302	-0.00266547
25	2.85372	2.62246	2.62246	2.63375	2.55056	2.7503	2.76312	2.61985	2.59051	2.51316	2.47566	2.24357	1.99027	1.80447	2.92869	2.98005	3.11703	2.8268	2.9919	3.15233	2.63375	1.78796	2.38458	2.9115	2.28039	2.21954	3.90146	3.13105	2.91763	2.70249	2.75233	2.90396	2.34231		25	-0.0025355	-0.00303812	-0.00303812	-0.00311544	-0.00243701	-0.00244354	-0.00214463	-0.00301103	-0.00366807	-0.00454248	-0.00371413	-0.00253188	-0.000603546	-0.0026142
25.3333	2.85172	2.62246	2.62246	2.63115	2.54788	2.7503	2.76312	2.61636	2.59051	2.5118	2.47243	2.24256	1.98912	1.80384	2.92908	2.97775	3.11776	2.82519	2.99113	3.15161	2.63245	1.78796	2.38171	2.91111	2.27889	2.22006	3.89891	3.13211	2.91687	2.70331	2.75273	2.90739	2.34326		25.3333	-0.00229305	-0.00379345	-0.00379345	-0.00345302	-0.00296864	-0.00283387	-0.00246566	-0.00329988	-0.00430871	-0.00415545	-0.003791	-0.00277572	-0.00102862	-0.00238627
25.6667	2.85252	2.61941	2.61941	2.62985	2.54519	2.74864	2.76395	2.61549	2.58786	2.51135	2.47243	2.24256	1.99084	1.80384	2.92752	2.97699	3.11812	2.82438	2.98999	3.1498	2.63202	1.78732	2.38171	2.91268	2.27889	2.22057	3.90004	3.1307	2.91687	2.70044	2.75113	2.90282	2.34231		25.6667	-0.00196467	-0.00449204	-0.00449204	-0.00363327	-0.00365599	-0.00325174	-0.00288919	-0.00358192	-0.00466502	-0.00357485	-0.00383776	-0.00285996	-0.00178531	-0.00178293
26	2.85212	2.6168	2.6168	2.62898	2.54429	2.74531	2.7623	2.61375	2.58654	2.5118	2.47289	2.24154	1.98798	1.80257	2.92713	2.97737	3.11556	2.82276	2.99075	3.15124	2.63288	1.78732	2.38123	2.91307	2.27889	2.21903	3.89948	3.12717	2.91612	2.70003	2.74912	2.90206	2.33995		26	-0.00220225	-0.00452327	-0.00452327	-0.00363389	-0.00336944	-0.00361564	-0.00328001	-0.00388582	-0.00437896	-0.0034039	-0.00347521	-0.00276075	-0.0013614	-0.00197166
26.3333	2.85412	2.61593	2.61593	2.62637	2.54429	2.74573	2.76106	2.61331	2.58478	2.51044	2.47104	2.23899	1.98683	1.80067	2.92635	2.97584	3.11483	2.82115	2.98961	3.1498	2.63115	1.78476	2.38123	2.9115	2.27939	2.22057	3.89891	3.13105	2.91687	2.69594	2.75032	2.9013	2.34137		26.3333	-0.00234134	-0.00474164	-0.00474164	-0.00386473	-0.00294369	-0.0035411	-0.00371742	-0.00374332	-0.00417461	-0.00324058	-0.00312753	-0.00264358	-0.00118394	-0.00208686
26.6667	2.85012	2.61331	2.61331	2.62681	2.54115	2.74407	2.75817	2.61331	2.58257	2.50953	2.47058	2.23848	1.98568	1.80131	2.92557	2.97622	3.11446	2.81832	2.98923	3.14907	2.62985	1.78668	2.38027	2.91307	2.27789	2.21954	3.89863	3.12823	2.91612	2.69512	2.74992	2.90054	2.33995		26.6667	-0.00218372	-0.00525429	-0.00525429	-0.00422524	-0.00332891	-0.00360378	-0.00414131	-0.00382367	-0.00491231	-0.00273329	-0.00319105	-0.00253514	-0.00237885	-0.00199383
27	2.85012	2.61025	2.61025	2.62637	2.53981	2.74115	2.7561	2.60981	2.57903	2.50953	2.46827	2.23848	1.98511	1.80067	2.92596	2.97584	3.11263	2.81872	2.98808	3.14726	2.62941	1.7854	2.37883	2.91189	2.27739	2.21954	3.89778	3.12646	2.91725	2.69594	2.74831	2.89558	2.33995		27	-0.00203255	-0.0057388	-0.0057388	-0.0041415	-0.00412996	-0.00330346	-0.00459909	-0.0039039	-0.00585342	-0.00206885	-0.00324556	-0.00239414	-0.00367837	-0.00200557
27.3333	2.84851	2.60894	2.60894	2.62246	2.5407	2.7424	2.75485	2.6085	2.5777	2.50907	2.46827	2.23695	1.98453	1.80004	2.92323	2.97546	3.11116	2.8167	2.98732	3.14798	2.62941	1.78604	2.37979	2.91268	2.27739	2.21852	3.89976	3.12646	2.91839	2.69389	2.74791	2.8952	2.33995		27.3333	-0.00195363	-0.00559773	-0.00559773	-0.00395001	-0.00411105	-0.00317435	-0.0047231	-0.00354562	-0.00591493	-0.00212199	-0.00340019	-0.00252989	-0.00383162	-0.00187011
27.6667	2.84851	2.60675	2.60675	2.62203	2.53801	2.74115	2.75278	2.60675	2.57903	2.50771	2.46689	2.23746	1.98281	1.80194	2.9244	2.97392	3.1108	2.81507	2.98694	3.14798	2.62768	1.78412	2.37691	2.91307	2.27689	2.22057	3.89806	3.12646	2.91763	2.69676	2.74308	2.89176	2.33995		27.6667	-0.00205936	-0.0052196	-0.0052196	-0.00411725	-0.00410603	-0.00310781	-0.0045809	-0.00357614	-0.00564121	-0.00226504	-0.0034694	-0.0025813	-0.00399435	-0.00194403
28	2.84771	2.60675	2.60675	2.62333	2.53846	2.73866	2.74947	2.605	2.5746	2.5068	2.46596	2.23542	1.98165	1.7975	2.92206	2.97392	3.1108	2.81426	2.98655	3.14762	2.62594	1.7854	2.37547	2.91268	2.27538	2.22057	3.89749	3.12646	2.91574	2.69471	2.74308	2.89405	2.3357		28	-0.00196715	-0.00493435	-0.00493435	-0.00421977	-0.00415208	-0.00299972	-0.00411829	-0.00353456	-0.00554991	-0.00235557	-0.00353149	-0.00224558	-0.00400732	-0.00187163
28.3333	2.84611	2.60413	2.60413	2.61898	2.53621	2.7399	2.74988	2.60632	2.57061	2.50543	2.46504	2.23695	1.97877	1.79814	2.91933	2.97239	3.1086	2.81386	2.98541	3.14653	2.6242	1.78412	2.37691	2.91072	2.27488	2.21903	3.89721	3.12505	2.91612	2.69348	2.74711	2.88985	2.33712		28.3333	-0.00196095	-0.00476412	-0.00476412	-0.00404184	-0.00416862	-0.00318633	-0.00364176	-0.00373874	-0.00518035	-0.00242409	-0.00354871	-0.00222997	-0.00409515	-0.00179893
28.6667	2.84651	2.60237	2.60237	2.61593	2.53531	2.73782	2.74864	2.60456	2.56973	2.50543	2.46133	2.23542	1.97704	1.7975	2.92011	2.97315	3.10896	2.81102	2.98503	3.14508	2.6229	1.7822	2.37259	2.91111	2.27739	2.218	3.89693	3.12505	2.9146	2.69224	2.74469	2.88793	2.33617		28.6667	-0.00158538	-0.00452211	-0.00452211	-0.00389902	-0.00400009	-0.00309837	-0.0031584	-0.00366831	-0.00487674	-0.0025977	-0.00360377	-0.00206183	-0.00444106	-0.00207159
29	2.84611	2.60018	2.60018	2.6168	2.53035	2.73824	2.7478	2.60369	2.56884	2.50498	2.46226	2.23287	1.97589	1.7956	2.91894	2.97239	3.10786	2.81142	2.98541	3.14436	2.6229	1.78284	2.37355	2.91111	2.27639	2.21903	3.89579	3.12611	2.91574	2.69142	2.74268	2.88755	2.33617		29	-0.00149973	-0.0045259	-0.0045259	-0.00361312	-0.0042622	-0.00280359	-0.00294134	-0.00333079	-0.00450657	-0.00259821	-0.0033683	-0.002096	-0.00413778	-0.00188346
29.3333	2.84611	2.60018	2.60018	2.61636	2.5299	2.73657	2.74697	2.60325	2.5675	2.50361	2.45901	2.23134	1.97589	1.7975	2.91776	2.97277	3.10713	2.81305	2.98158	3.14363	2.62203	1.78156	2.37162	2.91033	2.27538	2.21749	3.89636	3.12505	2.91422	2.68978	2.74227	2.8864	2.3357		29.3333	-0.000991142	-0.00460104	-0.00460104	-0.00299645	-0.00474071	-0.00303806	-0.00311494	-0.00334677	-0.00575426	-0.0021704	-0.0034921	-0.00213894	-0.0058016	-0.00141256
29.6667	2.84531	2.59886	2.59886	2.61287	2.52945	2.73365	2.74697	2.60062	2.56706	2.5027	2.46087	2.23134	1.97473	1.79496	2.91698	2.97123	3.10639	2.80899	2.9835	3.14218	2.62029	1.78284	2.37259	2.91111	2.27388	2.21697	3.89608	3.12576	2.91346	2.68896	2.74107	2.88219	2.33286		29.6667	-0.000773122	-0.00405954	-0.00405954	-0.00278148	-0.0042442	-0.00272936	-0.00289037	-0.0033989	-0.0052055	-0.00204343	-0.00323342	-0.00218996	-0.00505845	-0.00127665
30	2.84531	2.59755	2.59755	2.612	2.529	2.73323	2.74656	2.59974	2.56439	2.50224	2.45901	2.23338	1.97184	1.79496	2.91659	2.97047	3.10492	2.80777	2.98235	3.14291	2.62029	1.78092	2.37114	2.91033	2.27438	2.21543	3.89551	3.12646	2.90967	2.69142	2.74107	2.87989	2.33333		30	-0.000581582	-0.00361889	-0.00361889	-0.00247307	-0.00366483	-0.00251001	-0.00258979	-0.00310277	-0.00431357	-0.00177326	-0.00291323	-0.00198831	-0.00443902	-0.000450387
30.3333	2.8437	2.59579	2.59579	2.61287	2.52765	2.73156	2.74573	2.59667	2.56484	2.50042	2.45669	2.2298	1.97126	1.79496	2.91424	2.97047	3.10492	2.80736	2.98082	3.14218	2.61898	1.78092	2.37162	2.91033	2.27438	2.21697	3.89693	3.12363	2.91194	2.68855	2.73986	2.87605	2.33238		30.3333	-0.000297437	-0.00309182	-0.00309182	-0.00174077	-0.0028405	-0.00244154	-0.00240488	-0.00292938	-0.00405895	-0.00162335	-0.00245514	-0.00203087	-0.00353293	-0.000324636
30.6667	2.8437	2.59403	2.59403	2.61287	2.52674	2.73156	2.74448	2.59711	2.56261	2.49905	2.45576	2.23236	1.96721	1.79242	2.9162	2.96931	3.10419	2.80533	2.98005	3.14182	2.61854	1.7822	2.3697	2.91033	2.27338	2.21594	3.89551	3.12399	2.9127	2.68978	2.73945	2.87758	2.33096		30.6667	0.000270603	-0.00323928	-0.00323928	-0.00144635	-0.00341862	-0.00220849	-0.00242622	-0.00267	-0.00470135	-0.00109727	-0.00229597	-0.00186333	-0.00460134	9.41622e-05
31	2.8437	2.59095	2.59095	2.61156	2.52313	2.73323	2.7424	2.59711	2.56217	2.49996	2.45669	2.2298	1.97184	1.79496	2.91424	2.96931	3.10456	2.80452	2.97814	3.14145	2.61724	1.78028	2.37018	2.91072	2.27237	2.21594	3.89891	3.12363	2.90853	2.68937	2.73905	2.87489	2.33096		31	0.000422687	-0.00316104	-0.00316104	-0.00140338	-0.00277194	-0.00174075	-0.00211793	-0.00222899	-0.00409901	-0.000849381	-0.001699	-0.00144214	-0.00373993	0.000387413
31.3333	2.84691	2.59007	2.59007	2.61287	2.51951	2.72947	2.73824	2.59491	2.54653	2.5027	2.45344	2.22827	1.95032	1.7975	2.9115	2.96816	3.10529	2.80452	2.97814	3.14182	2.61767	1.779	2.3697	2.90954	2.27338	2.21594	3.89778	3.12222	2.90815	2.68731	2.74147	2.87258	2.33191		31.3333	0.000574771	-0.00287146	-0.00287146	-0.00124549	-0.00230244	-0.00124573	-0.00195366	-0.00182415	-0.0034452	-0.000338299	-0.00117119	-0.00125667	-0.00291653	0.000534088
31.6667	2.84531	2.59447	2.59447	2.61113	2.52494	2.73156	2.74074	2.59359	2.56083	2.49905	2.45483	2.22827	1.96953	1.79432	2.91307	2.96893	3.10309	2.80533	2.97852	3.14254	2.61549	1.78028	2.37066	2.91033	2.27288	2.21543	3.90004	3.12363	2.91081	2.68731	2.74187	2.87451	2.33143		31.6667	0.000957987	-0.00249512	-0.00249512	-0.00131129	-0.00178078	-0.000771068	-0.00167264	-0.00131793	-0.00315183	-0.000165418	-0.00114065	-0.00122289	-0.00195005	0.0008064
32	2.84451	2.59359	2.59359	2.61069	2.52629	2.73031	2.74157	2.59667	2.55994	2.50042	2.45483	2.22878	1.96779	1.79814	2.91228	2.96701	3.10345	2.80411	2.97699	3.14145	2.61636	1.779	2.37162	2.90954	2.27388	2.2144	3.90033	3.12611	2.91043	2.6869	2.73864	2.86912	2.32906		32	0.00132125	-0.00216942	-0.00216942	-0.00147715	-0.00125913	-0.000371773	-0.00120649	-0.00105754	-0.00232139	9.77862e-05	-0.000666242	-0.00107943	-0.00108853	0.0011724
32.3333	2.84571	2.59227	2.59227	2.61156	2.52629	2.72989	2.7424	2.59579	2.55548	2.49905	2.4553	2.22724	1.96953	1.7956	2.90915	2.96739	3.10529	2.8033	2.97699	3.14145	2.61375	1.77964	2.37018	2.90915	2.27288	2.21543	3.90033	3.1254	2.90853	2.68814	2.73905	2.87104	2.32906		32.3333	0.00156567	-0.00198891	-0.00198891	-0.00156357	-0.000558656	-0.00020655	-0.000740341	-0.000652073	-0.00185073	0.000646505	-0.000444356	-0.000700126	-0.000187967	0.00138158
32.6667	2.85012	2.5861	2.5861	2.61025	2.51271	2.72864	2.73866	2.59359	2.54788	2.50316	2.45158	2.22622	1.9509	1.7975	2.91228	2.96662	3.10456	2.8033	2.97622	3.14218	2.61375	1.78092	2.37018	2.90836	2.27187	2.2144	3.90203	3.12505	2.90967	2.68814	2.73986	2.87027	2.33096		32.6667	0.0017898	-0.00199711	-0.00199711	-0.00170079	-0.00102224	-0.00022718	-0.000610474	-0.00091327	-0.0019634	0.00108227	-0.000444386	-0.000641012	-0.00137164	0.00169502
33	2.84611	2.58742	2.58742	2.60981	2.52223	2.73156	2.74157	2.59535	2.55771	2.49996	2.45808	2.22878	1.96779	1.79687	2.91111	2.96585	3.10272	2.80248	2.97622	3.14145	2.61375	1.77772	2.3697	2.90797	2.27388	2.21388	3.90288	3.12576	2.90777	2.68896	2.73945	2.87027	2.32906		33	0.00155858	-0.00184486	-0.00184486	-0.00159282	-0.000157336	0.000151481	-0.000329345	-0.000811864	-0.00114647	0.00117982	-0.000536325	-5.06228e-05	-0.000727043	0.0012865
33.3333	2.84651	2.58963	2.58963	2.60894	2.52403	2.73031	2.7399	2.59447	2.55726	2.50224	2.45576	2.22827	1.96721	1.7975	2.90954	2.96624	3.10272	2.80045	2.97661	3.14145	2.61375	1.77964	2.36874	2.90876	2.27036	2.2144	3.90373	3.12576	2.91005	2.68855	2.73905	2.86989	2.32859		33.3333	0.00143944	-0.00209195	-0.00209195	-0.00188883	2.9789e-05	0.000564586	-0.000247026	-0.000688754	-0.000175045	0.00114982	-0.000329446	0.000489215	0.000461827	0.00125491
33.6667	2.84891	2.58875	2.58875	2.60588	2.52403	2.73073	2.74074	2.59447	2.55325	2.49996	2.45344	2.22775	1.96721	1.79687	2.90915	2.96354	3.10161	2.80248	2.97584	3.14145	2.61375	1.779	2.36922	2.90954	2.27187	2.21594	3.90514	3.12682	2.91081	2.68649	2.73905	2.86565	2.32764		33.6667	0.00149237	-0.00228801	-0.00228801	-0.00164395	-0.000118821	0.000516387	-0.000590202	-0.000616191	-0.000779478	0.00169074	-0.000268096	0.000767597	-0.00103414	0.00142231
34	2.85012	2.58786	2.58786	2.60719	2.52358	2.7324	2.74157	2.59359	2.55682	2.50133	2.45483	2.22827	1.96605	1.80067	2.90915	2.96547	3.10198	2.80289	2.97584	3.14073	2.61331	1.77964	2.36826	2.90954	2.27438	2.21388	3.90599	3.12823	2.90929	2.68855	2.73986	2.86796	2.32716		34	0.00142621	-0.00202002	-0.00202002	-0.00149256	-0.000887968	0.00054399	-0.000699989	-0.000855413	-0.00151173	0.00192297	-0.00049801	0.000691755	-0.00197648	0.0012336
34.3333	2.84972	2.5861	2.5861	2.60807	2.52494	2.73031	2.74115	2.59491	2.55459	2.50452	2.45344	2.22775	1.96837	1.80004	2.90836	2.96508	3.10088	2.80167	2.97661	3.14327	2.61244	1.77964	2.36826	2.90876	2.27237	2.21543	3.90486	3.12682	2.91043	2.68608	2.74026	2.86642	2.32716		34.3333	0.00104973	-0.00136638	-0.00136638	-0.00139891	-0.000179037	0.000564687	-0.000597017	-0.000500246	-0.00105503	0.00220042	-0.000122581	0.000978605	-0.000997182	0.00155738
34.6667	2.85212	2.58434	2.58434	2.60588	2.51407	2.72989	2.73782	2.59095	2.54653	2.50589	2.45297	2.22775	1.94739	1.80194	2.90876	2.96431	3.10125	2.80208	2.97546	3.14036	2.61156	1.77836	2.36826	2.90954	2.27187	2.21543	3.90684	3.12646	2.91081	2.68978	2.74066	2.86835	2.32764		34.6667	0.000798755	-0.000618029	-0.000618029	-0.00111789	0.000656525	0.000550921	-0.000446105	-0.000297258	-0.000796372	0.00190727	-7.50205e-06	0.00104604	0.000134912	0.00131673
35	2.84891	2.5861	2.5861	2.60719	2.52629	2.73365	2.73949	2.59315	2.55548	2.50498	2.45251	2.2298	1.96663	1.79877	2.90797	2.9647	3.10345	2.80248	2.97622	3.14036	2.61156	1.779	2.36922	2.91072	2.27036	2.21491	3.9108	3.12823	2.91005	2.6869	2.73986	2.86796	2.32811		35	0.00108912	-0.000683341	-0.000683341	-0.000714024	0.000170295	0.000227225	-0.000583359	-0.000398732	-0.000936392	0.00192256	-0.000352327	0.00112992	-0.000547566	0.00126443
35.3333	2.85092	2.58434	2.58434	2.60369	2.52358	2.7324	2.73907	2.59271	2.55637	2.50361	2.4539	2.23185	1.96663	1.80067	2.90719	2.96624	3.10235	2.80289	2.97546	3.14073	2.61069	1.77836	2.36826	2.91111	2.27237	2.21646	3.90854	3.12788	2.91043	2.68649	2.73945	2.86488	2.32859		35.3333	0.000923864	-0.00046512	-0.00046512	-0.000310135	0.000498719	0.000282343	-0.00043924	-0.000282744	-0.000236376	0.00138931	0.000153177	0.00149225	0.000296746	0.00137856
35.6667	2.85012	2.58478	2.58478	2.60632	2.52449	2.73198	2.73907	2.59403	2.55771	2.5068	2.45576	2.23134	1.96373	1.80067	2.90915	2.96431	3.10309	2.80045	2.97584	3.14254	2.61244	1.78028	2.36681	2.91228	2.27137	2.21697	3.90854	3.12964	2.91005	2.68731	2.74026	2.86873	2.32764		35.6667	0.000976013	0.000268902	0.000268902	-5.04596e-05	0.00105064	-6.19596e-05	-0.000569684	-0.000181202	0.000875236	0.00149419	0.00043671	0.00150072	0.00100726	0.00155516
36	2.85132	2.58345	2.58345	2.60632	2.51271	2.73073	2.73866	2.59227	2.5416	2.50862	2.45158	2.22827	1.94915	1.80131	2.90836	2.96508	3.10198	2.80289	2.97507	3.14073	2.61156	1.77643	2.36922	2.91268	2.27187	2.21749	3.91023	3.13	2.91194	2.68855	2.74026	2.86565	2.32859		36	0.000844083	0.000806833	0.000806833	0.000158703	0.00158764	-0.000344273	-0.000569718	-0.000362682	0.000935097	0.00104338	0.00045975	0.00143318	0.00170822	0.00126236
36.3333	2.85012	2.58654	2.58654	2.60544	2.52403	2.73198	2.73949	2.59447	2.55146	2.50907	2.45715	2.23134	1.96721	1.8032	2.91189	2.96585	3.10345	2.8037	2.97584	3.14	2.612	1.779	2.36826	2.91542	2.27087	2.21749	3.91165	3.13	2.91043	2.68567	2.74268	2.86758	2.32954		36.3333	0.00103524	0.000755955	0.000755955	0.00033911	0.00133508	-0.000247842	-0.000796825	-0.000616679	0.000397057	0.00134932	0.000613063	0.00139094	0.000595681	0.00148133
36.6667	2.85092	2.58786	2.58786	2.60544	2.52494	2.7324	2.73866	2.59359	2.55325	2.50634	2.45437	2.23134	1.96663	1.80131	2.90915	2.96431	3.10272	2.80411	2.97507	3.14182	2.60938	1.78028	2.3697	2.91503	2.27187	2.22006	3.91447	3.13599	2.91346	2.68855	2.74066	2.86758	2.33049		36.6667	0.00106815	0.00108311	0.00108311	0.000613271	0.00199128	-8.26951e-05	-0.000659573	-0.000391838	0.0011561	0.00140178	0.000827465	0.00135683	0.00195703	0.00141872
37	2.85212	2.5861	2.5861	2.60719	2.5272	2.73115	2.73949	2.59271	2.55771	2.50589	2.4539	2.23338	1.96953	1.80194	2.91111	2.96585	3.10272	2.80248	2.97546	3.14218	2.60981	1.78092	2.37018	2.91542	2.27036	2.218	3.91306	3.13388	2.9165	2.68978	2.74107	2.86873	2.32764		37	0.00138463	0.00136621	0.00136621	0.000944885	0.00137857	-0.000151554	-0.00083809	-0.000275903	0.000640568	0.00187369	0.000919278	0.00100269	0.000687821	0.00187715
37.3333	2.85252	2.58742	2.58742	2.60719	2.52674	2.73198	2.73907	2.59271	2.55637	2.50452	2.4553	2.2344	1.96837	1.8051	2.9115	2.96585	3.10382	2.8037	2.9743	3.14327	2.61156	1.779	2.36874	2.91776	2.27488	2.22006	3.91504	3.13388	2.91422	2.68896	2.74187	2.87528	2.32764		37.3333	0.00128553	0.00164238	0.00164238	0.00117576	0.00215307	0.000165093	-0.000810596	0.000108381	0.00116406	0.00192607	0.000788985	0.000952028	0.00111107	0.00149101
37.6667	2.85532	2.59007	2.59007	2.60632	2.52765	2.72947	2.73782	2.59315	2.56083	2.50907	2.4553	2.23236	1.96779	1.80637	2.91111	2.9647	3.10382	2.8033	2.97469	3.14327	2.60938	1.779	2.36874	2.91698	2.27237	2.21903	3.91729	3.13564	2.91498	2.68937	2.74227	2.86873	2.33096		37.6667	0.0013975	0.00176557	0.00176557	0.00114653	0.00257752	0.000433566	-0.00083118	4.32338e-05	0.00173908	0.00134123	0.000520963	0.00126349	0.00152475	0.00185457
38	2.85212	2.58919	2.58919	2.60894	2.5281	2.72947	2.73782	2.59007	2.55548	2.50725	2.4553	2.23287	1.96779	1.80384	2.91228	2.96431	3.10309	2.8033	2.97469	3.14363	2.6085	1.77964	2.36777	2.91815	2.27237	2.22109	3.91673	3.13529	2.91498	2.68855	2.74348	2.86989	2.32954		38	0.00145653	0.00159118	0.00159118	0.00143472	0.00310604	0.000757015	-0.000769321	0.000391358	0.00229945	0.00144615	0.000505748	0.00113727	0.00199504	0.00192683
38.3333	2.85452	2.58434	2.58434	2.60763	2.52132	2.73115	2.73407	2.58963	2.54564	2.51452	2.4553	2.23338	1.9509	1.80573	2.90954	2.96431	3.10382	2.80452	2.97584	3.14399	2.61069	1.78028	2.36826	2.91815	2.27288	2.22211	3.91786	3.13705	2.91498	2.69183	2.74509	2.87027	2.33049		38.3333	0.00162105	0.00126386	0.00126386	0.00145636	0.00208974	0.000846454	-0.000638745	0.000558151	0.00118488	0.00170855	0.00016085	0.00102695	0.00054439	0.00198868
38.6667	2.85412	2.58963	2.58963	2.60763	2.52855	2.73407	2.73699	2.59227	2.55949	2.51044	2.45762	2.23491	1.97069	1.80447	2.91268	2.96393	3.10456	2.8037	2.97469	3.14581	2.60894	1.78028	2.37066	2.91737	2.27538	2.2216	3.91899	3.13811	2.91498	2.6906	2.74429	2.8722	2.33143		38.6667	0.00154161	0.00160457	0.00160457	0.00131208	0.00209679	0.00114231	-0.000274699	0.00105112	0.00118442	0.00199342	0.000291048	0.000967902	0.00100403	0.00224848
39	2.85492	2.59183	2.59183	2.61069	2.529	2.73282	2.73699	2.59535	2.55682	2.51407	2.45762	2.23287	1.96895	1.80826	2.9115	2.96585	3.10419	2.80411	2.97469	3.14545	2.61025	1.78028	2.36826	2.91737	2.27187	2.22314	3.9187	3.13951	2.91725	2.69224	2.74268	2.87027	2.33143		39	0.00146882	0.0020397	0.0020397	0.00113169	0.00210392	0.00163058	-8.23111e-05	0.00131222	0.00108891	0.00202306	0.000222134	0.000933988	0.00132035	0.00227841
39.3333	2.85492	2.59095	2.59095	2.60894	2.53126	2.73282	2.73699	2.59623	2.5586	2.51225	2.45669	2.2344	1.96721	1.80447	2.91424	2.96585	3.10492	2.80492	2.97546	3.14653	2.61025	1.78348	2.3697	2.91776	2.27237	2.22365	3.91955	3.13881	2.91839	2.69266	2.74429	2.86989	2.33096		39.3333	0.00161327	0.00200302	0.00200302	0.00102359	0.00227488	0.00176123	0.000460197	0.00147177	0.00156707	0.00212691	0.000114878	0.000891983	0.00194239	0.00213183
39.6667	2.85571	2.59227	2.59227	2.61069	2.53171	2.73365	2.73657	2.59271	2.5586	2.50862	2.45437	2.23644	1.96721	1.81078	2.91503	2.9647	3.10492	2.80492	2.97546	3.14871	2.61156	1.78156	2.36922	2.92011	2.27388	2.22365	3.92209	3.14092	2.91801	2.69183	2.7467	2.87143	2.33191		39.6667	0.00163272	0.00210423	0.00210423	0.000951466	0.00237132	0.00202251	0.00101639	0.00152262	0.00159703	0.00183362	0.000260307	0.00118641	0.00238299	0.00255691
40	2.85691	2.59007	2.59007	2.612	2.53306	2.7349	2.73699	2.59535	2.55726	2.51271	2.45483	2.23338	1.97126	1.80952	2.91542	2.96585	3.10419	2.80452	2.97546	3.14762	2.61025	1.78156	2.36922	2.9205	2.27589	2.22468	3.92068	3.14303	2.91877	2.69266	2.74711	2.87297	2.32954		40	0.00193545	0.0024089	0.0024089	0.000670256	0.00234914	0.00198069	0.0012225	0.00160972	0.00212676	0.00181094	0.000405707	0.000933955	0.00297573	0.00301334
40.3333	2.85771	2.59095	2.59095	2.61025	2.53261	2.73449	2.73782	2.59579	2.55905	2.51316	2.45623	2.23746	1.97011	1.81015	2.91542	2.96624	3.10382	2.80492	2.97699	3.14871	2.61113	1.78156	2.37162	2.92167	2.27589	2.2257	3.92265	3.14374	2.91877	2.69183	2.7459	2.87681	2.33286		40.3333	0.0019019	0.00254657	0.00254657	0.000663068	0.00263099	0.0019523	0.00143547	0.00123981	0.00204632	0.0018095	0.000313876	0.000942192	0.00350157	0.00332228
40.6667	2.85771	2.59535	2.59535	2.61025	2.53306	2.73574	2.73907	2.59711	2.56172	2.51362	2.4553	2.23593	1.97184	1.81141	2.91542	2.96508	3.10566	2.80655	2.97622	3.15016	2.61113	1.78348	2.37259	2.92362	2.27438	2.2257	3.92378	3.14585	2.91763	2.69266	2.7467	2.87528	2.33049		40.6667	0.00218427	0.00251474	0.00251474	0.00029553	0.00201925	0.00185563	0.0012977	0.000804451	0.000661369	0.00247473	0.000428615	0.000925251	0.00171693	0.00359053
41	2.85811	2.59623	2.59623	2.61069	2.53351	2.73782	2.73824	2.59623	2.56039	2.51498	2.45623	2.23695	1.97184	1.81267	2.91542	2.96547	3.10603	2.80614	2.97699	3.14943	2.61025	1.78284	2.37066	2.9244	2.27538	2.2257	3.9249	3.15006	2.9199	2.69101	2.74791	2.87297	2.32954		41	0.00207216	0.00244913	0.00244913	2.88488e-05	0.00183323	0.0020822	0.00141431	0.000507214	0.00113124	0.00296635	0.000750075	0.00146268	0.00206973	0.00348469
41.3333	2.86011	2.59491	2.59491	2.61025	2.53396	2.73657	2.74074	2.59667	2.56217	2.5177	2.45669	2.23542	1.97242	1.81204	2.91385	2.96547	3.10419	2.80614	2.97699	3.15161	2.612	1.78092	2.37018	2.92713	2.27589	2.22878	3.92519	3.14795	2.9199	2.6984	2.74711	2.87451	2.33143		41.3333	0.00212433	0.00278908	0.00278908	-2.15663e-05	0.00152112	0.00213671	0.00144853	0.000536208	0.000859354	0.00336986	0.00100269	0.00133628	0.00185052	0.00381489
41.6667	2.85971	2.59623	2.59623	2.61113	2.53486	2.73782	2.74157	2.59623	2.55994	2.51724	2.45808	2.23797	1.97242	1.81581	2.91659	2.96508	3.10749	2.80696	2.97737	3.15233	2.612	1.7854	2.37211	2.92635	2.27538	2.22775	3.92519	3.1483	2.91839	2.69635	2.75073	2.87797	2.33475		41.6667	0.00207121	0.0029476	0.0029476	-0.000216104	0.00152825	0.00208809	0.00135923	0.000724533	0.00103545	0.00360831	0.00122464	0.00127737	0.0016496	0.00341798
42	2.8605	2.59667	2.59667	2.61069	2.53396	2.73866	2.7399	2.59667	2.56039	2.51679	2.45855	2.23542	1.97531	1.81644	2.91463	2.96778	3.10676	2.80614	2.97967	3.15342	2.612	1.78284	2.37066	2.92635	2.27639	2.22878	3.92575	3.14655	2.92255	2.69635	2.74872	2.87566	2.33238		42	0.0018014	0.00323632	0.00323632	-0.000187274	0.00134267	0.0019435	0.00131088	0.000608242	0.00107942	0.00323309	0.00122436	0.00162172	0.00159093	0.00353118
42.3333	2.8617	2.59711	2.59711	2.61113	2.53756	2.74032	2.74032	2.59623	2.56039	2.52042	2.45669	2.23797	1.97589	1.81958	2.91659	2.96701	3.10786	2.80655	2.97814	3.15305	2.61287	1.78412	2.37211	2.93064	2.27538	2.2298	3.92716	3.15216	2.92028	2.69799	2.74831	2.87797	2.33286		42.3333	0.00187321	0.00341472	0.00341472	7.92179e-05	0.00145372	0.00152457	0.0010774	0.000470635	0.00115218	0.00320974	0.00108649	0.00172149	0.00169548	0.00331258
42.6667	2.86369	2.60237	2.60237	2.60938	2.53801	2.73949	2.74157	2.59711	2.55949	2.52087	2.45901	2.23797	1.97358	1.81958	2.91581	2.96662	3.10896	2.80777	2.9789	3.15559	2.61287	1.7822	2.37211	2.93258	2.27739	2.23134	3.928	3.14936	2.92331	2.69799	2.75273	2.88334	2.33143		42.6667	0.00173503	0.0033981	0.0033981	0.000108038	0.00154969	0.00120158	0.000940002	0.000224398	0.00115201	0.00302974	0.00107879	0.00211596	0.00173276	0.00302149
43	2.8617	2.59886	2.59886	2.61069	2.53666	2.74074	2.74199	2.59667	2.56439	2.52494	2.45901	2.24256	1.97589	1.81958	2.91815	2.96816	3.10786	2.80614	2.9812	3.15486	2.61375	1.78348	2.37307	2.93492	2.27639	2.2298	3.92913	3.14971	2.92104	2.69758	2.75193	2.88219	2.33143		43	0.00168858	0.00373674	0.00373674	0.000122451	0.00179359	0.000755221	0.000699865	4.33106e-05	0.00127691	0.00265588	0.000856802	0.00227504	0.00176102	0.00266874
43.3333	2.86369	2.60193	2.60193	2.60981	2.53621	2.74157	2.74199	2.59711	2.56083	2.52223	2.45855	2.2395	1.973	1.82209	2.91972	2.96624	3.1086	2.80858	2.9812	3.15378	2.61506	1.78412	2.37211	2.93414	2.27689	2.23287	3.92997	3.15357	2.92444	2.70044	2.75193	2.88564	2.33428		43.3333	0.00147146	0.00420488	0.00420488	0.000172885	0.00202258	0.000494402	0.000452739	1.43768e-05	0.00178238	0.00216308	0.000673148	0.00230858	0.00156095	0.00215114
43.6667	2.86409	2.60281	2.60281	2.61025	2.53801	2.74199	2.74157	2.59798	2.56395	2.52403	2.45947	2.2395	1.97589	1.82146	2.91894	2.96778	3.10896	2.80655	2.98044	3.15559	2.61462	1.78412	2.37211	2.93725	2.27839	2.23287	3.93138	3.15286	2.92255	2.69921	2.75032	2.88142	2.33238		43.6667	0.00128748	0.00434728	0.00434728	0.000554316	0.00196302	0.000274596	0.000507583	6.51019e-05	0.00225163	0.00210297	0.000489523	0.00225746	0.0013324	0.00153986
44	2.8625	2.60456	2.60456	2.61069	2.53666	2.74157	2.74323	2.5993	2.5635	2.52403	2.4604	2.24205	1.97877	1.82209	2.91933	2.96855	3.1097	2.80655	2.98044	3.15631	2.61506	1.78476	2.37403	2.93841	2.27689	2.23338	3.9325	3.15392	2.92369	2.70126	2.75314	2.8864	2.3357		44	0.00110336	0.00443207	0.00443207	0.00082794	0.00192575	0.000123541	0.000411584	9.40799e-05	0.00209024	0.00157336	0.000328931	0.00273436	0.000904012	0.00131187
44.3333	2.86568	2.60807	2.60807	2.61156	2.53891	2.73866	2.74199	2.59711	2.56617	2.52539	2.45947	2.24408	1.97762	1.82209	2.92167	2.97008	3.10823	2.80777	2.98235	3.15667	2.61331	1.7822	2.37259	2.94074	2.28039	2.23542	3.9339	3.15321	2.92444	2.70085	2.75273	2.88832	2.3338		44.3333	0.000794598	0.00453768	0.00453768	0.000964778	0.00162168	0.00030171	0.000171481	0.000188222	0.00218516	0.00119228	0.000122431	0.00237285	0.00074241	0.000712445
44.6667	2.86409	2.60807	2.60807	2.61113	2.54025	2.74074	2.74282	2.59579	2.56484	2.52539	2.45994	2.24408	1.97935	1.82271	2.92245	2.96931	3.1097	2.80777	2.98311	3.15739	2.61506	1.78348	2.37355	2.94074	2.27939	2.23593	3.93166	3.15672	2.92558	2.70167	2.75314	2.89023	2.33522		44.6667	0.000439974	0.00449867	0.00449867	0.00119518	0.00196186	0.000624028	-0.000295083	0.000289539	0.00230904	0.00101318	-0.000191219	0.00233021	0.000799599	0.000464647
45	2.86608	2.60938	2.60938	2.61113	2.5425	2.73907	2.74115	2.59491	2.56395	2.52494	2.45947	2.24459	1.97877	1.82271	2.92206	2.97123	3.11043	2.80655	2.9812	3.15992	2.61549	1.78348	2.37259	2.94423	2.27989	2.23746	3.9339	3.15321	2.92709	2.70208	2.75193	2.88832	2.33617		45	0.000485967	0.00472829	0.00472829	0.00121662	0.00244967	0.00078168	-0.000596971	0.00039816	0.00228578	0.00087127	-0.00026768	0.0020195	0.000380895	0.000247795
45.3333	2.86529	2.612	2.612	2.61113	2.5434	2.73907	2.7424	2.59711	2.56973	2.52403	2.45947	2.24357	1.97762	1.82146	2.92245	2.972	3.1108	2.80736	2.98235	3.15992	2.61593	1.78412	2.37499	2.94656	2.27939	2.23644	3.93503	3.15532	2.92558	2.70249	2.75434	2.88946	2.33617		45.3333	0.0005513	0.00447315	0.00447315	0.00156178	0.00249361	0.00104227	-0.00080967	0.000427134	0.00252746	0.00104257	-0.000428299	0.001936	-4.72591e-05	-1.0369e-05
45.6667	2.86449	2.61287	2.61287	2.61506	2.5416	2.74115	2.74323	2.59755	2.56884	2.52674	2.45947	2.24561	1.97762	1.82271	2.92284	2.97162	3.11153	2.80818	2.98426	3.15956	2.61549	1.78412	2.37259	2.94849	2.28039	2.23644	3.93756	3.15707	2.92633	2.70331	2.75474	2.8929	2.33712		45.6667	0.000505381	0.0043628	0.0043628	0.00174127	0.00241887	0.00145363	-0.000644975	0.000514018	0.0023726	0.000952948	-0.00048181	0.00175104	-0.0001525	4.12595e-05
46	2.86568	2.61375	2.61375	2.61375	2.54205	2.74115	2.74115	2.59798	2.56617	2.52403	2.45855	2.24967	1.97647	1.82396	2.92284	2.97162	3.1119	2.8098	2.9835	3.16028	2.6168	1.7854	2.37739	2.94965	2.27939	2.23848	3.93812	3.15882	2.92633	2.70453	2.75434	2.89481	2.3357		46	0.000708754	0.00387167	0.00387167	0.00175545	0.00246268	0.00200192	-0.00049401	0.000752875	0.00242341	0.00106445	-0.000527691	0.00126466	-0.000276079	0.000195929
46.3333	2.86449	2.61636	2.61636	2.61331	2.5416	2.74407	2.74157	2.59842	2.56928	2.5272	2.45762	2.24611	1.97647	1.82083	2.92245	2.97239	3.1119	2.80899	2.98426	3.16209	2.61636	1.78604	2.37595	2.95043	2.28039	2.23899	3.94008	3.15812	2.92709	2.70331	2.75434	2.88793	2.33901		46.3333	0.000521843	0.0036669	0.0036669	0.00182204	0.00225352	0.0024128	-0.000397398	0.00112865	0.00237109	0.00106098	-0.000472104	0.00108705	-0.000206103	0.000203428
46.6667	2.8633	2.61767	2.61767	2.61418	2.54519	2.74448	2.73907	2.5993	2.57106	2.52674	2.45855	2.24815	1.9782	1.82146	2.92401	2.9743	3.11116	2.80858	2.98541	3.16136	2.61724	1.78604	2.37643	2.95159	2.28139	2.23797	3.94064	3.15987	2.92746	2.70494	2.75594	2.89252	2.33617		46.6667	0.000705596	0.00370111	0.00370111	0.00197583	0.00215234	0.00248409	-0.000420087	0.00132956	0.00259194	0.00121921	-0.000506167	0.00106683	-0.000267833	0.000204739
47	2.86529	2.61767	2.61767	2.61462	2.54743	2.74448	2.73907	2.59886	2.57239	2.52765	2.45855	2.24713	1.97647	1.82209	2.92362	2.97239	3.11116	2.81021	2.98464	3.16317	2.61811	1.78796	2.37547	2.95275	2.28089	2.24001	3.94064	3.15882	2.92746	2.70371	2.75554	2.89596	2.33901		47	0.000658474	0.00351368	0.00351368	0.00202329	0.00210304	0.00285847	-0.000265	0.00132552	0.00253513	0.0014122	-0.000438699	0.000960641	-1.09866e-05	0.00031857
47.3333	2.86807	2.61941	2.61941	2.61724	2.54609	2.7449	2.73907	2.59886	2.5715	2.5272	2.45762	2.24561	1.97416	1.82209	2.92323	2.97354	3.113	2.81021	2.98464	3.16389	2.61985	1.78476	2.37691	2.95506	2.28189	2.24052	3.94148	3.16336	2.92633	2.70657	2.75514	2.90054	2.33664		47.3333	0.00101497	0.00320525	0.00320525	0.00194169	0.00239854	0.00289024	-0.000374674	0.000987857	0.00199726	0.00153536	-0.000394407	0.000813004	0.000316694	0.000500713
47.6667	2.86568	2.62072	2.62072	2.61767	2.54698	2.74614	2.7424	2.5993	2.57283	2.5281	2.45901	2.24865	1.9805	1.82271	2.9244	2.97392	3.1119	2.8098	2.98579	3.16425	2.61767	1.7854	2.37739	2.95776	2.28189	2.24001	3.94148	3.15987	2.93086	2.70453	2.75835	2.89825	2.33712		47.6667	0.00135054	0.0030988	0.0030988	0.00157337	0.00301044	0.00264296	-0.000148707	0.000925055	0.002584	0.00132227	-0.000265147	0.000109065	0.000555664	0.000402324
48	2.86807	2.61898	2.61898	2.6168	2.54788	2.7478	2.74282	2.60018	2.57328	2.529	2.45808	2.24713	1.9782	1.82459	2.92479	2.9743	3.113	2.81102	2.98694	3.16569	2.61811	1.78796	2.37691	2.95584	2.28389	2.24001	3.9426	3.16197	2.92935	2.70984	2.75634	2.89863	2.33948		48	0.00153535	0.00280232	0.00280232	0.0022434	0.00312233	0.00262774	0.000713285	0.000846582	0.00309155	0.00183843	4.97153e-05	-0.000543608	0.000988362	0.000670711
[truncated: 19 more columns]

## Sheet: Radius-slope 50s
t (h)	Radius [mm]																																t (h)	Slope
2.66667																																	2.66667
3	0.588924																																3
3.33333	0.771716	0.675542	0.764289	0.693871	0.598532	0.607988	0.624648	0.581123											0.6797	0.637753	0.585342	0.732904											3.33333
3.66667	0.880799	0.779073	0.86775	0.805002	0.722862	0.74156	0.749213	0.74463	0.665332		0.729148								0.870745	0.833122	0.812979	0.930865	0.618396	0.636018	0.743385	0.56419	0.756648	0.895771					3.66667
4	0.969586	0.866434	0.957746	0.89748	0.809242	0.8356	0.838326	0.841043	0.761297	0.663615	0.86775	0.758294	0.790702	0.733827	0.644426				1.01819	0.970395	0.953158	1.05341	0.781085	0.818399	0.870745	0.706802	0.900693	1.03648	0.702096	0.948508			4	0.271971	0.248693	0.249477	0.245851	0.241166	0.243887	0.241485	0.248133	0.239314	0.242015	0.267149	0.254756	0.273961	0.263033	0.295703	0.241793
4.33333	1.05198	0.955361	1.04436	0.980118	0.888537	0.915104	0.92379	0.927488	0.841043	0.755279	0.964867	0.88982	0.925024	0.853165	0.809242	0.592786	0.620985		1.18663	1.08544	1.06488	1.15452	0.880841	0.935603	0.971533	0.822441	1.03221	1.14491	0.864375	1.09457			4.33333	0.265894	0.247195	0.247731	0.24364	0.238375	0.24074	0.237835	0.24061	0.237418	0.238476	0.263386	0.24867	0.26601	0.256416	0.282206	0.23858
4.66667	1.14544	1.03779	1.12635	1.06062	0.964867	0.996282	1.00199	1.00313	0.918837	0.838326	1.05739	0.977788	1.02005	0.945759	0.926257	0.692225	0.729148	0.626472	1.30379	1.19867	1.14684	1.25366	0.970395	1.02899	1.06281	0.903144	1.11557	1.22962	0.97267	1.20327			4.66667	0.265894	0.247195	0.247731	0.24364	0.238375	0.24074	0.237835	0.24061	0.237418	0.238476	0.261859	0.244419	0.260118	0.250293	0.272094	0.236016
5	1.22346	1.11208	1.21222	1.13844	1.03559	1.07239	1.07664	1.07558	1.00199	0.92379	1.12939	1.06062	1.10797	1.03006	1.01669	0.774668	0.821833	0.711728	1.40891	1.285	1.2206	1.32398	1.05236	1.11359	1.1391	0.976073	1.17727	1.31728	1.06799	1.28156			5	0.258137	0.2434	0.245191	0.240957	0.232725	0.236651	0.232848	0.233333	0.234037	0.231297	0.261974	0.242436	0.257031	0.247239	0.26489	0.235144
5.33333	1.29855	1.19037	1.27819	1.20939	1.11516	1.13945	1.14643	1.14643	1.07875	1.00085	1.2075	1.14145	1.19133	1.11516	1.10281	0.853165	0.908849	0.793582	1.50304	1.37476	1.27897	1.3963	1.12642	1.18849	1.19775	1.05131	1.22782	1.39313	1.14298	1.35043			5.33333	0.240583	0.240911	0.24184	0.238285	0.228889	0.233228	0.229496	0.229101	0.230819	0.226579	0.261717	0.241403	0.255645	0.245354	0.259041	0.233923
5.66667	1.37535	1.26473	1.35698	1.28797	1.18941	1.20939	1.21598	1.2141	1.15041	1.07026	1.29679	1.21033	1.27729	1.1942	1.18268	0.926257	0.995136	0.870375	1.58952	1.45825	1.34551	1.46957	1.20694	1.25806	1.26507	1.12544	1.29187	1.47483	1.2206	1.4214	0.575824		5.66667	0.233047	0.23518	0.234724	0.231562	0.21877	0.222862	0.220221	0.214998	0.227345	0.222164	0.261401	0.240436	0.254571	0.243462	0.253474	0.233929
6	1.45438	1.35362	1.44256	1.36536	1.26473	1.28531	1.28974	1.27997	1.2309	1.15239	1.37701	1.28264	1.35108	1.26833	1.25658	1.00085	1.0777	0.944552	1.66558	1.54438	1.41517	1.54008	1.27637	1.32731	1.33479	1.19775	1.35451	1.5451	1.29015	1.48974	0.644648		6	0.227279	0.230335	0.228639	0.227	0.212757	0.217379	0.214516	0.209804	0.221586	0.217841	0.255111	0.239163	0.253417	0.241762	0.249013	0.233062
6.33333	1.53007	1.43145	1.52185	1.44493	1.33921	1.36536	1.36536	1.34686	1.30556	1.22346	1.46064	1.36118	1.42826	1.34431	1.33152	1.07875	1.15437	1.01219	1.73895	1.62596	1.48603	1.61025	1.34222	1.39709	1.39867	1.26768	1.40262	1.61436	1.36021	1.5501	0.69577		6.33333	0.221262	0.225706	0.222692	0.222694	0.2073	0.213299	0.209553	0.207175	0.216856	0.210391	0.252808	0.232477	0.246626	0.234778	0.234437	0.232457
6.66667											1.55081	1.43702	1.50602	1.41461	1.40652	1.15338	1.24381	1.08087	1.80812	1.70817	1.55295	1.68406	1.39788	1.46731	1.4643	1.34715	1.47483	1.68603	1.42296	1.61299	0.758107		6.66667	0.214526	0.221634	0.216419	0.218314	0.201446	0.208417	0.205174	0.206009	0.211729	0.203295	0.250876	0.230521	0.244409	0.230695	0.226793	0.229223
7	1.67529	1.57635	1.67665	1.59791	1.47076	1.51056	1.5045	1.48773	1.45045	1.35698	1.64505	1.51959	1.59219	1.49843	1.48466	1.23367	1.32206	1.14544	1.88474	1.78598	1.62051	1.74972	1.47108	1.52856	1.52928	1.41282	1.53865	1.75603	1.4823	1.68077	0.818399		7	0.208965	0.217545	0.21016	0.21352	0.195294	0.20341	0.200328	0.20513	0.206157	0.196801	0.248613	0.228581	0.24314	0.226926	0.222079	0.227773
7.33333	1.74925	1.65197	1.7401	1.66641	1.53899	1.57707	1.57417	1.55961	1.51584	1.42265	1.72957	1.60076	1.68005	1.57924	1.55888	1.30731	1.40083	1.21504	1.95441	1.87416	1.69322	1.81423	1.54152	1.60199	1.59091	1.48826	1.61299	1.82697	1.54295	1.74085	0.879585		7.33333	0.202393	0.21246	0.203694	0.209312	0.188264	0.19709	0.195803	0.204021	0.201224	0.190907	0.244068	0.225889	0.241745	0.222945	0.218042	0.225477
7.66667	1.81644	1.72363	1.8051	1.73747	1.59577	1.64019	1.64019	1.62482	1.57635	1.48158	1.81519	1.67801	1.76289	1.65404	1.62622	1.39021	1.47463	1.29151	2.0184	1.95328	1.76356	1.88415	1.61025	1.67352	1.65893	1.5657	1.67682	1.89235	1.60337	1.80323	0.940316		7.66667	0.195144	0.206427	0.195802	0.203796	0.181546	0.189415	0.189624	0.202019	0.196029	0.184913	0.237065	0.222363	0.240127	0.219257	0.213851	0.223179
8	1.87759	1.78412	1.86479	1.80067	1.65335	1.70097	1.69627	1.69156	1.64505	1.53751	1.89092	1.75121	1.84263	1.72957	1.69963	1.46064	1.54786	1.36369	2.07988	2.03095	1.82273	1.95045	1.67485	1.73704	1.72106	1.63815	1.73831	1.96006	1.65827	1.87121	1.00288		8	0.186779	0.199062	0.186789	0.198046	0.174688	0.179685	0.182957	0.199815	0.189948	0.177919	0.230126	0.217325	0.238503	0.215361	0.209811	0.219607
8.33333	1.93564	1.85005	1.925	1.85989	1.711	1.76354	1.75576	1.7616	1.70499	1.60148	1.96314	1.82584	1.92144	1.80004	1.77515	1.53751	1.62271	1.43543	2.1458	2.09682	1.88826	2.01017	1.74529	1.79647	1.77792	1.70558	1.80384	2.02441	1.71592	1.92707	1.05759		8.33333	0.178318	0.192424	0.178001	0.191693	0.168217	0.169729	0.17581	0.196212	0.184709	0.171718	0.222104	0.21067	0.23501	0.210612	0.204601	0.214704
8.66667	1.99199	1.9149	1.9805	1.92203	1.76354	1.81644	1.81393	1.82896	1.76419	1.65335	2.03617	1.89814	1.99942	1.86785	1.84139	1.60929	1.68886	1.49919	2.20273	2.16987	1.94761	2.07669	1.81483	1.86529	1.83783	1.77418	1.85995	2.08042	1.76482	1.98081	1.10961		8.66667	0.170555	0.186444	0.171097	0.186465	0.164166	0.16085	0.170312	0.192397	0.181127	0.167319	0.212839	0.202875	0.230623	0.205655	0.199016	0.209545
9	2.05125	1.9782	2.04065	1.9805	1.81707	1.87029	1.86601	1.89393	1.82271	1.71234	2.10342	1.96373	2.07722	1.9321	1.90654	1.68073	1.75055	1.56764	2.2548	2.23708	2.01181	2.13184	1.87651	1.9196	1.90399	1.83843	1.92822	2.13288	1.82213	2.03421	1.17163		9	0.169832	0.187759	0.173231	0.187152	0.166426	0.161888	0.171598	0.192944	0.182359	0.168025	0.204115	0.194153	0.224766	0.199951	0.192922	0.202965
9.33333	2.10179	2.03897	2.09146	2.04958	1.86907	1.9143	1.92678	1.95558	1.88366	1.76548	2.17069	2.02381	2.14956	1.996	1.97126	1.74075	1.8133	1.63252	2.30809	2.30137	2.0735	2.18863	1.9368	1.97578	1.96625	1.91153	1.9875	2.19569	1.87061	2.07882	1.22331		9.33333	0.164975	0.186697	0.173012	0.186055	0.166433	0.159653	0.170068	0.191614	0.182403	0.167176	0.19746	0.185656	0.21889	0.195447	0.188158	0.196598
9.66667	2.15645	2.09473	2.15009	2.10776	1.92085	1.96547	1.97242	2.0108	1.94035	1.81707	2.22827	2.08161	2.22365	2.06068	2.02831	1.81015	1.86968	1.69761	2.36017	2.36485	2.12717	2.23412	2.00024	2.02714	2.0184	1.9769	2.03584	2.24891	1.9173	2.12197	1.27377		9.66667	0.160745	0.185109	0.172084	0.183595	0.166425	0.157888	0.168962	0.188724	0.18136	0.165361	0.192489	0.179551	0.214749	0.193044	0.184538	0.190503
10	2.20355	2.15009	2.19785	2.16701	1.97126	2.00683	2.02831	2.07503	1.99542	1.86662	2.29486	2.14265	2.29535	2.12393	2.09091	1.87151	1.92796	1.77064	2.40563	2.418	2.17241	2.28692	2.04937	2.07136	2.07403	2.03801	2.0836	2.31048	1.96569	2.16783	1.32147		10	0.156073	0.183072	0.170142	0.180547	0.1649	0.155246	0.166694	0.184172	0.178113	0.161889	0.189339	0.174753	0.211136	0.191359	0.181557	0.18646
10.3333	2.25524	2.20562	2.24713	2.22263	2.02268	2.05736	2.07887	2.1309	2.05458	1.91549	2.35666	2.19733	2.36005	2.18379	2.14425	1.92855	1.98281	1.83394	2.44934	2.47448	2.2242	2.33853	2.10261	2.12249	2.12977	2.09577	2.13236	2.36251	2.01456	2.20373	1.3667		10.3333	0.150431	0.179047	0.166759	0.175318	0.162911	0.152008	0.163198	0.178246	0.174018	0.156622	0.186343	0.170301	0.207142	0.190327	0.178708	0.181694
10.6667	2.31564	2.26936	2.31416	2.28888	2.08927	2.11208	2.14372	2.19733	2.12447	1.98165	2.4098	2.24662	2.42914	2.24561	2.20096	1.9897	2.03225	1.89212	2.49583	2.52838	2.27626	2.38162	2.15505	2.16783	2.17547	2.15453	2.17597	2.4148	2.0687	2.2435	1.40025		10.6667	0.143824	0.173585	0.162747	0.168972	0.15978	0.147692	0.157988	0.170613	0.168692	0.15089	0.182203	0.165982	0.202165	0.188356	0.176125	0.176948
11	2.37307	2.35376	2.39508	2.36102	2.16385	2.18692	2.21543	2.27388	2.19473	2.04568	2.46827	2.29635	2.49036	2.30626	2.25321	2.04009	2.08216	1.95558	2.5358	2.5833	2.31621	2.4212	2.21024	2.22022	2.22817	2.20373	2.2237	2.46508	2.10576	2.28257	1.45141		11	0.136264	0.167265	0.15658	0.160721	0.155029	0.142431	0.151796	0.161704	0.161724	0.143386	0.177493	0.161509	0.195783	0.185646	0.172242	0.172206
11.3333	2.41359	2.41548	2.44645	2.41831	2.21543	2.23542	2.26533	2.33282	2.25372	2.10125	2.53216	2.3455	2.55369	2.36922	2.31663	2.09636	2.14052	2.02212	2.58288	2.63624	2.36017	2.46508	2.26409	2.26946	2.28257	2.25969	2.26897	2.51436	2.14528	2.32003	1.49862		11.3333	0.127839	0.159828	0.149434	0.150926	0.148483	0.136416	0.144069	0.151705	0.152791	0.135398	0.172126	0.156549	0.188624	0.181803	0.167345	0.166962
11.6667	2.45669	2.46179	2.49357	2.46133	2.25979	2.28339	2.31515	2.37403	2.30032	2.13892	2.59842	2.41264	2.62898	2.44132	2.38027	2.15698	2.19992	2.09799	2.62784	2.69183	2.40425	2.51699	2.31526	2.32859	2.34703	2.32954	2.33001	2.56915	2.19217	2.36392	1.55579		11.6667	0.118129	0.151738	0.139694	0.14107	0.140404	0.128483	0.136269	0.141041	0.142954	0.126731	0.165752	0.150957	0.18031	0.17619	0.161709	0.160681
12	2.49173	2.50862	2.53306	2.50498	2.29833	2.3186	2.34988	2.41689	2.3382	2.17279	2.66176	2.47104	2.69583	2.50498	2.44505	2.22263	2.25625	2.15962	2.67908	2.75715	2.46149	2.56829	2.38023	2.38764	2.4093	2.39504	2.39412	2.64336	2.24989	2.4212	1.61025		12	0.108144	0.141835	0.129232	0.130285	0.131179	0.120305	0.126705	0.129121	0.131645	0.11682	0.157756	0.144322	0.171574	0.169014	0.154919	0.154311
12.3333	2.52313	2.54877	2.57017	2.53711	2.34356	2.35473	2.39031	2.45715	2.37643	2.20459	2.71607	2.52132	2.75444	2.56528	2.49722	2.27187	2.30379	2.21697	2.74107	2.84203	2.52751	2.64085	2.46508	2.47046	2.48606	2.47537	2.47626	2.72408	2.31526	2.49627	1.69061		12.3333	0.0976131	0.130881	0.117306	0.118836	0.120655	0.11076	0.116141	0.117188	0.119316	0.105846	0.15022	0.137237	0.162367	0.161064	0.14804	0.147669
12.6667	2.55325	2.58478	2.61113	2.57947	2.37979	2.37979	2.41925	2.48578	2.41595	2.23644	2.75775	2.56395	2.80452	2.61287	2.54474	2.31761	2.35376	2.27036	2.80602	2.91119	2.59398	2.69101	2.52969	2.54581	2.55145	2.55361	2.54798	2.80089	2.39042	2.55621	1.72811		12.6667	0.086903	0.118332	0.103867	0.106825	0.109001	0.101045	0.104201	0.104347	0.106727	0.0936592	0.14206	0.13006	0.15225	0.151645	0.139731	0.14035
13	2.5808	2.6229	2.63894	2.60763	2.41359	2.41122	2.45204	2.51498	2.44878	2.26382	2.79922	2.60106	2.84651	2.66176	2.58257	2.36392	2.3884	2.31663	2.84319	2.96088	2.63246	2.72692	2.58373	2.59185	2.5944	2.59483	2.57387	2.84824	2.43758	2.60164	1.74466		13	0.0772536	0.105821	0.0912451	0.0961253	0.0981596	0.0916063	0.093188	0.0929204	0.0954336	0.0834133	0.133242	0.121757	0.142323	0.142018	0.130743	0.133042
13.3333	2.60106	2.65575	2.66861	2.63808	2.44132	2.43991	2.4821	2.5425	2.47474	2.29187	2.8413	2.63678	2.88908	2.70765	2.61985	2.40127	2.42867	2.36729	2.87066	3.00534	2.65837	2.75594	2.61942	2.627	2.63036	2.62363	2.58715	2.88946	2.4776	2.64252	1.77231		13.3333	0.0693539	0.0960526	0.082234	0.0876537	0.0895935	0.0847951	0.0848568	0.0842161	0.0857264	0.074793	0.123857	0.113429	0.131891	0.131848	0.121145	0.12491
13.6667	2.62072	2.69117	2.68778	2.66647	2.4692	2.46411	2.51316	2.57194	2.50316	2.31958	2.87562	2.67245	2.9283	2.74448	2.65575	2.44085	2.46272	2.40743	2.89863	3.03461	2.68567	2.78546	2.65629	2.66128	2.66128	2.64001	2.61012	2.92444	2.50687	2.67329	1.7977		13.6667	0.0617001	0.0874315	0.0737769	0.0799229	0.0812444	0.0786435	0.0770487	0.0770415	0.077493	0.067624	0.115426	0.104314	0.121464	0.121836	0.11247	0.117047
14	2.64067	2.71649	2.71144	2.69202	2.49722	2.49357	2.53981	2.59755	2.52539	2.33917	2.90954	2.70259	2.96739	2.77795	2.69159	2.47566	2.49494	2.44878	2.92444	3.0553	2.71554	2.81232	2.68773	2.6943	2.69224	2.6646	2.64127	2.94778	2.53972	2.69471	1.82516		14	0.054478	0.0790499	0.0658153	0.0723616	0.0734789	0.0737992	0.0699755	0.0696793	0.0697947	0.0604257	0.10841	0.097189	0.113337	0.113148	0.10559	0.110027
14.3333	2.6609	2.7449	2.73449	2.71354	2.52132	2.51951	2.55905	2.62029	2.54833	2.35763	2.95004	2.73031	3.00294	2.81589	2.72822	2.51225	2.52494	2.4844	2.94778	3.07514	2.74107	2.8358	2.71351	2.72205	2.72124	2.6869	2.66916	2.97837	2.56096	2.72529	1.84803		14.3333	0.0478766	0.0709321	0.0579558	0.0651884	0.0657058	0.0685563	0.0625715	0.0628086	0.0616588	0.0531295	0.102147	0.091959	0.106456	0.105835	0.100691	0.10489
14.6667	2.67501	2.76312	2.75112	2.73407	2.5416	2.54429	2.5746	2.63678	2.56884	2.37018	2.98082	2.76354	3.03618	2.84651	2.75775	2.54564	2.55593	2.51996	2.9728	3.09413	2.76355	2.85947	2.7459	2.74952	2.74872	2.71188	2.69799	3.0035	2.58544	2.74912	1.88415		14.6667	0.0415527	0.062859	0.0507534	0.0574156	0.0586642	0.0633975	0.0554102	0.0570679	0.0538426	0.0462937	0.0972766	0.087484	0.100715	0.099937	0.0969441	0.100218
15	2.68523	2.78205	2.76519	2.75527	2.5586	2.56439	2.59095	2.6579	2.5861	2.3884	3.0162	2.78902	3.07019	2.88275	2.78697	2.57726	2.58566	2.55593	2.99391	3.11193	2.78546	2.87912	2.77513	2.77632	2.77473	2.72975	2.7188	3.02842	2.60418	2.77553	1.90921		15	0.0357305	0.0546871	0.0447536	0.0507794	0.0518664	0.0580428	0.0478595	0.0508253	0.046716	0.0396567	0.0921636	0.0831427	0.0953643	0.0941332	0.0936549	0.0962088
15.3333	2.69752	2.79678	2.78246	2.77137	2.57283	2.57903	2.60894	2.67288	2.59711	2.39794	3.04332	2.82115	3.10051	2.91268	2.81751	2.60807	2.61287	2.58522	3.01598	3.13282	2.80878	2.89634	2.79813	2.79853	2.8005	2.74872	2.74107	3.05168	2.62321	2.79971	1.93166		15.3333	0.0303139	0.0468833	0.038788	0.0439824	0.0454054	0.0527104	0.0408539	0.0448327	0.0403152	0.0335673	0.0866576	0.0792816	0.0898682	0.0886265	0.0903739	0.0922502
15.6667	2.70681	2.81021	2.7927	2.78041	2.58301	2.59447	2.62159	2.68608	2.61025	2.40649	3.07427	2.8433	3.12835	2.94191	2.84691	2.63981	2.63894	2.61898	3.03498	3.1462	2.82369	2.9127	2.8182	2.81192	2.82056	2.77034	2.75835	3.07262	2.64127	2.82095	1.95384		15.6667	0.0254045	0.0392634	0.0333216	0.0373593	0.0388512	0.0473448	0.0345327	0.0390035	0.0340377	0.0280433	0.0810666	0.0747807	0.0844694	0.083401	0.0866724	0.0879962
16	2.70976	2.82438	2.80045	2.79229	2.59842	2.61156	2.63028	2.69498	2.62072	2.41311	3.10161	2.86807	3.15956	2.96662	2.87919	2.66818	2.66604	2.64456	3.04879	3.16127	2.83736	2.9286	2.84047	2.8319	2.83151	2.78388	2.76955	3.09662	2.66086	2.83424	1.97242		16	0.0205164	0.0329221	0.0275327	0.0313545	0.0325995	0.0417923	0.0291667	0.0339298	0.0285885	0.0235772	0.0749893	0.0703444	0.079139	0.0776888	0.0829102	0.0841201
16.3333	2.71733	2.83285	2.80655	2.80045	2.60981	2.62116	2.63894	2.70344	2.62551	2.41831	3.11922	2.895	3.18259	2.9938	2.90679	2.69583	2.68905	2.67288	3.06578	3.17974	2.84941	2.94403	2.85754	2.84824	2.84785	2.79774	2.78586	3.11619	2.67949	2.85289	1.98916		16.3333	0.0163165	0.0268953	0.0223293	0.0260544	0.0273549	0.0369513	0.0248	0.029611	0.0234947	0.0198351	0.0683189	0.0657638	0.0741375	0.0713808	0.0791665	0.0802173
16.6667	2.7211	2.84049	2.81548	2.80614	2.61636	2.63028	2.6424	2.71565	2.63202	2.42679	3.14617	2.91463	3.20687	3.01923	2.93453	2.72194	2.71186	2.69752	3.07909	3.19396	2.8587	2.95826	2.87681	2.86025	2.86102	2.81192	2.79616	3.13105	2.6906	2.86565	1.99582		16.6667	0.0129732	0.0220623	0.0180894	0.0212029	0.022883	0.0326686	0.0208764	0.0260488	0.0190475	0.0166164	0.0624449	0.0611602	0.0693095	0.0650909	0.0754251	0.0758746
17	2.72404	2.84611	2.82074	2.81305	2.62203	2.64499	2.64671	2.72026	2.63548	2.42867	3.16677	2.93181	3.22779	3.04032	2.95661	2.7503	2.73323	2.72529	3.09019	3.20605	2.8722	2.96759	2.89023	2.87105	2.87489	2.8233	2.80602	3.1483	2.70535	2.88295	2.00301		17	0.0103619	0.0173676	0.0143407	0.0169325	0.0189692	0.028942	0.0170335	0.0226022	0.0154659	0.0134816	0.0563161	0.0567945	0.0643685	0.0586278	0.0711001	0.0713112
17.3333	2.72445	2.84891	2.82357	2.81751	2.62637	2.65274	2.65188	2.7278	2.6411	2.4343	3.18259	2.95468	3.24788	3.05753	2.9812	2.7689	2.74864	2.74656	3.1034	3.21741	2.87873	2.978	2.89634	2.88104	2.88564	2.82838	2.81271	3.16546	2.72327	2.89138	2.00962		17.3333	0.00665202	0.0112288	0.00948157	0.012887	0.0152058	0.0253798	0.0142035	0.0207169	0.0105924	0.0107297	0.0504767	0.0518133	0.0594036	0.0527427	0.0666583	0.0667869
17.6667	2.72989	2.85012	2.82478	2.81872	2.62855	2.65918	2.65704	2.73282	2.64412	2.4357	3.19654	2.96547	3.26609	3.07279	2.99989	2.78983	2.76643	2.76725	3.11158	3.22735	2.88946	2.98763	2.90663	2.89099	2.89367	2.83541	2.81781	3.17522	2.73339	2.9032	2.01456		17.6667	0.00541029	0.00826405	0.0076709	0.0109372	0.013041	0.0216272	0.011937	0.0178982	0.00845175	0.00908346	0.0447449	0.0474766	0.0547719	0.047157	0.0621221	0.0624573
18	2.72864	2.85412	2.82519	2.82196	2.63028	2.66561	2.65961	2.73782	2.64757	2.43804	3.21078	2.97929	3.28386	3.08576	3.02074	2.81224	2.78287	2.78164	3.11868	3.23932	2.89787	2.9965	2.91763	2.90092	2.90206	2.84047	2.82447	3.1853	2.74187	2.91498	2.01894		18	0.00428023	0.00571939	0.00579194	0.00859896	0.0105842	0.0190183	0.00998476	0.0161447	0.00696749	0.00752401	0.0397381	0.0424986	0.0498025	0.0419939	0.0572411	0.0584361
18.3333	2.73031	2.85492	2.8264	2.82519	2.63461	2.67202	2.66304	2.74323	2.6493	2.44225	3.22107	2.9938	3.30084	3.09757	3.03994	2.83325	2.7931	2.79882	3.12611	3.24715	2.90244	3.00497	2.92709	2.90929	2.90929	2.84475	2.82643	3.19431	2.74791	2.92331	2.02441		18.3333	0.00302731	0.00404027	0.00415208	0.00693253	0.00902642	0.0169415	0.00837287	0.0142168	0.00577828	0.00635487	0.0352655	0.0377864	0.0452803	0.036806	0.0524959	0.0540505
18.6667	2.73031	2.85691	2.82842	2.8268	2.63721	2.67714	2.66561	2.74864	2.64973	2.44319	3.23379	3.00977	3.3167	3.10676	3.05529	2.84571	2.80208	2.81345	3.13211	3.25769	2.90625	3.01195	2.93689	2.91839	2.9127	2.85134	2.83073	3.2026	2.75795	2.9286	2.02441		18.6667	0.00240517	0.00296017	0.00277543	0.00548582	0.00808634	0.0151196	0.00722006	0.0124066	0.00468418	0.00515115	0.0305389	0.0338905	0.0406735	0.0322843	0.0482265	0.0494056
19	2.73282	2.85571	2.82963	2.82761	2.63851	2.68012	2.66604	2.75195	2.65145	2.44365	3.2426	3.01998	3.32906	3.11776	3.06945	2.86011	2.81589	2.82801	3.1374	3.2665	2.90967	3.01671	2.9429	2.92407	2.91687	2.85599	2.83229	3.20915	2.76435	2.93726	2.03421		19	0.00191523	0.00237832	0.00212176	0.00440152	0.00711624	0.0130292	0.00583629	0.0108784	0.00390646	0.00433874	0.0266445	0.0298278	0.0363385	0.0283038	0.0443757	0.0448362
19.3333	2.71942	2.83446	2.81507	2.82074	2.63635	2.68098	2.67245	2.7623	2.63202	2.43851	3.24788	3.02678	3.33796	3.12653	3.08613	2.87602	2.82963	2.83969	3.14233	3.27495	2.9127	3.02294	2.94891	2.92897	2.92255	2.85909	2.83619	3.21363	2.77314	2.94215	2.03367		19.3333	0.00144676	0.00202266	0.00186209	0.00364032	0.00631346	0.0115551	0.00460274	0.0093454	0.00315156	0.00344979	0.0233225	0.0259083	0.032431	0.0247831	0.0405298	0.0405608
19.6667	2.73574	2.85811	2.83406	2.83406	2.64887	2.6814	2.67074	2.75278	2.65446	2.44692	3.25595	3.03543	3.35058	3.13527	3.09941	2.89184	2.83889	2.84771	3.1469	3.28337	2.91725	3.02659	2.95602	2.93425	2.92671	2.86295	2.8358	3.21878	2.78189	2.94628	2.03367		19.6667	0.00106769	0.00203619	0.00179576	0.00308032	0.00582537	0.0103395	0.00345675	0.00781249	0.00264036	0.0028482	0.0201015	0.0227766	0.0285698	0.0214735	0.0370661	0.0358185
20	2.7324	2.85691	2.83003	2.83003	2.64671	2.69202	2.66946	2.76147	2.65532	2.44599	3.2626	3.03881	3.35636	3.14254	3.1086	2.90522	2.84611	2.85651	3.15181	3.29077	2.91953	3.03097	2.96349	2.93764	2.93011	2.86642	2.83697	3.22461	2.79062	2.95265	2.03367		20	0.00113014	0.0019644	0.00157682	0.0023411	0.00525956	0.00906652	0.00279195	0.00629631	0.00239229	0.00219307	0.0169412	0.0196	0.0251253	0.0183738	0.0334216	0.0314341
20.3333	2.73198	2.85691	2.82963	2.83124	2.64844	2.69371	2.67074	2.76189	2.6536	2.44878	3.26749	3.04519	3.36248	3.1469	3.11593	2.91268	2.85332	2.8625	3.15567	3.29782	2.92369	3.03461	2.9661	2.94253	2.93275	2.87066	2.83775	3.22941	2.79655	2.95602	2.03584		20.3333	0.00112353	0.0021566	0.00147745	0.00176892	0.00433206	0.00792411	0.00210691	0.00495327	0.00235773	0.00152325	0.014203	0.0165739	0.0219514	0.0155604	0.0299315	0.0277349
20.6667	2.73323	2.85851	2.83003	2.83043	2.64973	2.69879	2.67202	2.76436	2.65446	2.44832	3.27202	3.05155	3.36858	3.15197	3.12799	2.91855	2.86011	2.86688	3.15777	3.30016	2.92558	3.0368	2.96945	2.94666	2.93463	2.87412	2.84008	3.23078	2.80287	2.96088	2.0391		20.6667	6.22779e-05	5.72982e-05	-6.68339e-05	0.000458562	0.00284519	0.00662653	0.00176067	0.0043405	0.000303777	0.000322445	0.0116078	0.0140493	0.019239	0.0129703	0.0268743	0.0246041
21	2.73282	2.85891	2.83084	2.83245	2.64844	2.69837	2.67117	2.76312	2.65489	2.44738	3.27446	3.05305	3.37399	3.15414	3.13673	2.92596	2.8625	2.87006	3.16127	3.30518	2.92747	3.04007	2.9754	2.95078	2.93651	2.87681	2.84086	3.23556	2.80681	2.96461	2.03747		21	0.000620096	0.00103393	0.000697912	0.000551809	0.00219756	0.00526233	0.00151359	0.00273817	0.000766656	0.000138288	0.00945172	0.012279	0.0171217	0.0104786	0.0237529	0.0216096
21.3333	2.73156	2.85771	2.83124	2.83205	2.64887	2.69879	2.67245	2.7656	2.65489	2.44785	3.2776	3.05753	3.38176	3.15667	3.14472	2.92986	2.86728	2.87681	3.16371	3.30919	2.9286	3.04371	2.97837	2.95527	2.93689	2.87912	2.84125	3.23898	2.81349	2.9687	2.03639		21.3333	0.000689805	0.00159616	0.00107796	0.000313074	0.00123065	0.00449827	0.000949974	0.00194007	0.00127231	-0.000268916	0.00773883	0.0108386	0.0152689	0.00846273	0.0207894	0.0186201
21.6667	2.73323	2.86011	2.83164	2.83205	2.65145	2.70132	2.6716	2.76436	2.65403	2.44738	3.27864	3.05977	3.38446	3.15811	3.15124	2.93336	2.86887	2.88117	3.16651	3.31286	2.93048	3.04516	2.98504	2.95864	2.94065	2.87989	2.84242	3.24	2.81506	2.97057	2.03801		21.6667	-0.000792635	-0.000399176	-0.000340687	-0.000957384	-0.000220487	0.00324633	0.0010134	0.00221941	-0.00045746	-0.0013155	0.00593146	0.00947683	0.0132857	0.00678748	0.0183064	0.0160602
22	2.73282	2.85971	2.83003	2.83124	2.65231	2.70132	2.67373	2.76478	2.65532	2.44738	3.27899	3.06424	3.39019	3.1592	3.15595	2.93997	2.87245	2.88434	3.16651	3.3152	2.93048	3.04588	2.98726	2.96088	2.94103	2.88142	2.84242	3.24307	2.8182	2.9728	2.03801		22	-0.000572256	4.30578e-05	8.49773e-05	-0.000930964	-0.000525786	0.00171502	0.000914913	0.00106762	-9.48654e-05	-0.00133058	0.00451361	0.00860626	0.0117761	0.00536288	0.0160441	0.0141121
22.3333	2.73407	2.85931	2.83164	2.83124	2.65059	2.70217	2.6733	2.76601	2.65532	2.44645	3.28038	3.0661	3.39288	3.16136	3.1592	2.94578	2.87443	2.88592	3.16895	3.31786	2.93124	3.04915	2.98763	2.96386	2.94215	2.88219	2.84319	3.24341	2.82369	2.97614	2.03964		22.3333	-0.000812971	0.000307624	2.58307e-05	-0.00109016	-0.000980188	0.000878233	0.000330664	0.000754803	0.000253594	-0.00150716	0.00341452	0.00731432	0.0100485	0.0044301	0.0138025	0.0126152
22.6667	2.72236	2.83607	2.8167	2.82155	2.64326	2.69921	2.67501	2.77178	2.63418	2.43758	3.28143	3.0687	3.3959	3.16245	3.16425	2.94927	2.87602	2.88987	3.16895	3.32385	2.93425	3.05168	2.99096	2.96908	2.94516	2.88372	2.84319	3.24579	2.82486	2.978	2.03856		22.6667	-0.000915854	0.000236726	8.6271e-05	-0.00120295	-0.00134946	0.000208958	-7.75152e-05	0.000135857	0.000446173	-0.00118406	0.00267832	0.00639369	0.00840755	0.00385552	0.0116312	0.0112136
23	2.73741	2.8617	2.83607	2.83325	2.65016	2.6971	2.67501	2.76023	2.65661	2.44599	3.28108	3.07019	3.39926	3.16353	3.16641	2.95545	2.87919	2.89224	3.17174	3.32751	2.93388	3.05096	2.99539	2.97057	2.94328	2.88525	2.84358	3.24818	2.82955	2.97948	2.03856		23	-0.00112927	0.000376408	4.70669e-05	-0.00126247	-0.00142038	2.79374e-05	-8.44875e-05	-4.75314e-05	0.000745018	-0.00113028	0.00211551	0.00561772	0.00689747	0.00343164	0.00993013	0.00982214
23.3333	2.73073	2.85971	2.83205	2.83003	2.64757	2.70301	2.67288	2.76643	2.65618	2.44365	3.28316	3.07168	3.40127	3.16497	3.17001	2.95699	2.87959	2.89303	3.17139	3.32884	2.93501	3.05168	2.99539	2.97317	2.94403	2.88449	2.84475	3.24886	2.83229	2.98096	2.03639		23.3333	-0.00128753	0.000726591	-1.87565e-05	-0.00108954	-0.001612	-0.000257599	-0.000549	-0.000537135	0.0011076	-0.000945527	0.00167351	0.00468864	0.0054235	0.00295485	0.00846185	0.00869075
23.6667	2.73031	2.85931	2.83124	2.82801	2.64671	2.7009	2.67288	2.76766	2.65704	2.44319	3.28282	3.07316	3.40161	3.16605	3.17217	2.95892	2.87998	2.89381	3.17313	3.33017	2.93576	3.05349	2.9965	2.9754	2.94516	2.88525	2.84552	3.24954	2.83385	2.98356	2.03693		23.6667	-0.00153527	0.000925453	-8.46397e-05	-0.0010031	-0.0018251	-0.00059191	-0.000760064	-0.000815903	0.00144185	-0.000830237	0.00139824	0.00385333	0.00447903	0.00268646	0.00737853	0.00728167
24	2.73031	2.8605	2.83043	2.8268	2.64542	2.7009	2.6733	2.76519	2.65618	2.44459	3.28316	3.07576	3.40228	3.16497	3.17325	2.96046	2.88196	2.895	3.17243	3.33182	2.93501	3.05494	2.99834	2.97651	2.94441	2.88679	2.84552	3.25192	2.83463	2.98245	2.03258		24	-0.00167319	0.00113086	-1.0965e-05	-0.000863515	-0.00165487	-0.000877737	-0.00137971	-0.00138061	0.00147865	-0.000530141	0.00114026	0.00300634	0.00341929	0.00234114	0.00654196	0.00574052
24.3333	2.72864	2.8605	2.82963	2.82842	2.64585	2.69879	2.67032	2.7656	2.65532	2.44365	3.28316	3.07427	3.40194	3.16641	3.17505	2.96085	2.88354	2.89618	3.17243	3.33415	2.93689	3.05494	2.99945	2.97614	2.94403	2.88564	2.84358	3.25362	2.83385	2.98578	2.03258		24.3333	-0.00172146	0.00133628	-0.000269679	-0.000637356	-0.00134288	-0.00111483	-0.00142894	-0.00186369	0.00169254	-6.84782e-05	0.000802089	0.00239943	0.00270989	0.00194251	0.00572552	0.0044766
24.6667	2.72989	2.85771	2.83124	2.82721	2.64456	2.69963	2.67074	2.76271	2.65575	2.44505	3.28455	3.0765	3.40329	3.16893	3.17828	2.96239	2.88434	2.89736	3.17383	3.33481	2.93689	3.05567	3.00018	2.98022	2.94365	2.88602	2.84397	3.25633	2.8393	2.98541	2.03367		24.6667	-0.00174289	0.00153514	-0.000322462	-0.000497786	-0.00103053	-0.00124064	-0.00163316	-0.00219725	0.00182143	0.000200873	0.000584332	0.0018418	0.00202329	0.00174014	0.00494561	0.0035394
25	2.72697	2.85811	2.83003	2.82801	2.64542	2.69963	2.6733	2.76436	2.65618	2.44225	3.28386	3.07576	3.40429	3.16821	3.17936	2.96393	2.88473	2.89736	3.17383	3.3368	2.93689	3.05675	3.00166	2.98059	2.94253	2.88832	2.84514	3.25633	2.83852	2.98689	2.03476		25	-0.00300526	-0.000835325	-0.00216659	-0.00157606	-0.0016564	-0.00174976	-0.00176751	-0.00178357	-0.00043197	-0.000400098	0.000360919	0.001297	0.00154729	0.00152009	0.00430404	0.00270501
25.3333	2.72697	2.85971	2.82882	2.82761	2.64499	2.69921	2.66989	2.76271	2.65661	2.44365	3.28421	3.0765	3.40429	3.16785	3.18008	2.96547	2.88513	2.89775	3.17522	3.3358	2.93689	3.05711	3.0035	2.98282	2.94365	2.88908	2.84242	3.25769	2.84047	2.98578	2.0315		25.3333	-0.00239346	-0.000888257	-0.00190176	-0.00141072	-0.00136545	-0.00256585	-0.00175398	-0.00251894	-0.000354068	-8.46505e-05	3.43692e-05	0.000954145	0.00119345	0.00147809	0.00373378	0.00229793
25.6667	2.72655	2.85971	2.82801	2.8264	2.64369	2.69837	2.67074	2.76189	2.65661	2.44178	3.28386	3.07613	3.40563	3.16929	3.18187	2.9647	2.88631	2.89775	3.17487	3.33779	2.93614	3.0582	3.00239	2.98245	2.94553	2.88832	2.84319	3.25667	2.84125	2.98948	2.02877		25.6667	-0.0024353	-0.00126367	-0.00242857	-0.00147771	-0.00128035	-0.00276941	-0.00192338	-0.00258068	-0.00056661	-7.66271e-06	-0.000114553	0.000556488	0.000977937	0.0013948	0.00344817	0.00180872
26	2.72487	2.85731	2.82842	2.826	2.64369	2.69583	2.66732	2.75982	2.65489	2.44319	3.28386	3.0765	3.4053	3.16893	3.18294	2.96508	2.88592	2.89854	3.17557	3.33845	2.93764	3.05603	3.00239	2.98171	2.94553	2.88717	2.84397	3.25769	2.84047	2.98911	2.02932		26	-0.00249799	-0.00161933	-0.00259533	-0.0016043	-0.00132334	-0.00303534	-0.00226247	-0.0025478	-0.00067299	-8.4596e-05	-0.000429645	0.00018343	0.000674051	0.00122859	0.00292105	0.00151008
26.3333	2.72487	2.85731	2.8264	2.8268	2.64283	2.69541	2.66989	2.75941	2.65532	2.44412	3.28351	3.0765	3.40563	3.16893	3.18294	2.96547	2.88552	2.89893	3.17418	3.33878	2.93651	3.05567	3.00313	2.98319	2.94591	2.88793	2.84125	3.25735	2.84086	2.988	2.02768		26.3333	-0.00247804	-0.00204814	-0.00293546	-0.00189733	-0.0013234	-0.00306393	-0.00233369	-0.00275318	-0.000892725	-0.000138523	-0.000710381	7.33938e-05	0.000436489	0.000872325	0.00245301	0.00118
26.6667	2.72236	2.85731	2.826	2.82519	2.64326	2.69456	2.66818	2.75858	2.65446	2.44272	3.28386	3.07687	3.4053	3.17001	3.18402	2.96624	2.88552	2.89893	3.17487	3.33845	2.93689	3.05603	3.00276	2.98282	2.94441	2.88793	2.84242	3.25667	2.84242	2.988	2.02714		26.6667	-0.0023886	-0.00245752	-0.00342246	-0.00187092	-0.00128802	-0.00327381	-0.00270075	-0.00271329	-0.00114074	-0.000300203	-0.000951006	-0.000201768	0.000121554	0.000741619	0.00190858	0.000913284
27	2.72152	2.85811	2.82438	2.82317	2.6411	2.69286	2.66604	2.75817	2.65489	2.44365	3.28316	3.07576	3.40597	3.17001	3.18366	2.96662	2.88513	2.89972	3.17418	3.33812	2.93614	3.0553	3.00386	2.98282	2.94328	2.88717	2.84242	3.25905	2.84047	2.99022	2.02277		27	-0.00214087	-0.00302459	-0.00375073	-0.00191098	-0.00135218	-0.00333755	-0.00295518	-0.00304834	-0.0013676	-0.000169398	-0.00116318	-0.000201762	-0.000149125	0.000818735	0.00149478	0.000754533
27.3333	2.72278	2.85532	2.82438	2.82236	2.64197	2.69117	2.66604	2.75775	2.65575	2.44412	3.28282	3.07724	3.40496	3.17181	3.18509	2.96662	2.88631	2.89893	3.17348	3.33812	2.93538	3.05639	3.0046	2.98208	2.94403	2.88679	2.84203	3.25871	2.84125	2.98874	2.02004		27.3333	-0.00192694	-0.0034204	-0.00413924	-0.00187807	-0.00132401	-0.00340186	-0.00312668	-0.00315914	-0.00167983	-0.000454287	-0.00139825	-0.000311805	-0.000314828	0.00070007	0.00127591	0.000722709
27.6667	2.72152	2.85332	2.81912	2.82196	2.64153	2.68947	2.66518	2.75692	2.65317	2.44412	3.28247	3.07613	3.40496	3.17109	3.18688	2.96585	2.8871	2.90011	3.17383	3.33978	2.93651	3.05639	3.00239	2.98245	2.9429	2.88564	2.84125	3.25803	2.84086	2.98985	2.02168		27.6667	-0.00164402	-0.00361261	-0.00445428	-0.00183856	-0.00119609	-0.00331249	-0.00337468	-0.00345446	-0.00182198	-0.000600643	-0.00150727	-0.000366836	-0.000508158	0.000533901	0.000986263	0.000646652
28	2.72026	2.85292	2.82155	2.82236	2.64024	2.68905	2.66219	2.75485	2.65274	2.44319	3.28108	3.07539	3.40429	3.17001	3.18474	2.96701	2.88631	2.89933	3.17383	3.33878	2.93651	3.05494	3.00313	2.98282	2.94253	2.88564	2.83852	3.25701	2.84125	2.99096	2.01785		28	-0.00145798	-0.00357408	-0.00457566	-0.00163881	-0.00108224	-0.00324435	-0.00365222	-0.00361992	-0.00209223	-0.000908657	-0.00170236	-0.000403511	-0.00063526	0.000302552	0.000696841	0.000576863
28.3333	2.71942	2.84972	2.81912	2.82115	2.6411	2.68947	2.66261	2.7532	2.65188	2.44178	3.28073	3.07539	3.40463	3.17001	3.18617	2.96624	2.88592	2.89972	3.17383	3.33878	2.93689	3.05422	3.0035	2.98022	2.94178	2.88525	2.8393	3.25972	2.83969	2.98948	2.0173		28.3333	-0.00141	-0.00377946	-0.00441718	-0.00159249	-0.000861574	-0.00333664	-0.00399926	-0.00401095	-0.00230527	-0.00121689	-0.0020641	-0.000421857	-0.000784462	0.000100862	0.00058461	0.00046273
28.6667	2.72026	2.84811	2.8167	2.82155	2.64024	2.6882	2.66133	2.7532	2.65188	2.44132	3.28073	3.07539	3.40463	3.17145	3.18545	2.96739	2.88513	2.90011	3.17383	3.3411	2.93839	3.05458	3.00239	2.97985	2.94328	2.88602	2.83969	3.25735	2.84047	2.98985	2.01346		28.6667	-0.00127915	-0.00387959	-0.00432516	-0.0013731	-0.000897345	-0.00319788	-0.00404386	-0.0040598	-0.0024263	-0.00138661	-0.00217327	-0.000415746	-0.000911619	-4.74475e-05	0.000383813	0.000202812
29	2.71901	2.84771	2.81426	2.82115	2.63981	2.68693	2.66047	2.75071	2.65102	2.44225	3.27899	3.07576	3.40396	3.17145	3.18474	2.96778	2.88552	2.89893	3.17209	3.33779	2.93614	3.05313	3.00386	2.98022	2.94065	2.88487	2.83697	3.25599	2.8393	2.98985	2.00962		29	-0.00126545	-0.00385468	-0.00408644	-0.00128022	-0.000804964	-0.00276474	-0.00420175	-0.00421167	-0.00275348	-0.00157153	-0.00221955	-0.000489204	-0.0010443	-0.000136407	0.000188982	2.53247e-05
29.3333	2.72026	2.84731	2.81224	2.81993	2.63894	2.6848	2.65661	2.74905	2.64887	2.44085	3.27864	3.07539	3.40396	3.17073	3.18653	2.96816	2.88513	2.89972	3.17139	3.33911	2.93425	3.05349	3.00202	2.97948	2.94215	2.88564	2.83541	3.25599	2.83891	2.99059	2.01236		29.3333	-0.00130704	-0.00355307	-0.0039145	-0.0012537	-0.000833471	-0.0028503	-0.0043023	-0.00430924	-0.00289628	-0.00185713	-0.00226583	-0.000562584	-0.000967023	-0.000338089	-0.000171209	-6.34032e-05
29.6667	2.71984	2.84571	2.81142	2.81912	2.63937	2.68438	2.65704	2.74656	2.64887	2.44038	3.27864	3.07502	3.40362	3.17109	3.18617	2.96662	2.88434	2.89815	3.17313	3.33945	2.93576	3.05241	3.00092	2.97985	2.94027	2.88525	2.83541	3.25939	2.83813	2.99022	2.00907		29.6667	-0.001169	-0.00336308	-0.00346205	-0.00139399	-0.000847889	-0.00276702	-0.00409139	-0.0042908	-0.00257756	-0.00205049	-0.00230648	-0.00047705	-0.00117167	-0.000320327	-0.000301079	-0.000221881
30	2.71817	2.84571	2.81142	2.82074	2.63981	2.68268	2.6536	2.74614	2.64628	2.44038	3.27725	3.07539	3.40261	3.16929	3.18509	2.96778	2.88394	2.89854	3.17139	3.33978	2.93463	3.05241	3.00313	2.97911	2.94027	2.88334	2.83307	3.25701	2.83813	2.9917	2.00907		30	-0.00103078	-0.00298722	-0.0034964	-0.00176148	-0.000876558	-0.0026904	-0.00371749	-0.00414919	-0.00220842	-0.00213602	-0.00219212	-0.000538268	-0.00118832	-0.000272865	-0.000360202	-0.000450098
30.3333	2.71733	2.8437	2.81102	2.81872	2.64024	2.6814	2.65403	2.74365	2.64714	2.43851	3.27446	3.07502	3.40228	3.17001	3.18617	2.96739	2.88434	2.90011	3.16999	3.33911	2.93237	3.04951	3.00313	2.97763	2.9399	2.88219	2.83268	3.25701	2.83658	2.99096	2.00741		30.3333	-0.000795564	-0.00261825	-0.00294962	-0.00186195	-0.000976386	-0.00267008	-0.00365484	-0.00394528	-0.00199569	-0.00226011	-0.00222696	-0.000893278	-0.00137641	-0.000474579	-0.000537325	-0.000691081
30.6667	2.71691	2.8425	2.8098	2.81832	2.63808	2.68183	2.65188	2.7449	2.64628	2.43804	3.27586	3.07502	3.40161	3.17073	3.18581	2.96585	2.88513	2.89893	3.17069	3.33845	2.93237	3.05023	3.00166	2.97688	2.93802	2.88142	2.83073	3.25735	2.8358	2.9917	2.00411		30.6667	-0.000629484	-0.00236087	-0.00239542	-0.00212936	-0.000962287	-0.00254505	-0.0032664	-0.00374797	-0.00191805	-0.00247668	-0.00218718	-0.00105851	-0.00143737	-0.000581345	-0.000537333	-0.00097008
31	2.71733	2.8413	2.80899	2.81751	2.63808	2.68353	2.64973	2.7424	2.64369	2.43851	3.27481	3.07353	3.40127	3.17037	3.18509	2.96585	2.88552	2.89854	3.17034	3.33812	2.92973	3.04879	3.00129	2.97763	2.93915	2.88027	2.8319	3.25599	2.83346	2.99059	2.0019		31	-0.000477315	-0.00224888	-0.00196117	-0.00229015	-0.00105511	-0.00231447	-0.00283522	-0.00337966	-0.00169123	-0.00268562	-0.00203265	-0.00123603	-0.00147074	-0.000510174	-0.000690889	-0.00103984
31.3333	2.71691	2.84049	2.80736	2.81791	2.63851	2.67842	2.64973	2.74074	2.64326	2.4357	3.27412	3.07427	3.40194	3.16929	3.18402	2.96624	2.88513	2.90011	3.16999	3.33945	2.93086	3.04915	3.00055	2.97948	2.93764	2.8795	2.82994	3.25599	2.83346	2.99096	2.00024		31.3333	-0.000338904	-0.00199126	-0.00151965	-0.00233736	-0.00111937	-0.00230157	-0.00224077	-0.00303118	-0.00124381	-0.00267107	-0.0019583	-0.00155463	-0.00141001	-0.000474626	-0.000885765	-0.00109066
31.6667	2.71649	2.83969	2.80736	2.81629	2.63721	2.6797	2.65016	2.73949	2.64499	2.43477	3.27307	3.0739	3.3996	3.16929	3.18474	2.96547	2.88394	2.90011	3.1693	3.3368	2.9286	3.04733	3.00018	2.97614	2.93764	2.87835	2.82916	3.25701	2.83424	2.98948	2.00135		31.6667	-4.14444e-05	-0.00144235	-0.00120505	-0.00249143	-0.00134057	-0.00228812	-0.00202145	-0.00268924	-0.000938241	-0.00277231	-0.00175754	-0.00179359	-0.00133275	-0.000581495	-0.000809041	-0.000989293
32	2.71691	2.8413	2.80574	2.81345	2.63678	2.6797	2.65016	2.73866	2.64671	2.4343	3.27342	3.07316	3.4006	3.17001	3.1833	2.96547	2.88354	2.89972	3.16965	3.33945	2.92709	3.04806	3.00018	2.97354	2.93839	2.87835	2.82838	3.25497	2.83229	2.99059	1.99693		32	0.000532623	-0.00113814	-0.000910472	-0.00258524	-0.00130495	-0.00241551	-0.00146872	-0.00259404	-0.000391002	-0.00260287	-0.0016432	-0.00188551	-0.00123337	-0.00055782	-0.000720489	-0.000919506
32.3333	2.71859	2.83969	2.80655	2.81426	2.63678	2.67799	2.64801	2.73866	2.64456	2.43336	3.27202	3.07056	3.39892	3.16857	3.18402	2.96393	2.88275	2.89893	3.16999	3.33812	2.92747	3.04733	3.00055	2.97466	2.93764	2.8772	2.82838	3.25531	2.83307	2.98911	2.0008		32.3333	0.000601865	-0.000853929	-0.000354789	-0.0022316	-0.00128375	-0.00266922	-0.00138393	-0.00218966	-0.000227424	-0.00237186	-0.00160345	-0.00191021	-0.00118924	-0.000723989	-0.000779568	-0.000761045
32.6667	2.71859	2.84009	2.80696	2.81264	2.63635	2.67672	2.64844	2.73782	2.64283	2.43242	3.27168	3.07168	3.39892	3.16929	3.18402	2.96393	2.88315	2.89972	3.16895	3.33878	2.9286	3.04625	2.99981	2.97354	2.93764	2.87489	2.82682	3.25362	2.8319	2.98837	1.99859		32.6667	0.000574233	-0.000602502	2.01521e-05	-0.00200462	-0.00103433	-0.00321866	-0.000958381	-0.00199773	5.69556e-05	-0.00227969	-0.00177606	-0.00182463	-0.00113405	-0.000777418	-0.00077971	-0.000507407
33	2.71733	2.83889	2.80655	2.81183	2.63548	2.67714	2.64801	2.73699	2.64283	2.43148	3.27133	3.07093	3.39825	3.16929	3.18294	2.96431	2.88275	2.89815	3.16895	3.33911	2.92709	3.04733	2.99871	2.97205	2.93764	2.87758	2.82565	3.25531	2.83268	2.98837	1.99471		33	0.000650307	-0.00041718	0.000261242	-0.00174424	-0.00112009	-0.00332486	-0.000724241	-0.00140777	0.000405344	-0.00217989	-0.00168441	-0.00178209	-0.00107327	-0.000741882	-0.000673459	-0.000501084
33.3333	2.71817	2.83929	2.80777	2.81183	2.63548	2.67458	2.64844	2.73699	2.64456	2.43101	3.27098	3.06833	3.39892	3.16857	3.18294	2.96354	2.88157	2.89736	3.16651	3.33845	2.92558	3.04588	2.99834	2.97168	2.93839	2.87566	2.82604	3.25396	2.83151	2.988	1.99471		33.3333	0.000850833	-0.000238394	0.000642955	-0.00137675	-0.000870392	-0.0031578	-0.000795319	-0.00126406	0.000582998	-0.00195675	-0.00169049	-0.00178224	-0.00107894	-0.000724151	-0.000839101	-0.000418629
33.6667	2.71817	2.8413	2.80777	2.81061	2.63418	2.67501	2.64714	2.73657	2.64456	2.42961	3.27133	3.06833	3.39825	3.16749	3.1833	2.96393	2.88236	2.89775	3.16755	3.33845	2.92709	3.04697	2.99945	2.97205	2.93614	2.87489	2.82408	3.25294	2.83151	2.98763	1.99083		33.6667	0.000650242	-0.000172157	0.000663091	-0.000989422	-0.000877824	-0.00370783	-0.000596472	-0.000803885	0.000646879	-0.00168631	-0.00168502	-0.00166619	-0.000857763	-0.000842928	-0.000898203	-0.000298149
34	2.7211	2.83969	2.80777	2.81061	2.63548	2.67245	2.64844	2.7349	2.64628	2.43101	3.26923	3.06907	3.39792	3.16785	3.1833	2.9647	2.88236	2.89736	3.16546	3.33812	2.92558	3.04516	2.99797	2.97057	2.93538	2.87489	2.82291	3.2526	2.83073	2.98689	1.99416		34	0.00050494	-0.000145646	0.000750181	-0.000789189	-0.000720841	-0.00362415	-0.000326651	-0.00039857	0.000881432	-0.0014622	-0.00178308	-0.00142756	-0.000924241	-0.000837002	-0.00107574	-0.00022204
34.3333	2.71817	2.83848	2.8098	2.81183	2.63418	2.67117	2.64628	2.73657	2.64499	2.43007	3.26854	3.06833	3.39758	3.16749	3.18259	2.96393	2.88236	2.89697	3.16441	3.34044	2.92558	3.04516	2.99539	2.96982	2.93501	2.87566	2.82095	3.25362	2.83424	2.98615	1.99305		34.3333	0.000318164	9.93478e-05	0.000622864	-0.000722348	-0.000656643	-0.0037105	-2.84354e-05	-6.87773e-05	0.00126526	-0.00114516	-0.00175468	-0.00130541	-0.000680803	-0.000813372	-0.00138918	-0.00015229
34.6667	2.71817	2.83929	2.80818	2.81142	2.63505	2.66775	2.64801	2.73574	2.64499	2.42914	3.26819	3.0687	3.39725	3.16749	3.18151	2.9647	2.88077	2.89775	3.16651	3.33911	2.92369	3.04443	2.9965	2.96908	2.93576	2.87528	2.81977	3.2526	2.83034	2.98504	1.99305		34.6667	0.000290544	0.000410445	0.000616107	-0.000347873	-0.000413996	-0.00359177	9.23083e-05	0.000226672	0.00142159	-0.000897696	-0.00172032	-0.00146502	-0.000774982	-0.000849008	-0.00160225	-0.000222087
35	2.71984	2.83929	2.80777	2.81102	2.63332	2.66946	2.64757	2.73699	2.64628	2.4282	3.26819	3.06721	3.39725	3.16713	3.18223	2.96354	2.88157	2.89618	3.16441	3.33978	2.92482	3.04371	2.99502	2.9687	2.93576	2.87412	2.8186	3.25294	2.83229	2.98615	1.98916		35	0.000131482	0.000635555	0.000562517	-0.000160579	-0.00019274	-0.00347997	0.000120736	0.000398491	0.0013574	-0.00063463	-0.0016572	-0.00142863	-0.000741805	-0.000831286	-0.00180954	-0.000355362
35.3333	2.7211	2.84009	2.8098	2.81183	2.63591	2.66818	2.64628	2.73407	2.64757	2.42726	3.26714	3.06721	3.39624	3.16677	3.17972	2.96393	2.88157	2.89539	3.16441	3.34044	2.92331	3.04298	2.99539	2.96833	2.93501	2.87335	2.82016	3.25226	2.83268	2.98393	1.98972		35.3333	0.000131424	0.000688486	0.000582452	3.34151e-05	-9.27866e-05	-0.00327017	0.000113657	0.000769384	0.00140659	-0.000472125	-0.00170357	-0.00116516	-0.000835974	-0.000712607	-0.00201079	-0.000418838
35.6667	2.71817	2.83969	2.80818	2.81061	2.63245	2.66433	2.64844	2.73782	2.64757	2.42914	3.26679	3.06647	3.39691	3.16605	3.18115	2.96354	2.88117	2.895	3.16301	3.34209	2.92293	3.04298	2.99244	2.96945	2.93425	2.87258	2.81663	3.25056	2.83151	2.98393	1.98694		35.6667	-3.4536e-05	0.000853898	0.000749692	0.000220722	0.000107083	-0.00314433	0.000291215	0.000920589	0.00177523	-0.000131564	-0.00169813	-0.00130015	-0.000797308	-0.000688932	-0.00209965	-0.000425167
36	2.71942	2.84009	2.80899	2.8094	2.63461	2.6669	2.64844	2.73824	2.64801	2.42867	3.26574	3.06684	3.3959	3.16677	3.17864	2.96354	2.88117	2.89815	3.16476	3.34176	2.92066	3.04262	2.99391	2.96721	2.93501	2.8722	2.81781	3.2509	2.83073	2.98356	1.9875		36	-0.000165912	0.00122454	0.000609124	0.000341094	0.000199876	-0.0029204	0.000312521	0.000955013	0.00186719	0.000193466	-0.00169876	-0.00121427	-0.00073644	-0.000766185	-0.00192822	-0.000501324
36.3333	2.71901	2.84049	2.80899	2.81021	2.63375	2.66304	2.64844	2.73824	2.64801	2.42914	3.26539	3.06535	3.39725	3.16569	3.17792	2.96316	2.87998	2.89539	3.16406	3.34209	2.91915	3.04262	2.99281	2.96647	2.93538	2.87181	2.81663	3.25056	2.83385	2.98393	1.98694		36.3333	0.00019365	0.00109222	0.000722777	0.000661902	0.000499609	-0.00261082	0.000454571	0.00109894	0.00177501	0.000688705	-0.0017797	-0.00125132	-0.000730958	-0.000683059	-0.00179835	-0.000539467
36.6667	2.71901	2.8429	2.8098	2.81183	2.63505	2.66433	2.64887	2.73782	2.64844	2.42867	3.26574	3.06424	3.39523	3.16605	3.1772	2.96316	2.88077	2.89539	3.16266	3.34143	2.92104	3.04225	2.99133	2.96647	2.93425	2.87258	2.81546	3.25056	2.83346	2.98282	1.98248		36.6667	0.000138335	0.00111851	0.000836612	0.000842513	0.000628053	-0.00217384	0.000170446	0.00128429	0.00173212	0.00105242	-0.00188368	-0.00119621	-0.000742088	-0.000706878	-0.00162699	-0.000615654
37	2.71775	2.8421	2.8094	2.81142	2.63505	2.66347	2.64757	2.73741	2.64887	2.42914	3.26539	3.06387	3.3959	3.16533	3.17613	2.96239	2.87998	2.895	3.16336	3.34408	2.9218	3.04225	2.9917	2.96721	2.93538	2.87143	2.81546	3.25124	2.8358	2.98282	1.98527		37	9.68371e-05	0.00106551	0.000870019	0.000989661	0.000856406	-0.00231557	0.000113652	0.00158589	0.00148342	0.00154726	-0.00207427	-0.00112898	-0.000703346	-0.000784233	-0.0013963	-0.00048875
37.3333	2.72068	2.8421	2.81102	2.81224	2.63461	2.66176	2.64757	2.74032	2.65102	2.42867	3.26365	3.06573	3.39489	3.16569	3.17613	2.96239	2.88077	2.895	3.16057	3.34507	2.92104	3.04044	2.99133	2.96498	2.93388	2.87181	2.81349	3.2509	2.83385	2.98208	1.98471		37.3333	0.000172938	0.00102568	0.000876557	0.00104986	0.000934749	-0.00185006	9.94651e-05	0.00177114	0.00153269	0.00192583	-0.00190738	-0.00123965	-0.000653543	-0.000867529	-0.00107109	-0.000304689
37.6667	2.71859	2.8433	2.81183	2.81224	2.63548	2.66133	2.64887	2.73866	2.6536	2.43054	3.2633	3.06387	3.39489	3.16497	3.17613	2.96354	2.88038	2.89381	3.16057	3.34408	2.92066	3.04044	2.99022	2.96721	2.93425	2.8722	2.8131	3.24988	2.83385	2.98356	1.98471		37.6667	0.0005601	0.000999154	0.000956885	0.00131726	0.0012344	-0.00147623	-0.00016335	0.00131768	0.00130566	0.00211082	-0.00178075	-0.00117841	-0.000470762	-0.000778419	-0.000893565	-0.000158705
38	2.71901	2.8437	2.8094	2.81305	2.63591	2.65961	2.64887	2.73824	2.65231	2.43195	3.26155	3.06535	3.39523	3.16461	3.1772	2.96239	2.88117	2.8946	3.16057	3.34507	2.91877	3.04044	2.99059	2.96647	2.9335	2.87258	2.81153	3.24818	2.83619	2.98208	1.97802		38	0.000394139	0.000899774	0.000695889	0.00138402	0.0010986	-0.00149749	-0.00019885	0.00126966	0.00102184	0.00254317	-0.00155609	-0.000969751	-0.000310152	-0.000766534	-0.000740078	-0.000120615
38.3333	2.72068	2.84089	2.81224	2.81548	2.63678	2.6609	2.64887	2.74157	2.64973	2.43242	3.26155	3.06275	3.39456	3.16533	3.17577	2.96162	2.87998	2.89342	3.16022	3.34705	2.92142	3.04116	2.98837	2.96535	2.9335	2.87258	2.81153	3.24988	2.83385	2.98208	1.98248		38.3333	0.000435658	0.000886325	0.000568753	0.00118994	0.001291	-0.00101039	-9.23233e-05	0.00149589	0.000858611	0.00285931	-0.00142937	-0.000890151	-0.00040434	-0.000493226	-0.000503303	1.26841e-05
38.6667	2.71984	2.84411	2.81061	2.81345	2.63678	2.66176	2.64714	2.74115	2.65231	2.43242	3.26085	3.06349	3.39422	3.16425	3.17577	2.96162	2.87919	2.89381	3.16057	3.34837	2.91839	3.03935	2.988	2.96684	2.93237	2.87258	2.81232	3.24954	2.83658	2.9843	1.97858		38.6667	0.000497882	0.000667963	0.000361327	0.00111616	0.00116961	-0.00073476	4.96979e-05	0.00170143	0.000496761	0.00309819	-0.00125651	-0.000853368	-0.000105281	-0.000356538	-0.000343464	0.000107906
39	2.72026	2.8433	2.81183	2.81386	2.63721	2.65833	2.64757	2.74407	2.65145	2.43523	3.2591	3.06238	3.39456	3.16317	3.17649	2.96239	2.87959	2.89303	3.15987	3.3487	2.91877	3.03789	2.98763	2.96498	2.93162	2.87181	2.81074	3.2492	2.83658	2.98319	1.97969		39	0.000567001	0.000509264	0.000454893	0.00116949	0.00129066	-0.000416878	0.000142026	0.00166008	0.000305132	0.00315145	-0.000928043	-0.00106839	-0.000110808	-0.000309025	-0.000444217	0.000203129
39.3333	2.71984	2.84411	2.81264	2.81386	2.63808	2.6609	2.64844	2.74282	2.65403	2.43617	3.2612	3.06126	3.39422	3.16281	3.17577	2.96393	2.87959	2.89303	3.16057	3.35233	2.9199	3.04007	2.98652	2.96572	2.93124	2.87143	2.80956	3.24647	2.83619	2.98319	1.98081		39.3333	0.000407897	0.000264557	0.000280937	0.00105575	0.00124067	7.77159e-05	9.23257e-05	0.00162527	9.2254e-05	0.00301955	-0.000593815	-0.00110519	-6.09603e-05	-0.000303083	-0.000467881	0.000323703
39.6667	2.72152	2.84411	2.81183	2.81548	2.63808	2.66004	2.64757	2.74074	2.65102	2.43664	3.26085	3.062	3.39624	3.16425	3.17613	2.96316	2.87879	2.89263	3.15882	3.352	2.9165	3.04007	2.98652	2.96572	2.92973	2.87335	2.81035	3.24886	2.83736	2.98134	1.97858		39.6667	0.000656723	0.000330622	0.00021408	0.00103557	0.00128307	0.000558127	7.10228e-05	0.00170069	6.39119e-05	0.00270202	-0.000345917	-0.00103173	-3.32484e-05	-0.000154514	-0.00047378	0.000450609
40	2.71942	2.84451	2.81061	2.81548	2.63808	2.65918	2.64757	2.74157	2.65102	2.43851	3.2612	3.06349	3.39523	3.16389	3.17361	2.96239	2.87721	2.89184	3.15637	3.35365	2.91801	3.03935	2.98578	2.96386	2.92973	2.87143	2.80917	3.24954	2.83852	2.98059	1.97242		40	0.000843046	0.000476098	0.000354558	0.000895151	0.00139675	0.000607684	0.000262726	0.0015838	0.000347532	0.00250057	-0.000161454	-0.00111166	-5.53651e-06	-6.53538e-05	-0.000639654	0.000748837
40.3333	2.72026	2.84571	2.81142	2.81507	2.63981	2.66047	2.64887	2.74448	2.65231	2.43945	3.2605	3.06126	3.39355	3.16533	3.17613	2.96316	2.87919	2.89184	3.15777	3.35299	2.91915	3.04007	2.98541	2.96461	2.92935	2.8695	2.80917	3.24784	2.83813	2.98208	1.97298		40.3333	0.000939629	0.000707493	0.000361062	0.000654634	0.00144635	0.000466387	0.000227226	0.00117211	0.000531904	0.00205278	-9.22448e-05	-0.00105673	9.41851e-05	-5.90435e-06	-0.000633818	0.000844008
40.6667	2.7211	2.84411	2.81102	2.81629	2.63851	2.66176	2.6493	2.74531	2.65102	2.43991	3.2605	3.06163	3.39557	3.16497	3.17577	2.96316	2.87919	2.89263	3.15602	3.35464	2.91801	3.03825	2.98541	2.96535	2.92935	2.8695	2.8076	3.24647	2.83852	2.98171	1.97522		40.6667	0.00122972	0.000409807	0.000615145	0.000814944	0.00144622	0.000749003	0.000298253	0.000870564	0.000397067	0.00140445	2.88697e-05	-0.00114894	8.31187e-05	0.000249635	-0.000621945	0.000920016
41	2.72152	2.8425	2.81345	2.8167	2.64024	2.66047	2.64844	2.74448	2.65274	2.44038	3.26085	3.05977	3.39456	3.16353	3.17361	2.96316	2.87721	2.89263	3.15602	3.35529	2.91953	3.03753	2.9843	2.96572	2.92747	2.86989	2.80681	3.24886	2.8393	2.98134	1.97186		41	0.00122971	0.000535429	0.00040784	0.000594489	0.00153138	0.000954001	0.000262722	0.000616933	0.000623877	0.000902513	-5.76571e-05	-0.00108762	-5.50795e-06	0.000309084	-0.000764162	0.000805743
41.3333	2.7211	2.8425	2.81183	2.81629	2.63937	2.66261	2.64844	2.74614	2.65274	2.43991	3.2605	3.06126	3.39422	3.16353	3.17505	2.96431	2.87879	2.89224	3.15602	3.35562	2.91801	3.03716	2.9843	2.96572	2.92784	2.87105	2.80681	3.24715	2.83813	2.97985	1.97242		41.3333	0.0012159	0.000614696	0.000521519	0.000500921	0.00142441	0.000664194	0.000454277	0.000562201	0.000793872	0.000694066	-8.07809e-05	-0.00107536	5.58091e-06	0.000273415	-0.000556835	0.000761293
41.6667	2.72236	2.84571	2.81142	2.8171	2.64153	2.66433	2.64887	2.74531	2.65274	2.44038	3.26085	3.05977	3.39489	3.16425	3.17505	2.9647	2.87919	2.89184	3.15742	3.35826	2.91763	3.03971	2.98504	2.96461	2.92671	2.8722	2.80484	3.24818	2.83969	2.98096	1.96906		41.6667	0.00122268	0.000608129	0.000575065	0.000353917	0.00133178	0.000614807	0.000851548	0.000452611	0.00136064	0.000547374	-1.15659e-05	-0.00120444	6.64946e-05	0.000237702	-0.000473886	0.000767679
42	2.72445	2.84571	2.81264	2.8167	2.6424	2.6609	2.64973	2.74614	2.65317	2.44132	3.26015	3.05939	3.39489	3.16425	3.17325	2.96547	2.8776	2.89224	3.15742	3.35892	2.91801	3.03862	2.98615	2.96572	2.92784	2.87143	2.80641	3.24681	2.84164	2.97985	1.97074		42	0.00146431	0.00069405	0.00081567	0.000500725	0.00125331	0.000621838	0.000858624	0.000239941	0.00156581	0.000323664	-8.07784e-05	-0.0012291	0.000193889	0.000392171	-0.000390979	0.000710593
42.3333	2.72404	2.84651	2.81426	2.81548	2.6424	2.6609	2.64757	2.7449	2.6536	2.43898	3.2605	3.05827	3.39523	3.16425	3.17325	2.96508	2.8784	2.89145	3.15567	3.36023	2.9165	3.03862	2.9843	2.96684	2.9286	2.87105	2.8072	3.24886	2.84086	2.98022	1.97018		42.3333	0.00142943	0.0010177	0.000935781	0.000634156	0.00104668	0.000473353	0.00102164	-4.7983e-05	0.00170008	-7.72404e-05	0.000115301	-0.00100808	0.000360057	0.000433751	-0.000622052	0.000532921
42.6667	2.72487	2.84491	2.81426	2.8171	2.64197	2.6639	2.64844	2.74323	2.6536	2.43758	3.26085	3.05865	3.39489	3.16533	3.17433	2.96624	2.87959	2.89303	3.15357	3.3599	2.91839	3.0368	2.98356	2.96572	2.92633	2.87181	2.80366	3.2475	2.84164	2.98096	1.97018		42.6667	0.000171128	-0.00106517	-0.000430411	-0.00030151	0.000619467	-0.000360979	0.00166649	0.000554158	-1.14547e-05	-0.00109655	1.1488e-05	-0.000983575	0.000315701	0.000606071	-0.000580668	0.000513837
43	2.72362	2.84611	2.81183	2.81589	2.64369	2.66261	2.6493	2.74448	2.65489	2.43991	3.25945	3.05865	3.39456	3.16461	3.17253	2.96508	2.87919	2.89224	3.15427	3.36089	2.91725	3.03716	2.98467	2.96759	2.92558	2.87181	2.80444	3.24818	2.8428	2.98022	1.96737		43	0.000598838	-1.16039e-06	0.000610642	0.000199011	0.000775492	-0.00075673	0.00187936	0.000232197	0.00047017	-0.000888063	9.22374e-05	-0.000848448	0.00052615	0.000831818	-0.00044443	0.000520077
43.3333	2.72362	2.84691	2.81386	2.8171	2.6424	2.66176	2.65145	2.74365	2.65575	2.44085	3.2619	3.05865	3.39523	3.16497	3.17469	2.96547	2.8784	2.89263	3.15602	3.36155	2.9165	3.03716	2.98393	2.96684	2.92595	2.87028	2.80326	3.2475	2.84242	2.97985	1.96737		43.3333	0.00068876	0.000231302	0.00119247	0.000299397	0.000782561	-0.00115236	0.00221227	0.000355584	0.0010723	-0.000679574	-4.62025e-05	-0.000965355	0.000598128	0.000784253	-0.000402922	0.000386822
43.6667	2.72487	2.84571	2.81264	2.8171	2.6424	2.66176	2.65317	2.74448	2.65747	2.44132	3.26085	3.0579	3.39624	3.16569	3.17397	2.9647	2.87879	2.89184	3.15532	3.36451	2.91801	3.03753	2.98615	2.96721	2.92558	2.87066	2.80405	3.24852	2.84475	2.97948	1.96625		43.6667	0.000599185	0.000384421	0.00161364	0.000413091	0.000533375	-0.0011027	0.00219097	0.000704964	0.00148341	-0.000517327	-5.7714e-05	-0.000848711	0.000592556	0.000724786	-0.000201458	0.000488194
44	2.72613	2.84691	2.81548	2.81872	2.64326	2.66347	2.65102	2.74614	2.6579	2.44085	3.2598	3.05753	3.39489	3.16641	3.17325	2.96508	2.8784	2.89263	3.15427	3.36483	2.9165	3.03753	2.9843	2.96759	2.92482	2.87143	2.80287	3.24818	2.84358	2.97948	1.96287		44	-0.000388564	-0.00144353	0.000202582	-0.00022156	-7.63863e-06	-0.00128696	0.00262251	0.00149843	0.000307459	-0.000949442	-2.8853e-05	-0.000744205	0.000686665	0.000766314	-1.77735e-05	0.000500857
44.3333	2.72655	2.84932	2.81629	2.81912	2.64283	2.66347	2.65317	2.74531	2.65833	2.43758	3.2619	3.05753	3.39624	3.16605	3.17253	2.96508	2.8784	2.89224	3.15321	3.36582	2.91801	3.03571	2.98541	2.96684	2.9252	2.86989	2.80326	3.24818	2.84397	2.97948	1.96569		44.3333	-0.00116936	-0.00305297	-0.000820058	-0.000956641	-0.000406262	-0.00164039	0.00313884	0.00232609	-0.00101811	-0.00106521	-0.000109583	-0.000670447	0.000802891	0.000790002	8.88882e-05	0.000678339
44.6667	2.71439	2.82438	2.80126	2.8094	2.63937	2.65575	2.65747	2.75154	2.63937	2.43007	3.2598	3.05716	3.39624	3.16605	3.17217	2.96624	2.87879	2.89224	3.15321	3.36943	2.9165	3.03643	2.98578	2.96721	2.92558	2.87066	2.80523	3.2475	2.84397	2.97985	1.96625		44.6667	-0.000444269	-0.00139891	0.000755254	-0.00042247	2.05994e-05	-0.00171081	0.00303878	0.00192263	0.00024147	-0.000548299	-4.61202e-05	-0.000750443	0.000836109	0.000718669	0.00020739	0.000691014
45	2.72947	2.85452	2.82438	2.82155	2.64671	2.6579	2.65403	2.7424	2.6609	2.44038	3.26155	3.05716	3.39691	3.16713	3.17289	2.96701	2.87879	2.89342	3.15251	3.3691	2.91574	3.03643	2.98319	2.96684	2.92444	2.87028	2.80287	3.24784	2.8463	2.97911	1.96569		45	-8.58179e-06	-0.000239693	0.00138481	0.000111943	0.000198597	-0.000890975	0.00283263	0.0018132	0.00097156	-0.000385939	4.61802e-05	-0.000633575	0.000791794	0.000683037	0.000278516	0.000874855
45.3333	2.72697	2.84972	2.81912	2.81791	2.64456	2.65875	2.65704	2.74739	2.66176	2.43991	3.2591	3.05604	3.39691	3.16641	3.17397	2.96624	2.87959	2.89342	3.15357	3.36943	2.91612	3.03607	2.98541	2.96796	2.92331	2.87105	2.80208	3.24886	2.84514	2.97985	1.96456		45.3333	0.000247644	0.000866983	0.00166679	0.000279398	0.000646858	-0.000346534	0.00249216	0.00185436	0.0019628	0.00017719	5.79531e-06	-0.000449044	0.000764019	0.000605766	0.000331802	0.000969862
45.6667	2.72655	2.85012	2.82034	2.81872	2.64369	2.66047	2.65489	2.74822	2.66133	2.43991	3.2605	3.05604	3.39691	3.16677	3.17397	2.96778	2.87919	2.89303	3.15146	3.37205	2.91574	3.03571	2.98541	2.96759	2.92331	2.87028	2.80168	3.2492	2.84902	2.97948	1.96231		45.6667	0.000407285	0.00198031	0.00206919	0.000687035	0.000938562	0.000183751	0.00235724	0.00164222	0.00279891	0.000940524	7.49985e-05	-0.00031374	0.000714154	0.000587865	0.000373289	0.000969859
46	2.71691	2.82761	2.8037	2.81061	2.63894	2.65575	2.66004	2.75403	2.64671	2.43336	3.2605	3.05678	3.39758	3.16749	3.17361	2.96701	2.87998	2.8946	3.15251	3.37271	2.9165	3.03571	2.98541	2.96684	2.92369	2.87028	2.80405	3.2475	2.84824	2.97763	1.96175		46	-0.000747164	0.000294499	0.000921747	0.000266995	0.000597331	4.95543e-05	0.0025194	0.00230364	0.00160403	0.00110298	0.000121158	-0.00026454	0.000763963	0.000486905	0.000391092	0.000950713
46.3333	2.71565	2.8268	2.80492	2.80899	2.63894	2.65661	2.66176	2.75485	2.64369	2.4343	3.26015	3.05641	3.39825	3.16785	3.17469	2.96816	2.87959	2.89303	3.15111	3.37402	2.91536	3.03571	2.98763	2.96759	2.92369	2.86989	2.80168	3.24818	2.85057	2.97837	1.964		46.3333	-0.000589901	0.000735693	0.001128	0.000561159	0.000724243	0.000557895	0.00226009	0.00242291	0.00212934	0.00168381	4.04217e-05	-0.000219241	0.00064814	0.000521453	0.000437434	0.000911475
46.6667	2.72989	2.85571	2.82801	2.82196	2.64671	2.65875	2.66004	2.74531	2.66775	2.44225	3.2612	3.05566	3.39758	3.16749	3.17505	2.96739	2.87998	2.89381	3.15321	3.37336	2.91498	3.03571	2.98689	2.96796	2.92331	2.8695	2.80208	3.25022	2.84902	2.97911	1.96175		46.6667	-0.00022905	0.00181884	0.00154032	0.00108349	0.000824086	0.00136854	0.00205973	0.0023521	0.00295257	0.0020172	0.000248149	-0.000132333	0.000641077	0.000491209	0.00037257	0.000796836
47	2.72697	2.85412	2.82074	2.82115	2.64542	2.6639	2.66004	2.7503	2.66476	2.44085	3.2612	3.05678	3.39758	3.16713	3.17361	2.96816	2.87998	2.89539	3.15041	3.37664	2.91498	3.03643	2.98689	2.96982	2.92331	2.8695	2.80208	3.24954	2.84863	2.97948	1.96006		47	-0.00202067	-0.00141187	-0.000853472	-2.92876e-05	0.000251046	0.00113812	0.00243444	0.00331787	0.000392385	0.000960547	0.000171816	-4.7502e-05	0.000586096	0.000406038	0.000163373	0.000775826
47.3333	2.72697	2.85372	2.82115	2.81953	2.64671	2.66261	2.65961	2.75154	2.66775	2.44272	3.26155	3.05716	3.39859	3.16785	3.17541	2.96893	2.88038	2.89381	3.15146	3.37566	2.91346	3.03571	2.98837	2.96908	2.92217	2.87105	2.80129	3.24852	2.85134	2.97948	1.96006		47.3333	-0.00136459	0.000316588	0.000608897	0.000972238	0.0010141	0.00115762	0.00205937	0.00252767	0.00104732	0.00152003	0.000454922	0.000111979	0.000604404	0.000486273	-5.39617e-05	0.000864945
47.6667	2.72655	2.85412	2.82155	2.82115	2.64714	2.66347	2.6609	2.75112	2.66732	2.44412	3.26015	3.05641	3.39825	3.16857	3.17325	2.96816	2.87998	2.89421	3.15251	3.37795	2.91574	3.03461	2.988	2.96982	2.92255	2.87028	2.80287	3.25124	2.85289	2.97948	1.96118		47.6667	-0.000736149	0.00213494	0.00172669	0.00166487	0.00171125	0.0013478	0.00206864	0.00230784	0.00249716	0.00230588	0.000174933	5.33224e-05	0.000575608	0.000360175	-0.000128412	0.000700099
48	2.71228	2.82842	2.80858	2.81345	2.64153	2.65704	2.66347	2.76023	2.64671	2.43804	3.26085	3.05604	3.39859	3.16749	3.17361	2.96931	2.88038	2.89381	3.15216	3.37926	2.91384	3.0368	2.98689	2.96982	2.92369	2.86989	2.80129	3.24988	2.85522	2.97948	1.96231		48	0.000536365	0.00589798	0.00439549	0.00325823	0.00259084	0.00229815	0.000872494	0.00186299	0.00506353	0.00366042	0.000149947	-7.99884e-05	0.000431673	0.000192921	-0.000269605	0.000906032
[truncated: 15 more columns]

## Sheet: Radius-slope 60s
t (h)	Radius [mm]																				t (h)	Slope
2.66667																					2.66667
3													0.627269								3
3.33333	0.642653					0.660168							0.810256	0.611205	0.654854	0.653164	0.68456				3.33333
3.66667	0.802162	0.740019	0.673851	0.571223		0.783454	0.660168	0.670457	0.719698				0.996247	0.782499	0.812979	0.781085	0.806153				3.66667
4	0.902551	0.850486	0.797884	0.768754		0.891101	0.858497	0.789258	0.831493	0.743096	0.672156		1.09457	0.889581	0.93442	0.904367	0.935603				4
4.33333	0.987078	0.936059	0.908849	0.905075		0.981282	0.981282	0.883386	0.932395	0.866434	0.819051		1.2197	1.00838	1.0492	1.01057	1.04498	0.632533	0.66822		4.33333	0.248822	0.227089	0.2529	0.301227	0.195249	0.271966	0.314599	0.257941	0.263403	0.271	0.297156	0.214983	0.325107	0.282607	0.305648	0.295219	0.290975	0.301115
4.66667	1.06277	1.0088	0.996282	1.00767		1.07452	1.09346	0.970762	1.02228	0.967229	0.937277		1.30717	1.08748	1.15261	1.1126	1.14973	0.768244	0.792324		4.66667	0.248822	0.227089	0.2529	0.301227	0.195249	0.270124	0.304498	0.255637	0.262329	0.269859	0.291163	0.222194	0.318698	0.276516	0.299556	0.290105	0.28432	0.293957
5	1.14344	1.08508	1.08087	1.09867		1.16028	1.18846	1.05307	1.11208	1.05198	1.04436		1.4214	1.18476	1.24481	1.20969	1.235	0.890822	0.872013		5	0.244214	0.22246	0.243997	0.288976	0.202703	0.269149	0.296185	0.253758	0.262073	0.267991	0.286921	0.222415	0.311325	0.270645	0.295898	0.288053	0.278906	0.286756
5.33333	1.22253	1.15733	1.15831	1.19133		1.24381	1.29062	1.13644	1.19516	1.14444	1.13644	0.577184	1.49714	1.25894	1.33644	1.2893	1.32398	0.978335	0.95663		5.33333	0.240981	0.219997	0.238196	0.280936	0.200296	0.267887	0.289283	0.251676	0.261283	0.264103	0.281257	0.216652	0.29203	0.267243	0.293233	0.286532	0.27392	0.28206
5.66667	1.28797	1.22346	1.23275	1.27372		1.32809	1.37453	1.21785	1.27551	1.22625	1.22066	0.660168	1.59646	1.34961	1.42683	1.38118	1.40498	1.07316	1.01493		5.66667	0.229419	0.218072	0.233829	0.274587	0.195319	0.262067	0.282399	0.24996	0.261172	0.26157	0.278164	0.211327	0.275879	0.250635	0.282468	0.277993	0.261126	0.27703
6	1.3553	1.29062	1.29415	1.34006	0.598532	1.41057	1.45124	1.29855	1.35108	1.30993	1.30556	0.727581	1.67286	1.41595	1.50964	1.46807	1.48974	1.1612	1.10462		6	0.225778	0.211158	0.222269	0.255877	0.193067	0.258978	0.261599	0.243987	0.257354	0.260098	0.275871	0.210628	0.270042	0.24252	0.277622	0.272586	0.250195	0.274055
6.33333	1.43145	1.36453	1.36369	1.41864	0.663615	1.49461	1.54269	1.36954	1.43225	1.3861	1.37867	0.793582	1.7598	1.49566	1.6013	1.55437	1.56782	1.24658	1.17539		6.33333	0.223911	0.206892	0.213926	0.246553	0.190945	0.257121	0.249327	0.24052	0.256058	0.25397	0.265983	0.208313	0.259561	0.233718	0.27534	0.269476	0.242997	0.271197
6.66667						1.58788	1.62271	1.45908	1.52932	1.48773	1.48004	0.880799	1.86766	1.58186	1.68799	1.64017	1.64891	1.33727	1.235		6.66667	0.222184	0.203101	0.209286	0.241533	0.188689	0.25474	0.239083	0.23701	0.25512	0.249063	0.260963	0.207728	0.251129	0.226868	0.274052	0.26606	0.236482	0.261335
7	1.59147	1.50071	1.51131	1.59648	0.800738	1.67869	1.70365	1.53973	1.61919	1.56982	1.56982	0.950572	1.93851	1.65359	1.7866	1.74466	1.73003	1.41595	1.32314		7	0.219233	0.198833	0.204844	0.237819	0.187461	0.252433	0.231038	0.231787	0.253182	0.243924	0.255955	0.205453	0.245574	0.220913	0.272919	0.263723	0.231538	0.256786
7.33333	1.66436	1.572	1.57924	1.67393	0.863796	1.7616	1.78412	1.61566	1.70097	1.6381	1.64089	1.00654	2.04127	1.74529	1.88063	1.83783	1.80568	1.50524	1.37556		7.33333	0.216208	0.193598	0.20159	0.233768	0.18462	0.249482	0.222659	0.225447	0.251194	0.238049	0.253274	0.204401	0.239078	0.21446	0.272587	0.26292	0.227396	0.254625
7.66667	1.7401	1.6395	1.64644	1.74795	0.920078	1.84696	1.85313	1.69492	1.79178	1.72363	1.73616	1.06706	2.09524	1.79647	1.97354	1.91615	1.87651	1.58116	1.46052		7.66667	0.213225	0.18773	0.197798	0.229969	0.181579	0.2452	0.215462	0.218734	0.249425	0.23276	0.25256	0.203912	0.232836	0.208946	0.27065	0.258438	0.221126	0.251444
8	1.81204	1.70164	1.713	1.83145	0.983604	1.92855	1.92025	1.77386	1.87394	1.81141	1.82459	1.14643	2.1967	1.88004	2.0687	2.00907	1.95215	1.67286	1.51476		8	0.208379	0.180163	0.194452	0.225709	0.179163	0.239937	0.208772	0.211377	0.24659	0.226428	0.250535	0.205274	0.225219	0.203047	0.270135	0.25584	0.217274	0.248953
8.33333	1.88063	1.75836	1.77129	1.90234	1.04327	2.00626	1.98511	1.84449	1.9614	1.89212	1.91012	1.20466	2.23511	1.93108	2.16222	2.09313	2.02986	1.75351	1.59508		8.33333	0.201503	0.171489	0.189788	0.218333	0.17362	0.234273	0.201235	0.203678	0.241891	0.219583	0.247761	0.205666	0.215904	0.196008	0.267485	0.251225	0.21318	0.244978
8.66667	1.94622	1.81393	1.84078	1.97531	1.10074	2.08161	2.05013	1.91012	2.03561	1.95207	1.99428	1.27908	2.29993	1.98583	2.243	2.16426	2.09154	1.83181	1.65226		8.66667	0.191839	0.161606	0.183422	0.209445	0.166065	0.22834	0.196122	0.193993	0.234226	0.209428	0.240621	0.203968	0.205901	0.187635	0.261706	0.243747	0.206191	0.237441
9	2.00512	1.87029	1.89634	2.04735	1.16323	2.15698	2.11963	1.96198	2.10451	2.01307	2.05236	1.33152	2.40701	2.06549	2.32288	2.24842	2.15966	1.92707	1.69648		9	0.189023	0.158403	0.181442	0.206475	0.163733	0.223715	0.192173	0.186657	0.230018	0.203412	0.237288	0.207322	0.198671	0.181529	0.254769	0.23459	0.200003	0.229388
9.33333	2.06731	1.91549	1.96024	2.11154	1.21033	2.23082	2.17646	2.01986	2.17961	2.08106	2.13679	1.40328	2.44753	2.10996	2.41846	2.33995	2.23659	2.00135	1.77169		9.33333	0.184098	0.151811	0.178473	0.201809	0.159758	0.220878	0.190548	0.181328	0.227547	0.199161	0.236111	0.212257	0.193949	0.177481	0.250799	0.230046	0.197006	0.223925
9.66667	2.12983	1.96489	2.01194	2.17541	1.26021	2.29833	2.23389	2.07997	2.26281	2.15062	2.23134	1.49309	2.53275	2.18712	2.49095	2.39827	2.27821	2.07403	1.80016		9.66667	0.179594	0.146862	0.175966	0.197776	0.156517	0.217876	0.190432	0.176304	0.222779	0.192664	0.230875	0.214183	0.19272	0.176508	0.245873	0.226203	0.192835	0.21693
10	2.18901	2.00967	2.07338	2.24052	1.31514	2.36585	2.29833	2.13572	2.33624	2.21234	2.3023	1.56764	2.57559	2.23214	2.59227	2.49494	2.36719	2.15299	1.88767		10	0.177778	0.144576	0.174821	0.194462	0.153607	0.214119	0.188723	0.172294	0.219526	0.188168	0.228405	0.215442	0.189085	0.173449	0.240729	0.219585	0.187424	0.206878
10.3333	2.24713	2.05902	2.13358	2.30081	1.36286	2.43851	2.35424	2.19109	2.40601	2.27388	2.37595	1.63042	2.63246	2.2903	2.66833	2.5588	2.42622	2.21524	1.94136		10.3333	0.177884	0.143987	0.175786	0.193826	0.153635	0.209161	0.186177	0.168037	0.21389	0.182702	0.222441	0.214344	0.187724	0.172203	0.234157	0.210791	0.181296	0.196361
10.6667	2.29088	2.09962	2.18327	2.36536	1.40328	2.50907	2.42255	2.23695	2.45715	2.31219	2.42491	1.68276	2.68402	2.32954	2.72286	2.61096	2.46194	2.25529	1.97969		10.6667	0.178044	0.143815	0.175344	0.192057	0.153809	0.202672	0.181638	0.164449	0.209049	0.179697	0.218013	0.212025	0.181114	0.168126	0.226405	0.199199	0.174045	0.183648
11	2.35085	2.14318	2.23746	2.42114	1.45516	2.58257	2.48761	2.30081	2.54967	2.38984	2.51951	1.78028	2.74026	2.39088	2.79695	2.66998	2.52445	2.31239	2.03095		11	0.177472	0.143638	0.175173	0.189733	0.153045	0.195189	0.175414	0.160532	0.201829	0.174711	0.212481	0.207263	0.174777	0.163238	0.214439	0.183546	0.163213	0.168854
11.3333	2.41264	2.19057	2.29982	2.48853	1.50602	2.66047	2.56083	2.36729	2.63245	2.46226	2.60981	1.86479	2.82838	2.46284	2.89672	2.76635	2.608	2.4093	2.10261		11.3333	0.17481	0.143428	0.172691	0.186525	0.151602	0.185787	0.168666	0.15458	0.193077	0.169015	0.202525	0.199137	0.168488	0.157675	0.200639	0.168426	0.153165	0.155052
11.6667	2.46873	2.23899	2.35666	2.55325	1.55741	2.72571	2.62507	2.41972	2.68268	2.50862	2.65918	1.92144	2.89214	2.52182	2.96237	2.83502	2.65421	2.4552	2.15659		11.6667	0.171265	0.141643	0.169663	0.181264	0.148782	0.175275	0.160105	0.148585	0.182771	0.162555	0.192264	0.18908	0.158186	0.14946	0.186572	0.154344	0.14364	0.141008
12	2.5416	2.29833	2.42161	2.62072	1.61071	2.77918	2.66861	2.47151	2.75568	2.57416	2.74573	1.99657	2.94666	2.57044	3.03206	2.8818	2.70044	2.49405	2.20373		12	0.166099	0.139013	0.1646	0.174869	0.144635	0.163905	0.150773	0.141242	0.171732	0.154668	0.180329	0.177284	0.149895	0.142355	0.170603	0.139284	0.131427	0.126803
12.3333	2.61069	2.35279	2.49448	2.69583	1.68141	2.82721	2.71775	2.50634	2.79637	2.60369	2.77548	2.03505	2.99317	2.62026	3.08303	2.91232	2.74227	2.5345	2.25136		12.3333	0.159169	0.134835	0.158187	0.167109	0.139558	0.151266	0.140034	0.13391	0.161446	0.148258	0.169836	0.167311	0.140952	0.134235	0.15804	0.127942	0.122599	0.115382
12.6667	2.66433	2.39936	2.5425	2.74573	1.72957	2.87086	2.75485	2.5528	2.85611	2.66647	2.84972	2.10288	3.02805	2.65546	3.13105	2.93651	2.77194	2.56182	2.2816		12.6667	0.151537	0.130037	0.150465	0.158509	0.133182	0.138928	0.129124	0.125625	0.149758	0.139966	0.157242	0.154783	0.130172	0.12502	0.144822	0.115803	0.113307	0.10373
13	2.71102	2.44132	2.59271	2.79555	1.76742	2.91698	2.79024	2.59095	2.8946	2.70554	2.89697	2.14105	3.08733	2.70412	3.15567	2.95303	2.78745	2.58416	2.28063		13	0.1411	0.123717	0.141131	0.148771	0.125181	0.126917	0.118534	0.116475	0.137324	0.130647	0.144237	0.140991	0.120136	0.115821	0.131892	0.104594	0.103507	0.09137
13.3333	2.74864	2.4798	2.62985	2.83929	1.79877	2.94888	2.82721	2.62333	2.94191	2.75278	2.93492	2.18953	3.09413	2.72408	3.19604	2.9917	2.8319	2.60842	2.34703		13.3333	0.129981	0.115922	0.13085	0.137196	0.116835	0.116458	0.109123	0.108426	0.126999	0.121393	0.132156	0.128846	0.109937	0.106834	0.119161	0.0941647	0.0945603	0.0790729
13.6667	2.79106	2.51271	2.67202	2.87562	1.83581	2.9835	2.8605	2.66561	2.97814	2.78902	2.98044	2.22929	3.1208	2.75514	3.22735	3.01928	2.85947	2.63288	2.38023		13.6667	0.118873	0.107703	0.120458	0.12572	0.1081	0.107958	0.101613	0.102237	0.119304	0.114607	0.123862	0.119947	0.105142	0.100602	0.110302	0.0885243	0.0891213	0.0724852
14	2.82236	2.54609	2.70976	2.91698	1.86846	3.02149	2.89972	2.68947	3.00673	2.81142	2.9938	2.24459	3.15392	2.78388	3.25837	3.05458	2.88755	2.65171	2.40333		14	0.106964	0.0987129	0.10964	0.114837	0.0988326	0.100826	0.0954426	0.0966964	0.111444	0.107493	0.114916	0.11139	0.0985266	0.092952	0.102216	0.0845336	0.0836095	0.0654327
14.3333	2.85092	2.57505	2.74074	2.95081	1.89634	3.05043	2.92128	2.72613	3.05267	2.86449	3.05267	2.30131	3.20087	2.82056	3.3025	3.08876	2.91953	2.68402	2.45024		14.3333	0.0972422	0.0903725	0.100163	0.104807	0.089507	0.0942699	0.0888028	0.0926621	0.106561	0.103511	0.111319	0.105947	0.0942507	0.087206	0.0983694	0.0831505	0.0799298	0.0600974
14.6667	2.88631	2.60544	2.76849	2.99037	1.92441	3.0828	2.95815	2.7503	3.0765	2.88236	3.07056	2.32449	3.22015	2.83969	3.32552	3.10518	2.93802	2.69758	2.46643		14.6667	0.0897004	0.0838843	0.0927782	0.097342	0.0831327	0.0883398	0.0837496	0.0877328	0.0999475	0.0960116	0.103744	0.0979486	0.0893522	0.08108	0.0940321	0.0800097	0.0755196	0.0548939
15	2.91346	2.63375	2.80004	3.01847	1.95441	3.11116	2.98235	2.78123	3.12105	2.92869	3.12507	2.36633	3.26548	2.88564	3.37435	3.14479	2.97651	2.72408	2.50643		15	0.083365	0.0776627	0.0855059	0.0899091	0.0772937	0.0819487	0.0781506	0.0835309	0.0953195	0.0909988	0.0997522	0.0931417	0.0841007	0.0744828	0.0903702	0.0756734	0.0702231	0.0494811
15.3333	2.94036	2.65704	2.83003	3.04369	1.98223	3.14145	3.01166	2.80858	3.14508	2.94152	3.14073	2.38314	3.29513	2.90891	3.3985	3.17278	2.99797	2.73622	2.52926		15.3333	0.0774755	0.0715199	0.0792785	0.082873	0.0717104	0.0761262	0.0717238	0.079605	0.090859	0.0875629	0.0973625	0.0886288	0.0832198	0.0713721	0.0849351	0.069352	0.0629219	0.0446599
15.6667	2.96662	2.6831	2.85492	3.06982	2.00683	3.16353	3.0328	2.83446	3.17433	2.97392	3.1772	2.41784	3.33945	2.93915	3.42151	3.19258	3.01488	2.75153	2.53188		15.6667	0.0713365	0.0656879	0.072896	0.076185	0.0657244	0.0694599	0.0654544	0.0750384	0.0867668	0.0850365	0.0942919	0.0850864	0.0772264	0.0650848	0.0794217	0.0639174	0.0577015	0.039307
16	2.98541	2.7009	2.87681	3.0972	2.02494	3.18509	3.05006	2.85771	3.20438	3.0018	3.20758	2.44738	3.33182	2.93538	3.44019	3.20018	3.02805	2.75032	2.56441		16	0.0658858	0.0598744	0.0672274	0.0690743	0.0600275	0.0623486	0.0596486	0.0706878	0.0812766	0.0804761	0.0903122	0.0803775	0.0700022	0.0588071	0.0734591	0.0582925	0.0524156	0.0344504
16.3333	3.00863	2.71523	2.90129	3.11776	2.04009	3.20509	3.06535	2.88552	3.23626	3.03919	3.25209	2.47888	3.36516	2.96684	3.48139	3.23283	3.05494	2.77154	2.59951		16.3333	0.0600171	0.0538836	0.0618818	0.0626098	0.0539713	0.0556707	0.0540601	0.0655822	0.0753068	0.0765302	0.0854309	0.073878	0.0653058	0.0546584	0.0672492	0.0538153	0.0471102	0.0301057
16.6667	3.02791	2.7399	2.91737	3.13891	2.05902	3.22638	3.09019	2.90483	3.25139	3.04669	3.26155	2.48853	3.37435	2.97094	3.49185	3.23795	3.05783	2.77194	2.60715		16.6667	0.053721	0.0480374	0.0559253	0.0564476	0.0480134	0.0490564	0.0484673	0.0603572	0.0696097	0.0727312	0.0810858	0.0684387	0.0584966	0.0478824	0.0612582	0.0488487	0.0424557	0.0258498
17	3.04706	2.75278	2.93297	3.15486	2.07117	3.23732	3.10345	2.9244	3.2776	3.07242	3.29219	2.51724	3.39362	2.98356	3.51079	3.25192	3.06686	2.77752	2.62068		17	0.0479162	0.0426734	0.0498026	0.0511891	0.0424801	0.04309	0.0437722	0.0548463	0.0627586	0.0679278	0.0747608	0.062087	0.0504505	0.040679	0.054208	0.0425005	0.0368855	0.0211858
17.3333	3.06088	2.76354	2.95004	3.16893	2.08654	3.25033	3.1119	2.94462	3.30464	3.11043	3.327	2.54474	3.42958	3.01671	3.52744	3.26514	3.07765	2.79339	2.61731		17.3333	0.0423299	0.0372542	0.0449125	0.0466677	0.0382192	0.0376131	0.0390306	0.049642	0.0572209	0.0646575	0.070407	0.0569759	0.0448034	0.0360179	0.0497734	0.038052	0.0336289	0.0182986
17.6667	3.07279	2.77548	2.9647	3.18366	2.09908	3.26015	3.12397	2.95931	3.32151	3.132	3.34751	2.56528	3.427	3.01342	3.54151	3.28102	3.0952	2.79457	2.66211		17.6667	0.036866	0.0323094	0.0403436	0.0415996	0.0340568	0.0330345	0.0351767	0.0447684	0.051205	0.0597125	0.0641224	0.0508171	0.0385623	0.030611	0.0439955	0.033404	0.029661	0.0148387
18	3.08428	2.78656	2.97852	3.19439	2.10884	3.26714	3.13927	2.96816	3.32837	3.13236	3.35398	2.56973	3.43891	3.02549	3.55801	3.29513	3.10625	2.80208	2.67577		18	0.0319915	0.0280745	0.0362676	0.0367546	0.0305527	0.0285182	0.0309444	0.040087	0.0455502	0.0562419	0.059346	0.0461442	0.0359457	0.0275232	0.0390637	0.0296416	0.0264799	0.0125595
18.3333	3.0924	2.79147	2.98885	3.2058	2.11262	3.27446	3.14218	2.98311	3.34854	3.16965	3.39153	2.59051	3.47885	3.05856	3.57444	3.31153	3.11442	2.81349	2.67123		18.3333	0.0272751	0.0240983	0.0324748	0.0328054	0.0271267	0.0246477	0.027465	0.0352351	0.0398765	0.051332	0.0530626	0.0409726	0.0307	0.0229743	0.0339501	0.0252608	0.0234195	0.00980035
18.6667	3.09977	2.80004	2.99304	3.21752	2.12178	3.28351	3.15739	2.98808	3.35466	3.16893	3.39456	2.59271	3.45686	3.03498	3.57784	3.30952	3.12151	2.80366	2.69307		18.6667	0.0233089	0.0199662	0.0291898	0.029207	0.0235787	0.0213127	0.0236607	0.0317786	0.0352009	0.0480909	0.0488393	0.0373298	0.0260626	0.0189285	0.0302548	0.0214856	0.0207135	0.00766994
19	3.10492	2.80696	3.00104	3.22496	2.1309	3.29115	3.16281	3.00066	3.36553	3.18867	3.41065	2.605	3.46453	3.04407	3.58617	3.3132	3.12434	2.80366	2.70003		19	0.01978	0.0170822	0.0257285	0.02621	0.0206107	0.0187417	0.020583	0.0287279	0.0300699	0.0443138	0.0439786	0.0328198	0.0211484	0.014565	0.0262994	0.0172889	0.0177772	0.00533519
19.3333	3.1119	2.80696	3.01545	3.23873	2.14318	3.29773	3.16821	3.00939	3.37501	3.20117	3.42367	2.61549	3.47663	3.05023	3.59909	3.32086	3.13388	2.80838	2.70821		19.3333	0.0169618	0.0145048	0.0224183	0.0233838	0.0177615	0.0162851	0.0184684	0.0254984	0.0254318	0.0390185	0.0384488	0.0286405	0.0170992	0.0107969	0.0229968	0.0138947	0.0147151	0.00373633
19.6667	3.11483	2.81345	3.01961	3.24049	2.14318	3.30257	3.17397	3.01885	3.38446	3.21469	3.43565	2.62681	3.47122	3.04298	3.59479	3.31553	3.12788	2.80247	2.70617		19.6667	0.0148126	0.0122076	0.0193696	0.0206817	0.0159145	0.0142484	0.0156168	0.0229872	0.0222118	0.0361962	0.0346322	0.0257468	0.015684	0.00974895	0.0201175	0.0108791	0.0116658	0.00341455
20	3.11922	2.81629	3.02715	3.24506	2.14797	3.30429	3.17253	3.02565	3.39389	3.23732	3.4575	2.64197	3.48552	3.05349	3.60921	3.32518	3.13775	2.8076	2.72245		20	0.0129367	0.0102261	0.0167592	0.0183247	0.0144656	0.0125787	0.0130875	0.0206793	0.0194504	0.0340375	0.0313638	0.0240563	0.0123248	0.00683339	0.01679	0.00764944	0.00898394	0.00226377
20.3333	3.12434	2.82034	3.03318	3.25139	2.15115	3.30912	3.1833	3.02866	3.39523	3.23415	3.45353	2.63981	3.49217	3.06217	3.61686	3.33216	3.14409	2.81349	2.72935		20.3333	0.0114941	0.00873654	0.0145774	0.0160485	0.0131012	0.0106477	0.0107797	0.0181066	0.0167604	0.0311408	0.0281058	0.0220474	0.00947932	0.00495438	0.0144056	0.00598813	0.0071653	0.00210099
20.6667	3.12799	2.82196	3.03581	3.25665	2.15327	3.31188	3.18438	3.03881	3.39993	3.24612	3.46343	2.65059	3.48615	3.05168	3.61258	3.32219	3.13564	2.80563	2.72245		20.6667	0.0107948	0.00663773	0.0129197	0.0146466	0.0120017	0.00875613	0.00808135	0.0160817	0.0151009	0.0303348	0.0269909	0.0209817	0.0107183	0.00652357	0.0130965	0.00611062	0.00596702	0.00320308
21	3.12981	2.82357	3.03769	3.2612	2.15592	3.31257	3.18259	3.04594	3.40496	3.26644	3.48117	2.65918	3.4928	3.05783	3.61961	3.32685	3.14338	2.80878	2.73016		21	0.0096889	0.00543107	0.010472	0.0129953	0.0104142	0.0075178	0.00697892	0.0132186	0.0125908	0.0261981	0.0233781	0.0180751	0.0114634	0.00763884	0.011209	0.0051596	0.00451272	0.0037063
21.3333	3.13163	2.82559	3.04107	3.26469	2.15909	3.31532	3.19225	3.04482	3.40496	3.2577	3.47527	2.65747	3.49881	3.06361	3.6254	3.33348	3.14585	2.81585	2.73784		21.3333	0.0083883	0.00479415	0.00826601	0.0113325	0.00908172	0.00655101	0.00560872	0.0108833	0.0105984	0.0230847	0.0205208	0.0155532	0.00870353	0.00584658	0.00918778	0.00378905	0.00314044	0.00293511
21.6667	3.13636	2.82801	3.04182	3.26784	2.16595	3.31739	3.18975	3.04856	3.40898	3.26923	3.48248	2.66176	3.50102	3.06578	3.62936	3.33547	3.14655	2.81663	2.73905		21.6667	0.00748762	0.00368389	0.0069888	0.0104881	0.00882133	0.00595029	0.0044595	0.00870419	0.00876329	0.0197872	0.0178357	0.0131859	0.00722273	0.00484845	0.00806072	0.00328003	0.00279213	0.00272198
22	3.13782	2.82801	3.04444	3.27063	2.16859	3.32082	3.19189	3.0508	3.41132	3.27725	3.49001	2.66946	3.49628	3.05892	3.6254	3.32651	3.14127	2.81074	2.73501		22	0.00656352	0.0031421	0.00568262	0.00907423	0.00804692	0.00532366	0.00361362	0.00697729	0.0075079	0.0166458	0.0152771	0.0110449	0.00506953	0.00300082	0.00602846	0.0021502	0.00147882	0.00185277
22.3333	3.13964	2.82882	3.04594	3.27342	2.16964	3.32014	3.1876	3.05305	3.419	3.29357	3.50632	2.67842	3.49913	3.06289	3.62967	3.33348	3.14479	2.81467	2.74066		22.3333	0.00555188	0.00282035	0.00468369	0.00783426	0.00730204	0.00454437	0.00222392	0.0053107	0.00674865	0.0150154	0.0140906	0.00984422	0.00433994	0.00266792	0.0053357	0.00223675	0.00139692	0.00194888
22.6667	3.1469	2.82398	3.05043	3.28212	2.17803	3.32082	3.18832	3.05529	3.42101	3.29807	3.50957	2.68183	3.50386	3.06542	3.63332	3.33878	3.14795	2.81624	2.74348		22.6667	0.00476407	0.00243382	0.00402082	0.00658123	0.00657572	0.00406113	0.00165174	0.00350953	0.00583478	0.0121143	0.0116741	0.0078214	0.00408596	0.0033825	0.00502269	0.00295823	0.00185462	0.00215656
23	3.14327	2.82842	3.04781	3.27864	2.17332	3.3246	3.19439	3.05305	3.41734	3.28664	3.50046	2.67586	3.52869	3.08948	3.63332	3.33481	3.14268	2.82212	2.7257		23	0.00417491	0.00224678	0.00332175	0.00552007	0.00561645	0.00349389	0.00107968	0.0023733	0.00488467	0.00972315	0.00947587	0.00646223	0.0023835	0.00138433	0.00351344	0.00144834	0.000555741	0.000964602
23.3333	3.14254	2.83084	3.05006	3.28003	2.17384	3.32529	3.19154	3.05454	3.42034	3.29357	3.50697	2.67927	3.49628	3.05856	3.63149	3.3305	3.14374	2.81232	2.73986		23.3333	0.00346649	0.00205341	0.00288179	0.00456985	0.00441649	0.00286991	0.000123934	0.00173219	0.00419496	0.0090709	0.00861776	0.00558684	0.00123982	3.0179e-05	0.00240319	0.000207254	7.50232e-05	9.05711e-05
23.6667	3.14472	2.83003	3.0508	3.28143	2.17751	3.327	3.19225	3.05492	3.42001	3.29461	3.50957	2.68098	3.50039	3.06181	3.63302	3.33315	3.1462	2.81389	2.74389		23.6667	0.00281209	0.00168785	0.00233823	0.00364382	0.00335614	0.00198086	0.000123986	0.000838074	0.00325721	0.00678015	0.00644974	0.00405604	0.000773381	-0.000419383	0.0021567	0.000153097	0.00013316	0.000259129
24	3.14653	2.83205	3.05155	3.28073	2.17803	3.32597	3.19261	3.05604	3.42234	3.296	3.5112	2.68098	3.50386	3.06361	3.63454	3.33514	3.14549	2.81506	2.74389		24	0.00233866	0.00154847	0.00177616	0.00272454	0.00247295	0.00122229	-8.81141e-05	0.000271134	0.00239231	0.00504681	0.00455942	0.00237335	0.00276347	0.00105307	0.0019261	9.33499e-05	-0.000481606	0.000847857
24.3333	3.14581	2.83406	3.05118	3.28386	2.17856	3.32632	3.19189	3.05492	3.42267	3.29842	3.51217	2.68183	3.50701	3.0701	3.63788	3.33945	3.14936	2.82095	2.74912		24.3333	0.00190129	0.00150862	0.00126399	0.00186332	0.00190143	0.000679191	-0.000270866	-0.000270935	0.00158288	0.00368902	0.00302149	0.00141702	0.000680089	-0.0012176	0.000902518	-0.00155852	-0.00151923	-0.000395163
24.6667	3.14653	2.83164	3.05155	3.28282	2.18013	3.32735	3.19082	3.05492	3.42434	3.29946	3.51347	2.68268	3.50764	3.07334	3.63758	3.34011	3.14936	2.81742	2.74952		24.6667	0.001303	0.00143566	0.000838309	0.00110589	0.00120926	-0.000362152	-0.00145083	-0.00039407	0.00177477	0.00471188	0.00392908	0.00176676	0.00273814	0.000624677	0.00106216	-0.00113742	-0.0013276	0.000541303
25	3.14798	2.83366	3.05118	3.28386	2.18013	3.32632	3.19082	3.05417	3.42334	3.30153	3.51412	2.68395	3.5026	3.06	3.63393	3.3305	3.14233	2.8131	2.74389		25	0.00137486	0.000657684	0.000678118	0.0012148	0.00142521	-0.00142052	-0.00256603	-0.000240126	0.00212061	0.00607695	0.00485368	0.00229929	0.00101174	-0.00109016	0.000856822	-0.00129106	-0.0013393	2.43066e-05
25.3333	3.14798	2.83366	3.05417	3.28421	2.17908	3.32735	3.1901	3.05342	3.42401	3.30464	3.51542	2.68438	3.50323	3.06072	3.63332	3.32917	3.14268	2.81389	2.74389		25.3333	0.00109388	0.000298921	0.000320484	0.000888046	0.000742764	-0.00211111	-0.00303929	-0.000406372	0.00188922	0.00578715	0.00452335	0.00212271	0.00296739	0.000543444	0.00107723	-0.00107731	-0.00123462	0.000561355
25.6667	3.14943	2.83124	3.05193	3.28421	2.18065	3.32392	3.18975	3.05342	3.42467	3.30464	3.51477	2.68395	3.50481	3.06361	3.63758	3.33381	3.14514	2.81703	2.74751		25.6667	0.000651404	0.000152852	8.01266e-05	0.000458331	0.00010354	-0.00260927	-0.00281472	-0.000782226	0.00133445	0.0044836	0.00339455	0.00140782	0.00346907	0.000616287	0.00053598	-0.00195198	-0.00227892	0.000193043
26	3.14871	2.83164	3.05267	3.28386	2.17803	3.32426	3.1901	3.05379	3.42401	3.30464	3.51574	2.68183	3.52806	3.08052	3.63515	3.33149	3.1374	2.82056	2.72894		26	0.000298802	-0.000192486	1.85082e-05	0.000286472	-0.000181283	-0.00305716	-0.00318123	-0.000893109	0.00109255	0.00434532	0.00348974	0.00143569	0.00121131	-0.00179264	-6.53621e-05	-0.00284933	-0.00259209	-0.00095917
26.3333	3.14943	2.83325	3.05193	3.28386	2.18013	3.32357	3.18796	3.0523	3.42434	3.30498	3.51607	2.68353	3.49691	3.05313	3.63271	3.32518	3.13775	2.80956	2.74066		26.3333	6.02654e-06	-0.000371751	-0.000166366	-4.0095e-05	-0.000517931	-0.00352772	-0.0035129	-0.000708397	0.000938796	0.00417291	0.00350512	0.00139345	-0.000734558	-0.00393421	-0.000732012	-0.00357237	-0.00306802	-0.00198857
26.6667	3.14762	2.83285	3.0523	3.28386	2.17961	3.31979	3.18223	3.05417	3.42767	3.31463	3.52611	2.68862	3.53558	3.08912	3.64092	3.33779	3.14549	2.82682	2.7342		26.6667	-0.000400322	-0.000305402	-0.00037589	-0.000120277	-0.000932422	-0.00372639	-0.00371457	-0.000708431	0.0005929	0.00398407	0.00342445	0.00133031	-0.00160308	-0.00459868	-0.000406139	-0.00282878	-0.00231436	-0.00184622
27	3.14726	2.83205	3.0508	3.28421	2.18065	3.31876	3.18115	3.05454	3.42834	3.31636	3.52579	2.6882	3.49786	3.05458	3.63484	3.32651	3.13987	2.81232	2.74107		27	-0.000794732	-0.000471398	-0.000529944	-0.000372308	-0.000906495	-0.00381245	-0.0039755	-0.000653032	0.000472196	0.00348314	0.00332787	0.0011763	-0.00228969	-0.00473535	-0.000295768	-0.0020421	-0.00154356	-0.00196872
27.3333	3.14798	2.83245	3.05193	3.28421	2.17751	3.31773	3.17936	3.05379	3.428	3.31601	3.52643	2.68905	3.50512	3.05856	3.6394	3.33282	3.14585	2.81546	2.7459		27.3333	-0.000962046	-0.000398387	-0.000782637	-0.0004926	-0.00135622	-0.00380203	-0.00391132	-0.000776334	0.000120836	0.00303371	0.00292719	0.00121836	-0.00331396	-0.00577891	-0.00045595	-0.00201965	-0.00133425	-0.00230441
27.6667	3.14798	2.83245	3.05118	3.28247	2.17803	3.31773	3.18724	3.05006	3.42301	3.30257	3.51509	2.68183	3.5243	3.0737	3.63484	3.32651	3.13352	2.81663	2.72124		27.6667	-0.00119516	-0.000405126	-0.000628687	-0.000578545	-0.00164135	-0.00360533	-0.00379405	-0.000807111	-0.00023601	0.00260782	0.00268664	0.00119049	-0.0020715	-0.00507673	-0.000701363	-0.00247384	-0.00148516	-0.00205083
28	3.14726	2.83164	3.0523	3.28386	2.17803	3.31498	3.17972	3.05155	3.427	3.31463	3.52579	2.68778	3.49628	3.04733	3.63302	3.32252	3.13634	2.8076	2.73663		28	-0.00127305	-0.000750593	-0.000702664	-0.000555634	-0.00160699	-0.00352114	-0.00286631	-0.00120799	-0.0010052	0.000720998	0.000993247	0.000251851	-0.00384986	-0.00619402	-0.000751493	-0.00237581	-0.00128837	-0.00247839
28.3333	3.14617	2.83124	3.05043	3.28351	2.17699	3.31395	3.17756	3.05267	3.42634	3.31601	3.52579	2.6882	3.4947	3.04552	3.63058	3.32019	3.13388	2.80641	2.7342		28.3333	-0.00144661	-0.00112938	-0.000727406	-0.000647312	-0.00182292	-0.00317057	-0.00246581	-0.00127584	-0.00135651	0.000113472	0.000464547	-0.00011228	-0.00290309	-0.00522366	-0.00108226	-0.00273277	-0.00193858	-0.00234981
28.6667	3.14581	2.83124	3.05043	3.28282	2.17541	3.31429	3.1772	3.05155	3.42467	3.31636	3.52611	2.6882	3.50039	3.04987	3.63606	3.32751	3.13987	2.80996	2.73945		28.6667	-0.00143494	-0.00137555	-0.000850787	-0.000664504	-0.00172807	-0.00263268	-0.00147874	-0.00165818	-0.00220831	-0.00200664	-0.00112162	-0.00113493	-0.00494859	-0.00678879	-0.0016286	-0.00351618	-0.00246679	-0.00335401
29	3.14508	2.83124	3.05043	3.28212	2.17751	3.31222	3.17541	3.05155	3.42534	3.31498	3.52676	2.68735	3.50039	3.04806	3.63393	3.32518	3.13846	2.80956	2.73663		29	-0.00155465	-0.00151529	-0.000795355	-0.000647324	-0.00174571	-0.00241756	-0.0014077	-0.0016954	-0.00248888	-0.0025176	-0.00136167	-0.00134502	-0.00191828	-0.00359729	-0.000751809	-0.0021647	-0.00163117	-0.00165325
29.3333	3.14545	2.83124	3.04968	3.28212	2.17226	3.31188	3.17613	3.05006	3.42434	3.31567	3.52514	2.68862	3.50165	3.05023	3.63484	3.32618	3.13916	2.81114	2.73703		29.3333	-0.00184202	-0.0016483	-0.0010421	-0.000521306	-0.0015216	-0.00225351	-0.00185212	-0.0015724	-0.00232977	-0.00173308	-0.000902108	-0.000903637	0.000279928	-0.00105333	-0.000130408	-0.00151768	-0.00118948	-7.39075e-05
29.6667	3.14436	2.83003	3.05006	3.28177	2.17384	3.31016	3.17505	3.05118	3.42367	3.31463	3.52708	2.6882	3.52368	3.06542	3.63484	3.32219	3.13458	2.81585	2.71798		29.6667	-0.00203393	-0.00196793	-0.0011718	-0.000567259	-0.00162561	-0.00193592	-0.00165636	-0.00156047	-0.00256157	-0.00243908	-0.00150098	-0.00111407	9.71887e-05	-0.000865224	0.000551134	-0.000416829	8.71642e-05	0.000678505
30	3.14363	2.82882	3.04968	3.28247	2.17436	3.31016	3.18115	3.04706	3.41867	3.30153	3.51509	2.68012	3.4947	3.04443	3.6321	3.32119	3.13388	2.80563	2.73178		30	-0.00204032	-0.00222121	-0.00125823	-0.000710525	-0.00177337	-0.00151621	-0.000947655	-0.00180718	-0.0031169	-0.0041272	-0.00286303	-0.00184239	0.00112198	1.51866e-05	0.000260328	-0.00089474	-0.000982705	0.000905303
30.3333	3.14254	2.82761	3.04893	3.28143	2.17384	3.31016	3.17397	3.04893	3.42267	3.31395	3.52579	2.68778	3.49344	3.04262	3.63119	3.3172	3.13247	2.80523	2.73016		30.3333	-0.00209463	-0.0024478	-0.00136353	-0.000624625	-0.00146215	-0.00168161	-0.00137492	-0.00185046	-0.00284779	-0.00343851	-0.00220577	-0.00129588	-0.000223028	-0.00113022	7.49936e-05	-0.00160248	-0.00135458	0.000380872
30.6667	3.14254	2.8264	3.04819	3.28177	2.17384	3.3105	3.17972	3.04669	3.417	3.2998	3.51639	2.68012	3.49375	3.04262	3.63119	3.31786	3.13247	2.80405	2.72894		30.6667	-0.00219677	-0.00252791	-0.00151793	-0.000630446	-0.00122869	-0.00159661	-0.00196793	-0.0017027	-0.00243011	-0.00259105	-0.00142581	-0.000658412	-0.00149505	-0.00222144	-0.000416332	-0.00209019	-0.0020928	-0.000117652
31	3.14218	2.8268	3.04893	3.28177	2.17226	3.30947	3.17577	3.04706	3.41767	3.30395	3.51834	2.68183	3.49944	3.04697	3.63575	3.32352	3.13634	2.81035	2.7342		31	-0.00223307	-0.00270827	-0.00176511	-0.000687828	-0.00103826	-0.00129004	-0.00200322	-0.00193174	-0.00266195	-0.00289975	-0.00188055	-0.000861764	-0.00198052	-0.00249321	-6.53034e-05	-0.00177227	-0.00170929	-0.000129667
31.3333	3.14	2.8268	3.04706	3.28212	2.17226	3.30843	3.17073	3.04706	3.41967	3.31326	3.52449	2.68778	3.529	3.0737	3.6394	3.32718	3.1374	2.8233	2.72124		31.3333	-0.00224536	-0.00262893	-0.00188884	-0.000699293	-0.000657902	-0.00131869	-0.0024001	-0.00191992	-0.00254172	-0.00280357	-0.00167762	-0.000896644	0.000593786	-0.000874217	0.00033074	-0.001037	-0.00154081	0.00113243
31.6667	3.13891	2.82357	3.04631	3.28003	2.17121	3.30947	3.17756	3.04556	3.41466	3.29807	3.51282	2.68012	3.50165	3.04842	3.63545	3.32452	3.13846	2.8131	2.7342		31.6667	-0.00200615	-0.00246325	-0.00216091	-0.000745177	-0.000935001	-0.00117671	-0.00264297	-0.00207478	-0.00232779	-0.00250323	-0.00157609	-0.000679507	-0.000384522	-0.00131267	0.000320885	-0.00071346	-0.00137277	0.00114682
32	3.13927	2.82276	3.04669	3.28038	2.16911	3.30912	3.17325	3.04594	3.415	3.30084	3.51607	2.68183	3.4909	3.03607	3.63028	3.31453	3.12788	2.80602	2.72813		32	-0.00172486	-0.00225739	-0.00224778	-0.000716505	-0.00103906	-0.00145554	-0.00320638	-0.00172325	-0.00176684	-0.00127439	-0.000374031	0.000119316	0.00149629	0.000144036	0.000641864	-0.000575924	-0.00155885	0.00178289
32.3333	3.13818	2.82236	3.04444	3.28073	2.17226	3.30498	3.16821	3.04556	3.41734	3.3105	3.52417	2.68778	3.49407	3.04007	3.63271	3.31486	3.1307	2.8072	2.72975		32.3333	-0.00138358	-0.00215141	-0.00222962	-0.000716588	-0.000952617	-0.00152386	-0.00244238	-0.00208188	-0.00220224	-0.00253281	-0.00146451	-0.000820185	0.00226704	0.000714079	0.000416414	-0.00129012	-0.00253204	0.00165369
32.6667	3.13746	2.82276	3.04482	3.27969	2.17174	3.30705	3.16713	3.04519	3.418	3.30981	3.52514	2.6882	3.49628	3.04153	3.63241	3.31853	3.12894	2.80878	2.72854		32.6667	-0.00115006	-0.00214533	-0.00230422	-0.000739532	-0.00110899	-0.00160366	-0.0028934	-0.00187211	-0.00149247	-0.000899783	-0.000208806	-3.52335e-05	0.00116782	2.38196e-05	0.00038626	-0.001339	-0.00236263	0.00139461
33	3.13709	2.82034	3.04294	3.27934	2.17226	3.30774	3.17145	3.04144	3.41199	3.29669	3.51217	2.6797	3.49786	3.04407	3.63484	3.31786	3.13247	2.80996	2.73178		33	-0.000868654	-0.00211906	-0.00227362	-0.00075106	-0.00120479	-0.00146734	-0.00212918	-0.0021692	-0.0019666	-0.00226128	-0.00117117	-0.000981911	0.00173375	0.000687204	0.000195737	-0.00179412	-0.00301469	0.00116675
33.3333	3.13673	2.82115	3.04294	3.28003	2.17121	3.30567	3.16893	3.04219	3.41266	3.29911	3.51574	2.68098	3.52838	3.06433	3.63758	3.32319	3.1307	2.8233	2.7192		33.3333	-0.000647224	-0.0020665	-0.0022064	-0.000877394	-0.00162159	-0.00131383	-0.00170229	-0.00234903	-0.0020163	-0.00278473	-0.00158771	-0.0014232	-6.71197e-05	-0.000576892	0.000381324	-0.00166781	-0.00264219	0.000591317
33.6667	3.13746	2.82034	3.04107	3.27934	2.16964	3.30671	3.16857	3.04069	3.41266	3.29773	3.51477	2.68098	3.49565	3.04371	3.63302	3.31753	3.12858	2.81114	2.73178		33.6667	-0.000539427	-0.00176053	-0.00210165	-0.000877592	-0.0018996	-0.00154169	-0.0021119	-0.00221335	-0.00137752	-0.00112827	-0.000432978	-0.000547007	0.00424973	0.00342846	0.00110283	-0.000685826	-0.00203143	0.0024995
34	3.13782	2.82034	3.04107	3.28003	2.16911	3.3036	3.16533	3.04294	3.415	3.30533	3.5219	2.68608	3.49786	3.04407	3.63606	3.31886	3.12858	2.81192	2.73461		34	-0.000605447	-0.00170743	-0.00213308	-0.00123345	-0.00226437	-0.00149652	-0.00175748	-0.00207125	-0.00111285	-0.000911267	-0.000593082	-0.000679805	0.00305712	0.00249756	0.00101272	-0.000522067	-0.00147403	0.00197565
34.3333	3.13818	2.81912	3.04107	3.27864	2.16964	3.30464	3.17001	3.03919	3.40931	3.29392	3.51185	2.67757	3.51614	3.05603	3.63393	3.31086	3.12045	2.81546	2.71066		34.3333	-0.000353725	-0.00163423	-0.00196672	-0.00145737	-0.0028373	-0.00139446	-0.001075	-0.00236934	-0.0013995	-0.0020168	-0.00152883	-0.00164115	0.00247538	0.00123079	0.000120158	-0.00169304	-0.00293924	0.000900582
34.6667	3.13746	2.81791	3.03956	3.27899	2.16701	3.3036	3.16425	3.04144	3.41466	3.3074	3.52255	2.68565	3.50228	3.04733	3.63727	3.32053	3.13141	2.81624	2.73461		34.6667	-0.000557713	-0.00150763	-0.00197328	-0.00171595	-0.00308141	-0.00157085	-0.000991667	-0.0024941	-0.00120687	-0.00160762	-0.00120297	-0.00169823	0.000335327	-0.000316189	0.000130162	-0.00185185	-0.00232097	7.83624e-05
35	3.13709	2.81791	3.03994	3.27829	2.16648	3.30429	3.16821	3.03769	3.40798	3.29253	3.51055	2.67672	3.52022	3.06181	3.63667	3.3162	3.12292	2.81977	2.71554		35	-0.000773646	-0.00132115	-0.00187485	-0.00185952	-0.00302982	-0.00159381	-0.00111618	-0.00226573	-0.000871162	-0.00106744	-0.000503043	-0.00144671	0.000113403	-0.000882438	-0.000451284	-0.00240174	-0.00336625	-0.000614101
35.3333	3.136	2.81629	3.03806	3.27655	2.16385	3.30464	3.16749	3.03694	3.40998	3.29496	3.51282	2.67927	3.49407	3.04044	3.63606	3.3152	3.12717	2.81153	2.73097		35.3333	-0.00100757	-0.00122106	-0.00176369	-0.00204907	-0.0031184	-0.0016342	-0.00107512	-0.00211085	-0.000744191	-0.00056539	-0.00039059	-0.00136886	-0.00306951	-0.00347962	-0.00096267	-0.0030233	-0.0035952	-0.00205888
35.6667	3.13636	2.8171	3.03881	3.27655	2.16385	3.30118	3.16353	3.03844	3.41333	3.30464	3.52061	2.68523	3.52054	3.06145	3.63727	3.3182	3.12682	2.82173	2.7188		35.6667	-0.00118748	-0.000967596	-0.00157832	-0.00222171	-0.00340764	-0.00158874	-0.000778066	-0.0022352	-0.00103648	-0.00146063	-0.00105387	-0.0021345	-0.00124972	-0.00220859	-0.000421358	-0.001919	-0.00235851	-0.00145153
36	3.13527	2.8167	3.03694	3.27446	2.16279	3.30153	3.16209	3.03881	3.41433	3.30636	3.52028	2.68353	3.49533	3.03898	3.63332	3.31153	3.12328	2.80878	2.72692		36	-0.00119946	-0.000774143	-0.00167766	-0.00242885	-0.00355696	-0.00150372	-0.000581991	-0.00221669	-0.00110257	-0.00191004	-0.00143316	-0.00252739	-0.00103599	-0.00221232	-0.000606684	-0.00220513	-0.00282611	-0.00174233
36.3333	3.13746	2.8167	3.03694	3.27446	2.16174	3.30118	3.16785	3.0328	3.40831	3.29115	3.5099	2.67373	3.513	3.04842	3.63089	3.30752	3.11264	2.81074	2.70739		36.3333	-0.00107952	-0.00055403	-0.00154781	-0.00226266	-0.00363689	-0.00153789	-0.00073629	-0.00178366	-0.00102573	-0.00152226	-0.000914349	-0.00220517	-0.00330185	-0.00440931	-0.000561442	-0.00206789	-0.00250469	-0.00273393
36.6667	3.13382	2.8167	3.03618	3.27272	2.16015	3.30187	3.16677	3.0328	3.40931	3.29357	3.51217	2.67458	3.49723	3.04298	3.63727	3.3162	3.12788	2.81271	2.73137		36.6667	-0.000935663	-0.00040057	-0.00143048	-0.00221701	-0.00362216	-0.00148679	-0.000195864	-0.00167217	-0.00136203	-0.00217731	-0.00156151	-0.00265414	-0.00373023	-0.00483621	-0.000877133	-0.00287633	-0.003368	-0.00326584
37	3.13382	2.81589	3.03543	3.27377	2.16174	3.30049	3.16569	3.03468	3.40864	3.29288	3.51282	2.67501	3.51457	3.05168	3.63241	3.30819	3.11264	2.8131	2.70739		37	-0.000839758	-0.000413983	-0.00136871	-0.00202788	-0.00383361	-0.00155533	-0.000540422	-0.000984888	-0.00081619	-0.000142597	-0.000122877	-0.00150984	-0.00525806	-0.0058831	-0.000781899	-0.00245923	-0.00260992	-0.0033502
37.3333	3.13345	2.8167	3.03618	3.27272	2.15804	3.29842	3.16209	3.03656	3.41199	3.30498	3.51996	2.68098	3.48583	3.02988	3.63028	3.30652	3.11406	2.80484	2.7188		37.3333	-0.000827886	-0.000380658	-0.00113355	-0.00194231	-0.00372209	-0.00127057	5.35851e-05	-0.000898156	-0.00145623	-0.00125479	-0.00117207	-0.00234641	-0.00136138	-0.0025352	-7.52449e-05	-0.00171628	-0.0025798	-0.00167259
37.6667	3.13382	2.8167	3.03581	3.27098	2.15486	3.30015	3.16605	3.03205	3.40697	3.28941	3.50925	2.67117	3.49881	3.04298	3.63697	3.31586	3.12788	2.80917	2.72813		37.6667	-0.000683875	-0.00048751	-0.00105928	-0.00202908	-0.00376687	-0.000826333	0.000285336	-0.000749369	-0.00174308	-0.00170444	-0.00165336	-0.00250077	-0.00284084	-0.00344256	0.00056126	-0.00106126	-0.00138829	-0.00190527
38	3.13418	2.81629	3.03393	3.26993	2.15539	3.29842	3.16497	3.03355	3.40831	3.29392	3.51217	2.6733	3.51583	3.0506	3.63484	3.30719	3.11264	2.81192	2.70535		38	-0.00057592	-0.000520939	-0.00101624	-0.0018513	-0.0035325	-0.000934704	-0.000112765	-4.31401e-05	-0.00113633	8.02299e-05	-0.000294527	-0.000906761	0.00120056	0.000376678	0.00168327	0.000385077	-0.000220125	0.000328406
38.3333	3.13455	2.81589	3.03506	3.27133	2.15433	3.29946	3.16461	3.03393	3.4063	3.29288	3.51249	2.6733	3.49154	3.02915	3.63393	3.30819	3.11797	2.80405	2.72124		38.3333	-0.000467891	-0.00060112	-0.00100393	-0.00194368	-0.00320189	-0.000763725	-0.000237646	0.000390449	-0.000949457	0.000455269	-7.56932e-05	-0.000486264	0.000273329	-0.00042295	0.002019	0.000831134	0.00091331	0.000225483
38.6667	3.13382	2.81589	3.03393	3.27028	2.15221	3.29842	3.16605	3.03355	3.40731	3.29357	3.51087	2.6733	3.48774	3.0306	3.63241	3.30618	3.11371	2.80326	2.71839		38.6667	-0.000228085	-0.000561048	-0.000997878	-0.00175987	-0.00305498	-0.00086079	-0.000208047	0.000508129	-0.000816865	0.0010139	0.000336183	4.10757e-05	0.00124353	0.000148609	0.00222877	0.000946691	0.000843037	0.000219784
39	3.13345	2.81507	3.03393	3.26993	2.15009	3.29738	3.16317	3.03581	3.40965	3.30498	3.51931	2.67927	3.48805	3.03024	3.63241	3.30652	3.11619	2.80484	2.71798		39	-0.000396172	-0.000534348	-0.0010724	-0.00176577	-0.00270639	-0.000655685	0.000243483	0.00014867	-0.00103222	-0.000155855	-0.000279116	-0.000324107	0.0030459	0.0022071	0.0031251	0.00213465	0.00212744	0.00176126
39.3333	3.13236	2.81507	3.03431	3.26819	2.15115	3.29911	3.16785	3.03318	3.40463	3.29011	3.50762	2.66861	3.5196	3.05494	3.63849	3.31253	3.11619	2.81663	2.7078		39.3333	-0.000492212	-0.000728138	-0.00119029	-0.00154747	-0.00189553	-0.000467562	2.36059e-05	0.000377993	-0.000734051	0.000312476	0.000395296	0.000343909	0.00304152	0.00169045	0.00237894	0.00125977	0.000941375	0.00137885
39.6667	3.13418	2.81507	3.03393	3.26679	2.15009	3.29946	3.16497	3.03393	3.4053	3.29357	3.51022	2.67117	3.49565	3.03571	3.63879	3.3122	3.12186	2.80641	2.72286		39.6667	-0.000456174	-0.000781669	-0.00114705	-0.00136361	-0.00148561	-0.000444717	-5.37305e-05	0.00049575	-0.000447339	0.000396961	0.000582326	0.000681126	0.00293485	0.000985412	0.00173757	0.000462028	-0.000209572	0.000912827
40	3.13309	2.81467	3.03205	3.26784	2.15062	3.29703	3.16281	3.03731	3.40965	3.30464	3.51931	2.68055	3.52085	3.0582	3.64274	3.3162	3.12115	2.8186	2.71147		40	-0.000378127	-0.000815186	-0.00117209	-0.00134074	-0.00150364	-0.000325014	-0.000434253	0.000477039	-0.000287139	0.000488446	0.000881909	0.00101834	0.00235744	0.0010675	0.00232828	0.0014083	0.00116225	0.00105663
40.3333	3.13382	2.81426	3.0328	3.26609	2.15062	3.29876	3.16713	3.03393	3.40362	3.28837	3.50794	2.66989	3.50007	3.03716	3.64031	3.31353	3.12399	2.80956	2.72489		40.3333	-0.000180063	-0.000868749	-0.00131479	-0.00127744	-0.00106681	-0.00018815	-0.000131138	0.000105202	-0.000585466	-0.000858615	0.000282931	0.00059715	0.0026605	0.000948067	0.00191303	0.000538941	9.8713e-05	0.000694115
40.6667	3.13236	2.81507	3.03205	3.26749	2.14797	3.296	3.16281	3.03694	3.40831	3.30498	3.51996	2.68012	3.49944	3.03971	3.64304	3.3152	3.12434	2.80838	2.72529		40.6667	2.39976e-05	-0.000982492	-0.00151993	-0.00105896	-0.000551093	-1.13869e-05	-0.000517373	0.000204386	-0.000347963	-0.000458067	0.000764985	0.00099103	0.00332924	0.000679016	0.00169272	0.000187184	-0.000625827	0.000681246
41	3.13163	2.81467	3.0313	3.26644	2.14956	3.29738	3.16749	3.0328	3.40362	3.28698	3.5086	2.67117	3.52399	3.05964	3.64456	3.3172	3.12222	2.82134	2.71066		41	0.000192058	-0.00102271	-0.00179948	-0.000863396	-0.000271236	6.27659e-05	-0.000755135	0.000365407	3.30286e-05	-0.000160032	0.000851081	0.00126548	0.000438711	-0.00162708	0.0011617	-0.000704207	-0.00139103	-0.000505039
41.3333	3.132	2.81305	3.03092	3.26644	2.15062	3.29807	3.16209	3.03656	3.40864	3.30326	3.52028	2.68055	3.48995	3.02623	3.63484	3.30585	3.11406	2.80287	2.71717		41.3333	0.000204085	-0.00108293	-0.00191762	-0.000558419	-9.62588e-05	1.71682e-05	-0.00120081	0.000786637	0.000651267	0.00135771	0.00185195	0.00215123	-0.00257696	-0.00408349	8.00223e-05	-0.00178839	-0.00217971	-0.00163928
41.6667	3.13345	2.81305	3.03092	3.26609	2.14903	3.29842	3.16713	3.03355	3.40463	3.28698	3.50827	2.67117	3.51834	3.04552	3.63879	3.30819	3.113	2.80996	2.7029		41.6667	0.000132069	-0.0012034	-0.00198632	-0.000356942	0.000131191	0.000393402	-0.000499561	0.000371564	0.000132359	-0.000537423	0.000546056	0.00080834	0.000823299	-0.00101945	0.000355054	-0.0014469	-0.00262907	-0.000142608
42	3.13345	2.81264	3.02979	3.26539	2.14691	3.29738	3.16028	3.03694	3.40798	3.30222	3.51996	2.68098	3.50386	3.0408	3.64486	3.3152	3.12222	2.81192	2.72408		42	0.000288124	-0.0012838	-0.00191837	-0.000287839	0.000349869	0.000781041	-0.00043394	-6.31001e-06	-0.000226356	-0.00159201	-0.000293644	-2.76452e-05	-0.00104984	-0.00246034	0.000515099	-0.00142442	-0.00223717	-0.000595429
42.3333	3.13418	2.81224	3.02979	3.26609	2.14956	3.29911	3.16749	3.03242	3.40194	3.28455	3.50925	2.67245	3.49375	3.02951	3.63849	3.30685	3.11442	2.80405	2.7192		42.3333	0.00043215	-0.00132404	-0.00208629	-0.000161202	0.000498629	0.000695534	-0.000915364	0.000198227	0.000364343	-7.35526e-05	0.000862038	0.000682394	0.00246368	0.00131308	0.00123029	-0.000654173	-0.00199136	0.0013662
42.6667	3.13382	2.81142	3.02715	3.26539	2.15062	3.29842	3.16136	3.03656	3.40864	3.30187	3.51931	2.68055	3.52211	3.04951	3.64213	3.31086	3.11193	2.81546	2.70657		42.6667	0.00102587	-0.00169247	-0.0018567	0.000350849	0.0014852	0.000843794	-0.000820328	0.000192095	0.000309123	-0.000249682	0.000615598	0.00027454	0.00272091	0.00131093	0.00122557	-0.000940419	-0.00227986	0.00102406
43	3.13418	2.81142	3.0264	3.26539	2.15009	3.29842	3.16064	3.03806	3.40931	3.30153	3.51834	2.68055	3.49565	3.0306	3.64213	3.30819	3.11548	2.80641	2.72164		43	0.00115182	-0.00155218	-0.00175758	0.000281769	0.00118808	0.000826499	-0.000653663	-7.44878e-05	0.000209813	-0.00039392	0.0004604	4.25641e-05	0.00136424	0.000662381	0.00189571	-0.000175455	-0.00107603	0.000694791
43.3333	3.13309	2.81142	3.02678	3.26609	2.15115	3.29842	3.161	3.03881	3.40931	3.30187	3.51899	2.68098	3.49533	3.02951	3.63818	3.30618	3.11264	2.80563	2.71839		43.3333	0.00101377	-0.00115757	-0.00166463	0.000276088	0.00108347	0.00063839	-0.000451679	-0.000167404	0.000138033	-0.000690059	0.000390413	-0.000231516	0.0054437	0.00463156	0.00301526	0.00115555	-1.21262e-05	0.00293395
43.6667	3.13345	2.81021	3.02565	3.26644	2.15062	3.30084	3.16677	3.03393	3.40362	3.28421	3.50925	2.67117	3.52462	3.05639	3.64577	3.31353	3.11548	2.8186	2.71106		43.6667	0.000815762	-0.000849782	-0.00165257	0.000207062	0.0010226	0.000638388	-0.000725003	6.81503e-05	0.000557645	0.000782764	0.00142284	0.000351904	0.00268651	0.00234951	0.00250441	0.000737335	7.59856e-05	0.00177397
44	3.13382	2.8098	3.02602	3.26644	2.15168	3.30084	3.16353	3.03355	3.40429	3.28768	3.5112	2.67373	3.50007	3.03352	3.64547	3.31086	3.11726	2.81114	2.72489		44	0.00130712	-0.00111792	-0.00117431	0.0007364	0.00145902	0.000809291	-7.701e-05	-0.000563962	-5.51347e-05	-0.00133028	0.000122743	-0.00100494	0.00575558	0.00472318	0.00283308	0.000995762	6.45704e-05	0.00266663
44.3333	3.13491	2.8098	3.02451	3.26574	2.15062	3.29911	3.16028	3.03543	3.40864	3.2998	3.52093	2.67885	3.52587	3.05964	3.64759	3.31353	3.11584	2.82212	2.71188		44.3333	0.00181624	-0.00130566	-0.000640026	0.00112756	0.00161512	0.000661057	-0.000564581	-0.000396521	0.000403096	0.000125806	0.00126706	-0.000407469	0.00442707	0.00370425	0.00337289	0.00153507	0.000935476	0.00231195
44.6667	3.13891	2.80614	3.0264	3.27133	2.15909	3.2998	3.16064	3.03694	3.40898	3.30084	3.52028	2.6797	3.51803	3.04625	3.64395	3.30551	3.10625	2.80996	2.70371		44.6667	0.00193624	-0.00101778	-0.000366793	0.000834141	0.00115234	0.000894583	0.000457645	-0.00116512	-0.000530131	-0.00207884	-0.000102434	-0.00154624	0.00434858	0.00403974	0.00336667	0.00182033	0.00131561	0.00218065
45	3.13673	2.80899	3.02489	3.26469	2.15062	3.30153	3.16533	3.0313	3.40396	3.28386	3.50925	2.67117	3.50544	3.03825	3.6482	3.31286	3.11797	2.81153	2.7257		45	0.00189435	-0.00065623	-0.000236258	0.000333373	0.000733312	0.000945774	0.000422129	-0.00112778	-0.000712306	-0.0019357	4.25814e-05	-0.00158152	0.00469019	0.00366775	0.00345621	0.00213949	0.00142642	0.00204616
45.3333	3.13564	2.81102	3.02451	3.26609	2.15115	3.29911	3.16064	3.03694	3.40898	3.2998	3.52158	2.6797	3.53276	3.06145	3.65183	3.31586	3.11797	2.82291	2.71473		45.3333	0.00199021	-0.0002813	-0.000310863	6.29988e-05	0.000200596	0.000888732	-1.78301e-05	-0.000458639	-0.000198845	-0.000399386	0.000914429	-0.000955759	0.00347061	0.00198823	0.00308165	0.00100052	0.000114796	0.00083578
45.6667	3.13527	2.81142	3.023	3.26539	2.15062	3.30049	3.161	3.03656	3.40898	3.30084	3.52125	2.67885	3.50481	3.03753	3.64789	3.31119	3.1169	2.81035	2.72529		45.6667	0.00181621	0.00010701	-0.000149229	-0.000276493	-0.000104766	0.000660801	-0.000309059	0.000340491	0.000292545	0.00137621	0.00175429	-0.000126372	0.000753366	-0.000739686	0.00270004	0.000856953	0.000459808	-0.000284308
46	3.14109	2.80533	3.0264	3.27168	2.15751	3.30222	3.16425	3.0313	3.40329	3.28316	3.51185	2.66989	3.53307	3.06397	3.65395	3.3162	3.11761	2.82408	2.71473		46	0.00213869	6.64702e-06	0.000204996	6.88805e-05	2.28908e-07	0.000865848	0.000624023	0.000142367	-0.000452909	-0.000354178	0.000449267	-0.00112498	0.00334096	0.00206045	0.0032078	0.00146734	0.000770328	0.000486199
46.3333	3.14254	2.80533	3.02753	3.27202	2.15857	3.30084	3.16028	3.03506	3.40998	3.30084	3.52352	2.67799	3.50796	3.03825	3.65153	3.3122	3.11655	2.81153	2.72732		46.3333	0.00204301	0.000127844	0.00034401	-2.57205e-05	-0.000177294	0.00102953	0.000892714	3.14475e-05	-0.00086093	-0.00125695	-0.000255204	-0.00159249	0.00167832	0.000490848	0.00327591	0.00150037	0.00110746	-2.3323e-05
46.6667	3.13927	2.8094	3.02451	3.26539	2.15115	3.30326	3.16713	3.03054	3.40329	3.28421	3.5112	2.66989	3.53307	3.06469	3.65455	3.31886	3.11974	2.82291	2.71514		46.6667	0.00195195	0.000321397	0.000308407	-0.00029516	-0.000634916	0.000961314	0.000757185	0.000153826	-0.000776595	-0.000698252	0.000186041	-0.00144205	0.00305746	0.00214132	0.00355711	0.00191001	0.00137273	0.000932822
47	3.13891	2.81061	3.02527	3.26399	2.15062	3.30291	3.16353	3.03355	3.40329	3.28768	3.51509	2.67117	3.51079	3.04007	3.65395	3.31653	3.1208	2.81271	2.72773		47	0.00246412	-9.58872e-05	0.000603232	0.000374459	0.000308444	0.000917306	0.000543987	0.000656306	-0.000511702	0.000524131	0.000808839	-0.000914833	0.00367507	0.0021804	0.0030798	0.00088973	-0.000177408	9.45694e-05
47.3333	3.14073	2.81061	3.02376	3.26609	2.15009	3.30257	3.16064	3.03769	3.40864	3.2998	3.52287	2.67629	3.52399	3.04733	3.65122	3.30585	3.10375	2.81192	2.70371		47.3333	0.00265237	-0.000141781	0.000716402	-8.73803e-05	-0.000105572	0.00119225	0.00128007	0.000112746	-0.00123937	-0.00152349	-0.000875872	-0.00200419	0.0013538	7.22031e-05	0.00300904	0.00078202	-7.46188e-05	-0.00105689
47.6667	3.14036	2.81061	3.02527	3.26469	2.15115	3.30153	3.16173	3.03806	3.40831	3.30153	3.52255	2.67714	3.51394	3.0408	3.65727	3.31786	3.12186	2.81467	2.72935		47.6667	0.00238718	0.00043578	0.000740702	-0.000535988	-0.000737011	0.000826775	0.00108158	0.000845921	-0.000921145	-0.000257886	-0.000127251	-0.00118791	0.00543185	0.0033783	0.00371562	0.00145134	0.000135283	0.000451516
48	3.14617	2.80696	3.02828	3.27098	2.15592	3.3036	3.16749	3.03355	3.40228	3.28664	3.51282	2.66946	3.53651	3.06722	3.6606	3.31886	3.11974	2.82016	2.71473		48	0.00132193	0.00178509	4.01418e-05	-0.00172016	-0.00221213	0.000518208	0.000656433	0.00213515	-0.000107636	0.00293542	0.00135626	0.000365965	0.00141396	-0.000271573	0.00301179	0.000676944	0.000109914	-0.00176217

## Sheet: Radius-slope 70s
t (h)	Radius [mm]																			t (h)	Slope
3	0.719698	0.654963												0.67644	0.67644	0.72227	0.642931			3
3.33333	0.855835	0.836964	0.678912	0.73227	0.668753	0.633715			0.640876	0.647957	0.609862			0.818399	0.80065	0.843668	0.864375	0.583451		3.33333
3.66667	0.9625	0.949371	0.786361	0.876905	0.803583	0.809242	0.656702		0.770237	0.762795	0.73693	0.711728	0.721282	0.93914	0.909242	0.979464	0.988451	0.731394		3.66667
4	1.05955	1.04872	0.879503	0.993989	0.905075	0.912607	0.786361		0.879503	0.863796	0.839686	0.817657	0.845103	1.05341	1.03006	1.10061	1.12544	0.835771		4
4.33333	1.1514	1.13443	0.969586	1.09659	0.995136	1.00654	0.887252	0.642653	0.967229	0.950572	0.943343	0.910104	0.932395	1.16974	1.14201	1.24303	1.23142	0.940316		4.33333	0.286485	0.281032	0.27412	0.294101	0.269195	0.276112	0.276141	0.253481	0.272488	0.268613	0.280224	0.252936	0.261861	0.311509	0.308945	0.341812	0.306729	0.279311
4.66667	1.23367	1.21504	1.06599	1.1942	1.08718	1.0945	0.971936	0.747688	1.05415	1.03889	1.04545	0.998569	1.02562	1.25981	1.2457	1.35124	1.32398	1.01928		4.66667	0.286485	0.281032	0.27412	0.294101	0.269195	0.276112	0.276141	0.253481	0.272077	0.267555	0.275764	0.250453	0.259879	0.306486	0.301992	0.332244	0.296133	0.275103
5	1.32809	1.30031	1.14743	1.28531	1.17007	1.17785	1.06062	0.836964	1.14045	1.12737	1.13443	1.08087	1.10488	1.37154	1.34304	1.47183	1.4136	1.11359		5	0.285082	0.27781	0.27689	0.289775	0.266964	0.268934	0.275677	0.251698	0.272434	0.266908	0.272344	0.248786	0.258717	0.302299	0.296287	0.323517	0.288168	0.270699
5.33333	1.41461	1.3828	1.23552	1.3712	1.25021	1.2584	1.14444	0.917594	1.22346	1.2141	1.22532	1.16126	1.18653	1.46505	1.44301	1.57696	1.49492	1.19775		5.33333	0.278583	0.26429	0.277332	0.286093	0.265382	0.263588	0.275391	0.250971	0.273906	0.266382	0.268328	0.248283	0.25876	0.291932	0.285704	0.308582	0.264195	0.267975
5.66667	1.51131	1.46921	1.32034	1.45986	1.32981	1.34431	1.24013	0.99284	1.30119	1.30206	1.30993	1.24381	1.26743	1.55081	1.53217	1.67088	1.57134	1.28586		5.66667	0.275498	0.259727	0.2765	0.27518	0.258248	0.249431	0.274609	0.249003	0.271711	0.262329	0.258858	0.247761	0.258229	0.285254	0.276142	0.293084	0.252202	0.258318
6	1.61284	1.56326	1.41783	1.55154	1.41864	1.42506	1.32292	1.0777	1.39512	1.3828	1.38445	1.31601	1.35108	1.6395	1.62392	1.76105	1.65292	1.3667		6	0.27229	0.256468	0.276712	0.268045	0.254578	0.243812	0.270258	0.24684	0.272786	0.261805	0.253977	0.244125	0.252818	0.280268	0.267408	0.279611	0.243343	0.254826
6.33333	1.70833	1.65611	1.52035	1.64436	1.50526	1.50905	1.41542	1.1593	1.49079	1.4661	1.45359	1.39512	1.44335	1.73194	1.70428	1.84383	1.72747	1.44989		6.33333	0.268203	0.253438	0.275614	0.262359	0.251968	0.239525	0.269481	0.244461	0.275812	0.262648	0.250223	0.241412	0.250639	0.275225	0.259489	0.265734	0.238775	0.25146
6.66667									1.58285	1.56034	1.54934	1.47695	1.52185	1.82273	1.7804	1.92478	1.7977	1.53361		6.66667	0.262815	0.249022	0.27252	0.256573	0.24868	0.235717	0.269376	0.239052	0.278718	0.263057	0.247597	0.238625	0.24802	0.272498	0.25375	0.256539	0.236174	0.250954
7	1.88971	1.83083	1.715	1.82834	1.68141	1.66641	1.60361	1.32637	1.67869	1.64921	1.63392	1.55815	1.60788	1.91326	1.86588	2.00576	1.88063	1.60819		7	0.255612	0.242798	0.268807	0.250602	0.245213	0.232138	0.267998	0.234839	0.28093	0.261874	0.245472	0.23639	0.245599	0.26966	0.24949	0.248138	0.234029	0.249622
7.33333	1.97473	1.90893	1.7994	1.91132	1.76613	1.7401	1.69492	1.40976	1.7822	1.73681	1.70499	1.64505	1.7003	2.00797	1.95328	2.0889	1.96006	1.69778		7.33333	0.247193	0.234782	0.263427	0.24429	0.241075	0.227931	0.265822	0.230822	0.282231	0.260697	0.243227	0.232717	0.242091	0.26933	0.247398	0.242413	0.232754	0.249537
7.66667	2.05514	1.98568	1.89092	1.98855	1.84696	1.81895	1.78092	1.48235	1.88124	1.82021	1.78796	1.72561	1.78092	2.10156	2.0315	2.16936	2.04235	1.78226		7.66667	0.237034	0.22505	0.256279	0.236675	0.235257	0.222243	0.261822	0.225464	0.28118	0.259296	0.241817	0.227979	0.236861	0.268933	0.246909	0.238469	0.231687	0.25104
8	2.12823	2.05736	1.9782	2.06234	1.91847	1.89152	1.86968	1.55595	1.97011	1.91728	1.88245	1.80637	1.8519	2.19166	2.11832	2.25235	2.12561	1.8718		8	0.225652	0.214505	0.246973	0.227972	0.227484	0.216136	0.257349	0.218176	0.278222	0.25736	0.240292	0.222877	0.23065	0.264524	0.243496	0.233426	0.228103	0.24984
8.33333	2.19889	2.12715	2.05514	2.13572	1.99542	1.96314	1.95616	1.62692	2.06234	2.00569	1.96489	1.87455	1.92855	2.26653	2.18712	2.31908	2.19871	1.94136		8.33333	0.214299	0.203307	0.23601	0.218563	0.218876	0.210059	0.250779	0.210066	0.273533	0.253805	0.237695	0.216527	0.223601	0.259115	0.240834	0.229264	0.223659	0.247819
8.66667	2.26684	2.19161	2.12501	2.20407	2.06455	2.03281	2.04009	1.69761	2.15592	2.09036	2.04289	1.94211	2.00284	2.35642	2.2714	2.40333	2.27383	2.03258		8.66667	0.202527	0.192133	0.225921	0.209848	0.209049	0.204136	0.243427	0.201846	0.268737	0.24773	0.231252	0.209915	0.217719	0.253297	0.237764	0.225434	0.218538	0.245516
9	2.33771	2.25473	2.19785	2.27237	2.13305	2.10342	2.12017	1.76289	2.24561	2.16121	2.11208	2.01647	2.07448	2.44798	2.35361	2.4785	2.3442	2.11414		9	0.200922	0.1916	0.224934	0.209855	0.20884	0.204018	0.242856	0.201441	0.262082	0.242334	0.226464	0.203225	0.210348	0.247039	0.232466	0.221601	0.212254	0.243002
9.33333	2.40031	2.3112	2.27488	2.34307	2.20407	2.16859	2.19992	1.83021	2.33429	2.2451	2.18483	2.07558	2.14584	2.54103	2.44663	2.55275	2.41846	2.19921		9.33333	0.195025	0.187521	0.221462	0.207276	0.206224	0.202137	0.240175	0.198681	0.256124	0.23818	0.223261	0.198196	0.204546	0.240371	0.228058	0.21706	0.206525	0.239429
9.66667	2.46457	2.3697	2.34453	2.40886	2.26785	2.22673	2.27488	1.88971	2.41264	2.32793	2.26231	2.13679	2.20666	2.62616	2.53013	2.62826	2.49317	2.29801		9.66667	0.18907	0.183046	0.21642	0.203834	0.203972	0.199337	0.236577	0.195609	0.2526	0.233841	0.218639	0.195186	0.202367	0.232265	0.221978	0.211044	0.199536	0.234237
10	2.52132	2.43195	2.415	2.47289	2.32989	2.28689	2.34891	1.94915	2.50088	2.40554	2.33527	2.19941	2.27237	2.67908	2.57774	2.68279	2.54494	2.35126		10	0.18282	0.178238	0.211167	0.199755	0.200841	0.195958	0.231641	0.191455	0.24778	0.22913	0.2148	0.191967	0.199506	0.227542	0.218563	0.207796	0.194899	0.23075
10.3333	2.58036	2.48532	2.47658	2.53576	2.39174	2.35521	2.42255	2.00796	2.57372	2.47888	2.40838	2.26181	2.3338	2.75354	2.65254	2.75514	2.60333	2.42622		10.3333	0.176076	0.173011	0.205243	0.194239	0.196307	0.19139	0.225659	0.185605	0.242171	0.222966	0.209908	0.189776	0.196796	0.224402	0.217393	0.20741	0.19281	0.229245
10.6667	2.63851	2.5425	2.55235	2.60763	2.45204	2.41972	2.49859	2.07613	2.65747	2.53891	2.45947	2.32449	2.40174	2.82721	2.72611	2.8276	2.66791	2.5029		10.6667	0.168115	0.167105	0.198524	0.187417	0.191074	0.185828	0.218492	0.178706	0.234556	0.216503	0.205915	0.18582	0.192238	0.218954	0.212477	0.204472	0.188909	0.224892
11	2.7106	2.61898	2.63158	2.68565	2.53846	2.49722	2.58919	2.15115	2.72571	2.61462	2.53216	2.38314	2.45483	2.89939	2.78507	2.8971	2.73097	2.57859		11	0.15925	0.160174	0.189597	0.179632	0.184595	0.179403	0.209994	0.17133	0.227205	0.20878	0.200405	0.18063	0.187695	0.214434	0.208161	0.202064	0.184866	0.221977
11.3333	2.76354	2.67544	2.70681	2.7503	2.61025	2.56528	2.66861	2.21903	2.81142	2.69921	2.61331	2.45623	2.52584	2.96908	2.86179	2.95751	2.79536	2.65504		11.3333	0.150658	0.152652	0.179869	0.169955	0.176432	0.172057	0.20049	0.163162	0.218035	0.198662	0.192929	0.17486	0.182264	0.208852	0.201802	0.196935	0.179457	0.215386
11.6667	2.8094	2.7211	2.75775	2.79841	2.66989	2.61985	2.73031	2.26735	2.90405	2.77014	2.67927	2.52494	2.60763	3.02001	2.90891	3.00423	2.84242	2.70862		11.6667	0.141591	0.144206	0.169741	0.160051	0.167984	0.163725	0.190066	0.154519	0.208302	0.187707	0.184054	0.168059	0.17661	0.202941	0.195006	0.190317	0.172912	0.206716
12	2.85172	2.76354	2.80858	2.84972	2.71733	2.66861	2.78902	2.31466	2.96239	2.8413	2.75278	2.57549	2.6579	3.11371	3.00386	3.09091	2.91725	2.79576		12	0.132271	0.135178	0.158913	0.149856	0.159069	0.153841	0.179516	0.144556	0.197565	0.176149	0.173593	0.160069	0.170582	0.199082	0.189702	0.184932	0.168044	0.201281
12.3333	2.89421	2.80533	2.85292	2.89263	2.76478	2.71354	2.8429	2.35036	3.03092	2.88354	2.7927	2.63332	2.72278	3.19327	3.08733	3.17661	2.9917	2.88027		12.3333	0.122495	0.125852	0.147712	0.138405	0.148752	0.143042	0.167824	0.134443	0.186377	0.164707	0.164399	0.151611	0.163055	0.190038	0.179376	0.175925	0.159497	0.190877
12.6667	2.92713	2.8417	2.9009	2.9322	2.80899	2.75692	2.89224	2.38936	3.07984	2.93841	2.85731	2.67373	2.75982	3.24954	3.1307	3.22701	3.03243	2.93839		12.6667	0.113349	0.116168	0.135968	0.127026	0.137887	0.132215	0.156088	0.123447	0.174607	0.152988	0.153947	0.142317	0.155216	0.180679	0.169063	0.166286	0.149872	0.180337
13	2.96008	2.87522	2.93803	2.97546	2.85132	2.79922	2.93686	2.42914	3.14291	2.98235	2.89972	2.71565	2.81183	3.31786	3.19569	3.28539	3.08231	3.01268		13	0.104551	0.105945	0.124944	0.116334	0.126323	0.121887	0.144199	0.113133	0.163182	0.141075	0.14254	0.133368	0.146578	0.170542	0.158299	0.156185	0.140108	0.169334
13.3333	2.99571	2.90954	2.98044	3.00521	2.88552	2.83527	2.98273	2.46689	3.18438	3.02414	2.94191	2.75195	2.85412	3.36056	3.23317	3.3172	3.12115	3.04371		13.3333	0.0984262	0.0986641	0.11609	0.107788	0.116833	0.11384	0.13533	0.105119	0.151534	0.129444	0.131101	0.12377	0.138293	0.160272	0.145925	0.146048	0.130459	0.157686
13.6667	3.02753	2.94346	3.01696	3.04257	2.92518	2.87125	3.02414	2.50088	3.23168	3.06163	2.9812	2.79515	2.89854	3.40077	3.26684	3.35529	3.15251	3.07837		13.6667	0.09258	0.0923033	0.109233	0.100743	0.109191	0.106979	0.128108	0.0985646	0.141677	0.120778	0.121785	0.115948	0.131215	0.149939	0.135028	0.135589	0.120848	0.147082
14	3.05454	2.97469	3.0523	3.07947	2.96624	2.90483	3.07279	2.5299	3.27969	3.09499	3.00749	2.83164	2.94927	3.46548	3.32119	3.41342	3.20467	3.14233		14	0.0871045	0.0860074	0.102	0.0934781	0.102527	0.10113	0.121439	0.0924575	0.135169	0.11398	0.113656	0.110274	0.126959	0.136966	0.122232	0.123176	0.111117	0.134209
14.3333	3.08206	2.99989	3.08428	3.10382	2.99609	2.93841	3.10786	2.56573	3.3167	3.13345	3.05939	2.86966	2.9812	3.49122	3.34672	3.44405	3.22564	3.17069		14.3333	0.0816958	0.0794771	0.0952241	0.0864075	0.0953809	0.0951424	0.115137	0.0865237	0.128489	0.109531	0.10882	0.104947	0.12124	0.127041	0.112973	0.113835	0.102915	0.123271
14.6667	3.113	3.02866	3.11849	3.13636	3.02941	2.96701	3.14798	2.59095	3.3618	3.16641	3.08206	2.90011	3.02451	3.53651	3.38775	3.48012	3.26006	3.21844		14.6667	0.0764791	0.0733796	0.0881784	0.0794713	0.0877998	0.0892565	0.10913	0.0794437	0.123503	0.104325	0.102322	0.100532	0.11803	0.119487	0.107468	0.108085	0.098201	0.115542
15	3.13746	3.04706	3.14436	3.15956	3.05827	2.99875	3.17864	2.61549	3.39892	3.209	3.12507	2.93686	3.0523	3.5732	3.41989	3.51174	3.29278	3.25633		15	0.0706906	0.0671654	0.0814578	0.0723476	0.0805729	0.0831958	0.102971	0.0725543	0.117976	0.100558	0.0983438	0.0957549	0.113833	0.114001	0.102967	0.104061	0.0942426	0.109817
15.3333	3.16353	3.07168	3.17253	3.18223	3.07947	3.02791	3.21682	2.6411	3.44063	3.23521	3.15088	2.96393	3.10235	3.61196	3.45046	3.54432	3.32452	3.28707		15.3333	0.0644016	0.0608097	0.0740939	0.0659203	0.0734272	0.0770936	0.096528	0.0657869	0.113408	0.0971048	0.0951926	0.0916099	0.109329	0.109802	0.0994167	0.100793	0.090114	0.106381
15.6667	3.18008	3.09056	3.19511	3.20473	3.10456	3.04893	3.24542	2.65833	3.47789	3.26993	3.18079	2.99342	3.13964	3.6488	3.48678	3.57846	3.3487	3.32651		15.6667	0.0580059	0.0546789	0.0669893	0.0592194	0.0655349	0.0708301	0.089954	0.0591878	0.108326	0.0937268	0.0920806	0.0867244	0.104304	0.10468	0.0950698	0.0960507	0.0858108	0.100376
16	3.19975	3.10713	3.21327	3.22213	3.12726	3.07613	3.27516	2.6797	3.51477	3.30118	3.21043	3.02451	3.17505	3.67596	3.51677	3.60768	3.38481	3.35299		16	0.0516619	0.0488566	0.0600064	0.0531327	0.0577105	0.0643087	0.0832636	0.0526482	0.103688	0.0894658	0.0883857	0.0818233	0.100387	0.0996693	0.0900261	0.0906929	0.0809107	0.0935815
16.3333	3.21611	3.11959	3.2345	3.23485	3.14327	3.09388	3.30118	2.69498	3.54676	3.33043	3.24647	3.0523	3.19618	3.7068	3.54307	3.63818	3.40337	3.37827		16.3333	0.0454695	0.0434189	0.0532488	0.0475197	0.0509964	0.0581682	0.077541	0.0461337	0.0991219	0.0848492	0.083751	0.077134	0.0965691	0.0980453	0.0875448	0.0880529	0.0780794	0.0903497
16.6667	3.22921	3.13455	3.25104	3.25033	3.1545	3.11336	3.32666	2.70512	3.58133	3.355	3.26539	3.07353	3.23556	3.73679	3.57351	3.66572	3.4328	3.40921		16.6667	0.0393326	0.0380956	0.0468238	0.0417173	0.0440358	0.0522828	0.0715462	0.0408294	0.0940862	0.0797654	0.0805633	0.072848	0.0921617	0.0946258	0.0836213	0.0847115	0.0744654	0.0854818
17	3.24084	3.14581	3.26469	3.2619	3.17145	3.12762	3.3482	2.72068	3.61052	3.38412	3.29426	3.09609	3.26784	3.78265	3.61411	3.70591	3.46644	3.44982		17	0.0343681	0.0334818	0.041049	0.0364224	0.0377156	0.0459966	0.0661002	0.0355698	0.0890136	0.0740886	0.0760076	0.0677929	0.0882529	0.0911403	0.0795563	0.0806196	0.0707429	0.0808362
17.3333	3.24963	3.15595	3.27551	3.27342	3.1833	3.13964	3.36926	2.73073	3.63508	3.41032	3.32597	3.12397	3.28872	3.8048	3.62845	3.72524	3.47885	3.47154		17.3333	0.0271045	0.0277982	0.0340252	0.0312519	0.0321632	0.040763	0.0613625	0.0306374	0.0834038	0.0692041	0.0725101	0.0633328	0.0834016	0.0877103	0.0753938	0.0757053	0.0670013	0.0766269
17.6667	3.25524	3.16497	3.2849	3.28559	3.19118	3.15269	3.38648	2.73866	3.66353	3.43366	3.3482	3.14218	3.3136	3.82681	3.6488	3.74654	3.49786	3.48583		17.6667	0.0245778	0.0238661	0.0300554	0.0272022	0.0267583	0.035368	0.0558418	0.0263828	0.0781095	0.0635964	0.0679139	0.0585478	0.0797132	0.0834215	0.0695871	0.0697305	0.0620852	0.0709886
18	3.2619	3.17109	3.29426	3.29496	3.19654	3.161	3.40429	2.7449	3.69269	3.44924	3.36417	3.15667	3.34956	3.85873	3.67175	3.76743	3.51803	3.51111		18	0.0213316	0.0200429	0.0257654	0.0233458	0.0221832	0.0304259	0.0510125	0.0220225	0.0727834	0.0585637	0.0635142	0.0538566	0.0752934	0.0793684	0.0648178	0.0643543	0.0569973	0.0665152
18.3333	3.27098	3.17649	3.30153	3.29876	3.20509	3.17397	3.42067	2.75195	3.71425	3.47133	3.38783	3.17649	3.36655	3.89381	3.70173	3.79578	3.53901	3.54463		18.3333	0.0186499	0.0167793	0.021555	0.0201046	0.0185055	0.0262708	0.0464793	0.018523	0.0678693	0.0533173	0.0585733	0.0495379	0.0716027	0.0746944	0.0599947	0.0586663	0.0531732	0.0616681
18.6667	3.27551	3.18187	3.30912	3.30498	3.20758	3.18223	3.43498	2.75941	3.73875	3.48445	3.4053	3.19368	3.39288	3.91701	3.72079	3.81669	3.56236	3.56205		18.6667	0.0166173	0.0137563	0.0180273	0.0169819	0.0153331	0.0223435	0.0421451	0.0152555	0.0626777	0.0481343	0.0547057	0.0452292	0.0666498	0.0687881	0.0537369	0.0524157	0.0472027	0.0553736
19	3.28351	3.18581	3.31326	3.30567	3.21043	3.18545	3.44824	2.76271	3.7561	3.4985	3.42267	3.20438	3.416	3.93447	3.73384	3.82912	3.57722	3.57382		19	0.0148647	0.0113968	0.0150807	0.0142227	0.0123783	0.0190599	0.037869	0.0121704	0.0574424	0.043125	0.0499542	0.0405445	0.0617781	0.0626838	0.0481657	0.0464376	0.0421295	0.0494765
19.3333	3.26015	3.17972	3.30291	3.30809	3.21469	3.19546	3.46968	2.76601	3.77307	3.51217	3.43996	3.21823	3.4393	3.95855	3.75303	3.84209	3.59171	3.59325		19.3333	0.0134165	0.0091739	0.0124577	0.0117262	0.0102707	0.016068	0.0338522	0.00973454	0.05259	0.0382615	0.0450731	0.0359689	0.0578803	0.058227	0.0443761	0.0426876	0.0384805	0.0454591
19.6667	3.29807	3.19082	3.32735	3.31773	3.21752	3.19261	3.46574	2.76808	3.78997	3.52482	3.45122	3.23026	3.45717	3.96887	3.75626	3.84841	3.59263	3.59909		19.6667	0.0119765	0.00744939	0.0102252	0.00948603	0.00858408	0.0133142	0.0299057	0.00777824	0.0475368	0.034192	0.0413473	0.03232	0.0530517	0.0525686	0.0393805	0.0385327	0.0337834	0.0413051
20	3.29392	3.18975	3.32357	3.31601	3.21965	3.2001	3.48085	2.76808	3.80439	3.53838	3.46837	3.2412	3.46541	3.98776	3.77534	3.86532	3.60737	3.61686		20	0.0103913	0.00602653	0.00813139	0.007841	0.00727095	0.010982	0.0259609	0.00611408	0.0427785	0.0306754	0.0376942	0.0286476	0.0483344	0.0461438	0.03385	0.0338562	0.0285032	0.0358586
20.3333	3.29565	3.19261	3.3246	3.32048	3.22142	3.20153	3.48838	2.77014	3.81995	3.54451	3.47625	3.24998	3.48576	4.00629	3.78791	3.87588	3.62113	3.63058		20.3333	0.00899853	0.00469562	0.006441	0.00689897	0.00600168	0.00883292	0.0224489	0.00454271	0.0383686	0.0278087	0.0340784	0.0249428	0.0440926	0.040624	0.0291688	0.0296224	0.0237422	0.0308899
20.6667	3.29911	3.19475	3.32529	3.32323	3.22355	3.20402	3.49556	2.76972	3.83069	3.55158	3.48936	3.25524	3.50013	4.0129	3.78791	3.8793	3.61716	3.63271		20.6667	0.00527487	0.00264186	0.00349751	0.00538157	0.00540224	0.00768715	0.0198772	0.00355248	0.0343819	0.025769	0.0309702	0.021978	0.0391857	0.0367211	0.0262288	0.0270814	0.0200569	0.0280146
21	3.30049	3.19654	3.327	3.32357	3.22602	3.20616	3.49883	2.77219	3.83723	3.56152	3.49883	3.2605	3.50567	4.02692	3.80014	3.89011	3.62754	3.64304		21	0.00583202	0.00226951	0.00348283	0.00493042	0.00463448	0.0063489	0.0165937	0.00289876	0.0311948	0.0230687	0.0275501	0.0199365	0.0354088	0.0332844	0.0237066	0.0253853	0.0170807	0.0262064
21.3333	3.30187	3.19511	3.327	3.32494	3.22673	3.20794	3.50502	2.77178	3.8497	3.56345	3.50274	3.26644	3.52287	4.03844	3.80857	3.90316	3.63515	3.65364		21.3333	0.00533812	0.00185131	0.00273041	0.00376656	0.00357639	0.00511701	0.0138512	0.00224621	0.0283619	0.0207795	0.0246909	0.017854	0.0319684	0.0300583	0.021763	0.0237193	0.0158654	0.0240067
21.6667	3.30187	3.19654	3.32872	3.3246	3.22638	3.20971	3.50729	2.77343	3.85888	3.5708	3.51217	3.27168	3.53161	4.04309	3.81205	3.90939	3.63818	3.6609		21.6667	0.00150976	0.00026457	0.000410634	0.00250152	0.00275872	0.00454683	0.0125926	0.00175053	0.0257951	0.0187746	0.0222061	0.0162137	0.0291547	0.0268938	0.0196281	0.0211833	0.0135319	0.0214908
22	3.30257	3.19582	3.32803	3.32494	3.22814	3.21043	3.51022	2.77425	3.86597	3.57591	3.51801	3.27481	3.54418	4.04937	3.8135	3.90995	3.63667	3.66271		22	0.00169978	-0.00027116	0.000490492	0.00184502	0.00201172	0.00332422	0.0101459	0.0013705	0.0234127	0.0172286	0.0196949	0.0149077	0.0266188	0.0232109	0.016674	0.0181553	0.0105437	0.0185221
22.3333	3.30464	3.19475	3.32837	3.32769	3.2285	3.2122	3.51444	2.77384	3.86921	3.58801	3.52805	3.27969	3.54547	4.05836	3.82276	3.91729	3.64152	3.66753		22.3333	0.000840843	-0.00107804	-4.60987e-05	0.000950356	0.001236	0.00277811	0.00859149	0.000698742	0.0214483	0.0159397	0.0179584	0.0139274	0.0234759	0.0209533	0.0153171	0.0163073	0.00956133	0.016982
22.6667	3.2776	3.18509	3.31291	3.32289	3.23062	3.21575	3.5232	2.77631	3.87775	3.59373	3.5329	3.28455	3.55158	4.06707	3.83056	3.92631	3.6485	3.67566		22.6667	6.75989e-05	-0.00176722	-0.000707253	0.000254456	0.000512993	0.00192197	0.00744795	0.000291777	0.0198565	0.014486	0.0160195	0.013268	0.0212848	0.019351	0.0144521	0.0144692	0.00910526	0.0159319
23	3.3167	3.19725	3.33556	3.33043	3.23026	3.21114	3.51639	2.77507	3.88451	3.59214	3.53354	3.29184	3.56313	4.07359	3.83402	3.93222	3.64668	3.68797		23	-0.000523136	-0.00216196	-0.00127226	-0.000169704	-0.000151508	0.00129472	0.00643711	-0.000522458	0.0185533	0.0128803	0.0143773	0.0123716	0.0195748	0.0168679	0.0121732	0.0117086	0.0068179	0.0136001
23.3333	3.3036	3.19475	3.32769	3.32666	3.22779	3.21327	3.51996	2.77384	3.89214	3.59786	3.54032	3.2953	3.56792	4.08145	3.84352	3.93727	3.6612	3.69126		23.3333	-0.00108556	-0.00222696	-0.0019114	-0.000792014	-0.000699386	0.000702968	0.00529918	-0.00103807	0.0167415	0.0118358	0.0129766	0.0113069	0.0172645	0.015939	0.0115197	0.0105559	0.00674418	0.0126857
23.6667	3.30049	3.19154	3.32632	3.32632	3.22814	3.21291	3.5219	2.77343	3.89771	3.60134	3.54354	3.29876	3.5724	4.07847	3.83748	3.93138	3.64698	3.68497		23.6667	-0.00177414	-0.00248061	-0.00249975	-0.00134658	-0.00106068	0.000187555	0.00452173	-0.00187307	0.0153083	0.0101533	0.0114217	0.0102231	0.0157809	0.0144572	0.0104426	0.00942532	0.00596401	0.011526
24	3.3036	3.19118	3.32597	3.32426	3.22779	3.21256	3.5232	2.77343	3.90064	3.60609	3.5474	3.30153	3.57655	4.08118	3.8395	3.9339	3.6485	3.68887		24	-0.00249165	-0.00251661	-0.00326526	-0.00191816	-0.00156779	-0.000216461	0.00367538	-0.00249787	0.0141272	0.00861654	0.00994396	0.00918732	0.0142572	0.0140747	0.0105119	0.00995171	0.0066458	0.0120636
24.3333	3.29876	3.18975	3.32392	3.32494	3.22673	3.21398	3.52417	2.77137	3.90648	3.60641	3.55126	3.30395	3.58069	4.09227	3.84726	3.94036	3.6609	3.69755		24.3333	-0.00339893	-0.0025409	-0.00412781	-0.00245591	-0.00199355	-0.000737633	0.0028672	-0.00321184	0.0129693	0.00706644	0.00858031	0.00787921	0.013286	0.0124802	0.00892734	0.00873896	0.00568036	0.0110048
24.6667	3.29842	3.1876	3.32151	3.32323	3.22638	3.21149	3.52676	2.77219	3.90911	3.60894	3.55383	3.3074	3.58579	4.0947	3.84956	3.94064	3.65909	3.69994		24.6667	-0.00362707	-0.0026597	-0.00451977	-0.00269422	-0.0023378	-0.0012121	0.00228965	-0.00368092	0.011038	0.00665415	0.00819063	0.00637482	0.0111761	0.0112251	0.00784061	0.00783485	0.00452303	0.0101237
25	3.29669	3.18724	3.32117	3.32323	3.22532	3.21256	3.52611	2.7689	3.91436	3.60989	3.55447	3.30843	3.59056	4.09281	3.84554	3.93812	3.65153	3.69605		25	-0.00697048	-0.00374542	-0.00678779	-0.00340203	-0.00227413	-0.00127118	0.00249788	-0.00396124	0.00937672	0.00658762	0.00768192	0.00484448	0.00913238	0.0101668	0.00729192	0.00710696	0.00408485	0.0090085
25.3333	3.29496	3.18724	3.31773	3.32082	3.2239	3.21185	3.52611	2.7689	3.91552	3.61368	3.55672	3.30947	3.5931	4.10548	3.8573	3.95157	3.66753	3.70889		25.3333	-0.00615765	-0.0036061	-0.00668723	-0.00328484	-0.00244431	-0.00164605	0.00171273	-0.00435072	0.00783934	0.00577013	0.00665454	0.00379531	0.00753778	0.00870854	0.00596069	0.00613266	0.00265029	0.00829969
25.6667	3.29115	3.18545	3.3167	3.31945	3.22461	3.21149	3.52708	2.7656	3.91785	3.61368	3.56024	3.3105	3.59595	4.09955	3.85271	3.94681	3.65818	3.70501		25.6667	-0.00665906	-0.00365552	-0.00682621	-0.00363191	-0.0026548	-0.00196277	0.00120029	-0.0045834	0.00702531	0.00465922	0.00548331	0.00313339	0.00673415	0.00867271	0.00677564	0.00703422	0.00356697	0.00883628
26	3.28907	3.18438	3.31119	3.31876	3.22319	3.21114	3.5274	2.76478	3.92106	3.61494	3.5596	3.31222	3.59754	4.11543	3.8676	3.96357	3.67325	3.72227		26	-0.0073319	-0.00380452	-0.00694294	-0.00399089	-0.00276634	-0.00215048	0.000794758	-0.00491234	0.00607992	0.00385611	0.0049143	0.00211488	0.00534764	0.00732574	0.00574256	0.00580035	0.00224176	0.00712188
26.3333	3.28421	3.1833	3.30809	3.31773	3.22142	3.20936	3.52773	2.76147	3.92338	3.6162	3.56184	3.31257	3.59944	4.1079	3.85845	3.95436	3.66422	3.71425		26.3333	-0.00739512	-0.003877	-0.00676476	-0.00435515	-0.00283716	-0.00239694	0.000485327	-0.00487366	0.00496273	0.00352741	0.00437309	0.00133563	0.00406205	0.00557581	0.00420484	0.00405084	0.000488674	0.00533041
26.6667	3.28559	3.18151	3.30912	3.31636	3.22071	3.20758	3.52805	2.7623	3.92135	3.6203	3.56729	3.31119	3.59564	4.11059	3.86017	3.95632	3.6612	3.71901		26.6667	-0.00806014	-0.00437047	-0.00661514	-0.00453294	-0.00300738	-0.00233885	0.000154642	-0.00483453	0.00432215	0.00286076	0.00395444	0.000647716	0.00296609	0.00408414	0.00271224	0.0021276	-0.000801004	0.00384725
27	3.28247	3.18079	3.30498	3.31532	3.22107	3.20687	3.52805	2.75941	3.9228	3.62251	3.56697	3.3105	3.59754	4.11113	3.86274	3.95408	3.66361	3.71574		27	-0.0084455	-0.00459059	-0.00639106	-0.00459108	-0.00304328	-0.00257962	0.000111996	-0.00444185	0.00361514	0.00223104	0.00356805	0.000352231	0.00212799	0.00368714	0.00246126	0.0014953	-0.000834861	0.00304621
27.3333	3.27969	3.17828	3.30118	3.3136	3.21752	3.20758	3.52676	2.75692	3.92367	3.62156	3.56665	3.31119	3.59627	4.10682	3.85616	3.94933	3.65818	3.71216		27.3333	-0.00850343	-0.0048588	-0.00594585	-0.00456472	-0.00316695	-0.00250973	-1.06417e-05	-0.00415032	0.00321629	0.00153383	0.00309182	0.000107945	0.00171955	0.00287185	0.00164197	0.00058931	-0.00159679	0.00181063
27.6667	3.27551	3.17613	3.30222	3.3105	3.21788	3.20509	3.52708	2.75692	3.92861	3.61683	3.56281	3.31429	3.60419	4.11757	3.87046	3.96525	3.66693	3.72494		27.6667	-0.00832024	-0.00480743	-0.00544234	-0.00449224	-0.0034076	-0.00232242	-0.000341277	-0.00362731	0.00279353	0.00105037	0.00273721	-0.000238538	0.00144737	0.00333592	0.0020943	0.00124297	-0.000706041	0.00224503
28	3.27272	3.17577	3.2998	3.30809	3.21682	3.20545	3.52708	2.75361	3.92687	3.61904	3.56888	3.30981	3.59913	4.11382	3.86331	3.9552	3.6618	3.71514		28	-0.00824537	-0.00496377	-0.00486527	-0.00446528	-0.00337376	-0.00224095	-0.000479914	-0.0033696	0.00285905	-0.000270559	0.00184586	-0.000232837	0.00222919	0.00246133	0.00100421	-5.22232e-06	-0.00160614	0.000797917
28.3333	3.27063	3.17433	3.29876	3.3074	3.21575	3.20402	3.5274	2.75403	3.92658	3.62125	3.56888	3.31085	3.59976	4.11247	3.86017	3.95101	3.65818	3.71484		28.3333	-0.00799779	-0.00490056	-0.00443972	-0.00433049	-0.00315228	-0.00195401	-0.000559898	-0.0029548	0.00270065	-0.000909811	0.00128112	-0.000193054	0.00225542	0.00272763	0.00109869	0.00012786	-0.00124023	0.000969679
28.6667	3.26469	3.16893	3.29634	3.30567	3.21398	3.20402	3.52676	2.7532	3.9289	3.61999	3.5692	3.3105	3.60071	4.10736	3.85501	3.94457	3.65001	3.71216		28.6667	-0.0081175	-0.0047069	-0.00426459	-0.00381421	-0.00310624	-0.00196055	-0.000479906	-0.00264143	0.00309725	-0.00217902	0.000368801	7.9545e-05	0.00298581	0.00234235	0.000476476	-0.000230596	-0.00149418	0.000538881
29	3.26225	3.17073	3.2953	3.30567	3.21362	3.20224	3.52708	2.75278	3.9289	3.61967	3.56952	3.31154	3.60071	4.11811	3.86617	3.95799	3.66301	3.71871		29	-0.00766316	-0.00440007	-0.00374228	-0.00352	-0.00290205	-0.00210787	-0.0003786	-0.00221946	0.00319166	-0.00282425	0.000158104	9.09466e-05	0.00334967	0.00171395	-0.000499895	-0.000995421	-0.00285559	0.000255013
29.3333	3.26155	3.16785	3.29357	3.3036	3.21185	3.2026	3.52708	2.75237	3.92919	3.61967	3.57048	3.31154	3.60198	4.11999	3.86789	3.96106	3.66512	3.72198		29.3333	-0.00704622	-0.004171	-0.00347566	-0.00314042	-0.00246982	-0.00217874	-0.000474687	-0.00195392	0.00272712	-0.00265799	0.000179344	-8.5089e-05	0.002901	0.00158135	-0.000768164	-0.00134462	-0.00321452	0.00027024
29.6667	3.26015	3.16785	3.29357	3.3036	3.21007	3.20295	3.52514	2.75195	3.93007	3.61904	3.57176	3.30981	3.60229	4.12267	3.87075	3.96497	3.66542	3.72821		29.6667	-0.00634205	-0.00386986	-0.00354524	-0.00262377	-0.00221832	-0.0020207	-0.000656053	-0.0017972	0.00248247	-0.00306996	-0.000310857	-4.52949e-05	0.00280603	0.000332399	-0.00202314	-0.00290717	-0.00444093	-0.000837383
30	3.2577	3.16461	3.29149	3.30187	3.20971	3.20082	3.52579	2.7503	3.93471	3.61147	3.56473	3.31222	3.61115	4.11892	3.86274	3.95352	3.65788	3.71693		30	-0.00567074	-0.00371698	-0.00349582	-0.00244258	-0.00183233	-0.0020621	-0.000725403	-0.00158597	0.0028934	-0.00378297	-0.0010174	0.000340783	0.00346843	0.000753169	-0.00129236	-0.00187118	-0.00385859	-0.00013194
30.3333	3.2563	3.16461	3.29219	3.30084	3.21078	3.20153	3.52579	2.7503	3.93152	3.61652	3.56952	3.31085	3.60419	4.11516	3.85902	3.94905	3.65304	3.71514		30.3333	-0.00517819	-0.00343964	-0.00342861	-0.00226083	-0.0015693	-0.00203908	-0.000720069	-0.00160665	0.00247728	-0.00369943	-0.000827523	0.000113585	0.00294167	0.00101872	-0.00112672	-0.00163523	-0.00346925	-0.000156079
30.6667	3.25279	3.16389	3.29011	3.30291	3.209	3.19903	3.52676	2.75071	3.93616	3.60894	3.56505	3.31257	3.6102	4.11731	3.86102	3.9524	3.65395	3.71722		30.6667	-0.00464497	-0.00315031	-0.00318968	-0.00206769	-0.00142343	-0.00202761	-0.000672093	-0.00152487	0.00179328	-0.0032834	-0.000606031	-0.000107942	0.00240969	0.00105841	-0.00119695	-0.00154212	-0.00323384	-4.81166e-05
31	3.25174	3.16389	3.28941	3.2998	3.20936	3.19796	3.52643	2.74905	3.93761	3.60925	3.56633	3.31154	3.61273	4.11328	3.85587	3.94569	3.64456	3.71365		31	-0.00428253	-0.00324013	-0.00306466	-0.00191417	-0.0010838	-0.00199278	-0.000714795	-0.00163475	0.00173089	-0.00338862	-0.000827448	-0.000312415	0.00231528	-0.000522425	-0.00259416	-0.00354416	-0.00504026	-0.0014208
31.3333	3.25139	3.161	3.28837	3.29911	3.20936	3.19796	3.52417	2.74864	3.93297	3.61305	3.56888	3.3105	3.60514	4.11811	3.85931	3.95073	3.6491	3.7196		31.3333	-0.00411646	-0.00289035	-0.00292243	-0.00173231	-0.000808653	-0.00198118	-0.000608126	-0.00166248	0.00163967	-0.00323859	-0.000806295	-0.000318073	0.00204876	-0.000584113	-0.00241013	-0.00335488	-0.00497188	-0.00122429
31.6667	3.25033	3.16136	3.28664	3.2998	3.20971	3.19796	3.52417	2.74864	3.93587	3.60673	3.56441	3.31188	3.61147	4.11301	3.85644	3.94345	3.64426	3.71306		31.6667	-0.00388122	-0.00301052	-0.00257374	-0.00167558	-0.000890982	-0.00185209	-0.000586869	-0.0016149	0.00133347	-0.00286996	-0.000737865	-0.00027261	0.00175113	1.76619e-05	-0.00145715	-0.00207342	-0.00356618	-0.000655603
32	3.24998	3.15956	3.28421	3.29773	3.20936	3.19725	3.52449	2.7478	3.93876	3.60673	3.56633	3.31188	3.61241	4.11838	3.85988	3.95017	3.65001	3.71663		32	-0.00350679	-0.00297022	-0.0023971	-0.00149917	-0.000967214	-0.00180574	-0.000757623	-0.00158106	0.000525601	-0.00216244	-7.3778e-05	-0.000721471	0.000640857	0.00117635	7.0633e-05	-5.16317e-06	-0.00187164	0.000857291
32.3333	3.24717	3.15848	3.28421	3.29842	3.20794	3.19618	3.52482	2.7478	3.93413	3.61052	3.56888	3.3105	3.60767	4.12133	3.86074	3.95129	3.65122	3.7193		32.3333	-0.00324191	-0.00320332	-0.00244354	-0.00147085	-0.00113143	-0.00180019	-0.000752287	-0.00173881	0.000630816	-0.00264257	-0.000632805	-0.000789701	0.0010057	0.00185758	0.000519096	0.000530124	-0.00138829	0.00145497
32.6667	3.24577	3.15739	3.28455	3.29773	3.20651	3.19618	3.52449	2.74739	3.93297	3.60989	3.5692	3.30947	3.60831	4.12187	3.8616	3.95408	3.65213	3.72168		32.6667	-0.00302332	-0.00325785	-0.00212369	-0.00132262	-0.00113747	-0.00161831	-0.000709603	-0.00190361	-0.000167372	-0.0020754	-0.000168819	-0.00112502	-7.83073e-05	0.00110113	1.38525e-05	-0.000286734	-0.0016188	0.00065119
33	3.24682	3.15703	3.28386	3.29773	3.209	3.19511	3.52384	2.74531	3.93761	3.60419	3.56441	3.30981	3.61305	4.11301	3.85444	3.94092	3.64001	3.71097		33	-0.00309381	-0.00317525	-0.00190084	-0.000975148	-0.0010436	-0.00168337	-0.000453534	-0.00176015	0.000124145	-0.00263398	-0.000727931	-0.00112515	0.000187498	0.00193657	0.0010047	0.000875539	-0.000505099	0.00180627
33.3333	3.24471	3.15739	3.28316	3.29669	3.20794	3.19546	3.52449	2.74531	3.93876	3.60451	3.56569	3.3105	3.61336	4.11677	3.8573	3.94681	3.64213	3.71901		33.3333	-0.00313525	-0.00295581	-0.0017812	-0.00100953	-0.000949784	-0.0016776	-0.000256159	-0.00184953	0.000458683	-0.00292118	-0.000996857	-0.00112517	0.000635583	0.000440769	-7.67836e-05	-0.00090721	-0.00194046	0.00040926
33.6667	3.24331	3.15378	3.28525	3.29634	3.20545	3.19511	3.5232	2.74531	3.9379	3.60419	3.56441	3.31085	3.61368	4.12106	3.8616	3.9524	3.64971	3.71901		33.6667	-0.0027938	-0.00299229	-0.00158118	-0.00090118	-0.000738694	-0.00168371	-0.000240141	-0.00178119	-0.00017208	-0.00244723	-0.0006013	-0.00135258	-0.000537004	0.000295404	-0.000336148	-0.000823297	-0.00244557	0.000762775
34	3.24331	3.15305	3.28212	3.29634	3.20651	3.19261	3.52287	2.74448	3.93326	3.60578	3.56792	3.30774	3.60704	4.12374	3.86303	3.95436	3.64971	3.72079		34	-0.00260899	-0.00271877	-0.00136941	-0.000695948	-0.000521789	-0.00154262	-0.000122737	-0.00161011	-0.000501723	-0.00249928	-0.000743584	-0.00148361	-0.000912119	-0.000248511	-0.000704087	-0.00145021	-0.00276959	0.000150695
34.3333	3.24225	3.15161	3.28038	3.29565	3.20545	3.19296	3.52352	2.74323	3.93761	3.60039	3.56313	3.30843	3.61241	4.12348	3.86017	3.95045	3.64365	3.72346		34.3333	-0.00241281	-0.00249863	-0.00150706	-0.00069596	-0.000293142	-0.00130721	-1.06667e-05	-0.00167906	-1.9117e-05	-0.00311087	-0.00109706	-0.00129046	-0.000391031	-0.000442587	-0.000812347	-0.00132936	-0.00287973	0.000166011
34.6667	3.24084	3.15124	3.28143	3.29703	3.20509	3.19261	3.52352	2.74199	3.93268	3.60324	3.56761	3.30671	3.60609	4.11408	3.85444	3.94148	3.6397	3.71246		34.6667	-0.00233208	-0.00227241	-0.00144978	-0.0006447	-0.000146518	-0.00121898	4.26956e-05	-0.00153544	9.61074e-06	-0.00301298	-0.00107619	-0.00113698	-0.0004794	-0.000769806	-0.00116656	-0.00208243	-0.00273531	-0.000460956
35	3.23943	3.15124	3.28108	3.296	3.20723	3.19154	3.52417	2.74323	3.93848	3.59849	3.56216	3.3074	3.61305	4.12749	3.86646	3.95632	3.65001	3.72939		35	-0.00232086	-0.00205204	-0.00145	-0.000576269	-0.000181672	-0.00111904	0.000272142	-0.00148796	-0.00015764	-0.00285259	-0.00089711	-0.00125075	-0.000593766	-0.000185508	-0.00066575	-0.00143586	-0.00209587	0.000279398
35.3333	3.23873	3.15052	3.27934	3.29461	3.20651	3.19225	3.52352	2.74157	3.93761	3.59913	3.56313	3.30774	3.61241	4.11032	3.85243	3.93503	3.63454	3.70978		35.3333	-0.00196742	-0.00176607	-0.00135265	-0.000564949	7.04428e-05	-0.00101309	0.000346859	-0.00146067	-0.000272262	-0.00266964	-0.000923351	-0.00145574	-0.00108924	-0.00113211	-0.00131726	-0.00276553	-0.00283598	-0.00100948
35.6667	3.24084	3.14907	3.27969	3.296	3.20723	3.19118	3.52384	2.7424	3.93326	3.60071	3.56633	3.30602	3.60483	4.11784	3.85616	3.94625	3.63697	3.7199		35.6667	-0.00187502	-0.00136692	-0.00131835	-0.000610638	0.000240508	-0.000724548	0.000544292	-0.00130305	0.00015299	-0.00296834	-0.00129829	-0.00126252	-0.000562864	-0.00199914	-0.00227649	-0.00385124	-0.00356657	-0.00176906
36	3.23873	3.1498	3.28038	3.29565	3.20651	3.19154	3.52482	2.7424	3.93297	3.60071	3.56569	3.30464	3.60546	4.11972	3.85787	3.94681	3.64243	3.71782		36	-0.00161972	-0.00115219	-0.000991993	-0.000616352	0.000217034	-0.000377075	0.000672296	-0.00135155	0.000530498	-0.00308402	-0.00154629	-0.00110932	7.28415e-05	-0.00141476	-0.00163859	-0.00307947	-0.00288153	-0.00114614
36.3333	3.23732	3.14943	3.27864	3.2953	3.20651	3.19225	3.52449	2.7399	3.93732	3.59405	3.56152	3.30671	3.61241	4.11811	3.85673	3.94709	3.63758	3.72079		36.3333	-0.00137034	-0.000823928	-0.00103809	-0.000724862	0.000357773	-0.000406557	0.000613576	-0.0013244	0.000434904	-0.00289708	-0.0013196	-0.00118904	-1.55107e-05	-0.000649258	-0.000816735	-0.00233166	-0.00168604	-0.000964034
36.6667	3.23732	3.14907	3.27969	3.29461	3.20687	3.19118	3.52352	2.74074	3.9379	3.59468	3.56152	3.30705	3.61178	4.11328	3.85271	3.93643	3.63667	3.71187		36.6667	-0.00126615	-0.00071053	-0.00129063	-0.000890439	7.03582e-05	-0.000324089	0.0006509	-0.00145508	0.000845781	-0.00310657	-0.00152008	-0.00118352	0.000448363	-0.000295308	-0.000986914	-0.00224433	-0.00139056	-0.000787519
37	3.23662	3.14871	3.27795	3.29496	3.20651	3.19046	3.52546	2.73907	3.9379	3.59341	3.56152	3.30498	3.61147	4.12053	3.85902	3.94485	3.63818	3.72168		37	-0.00116757	-0.000764423	-0.00133674	-0.000982002	-7.62833e-05	-0.00021214	0.000773519	-0.00153749	0.000320188	-0.00246893	-0.00109276	-0.00134863	-0.000609736	-0.000910083	-0.00149685	-0.00280747	-0.00149034	-0.00167429
37.3333	3.23732	3.14835	3.27864	3.29392	3.20651	3.19082	3.52482	2.7399	3.93384	3.59754	3.56377	3.30291	3.60261	4.11516	3.8553	3.93868	3.63606	3.71365		37.3333	-0.00106883	-0.000561426	-0.00128526	-0.00102775	-7.62794e-05	-0.000200344	0.00087485	-0.00148284	0.000731025	-0.00268896	-0.00156285	-0.00135445	-0.000156251	0.000862891	0.000372471	-0.000697539	0.000295419	0.000675752
37.6667	3.23556	3.14762	3.27795	3.29392	3.20651	3.19154	3.52546	2.74032	3.93732	3.59119	3.55864	3.30498	3.61083	4.11193	3.84898	3.9339	3.63302	3.71008		37.6667	-0.00109792	-0.000322553	-0.00134265	-0.0010277	3.51367e-05	-2.94619e-05	0.000949421	-0.00130431	0.00118001	-0.00251643	-0.00164727	-0.00122942	0.000406658	-0.000522938	-0.00104158	-0.00234436	-0.00086745	-0.0010656
38	3.23732	3.14835	3.2776	3.29426	3.20723	3.19189	3.52643	2.73741	3.93761	3.59119	3.56024	3.30326	3.61115	4.12079	3.85873	3.94401	3.63697	3.72257		38	-0.000644942	-4.78666e-05	-0.00126234	-0.00108495	0.000170022	-8.24922e-05	0.000986677	-0.00114656	0.000597144	-0.00182606	-0.00110358	-0.00134341	-0.000755962	-0.000566879	-0.00110722	-0.00213164	-0.00132824	-0.000564964
38.3333	3.23626	3.14943	3.27621	3.29288	3.20794	3.19046	3.52546	2.73782	3.93819	3.59024	3.56024	3.30326	3.61115	4.11945	3.85845	3.94008	3.64001	3.71663		38.3333	-0.000575324	0.000137289	-0.00117646	-0.00116507	0.000181765	5.30389e-05	0.00103467	-0.000858357	0.0003772	-0.00146599	-0.000892747	-0.00142307	-0.00111008	-0.000699691	-0.00126309	-0.00207686	-0.00102298	-0.00105994
38.6667	3.23485	3.14835	3.27516	3.29253	3.20509	3.19082	3.52611	2.73657	3.93905	3.58992	3.56024	3.30257	3.61115	4.11489	3.85099	3.93559	3.63636	3.71276		38.6667	-0.000563718	0.000358267	-0.00129713	-0.00105661	0.000111408	0.00018857	0.00115721	-0.000693507	0.000405931	-0.00127738	-0.000771189	-0.00141768	-0.00125096	-0.000783588	-0.00138571	-0.00161034	-0.000972627	-0.00107468
39	3.23521	3.14653	3.27516	3.29115	3.20687	3.19118	3.5274	2.73741	3.93558	3.59341	3.56088	3.30187	3.60293	4.11462	3.85271	3.93699	3.63575	3.71306		39	-0.000476553	0.000418026	-0.00121125	-0.000896682	0.000152475	0.00021215	0.00108769	-0.000528766	0.000573145	-0.00144002	-0.000845167	-0.00108197	-0.00072436	-0.000942667	-0.00160258	-0.00201239	-0.00136855	-0.001226
39.3333	3.23591	3.14835	3.27551	3.29184	3.20616	3.19118	3.52708	2.73657	3.93876	3.58865	3.55704	3.30187	3.60957	4.12321	3.86246	3.94597	3.64213	3.72613		39.3333	-0.000645191	0.000471809	-0.00122282	-0.000725385	0.000181805	0.000111969	0.00124219	-0.000453189	0.000549348	-0.00129852	-0.000507042	-0.00112776	-0.000729565	-0.00048669	-0.00103035	-0.00142042	-0.000947351	-0.000617745
39.6667	3.23485	3.14907	3.27551	3.29323	3.20794	3.19189	3.52805	2.73866	3.94021	3.59024	3.55896	3.30187	3.61083	4.11059	3.84496	3.93109	3.62906	3.7071		39.6667	-0.00070926	0.000436009	-0.0011139	-0.00071972	0.000228719	4.1258e-05	0.00124204	-0.000254034	0.000267405	-0.00105856	-0.000285405	-0.000899894	-0.00110494	-0.000114762	-0.00016509	-0.000989671	-0.000856806	-9.76143e-05
40	3.23662	3.15088	3.27586	3.2908	3.20758	3.19082	3.52805	2.73699	3.93529	3.59214	3.56088	3.30049	3.60198	4.11543	3.853	3.93615	3.63241	3.71752		40	-0.000831331	0.000412103	-0.00099345	-0.000519793	0.000181823	4.71574e-05	0.00132182	7.55808e-05	-1.9119e-05	-0.000969395	-0.000137476	-0.00074057	-0.00114659	-0.00101781	-0.00131414	-0.00180871	-0.00154847	-0.00131387
40.3333	3.2345	3.14943	3.27446	3.29011	3.20723	3.19225	3.52773	2.73741	3.93963	3.58738	3.55736	3.30153	3.60894	4.11193	3.84956	3.93222	3.63302	3.70948		40.3333	-0.000784943	0.000215039	-0.000729375	-0.000279915	9.97358e-05	6.48337e-05	0.00138572	0.000192355	4.81061e-06	-0.00118956	-0.000200843	-0.000626652	-0.000484505	-0.000336152	-0.000538545	-0.00092969	-0.000956874	-0.000563586
40.6667	3.23485	3.15016	3.27342	3.29149	3.20651	3.19154	3.52934	2.73824	3.93819	3.59119	3.55992	3.29946	3.60356	4.11301	3.84984	3.93362	3.63454	3.70948		40.6667	-0.000680299	0.000328533	-0.000568581	-5.13995e-05	0.000363582	-0.000100183	0.00129495	0.000419001	-9.54248e-05	-0.00111082	8.97664e-05	-0.000535552	-0.000495058	0.000646279	0.000808546	0.000194623	-4.77182e-06	0.000559327
41	3.23521	3.14907	3.27342	3.29219	3.20723	3.19154	3.52934	2.73699	3.93905	3.58642	3.55768	3.30118	3.60957	4.11704	3.85243	3.93503	3.63058	3.71663		41	-0.000697707	0.000382277	-0.000597304	0.000108576	0.000357594	-0.00025931	0.00143845	0.000391508	-0.000104948	-0.00107399	0.000301156	-0.00043301	-0.000156136	-7.08957e-05	-0.000577947	-0.000550628	-0.000772584	-0.000632847
41.3333	3.23309	3.14943	3.27342	3.29149	3.20758	3.19118	3.53031	2.73741	3.93732	3.5896	3.5612	3.29876	3.60419	4.11543	3.853	3.93503	3.63606	3.71365		41.3333	-0.000691873	-9.55821e-05	-0.000453697	0.000148574	0.000556857	-0.000365393	0.00166724	0.000425863	-0.000448816	-0.000607793	0.000707948	-0.000404515	-0.000640995	-0.000229853	-0.000501358	-0.000480675	-0.000581574	-0.00101446
41.6667	3.23274	3.14907	3.27307	3.29045	3.20794	3.19118	3.53031	2.73741	3.93934	3.58515	3.55736	3.30291	3.60957	4.11999	3.85931	3.93896	3.63484	3.72079		41.6667	-0.000680301	-0.000274718	-0.000258413	0.000348504	0.000586107	-0.000418426	0.00190113	0.000302214	-0.000105012	-0.000985219	0.000274679	-6.90851e-08	6.2852e-05	0.000438115	0.000159786	0.00073574	-0.00049299	0.000313681
42	3.23344	3.15016	3.27307	3.29184	3.20723	3.19118	3.53128	2.73782	3.93616	3.58897	3.56152	3.2998	3.60451	4.11167	3.84697	3.93194	3.63028	3.70859		42	-0.000942161	-0.000483737	-0.000287207	0.000542739	0.000761972	-0.000271096	0.00209787	0.000556295	0.000348595	-0.00117407	0.00014267	0.0001424	0.000865673	-0.000345623	-0.00120301	-0.000157979	-0.00144605	-0.00116876
42.3333	3.23274	3.14798	3.27412	3.29149	3.20616	3.19082	3.53096	2.73866	3.93876	3.58547	3.558	3.30049	3.6102	4.11731	3.85472	3.93699	3.63818	3.71365		42.3333	-0.000820198	-0.000388218	5.73929e-05	0.00054273	0.000832339	-0.000383072	0.00225722	0.000679802	-0.000138577	-0.000723424	0.000422711	3.98822e-05	0.000156426	-8.41715e-05	-0.00109354	-4.19359e-05	-0.00203286	-0.000618723
42.6667	3.23379	3.1498	3.27412	3.29253	3.20865	3.19046	3.53128	2.73949	3.93703	3.58865	3.5612	3.2998	3.60324	4.12133	3.86017	3.94288	3.63849	3.72287		42.6667	-0.00355532	-0.00142319	-0.00126117	0.000257052	0.0011135	0.000388348	0.00283578	0.000830773	-8.60411e-05	-0.000644668	0.00032758	0.000136781	0.000166951	-0.000194762	-0.000766723	0.000198655	-0.00187171	-0.000392832
43	3.23379	3.15052	3.27307	3.29219	3.20936	3.1901	3.53387	2.73866	3.93674	3.58833	3.56056	3.30015	3.60546	4.10978	3.84151	3.92969	3.6251	3.70501		43	-0.00266328	-0.000933229	-0.000382399	0.000593872	0.0011954	0.000394347	0.00258043	0.000974954	0.000128863	-0.000608314	8.45605e-05	0.000114005	0.000156418	-0.000748026	-0.00133382	-0.000338169	-0.0017559	-0.0014034
43.3333	3.23344	3.14762	3.27446	3.29253	3.21007	3.1901	3.53451	2.73866	3.93703	3.58833	3.56184	3.2998	3.60578	4.11489	3.85271	3.93531	3.63362	3.71157		43.3333	-0.0019806	-0.00101062	-3.14368e-05	0.00069672	0.0012715	0.000370878	0.00254293	0.000851336	0.000214866	-0.000676356	-0.000121455	5.13538e-05	0.000260775	-0.000402509	-0.0010256	-0.000161947	-0.0020112	-0.000671818
43.6667	3.23238	3.14871	3.27446	3.29357	3.20971	3.19046	3.53613	2.73824	3.9405	3.58451	3.558	3.30326	3.61052	4.11328	3.84726	3.93615	3.62479	3.71336		43.6667	-0.00164108	-0.00082514	0.000204696	0.000696744	0.00127734	0.000565387	0.002463	0.000645363	4.77585e-06	-0.000346045	0.000169121	-0.000296248	-0.00021885	-0.000849619	-0.001598	-0.000805459	-0.00206669	-0.00136851
44	3.23026	3.14762	3.27202	3.29219	3.20971	3.19154	3.53613	2.7399	3.94021	3.58388	3.55896	3.30084	3.6102	4.11167	3.84467	3.93053	3.62662	3.70501		44	-0.00383734	-0.00163272	-0.00125698	0.0004397	0.00154072	0.0012894	0.00278637	0.000411918	0.000467915	-0.000891509	-0.000427992	6.83493e-05	0.000406752	3.12047e-07	-0.000264145	-7.38575e-05	-0.0014441	-7.32302e-05
44.3333	3.23132	3.14835	3.27481	3.29288	3.20936	3.1901	3.53709	2.74074	3.93645	3.58706	3.56088	3.2998	3.60514	4.11677	3.85013	3.93475	3.62601	3.71306		44.3333	-0.00564903	-0.00235723	-0.00234989	0.000102685	0.00168681	0.00188393	0.00321577	0.000322644	0.000276919	-0.000608326	-0.000216639	-0.000245095	9.40373e-05	-0.000654932	-0.0010303	-0.000916471	-0.0018302	-0.0010743
44.6667	3.20402	3.13818	3.25945	3.29115	3.2122	3.19725	3.54322	2.74115	3.93703	3.58801	3.5612	3.30049	3.60483	4.11731	3.85587	3.94036	3.6318	3.71841		44.6667	-0.00380502	-0.00152625	-0.000976375	0.000330973	0.00158089	0.00184885	0.00262558	0.000123572	0.000749498	-0.000933442	-0.000797954	-0.00010831	0.000901883	-0.000154476	-9.31402e-05	-0.000286614	-0.000656258	-0.000327811
45	3.23521	3.15088	3.28038	3.296	3.21185	3.19118	3.53548	2.74074	3.93992	3.58324	3.55736	3.30153	3.6102	4.11247	3.84755	3.93222	3.62936	3.7074		45	-0.00261229	-0.000951867	-0.000423117	0.000359594	0.00161584	0.00189016	0.00216278	6.18189e-05	0.00104531	-0.000765641	-0.000845528	-0.000102575	0.000849471	0.000633298	0.00133978	0.00071298	0.000693105	0.00089337
45.3333	3.23274	3.14653	3.27621	3.29357	3.21185	3.19082	3.53871	2.7399	3.9379	3.58642	3.55992	3.29946	3.60546	4.11677	3.853	3.93756	3.62936	3.71633		45.3333	-0.00122168	-0.000341708	-7.66383e-05	0.000325388	0.00162744	0.00179599	0.00199252	-0.000212803	0.000773242	-0.000377538	-0.000644665	-0.000387507	0.000385637	0.00064616	0.00113994	0.000772669	0.000728067	0.000971105
45.6667	3.23132	3.14835	3.27551	3.29357	3.21149	3.19332	3.53871	2.73907	3.93674	3.58674	3.5612	3.29911	3.60514	4.11059	3.84352	3.92969	3.62479	3.70531		45.6667	0.000198032	0.000125158	0.000648832	0.000371117	0.00173266	0.0017076	0.00174795	-0.000391274	0.000582332	-5.23806e-05	-0.000248396	-0.000541307	-8.34095e-05	0.000956138	0.00161342	0.000907253	0.00170662	0.00101102
46	3.2058	3.13855	3.2591	3.29253	3.21433	3.19903	3.54418	2.73907	3.94108	3.5826	3.55672	3.30153	3.6102	4.11757	3.85386	3.93812	3.63119	3.71574		46	-0.00107513	-0.000491112	-0.000530666	0.000262686	0.00183769	0.00207162	0.00209238	-0.000617817	0.00120269	-0.000403848	-0.000581289	-8.55545e-05	0.000588884	0.00123931	0.0017364	0.00152752	0.00139029	0.00181091
46.3333	3.20438	3.13636	3.2605	3.29045	3.21504	3.19903	3.54644	2.74032	3.93848	3.58611	3.55992	3.29807	3.60673	4.11167	3.84611	3.93025	3.62571	3.70591		46.3333	-0.000515663	-0.000312539	-0.000553249	0.000178101	0.00183221	0.00212348	0.00198354	-0.000733872	0.00158851	-0.000684202	-0.000726307	-2.18336e-05	0.00104143	0.00102508	0.00130342	0.00120161	0.00134783	0.00121753
46.6667	3.23732	3.15233	3.28212	3.29634	3.21504	3.19439	3.53903	2.73866	3.94253	3.58356	3.55575	3.30153	3.61178	4.11677	3.85415	3.93896	3.63149	3.71722		46.6667	0.000611485	0.000118576	-0.000104176	0.000141841	0.00166505	0.00185942	0.00185363	-0.000749604	0.00152398	-0.00059005	-0.000611975	-8.49168e-05	0.000905402	0.00144994	0.00140909	0.00128667	0.0011043	0.0014859
47	3.23026	3.14835	3.27516	3.29392	3.21504	3.19618	3.54129	2.73907	3.9434	3.58451	3.55704	3.30118	3.61147	4.11489	3.85271	3.93615	3.6318	3.71187		47	-0.00293595	-0.00117466	-0.00239183	-0.000277031	0.00183284	0.00270671	0.00272952	-0.000643653	0.00142645	-0.000196707	-0.000308924	-5.03161e-05	0.000545968	0.00219708	0.00264572	0.0024711	0.00176592	0.00292284
47.3333	3.23168	3.14762	3.27446	3.29392	3.21504	3.19618	3.5429	2.73782	3.93905	3.58642	3.5596	3.29807	3.60609	4.11945	3.85673	3.94092	3.63302	3.7193		47.3333	-0.00139906	-0.000273058	-0.00115295	0.000190525	0.00189891	0.0025165	0.00217377	-0.000499831	0.00185296	-0.00065238	-0.000689207	0.000276526	0.00118559	0.00217506	0.00261203	0.00240094	0.00222288	0.00256015
47.6667	3.23203	3.14907	3.2769	3.29461	3.21611	3.19725	3.5429	2.73866	3.93992	3.58547	3.55992	3.29946	3.60578	4.11811	3.853	3.93699	3.63393	3.71365		47.6667	0.000975966	0.000129625	6.17562e-05	0.00030941	0.00182523	0.00175834	0.00188599	-0.000431414	0.00184052	-0.000454589	-0.000537955	0.000222254	0.000790296	0.0032802	0.00401907	0.00372129	0.00288231	0.00444469
48	3.2058	3.13709	3.25805	3.29219	3.21752	3.2026	3.54837	2.73866	3.94455	3.5826	3.55672	3.30153	3.61178	4.12026	3.85587	3.9412	3.63119	3.7196		48	0.00532075	0.00175075	0.00235735	0.000519963	0.00125437	0.000954757	0.000999894	-0.000580144	0.00105419	0.000170517	0.000412309	-7.39953e-05	-0.00030528	0.00253141	0.0023981	0.00264732	0.0019247	0.00312508

## Sheet: Radius-slope 80s
t (h)	Radius [mm]																						t (h)	Slope
2.66667															0.659898	0.603929							2.66667
3															0.859245	0.821096	0.639484						3
3.33333	0.630104	0.642653						0.567214	0.673851	0.573217					1.00618	0.971533	0.899465	0.68456	0.625505	0.763916			3.33333
3.66667	0.755279	0.884677	0.841043	0.672156	0.73538	0.700417		0.771716	0.819051	0.73227	0.832864	0.642653	0.670457		1.13034	1.09457	1.04074	0.868202	0.882095	0.964684	0.965829		3.66667
4	0.853165	0.987078	0.949371	0.795019	0.91635	0.832864		0.898751	0.929945	0.841043	0.957746	0.76578	0.776139	0.660168	1.23858	1.20144	1.15165	1.01275	1.05025	1.13619	1.1116		4	0.27689	0.289327	0.275651	0.268393	0.330164	0.290541	0.255044	0.291396	0.294023	0.287478	0.264207	0.256246	0.261884	0.247082	0.337036	0.331307	0.326963	0.342292	0.381455	0.350546	0.28413
4.33333	0.951772	1.07875	1.04981	0.903814	1.03228	0.944552		0.991691	1.03006	0.934839	1.05847	0.862475	0.86775	0.753767	1.34879	1.30124	1.24924	1.13521	1.19775	1.25806	1.21425		4.33333	0.275689	0.285102	0.274379	0.26212	0.322895	0.282941	0.248904	0.285344	0.290625	0.285644	0.259953	0.253365	0.258235	0.245133	0.330949	0.324317	0.320411	0.333046	0.365291	0.338036	0.280232
4.66667	1.04655	1.15239	1.13844	0.995136	1.15239	1.04545	0.651469	1.06919	1.12534	1.02005	1.13945	0.945759	0.956554	0.841043	1.44836	1.39946	1.34222	1.24836	1.32063	1.36508	1.30548		4.66667	0.275689	0.285102	0.274379	0.26212	0.322895	0.282941	0.248904	0.281209	0.287832	0.28354	0.256442	0.252876	0.256336	0.243252	0.326429	0.318143	0.315682	0.325039	0.352154	0.328458	0.277138
5	1.1304	1.2309	1.23275	1.07664	1.25112	1.14344	0.743096	1.1514	1.22066	1.11003	1.22439	1.02451	1.03889	0.925024	1.54867	1.49566	1.43379	1.34879	1.42683	1.46279	1.3963		5	0.275212	0.281153	0.272235	0.255586	0.314277	0.274194	0.245019	0.277807	0.286274	0.282616	0.253986	0.252404	0.255002	0.241712	0.310681	0.29945	0.312124	0.318072	0.341145	0.320671	0.274604
5.33333	1.2141	1.32034	1.31861	1.15634	1.3477	1.22718	0.831493	1.22904	1.30644	1.19706	1.30644	1.10385	1.12939	0.995136	1.64084	1.59022	1.52421	1.44607	1.51548	1.55934	1.47857		5.33333	0.274767	0.278646	0.270976	0.252404	0.309593	0.268521	0.243694	0.274522	0.284692	0.281611	0.251776	0.25173	0.254593	0.242009	0.302925	0.291216	0.291692	0.311804	0.331705	0.314214	0.272988
5.66667	1.29415	1.40571	1.40002	1.23367	1.43225	1.30731	0.915104	1.31861	1.39594	1.28353	1.3861	1.17688	1.20845	1.08403	1.74022	1.68275	1.61573	1.53217	1.60544	1.64958	1.56217		5.66667	0.269546	0.262778	0.26936	0.249626	0.305753	0.263898	0.243269	0.258352	0.276363	0.2753	0.250058	0.251892	0.254088	0.241876	0.298441	0.287284	0.286734	0.29421	0.302363	0.293349	0.271652
6	1.38527	1.49385	1.49309	1.31254	1.53825	1.38856	0.990539	1.40896	1.47541	1.37535	1.46532	1.2593	1.28531	1.15733	1.83663	1.77294	1.70752	1.628	1.70039	1.74022	1.65426		6	0.26765	0.261232	0.26461	0.241469	0.292344	0.253348	0.243629	0.252268	0.272698	0.274696	0.243352	0.248117	0.250565	0.242273	0.295037	0.284966	0.285354	0.283162	0.285263	0.280663	0.264296
6.33333	1.48312	1.58932	1.58501	1.38939	1.63462	1.47154	1.06706	1.49385	1.57779	1.47541	1.54639	1.34261	1.3662	1.23829	1.93566	1.86884	1.81179	1.72555	1.79524	1.83	1.74276		6.33333	0.265658	0.261523	0.260756	0.237234	0.286049	0.247115	0.243915	0.24969	0.27026	0.27541	0.239989	0.248586	0.249146	0.241705	0.291462	0.282333	0.284554	0.275178	0.273171	0.273703	0.261762
6.66667								1.58285	1.66778	1.56253	1.62482	1.43304	1.45202	1.31514	2.03747	1.95724	1.91037	1.81483	1.88533	1.92248	1.82939		6.66667	0.263884	0.261309	0.257213	0.235622	0.280473	0.242415	0.244432	0.24683	0.268088	0.275707	0.237294	0.249753	0.248272	0.242163	0.287893	0.278981	0.28277	0.269154	0.264979	0.268241	0.259824
7	1.66847	1.76935	1.75965	1.54639	1.82334	1.63392	1.22811	1.66778	1.76419	1.65955	1.70633	1.51584	1.53528	1.39267	2.1427	2.06656	2.00852	1.90283	1.97298	2.01236	1.91557		7	0.262147	0.259691	0.253314	0.234557	0.275884	0.239188	0.243477	0.242485	0.265672	0.274339	0.23363	0.251516	0.247204	0.243226	0.283683	0.275538	0.279817	0.264682	0.258301	0.263699	0.257514
7.33333	1.75836	1.85805	1.8482	1.62972	1.92203	1.71234	1.30905	1.74795	1.85313	1.74925	1.78412	1.59648	1.62341	1.48158	2.23807	2.16273	2.10314	1.98805	2.05852	2.10156	2.00576		7.33333	0.2589	0.256454	0.248994	0.233479	0.270549	0.236915	0.244036	0.236386	0.263052	0.271575	0.230059	0.252009	0.245434	0.245154	0.278579	0.271656	0.275709	0.260589	0.252006	0.258906	0.255711
7.66667	1.83891	1.94446	1.92973	1.70365	2.0125	1.78668	1.39103	1.82459	1.93623	1.85313	1.86418	1.68615	1.70566	1.55961	2.32954	2.25431	2.20022	2.07935	2.14631	2.19217	2.09313		7.66667	0.253981	0.252069	0.2434	0.232185	0.264189	0.234328	0.244656	0.228928	0.258802	0.267352	0.226083	0.251837	0.244088	0.244915	0.27189	0.267561	0.270068	0.256697	0.245163	0.253615	0.252425
8	1.92559	2.01816	2.00796	1.7822	2.0969	1.86907	1.47618	1.89754	2.02437	1.93858	1.94329	1.77129	1.78476	1.64505	2.41617	2.3409	2.28837	2.16375	2.2242	2.27869	2.178		8	0.247309	0.246464	0.236113	0.230399	0.255726	0.230982	0.244866	0.221408	0.253568	0.261453	0.221895	0.250242	0.242197	0.244884	0.264861	0.262475	0.263101	0.252098	0.238077	0.248129	0.247818
8.33333	2.00512	2.10559	2.0838	1.86173	2.1817	1.95032	1.55815	1.97242	2.1083	2.02606	2.01647	1.85866	1.86846	1.73221	2.50246	2.42074	2.37278	2.24202	2.30233	2.35549	2.25872		8.33333	0.239496	0.239639	0.228811	0.227519	0.247037	0.226871	0.243835	0.214774	0.245727	0.254824	0.216889	0.247455	0.238673	0.242996	0.257314	0.256228	0.255135	0.247572	0.23125	0.242458	0.243581
8.66667	2.0838	2.17961	2.15804	1.93917	2.26382	2.02155	1.64297	2.04009	2.19057	2.10992	2.08216	1.93505	1.94915	1.81204	2.58459	2.50025	2.45249	2.32384	2.37837	2.43168	2.33617		8.66667	0.23138	0.233179	0.220887	0.223736	0.23742	0.222477	0.241474	0.208142	0.238684	0.248453	0.211854	0.243542	0.233379	0.240193	0.248818	0.248771	0.247457	0.243486	0.224966	0.236312	0.239086
9	2.16174	2.26231	2.23542	2.0108	2.33868	2.09853	1.72296	2.10938	2.27036	2.18953	2.1485	2.02268	2.02381	1.89272	2.66791	2.58459	2.53275	2.40563	2.44708	2.51172	2.41297		9	0.229341	0.232411	0.219567	0.222236	0.234995	0.220988	0.239882	0.202388	0.231105	0.241344	0.206495	0.239771	0.228243	0.23609	0.244229	0.243853	0.242571	0.241986	0.22076	0.232657	0.236366
9.33333	2.2344	2.33966	2.30428	2.0849	2.41406	2.16964	1.81015	2.16911	2.34793	2.26533	2.21852	2.09745	2.09853	1.97877	2.74509	2.66543	2.61266	2.48518	2.5148	2.5863	2.49671		9.33333	0.225181	0.230251	0.21585	0.219915	0.229754	0.219	0.236983	0.199106	0.225819	0.236206	0.202114	0.236653	0.224467	0.231565	0.242589	0.241764	0.238807	0.241815	0.218337	0.229442	0.234652
9.66667	2.30527	2.4098	2.37162	2.15804	2.48669	2.24052	1.88487	2.2344	2.41925	2.34161	2.28439	2.17699	2.17384	2.05069	2.82095	2.74791	2.68814	2.56312	2.58715	2.65587	2.56915		9.66667	0.222345	0.229336	0.213648	0.218784	0.2263	0.217559	0.233876	0.196646	0.221052	0.23141	0.198194	0.232913	0.22085	0.227575	0.239968	0.239497	0.234673	0.240222	0.215623	0.225888	0.232839
10	2.38075	2.48302	2.43991	2.23082	2.56261	2.31022	1.95791	2.29684	2.49036	2.41453	2.3523	2.25625	2.25017	2.12501	2.89825	2.82291	2.76195	2.64169	2.65837	2.73137	2.64001		10	0.218887	0.228617	0.211842	0.216135	0.223367	0.215194	0.229847	0.194184	0.215879	0.227854	0.194842	0.228657	0.216736	0.222174	0.236151	0.235411	0.230007	0.237791	0.212742	0.222463	0.230426
10.3333	2.45111	2.55369	2.51044	2.29635	2.63158	2.37835	2.03225	2.36343	2.55369	2.48853	2.41264	2.32793	2.31761	2.19421	2.97354	2.89596	2.8358	2.71554	2.7257	2.80405	2.71595		10.3333	0.214671	0.225988	0.208523	0.212881	0.220221	0.212745	0.223805	0.191056	0.210403	0.22267	0.191557	0.222536	0.211645	0.215365	0.23044	0.229175	0.224217	0.233045	0.209203	0.218102	0.226885
10.6667	2.51996	2.62898	2.57505	2.36633	2.70301	2.44832	2.10667	2.42349	2.62203	2.55994	2.47566	2.39746	2.37739	2.26332	3.03789	2.95901	2.9051	2.78745	2.79141	2.87181	2.78705		10.6667	0.20939	0.221945	0.203979	0.209036	0.215857	0.209153	0.216092	0.186748	0.204113	0.217066	0.187574	0.215211	0.206049	0.20824	0.22282	0.220135	0.217516	0.226104	0.204841	0.212525	0.221154
11	2.59183	2.71018	2.65059	2.43711	2.77631	2.5186	2.18379	2.48348	2.68565	2.63158	2.53576	2.4692	2.44738	2.33135	3.14233	3.06325	3.00055	2.8864	2.87335	2.96274	2.87797		11	0.202825	0.215819	0.197589	0.204686	0.210469	0.203847	0.207139	0.181397	0.197661	0.210644	0.181999	0.205895	0.199792	0.199638	0.213386	0.209245	0.209348	0.217752	0.199277	0.204968	0.214515
11.3333	2.66561	2.79106	2.72194	2.51362	2.85532	2.59667	2.25524	2.55949	2.76601	2.71649	2.60237	2.55191	2.5299	2.40601	3.23351	3.14865	3.07909	2.97577	2.95377	3.03571	2.96237		11.3333	0.19514	0.20836	0.190256	0.199078	0.203381	0.198207	0.196638	0.175132	0.19094	0.202876	0.175204	0.19603	0.191922	0.190157	0.202402	0.197695	0.199797	0.207605	0.192854	0.196375	0.205918
11.6667	2.74032	2.87046	2.79433	2.58963	2.93025	2.67117	2.32989	2.6229	2.83446	2.79147	2.66561	2.6242	2.59447	2.47658	3.29413	3.215	3.14339	3.0408	3.01452	3.09877	3.0306		11.6667	0.186214	0.199189	0.181772	0.192687	0.195016	0.191161	0.185719	0.167576	0.183617	0.193374	0.167598	0.184619	0.183385	0.180504	0.189964	0.185001	0.18953	0.196357	0.184833	0.186719	0.19725
12	2.8037	2.94036	2.8609	2.64801	2.99799	2.7349	2.39508	2.67927	2.89697	2.85651	2.72487	2.68565	2.65532	2.53711	3.35134	3.26514	3.19811	3.10126	3.06974	3.16057	3.09341		12	0.175856	0.188307	0.17195	0.185632	0.185354	0.182996	0.173952	0.158815	0.175763	0.183298	0.159403	0.173086	0.174535	0.170187	0.17673	0.172234	0.178691	0.184196	0.176111	0.175688	0.187136
12.3333	2.85571	3.00104	2.90954	2.70765	3.06163	2.79596	2.44272	2.72989	2.9512	2.90758	2.77672	2.73407	2.71144	2.5861	3.40142	3.31086	3.25022	3.14971	3.12611	3.21156	3.14971		12.3333	0.165374	0.176221	0.160917	0.177487	0.175244	0.174095	0.161573	0.14949	0.167372	0.17246	0.150972	0.161388	0.165757	0.159605	0.162962	0.159099	0.166791	0.171554	0.167004	0.164516	0.17594
12.6667	2.90719	3.04856	2.95892	2.76312	3.11116	2.84411	2.49128	2.76931	2.99951	2.96277	2.82317	2.78041	2.76312	2.63808	3.44565	3.35101	3.30284	3.20053	3.17696	3.26514	3.19535		12.6667	0.154378	0.162838	0.15012	0.168604	0.164449	0.164623	0.148965	0.140012	0.157826	0.161439	0.141615	0.149553	0.156104	0.148417	0.149687	0.145944	0.15469	0.158842	0.157027	0.153267	0.164665
13	2.95275	3.0983	2.99951	2.81791	3.15992	2.89263	2.53531	2.81264	3.05043	3.0128	2.86489	2.82478	2.81142	2.68098	3.48869	3.39459	3.35002	3.25056	3.22187	3.30785	3.25192		13	0.143458	0.149502	0.138303	0.159012	0.153145	0.15456	0.136427	0.130211	0.148484	0.150324	0.132432	0.137342	0.145398	0.137476	0.135961	0.132075	0.142466	0.145744	0.146782	0.141974	0.152638
13.3333	2.99533	3.14145	3.03994	2.86807	3.20473	2.94462	2.57505	2.85132	3.09793	3.05678	2.90562	2.86529	2.85172	2.72278	3.5265	3.43859	3.39199	3.29144	3.2736	3.35002	3.29513		13.3333	0.132859	0.137037	0.127763	0.150152	0.142445	0.144474	0.125089	0.120593	0.138993	0.139491	0.1235	0.125833	0.134858	0.12732	0.126627	0.122034	0.133329	0.136002	0.138665	0.133303	0.143013
13.6667	3.03694	3.18043	3.08206	2.91659	3.24823	2.98846	2.61113	2.89224	3.13927	3.09535	2.94191	2.90287	2.89578	2.75899	3.56484	3.47504	3.43473	3.33514	3.3162	3.39199	3.34375		13.6667	0.123676	0.126246	0.118427	0.142242	0.133427	0.135983	0.11519	0.11362	0.13115	0.131203	0.115485	0.116941	0.126861	0.118618	0.120613	0.115404	0.126232	0.129384	0.132534	0.126593	0.13581
14	3.07353	3.22142	3.11959	2.96316	3.28941	3.03092	2.64887	2.9244	3.18259	3.13891	2.97967	2.94307	2.93764	2.79841	3.60492	3.513	3.4779	3.37664	3.35826	3.43119	3.38579		14	0.116434	0.117657	0.110471	0.136716	0.126583	0.129291	0.107241	0.107851	0.124365	0.124334	0.108191	0.109793	0.119662	0.11153	0.115705	0.110279	0.120178	0.124044	0.126468	0.120469	0.129638
14.3333	3.11226	3.2591	3.15233	3.00142	3.33009	3.0739	2.6848	2.96085	3.22142	3.179	3.01393	2.97661	2.97661	2.83366	3.64001	3.5493	3.51268	3.41569	3.3998	3.4709	3.42829		14.3333	0.110213	0.11048	0.104746	0.131183	0.121134	0.123037	0.100613	0.103243	0.118548	0.11881	0.102447	0.104329	0.113028	0.10579	0.111638	0.10488	0.114084	0.119159	0.120699	0.115292	0.123956
14.6667	3.1469	3.29288	3.19118	3.04594	3.37061	3.11593	2.71691	2.99228	3.2577	3.21823	3.04444	3.01166	3.01015	2.86489	3.68077	3.58494	3.54961	3.45782	3.43602	3.50859	3.47026		14.6667	0.104241	0.104875	0.0986875	0.126013	0.116962	0.117753	0.0942441	0.0993236	0.113279	0.112942	0.0975186	0.0986304	0.10743	0.100241	0.107697	0.0993799	0.108139	0.11444	0.115107	0.110308	0.118638
15	3.1833	3.32872	3.21894	3.08206	3.4053	3.15124	2.7449	3.02376	3.29738	3.2556	3.07798	3.04069	3.04519	2.89854	3.71901	3.619	3.58648	3.49375	3.47504	3.5465	3.50544		15	0.0985548	0.0994667	0.0929044	0.12148	0.113144	0.112292	0.0882507	0.0946325	0.107463	0.107904	0.0925033	0.0929943	0.102371	0.0954636	0.103825	0.093397	0.102816	0.109412	0.109717	0.106289	0.112665
15.3333	3.21327	3.35942	3.25104	3.12616	3.44295	3.18617	2.77343	3.05566	3.3342	3.2908	3.1108	3.0713	3.0765	2.93297	3.75509	3.64607	3.61991	3.52994	3.51488	3.57938	3.54338		15.3333	0.0929969	0.0942526	0.0872444	0.117217	0.109225	0.106356	0.0820935	0.0901859	0.102296	0.103228	0.087418	0.0875437	0.097519	0.0907288	0.0997532	0.087229	0.0976561	0.105054	0.103823	0.10143	0.107258
15.6667	3.24506	3.39019	3.28003	3.16136	3.47888	3.22249	2.80289	3.08908	3.36519	3.32735	3.13818	3.10161	3.1108	2.96085	3.78441	3.67807	3.65213	3.56453	3.54806	3.61686	3.58031		15.6667	0.0873479	0.089322	0.0814134	0.113551	0.104957	0.101101	0.076131	0.0855433	0.0973086	0.0986735	0.0822013	0.0821306	0.0922247	0.0862542	0.0951662	0.081187	0.0918407	0.100174	0.0986382	0.0962724	0.101226
16	3.27412	3.41967	3.30257	3.20473	3.51736	3.25805	2.8268	3.11556	3.3959	3.35602	3.161	3.12653	3.14036	2.98732	3.81669	3.70412	3.68317	3.5997	3.57691	3.64607	3.61411		16	0.0815552	0.0842062	0.0759281	0.110559	0.100361	0.0957417	0.0695448	0.0812398	0.0917769	0.0938382	0.0766767	0.0763612	0.0871316	0.0816875	0.0899461	0.0750752	0.0858701	0.0952174	0.0931377	0.0910312	0.0951229
16.3333	3.29946	3.44394	3.33214	3.23908	3.55029	3.28594	2.84691	3.14363	3.42634	3.38783	3.1901	3.15559	3.16605	3.01545	3.84554	3.72435	3.70889	3.62693	3.60921	3.67476	3.64304		16.3333	0.0753104	0.0792993	0.0702279	0.107135	0.0951105	0.0904572	0.0631696	0.0760686	0.0863981	0.0886781	0.0713588	0.0708216	0.082241	0.0773207	0.0851343	0.0694695	0.0804465	0.0901289	0.087623	0.0853534	0.0884919
16.6667	3.32392	3.47297	3.35058	3.27168	3.58101	3.31636	2.86927	3.16893	3.45684	3.41333	3.2154	3.17505	3.19618	3.03994	3.87075	3.74654	3.73472	3.65969	3.63515	3.70292	3.67265		16.6667	0.0691111	0.0738785	0.0643257	0.103451	0.0893333	0.0851037	0.0571273	0.0710413	0.0810163	0.0836819	0.0660093	0.065261	0.077161	0.0729957	0.0796752	0.0635686	0.0743708	0.0850472	0.0820714	0.0796019	0.0816422
17	3.34479	3.49817	3.36926	3.3074	3.61336	3.34513	2.8875	3.18832	3.47921	3.44162	3.23344	3.19511	3.22213	3.06275	3.89806	3.76743	3.76038	3.68227	3.66271	3.73206	3.69994		17	0.0628278	0.0681069	0.0593243	0.100306	0.0832867	0.0803824	0.0512973	0.0655142	0.0753168	0.0785867	0.0603405	0.0598398	0.0718503	0.0682982	0.0747216	0.0584392	0.0684547	0.0800926	0.0761884	0.0738952	0.0752705
17.3333	3.36587	3.51704	3.39153	3.33693	3.63916	3.36722	2.90051	3.21007	3.50632	3.46672	3.25244	3.21433	3.24436	3.08391	3.92124	3.78411	3.78324	3.71097	3.68617	3.75155	3.72376		17.3333	0.0569262	0.0622424	0.0540758	0.0952467	0.0764107	0.0753086	0.0455598	0.0602061	0.0699762	0.0736519	0.0549248	0.0541743	0.0664421	0.0638553	0.0701612	0.0540378	0.0626341	0.0752031	0.0704885	0.0680459	0.0687748
17.6667	3.38412	3.53935	3.40798	3.37095	3.66322	3.39254	2.91698	3.22921	3.5287	3.4923	3.26819	3.23238	3.26504	3.10492	3.94401	3.79898	3.79985	3.73472	3.71038	3.77329	3.74566		17.6667	0.050944	0.0568689	0.0491443	0.0907096	0.0689689	0.0702612	0.0399672	0.0550982	0.0648286	0.0685561	0.0500698	0.0488829	0.0607195	0.0594985	0.0663229	0.0496786	0.0569817	0.0700672	0.065474	0.0620714	0.0627016
18	3.39892	3.55832	3.42367	3.40496	3.68558	3.415	2.92557	3.24788	3.54676	3.51704	3.28316	3.24612	3.28455	3.12543	3.96246	3.81582	3.8164	3.75685	3.73028	3.79403	3.76332		18	0.0455901	0.0513728	0.044511	0.0850377	0.0616518	0.0646791	0.0353686	0.0504679	0.0591786	0.0640137	0.0453949	0.0441022	0.0551758	0.0552757	0.0625012	0.0458888	0.0517087	0.0650964	0.0605111	0.0570209	0.0569425
18.3333	3.41199	3.57559	3.43465	3.42767	3.7038	3.43731	2.93608	3.26085	3.56569	3.53322	3.29807	3.25875	3.30257	3.14254	3.9861	3.83345	3.83518	3.77739	3.75008	3.81089	3.77885		18.3333	0.0405645	0.0462575	0.0399543	0.0801599	0.0548288	0.0596869	0.031064	0.0459891	0.0538176	0.0590119	0.0406879	0.0396102	0.0501353	0.0508124	0.0589605	0.0424429	0.046791	0.0609225	0.0554349	0.0520011	0.0515962
18.6667	3.42367	3.58547	3.44692	3.45783	3.72009	3.45419	2.9454	3.27586	3.5842	3.55383	3.31085	3.27202	3.31601	3.1592	4.00215	3.84151	3.84755	3.79869	3.76655	3.8271	3.79258		18.6667	0.0362525	0.040764	0.0362908	0.074431	0.0485414	0.0542942	0.0273676	0.0421266	0.0492103	0.0543501	0.0368459	0.0360897	0.0448653	0.0468445	0.0554627	0.0390226	0.0421433	0.0566003	0.0508541	0.0469895	0.0463121
19	3.43432	3.59691	3.45981	3.48739	3.73508	3.47494	2.95352	3.28664	3.59913	3.56952	3.32151	3.28177	3.33112	3.17325	4.02006	3.85644	3.86188	3.81466	3.78207	3.84295	3.80915		19	0.0326485	0.0358722	0.0324907	0.068332	0.0427364	0.0492495	0.0244021	0.0389364	0.0453625	0.0494287	0.0339181	0.0327863	0.0402607	0.0431681	0.0521441	0.0357378	0.0380843	0.0532033	0.0466016	0.0422855	0.041954
19.3333	3.44361	3.60483	3.46968	3.49948	3.74698	3.49001	2.96123	3.30118	3.61336	3.58611	3.33112	3.29045	3.34274	3.18796	4.03597	3.86932	3.87189	3.83287	3.79607	3.853	3.82334		19.3333	0.0294487	0.0315101	0.0287718	0.0625463	0.0378593	0.0443954	0.0218775	0.0358185	0.0412317	0.0446633	0.0307035	0.0300987	0.0360521	0.0394093	0.0493258	0.0332446	0.0345063	0.0496573	0.0429254	0.0382121	0.038245
19.6667	3.45122	3.61999	3.47724	3.52287	3.75428	3.50599	2.96547	3.31222	3.62503	3.59849	3.34069	3.30015	3.35262	3.19689	4.05401	3.87987	3.88215	3.84467	3.81002	3.86446	3.83633		19.6667	0.0266917	0.0275361	0.0257817	0.0568908	0.0333693	0.0397839	0.0191771	0.0328939	0.0376609	0.0401662	0.0278039	0.027674	0.0321148	0.035695	0.0466104	0.0306939	0.0316425	0.0469432	0.0394692	0.0342992	0.0345954
20	3.46014	3.62628	3.48412	3.53645	3.7655	3.51152	2.97315	3.32082	3.63226	3.61273	3.34888	3.30809	3.36044	3.20971	4.06979	3.88727	3.8921	3.85845	3.82103	3.87759	3.84525		20	0.024527	0.0239583	0.0227861	0.0512239	0.0296536	0.0354403	0.0172103	0.0299726	0.0344425	0.0362753	0.0248453	0.02562	0.028785	0.0321885	0.0443063	0.0279229	0.0286618	0.0443744	0.0364548	0.0307718	0.031551
20.3333	3.46541	3.63508	3.49263	3.55639	3.77337	3.52417	2.97661	3.33009	3.64386	3.62219	3.35704	3.31636	3.37264	3.21788	4.08253	3.89522	3.89948	3.87446	3.83172	3.88727	3.85415		20.3333	0.022373	0.0210209	0.0202105	0.0466141	0.0263533	0.0316567	0.0149436	0.0275336	0.0311553	0.0331857	0.0218928	0.0234609	0.0257478	0.0288824	0.041949	0.0255887	0.0259309	0.0419354	0.0335534	0.0279464	0.0285004
20.6667	3.47494	3.63885	3.49883	3.56633	3.78304	3.53193	2.98426	3.33933	3.6573	3.63289	3.36451	3.32392	3.37906	3.2285	4.09362	3.90373	3.90825	3.88699	3.84151	3.89409	3.86102		20.6667	0.020402	0.0184089	0.017646	0.0414796	0.0236156	0.0279634	0.0131162	0.0248972	0.0279979	0.0297583	0.0192574	0.0214239	0.0230967	0.0259123	0.0399649	0.0235919	0.023804	0.0396249	0.0308971	0.025011	0.025657
21	3.48281	3.64355	3.50371	3.5791	3.79087	3.54096	2.98846	3.34922	3.66789	3.64135	3.37332	3.33146	3.38615	3.23838	4.10736	3.9091	3.91729	3.90146	3.85329	3.90089	3.87217		21	0.0186746	0.0155846	0.0152779	0.0371984	0.0214289	0.0244709	0.0114368	0.0224229	0.0251778	0.0268669	0.0171269	0.0195226	0.0207442	0.0231731	0.0379402	0.0213503	0.0216616	0.0381608	0.0284271	0.0226176	0.0227496
21.3333	3.48903	3.64793	3.50827	3.59183	3.79748	3.54676	2.99152	3.35738	3.67411	3.64793	3.37568	3.34035	3.39153	3.24401	4.11999	3.91983	3.92265	3.91391	3.86331	3.90627	3.88016		21.3333	0.0168403	0.0132554	0.0132513	0.0344307	0.0194986	0.0216709	0.00963955	0.0197193	0.0226526	0.0240797	0.0150522	0.0176359	0.0187505	0.0206559	0.0356845	0.0195023	0.0199845	0.0365869	0.0263184	0.0207785	0.0202211
21.6667	3.49295	3.6548	3.51282	3.60609	3.80199	3.55704	2.9919	3.36214	3.68062	3.65574	3.38041	3.34479	3.39657	3.24998	4.13097	3.92519	3.93025	3.92744	3.8716	3.91419	3.883		21.6667	0.0150035	0.0109831	0.0113836	0.0308599	0.0177383	0.0192029	0.00825022	0.0173989	0.0205117	0.0218796	0.013092	0.015314	0.0170177	0.0183627	0.0332791	0.0178026	0.0178774	0.0352263	0.0242537	0.0187524	0.0181628
22	3.49883	3.65574	3.51379	3.61115	3.80888	3.56184	2.99533	3.36519	3.68712	3.66353	3.38277	3.34922	3.40396	3.25524	4.14353	3.92913	3.93419	3.93727	3.87873	3.91983	3.89011		22	0.0132896	0.00929227	0.00962295	0.0277117	0.0155339	0.0170264	0.0067624	0.0152244	0.018525	0.0196881	0.011335	0.0131082	0.0153109	0.0160191	0.0310213	0.016555	0.0157977	0.0333141	0.0222477	0.0166869	0.0165711
22.3333	3.50078	3.65948	3.51736	3.62219	3.81128	3.56952	2.99533	3.37095	3.69176	3.67131	3.38446	3.3516	3.40731	3.2584	4.15472	3.93559	3.9398	3.94653	3.88471	3.92716	3.89352		22.3333	0.0116584	0.00774365	0.00786692	0.0243674	0.0136012	0.0144297	0.00559379	0.0130292	0.0163121	0.0179381	0.0096844	0.0108863	0.0135547	0.0140312	0.0292252	0.0148412	0.0137406	0.0313348	0.0203117	0.0149179	0.014958
22.6667	3.50437	3.65948	3.52028	3.6266	3.81666	3.57016	2.99913	3.37433	3.69516	3.67473	3.38716	3.35568	3.41065	3.26399	4.16296	3.9384	3.94457	3.95548	3.88983	3.92856	3.89919		22.6667	0.00978848	0.00673471	0.00660793	0.0222277	0.0115904	0.0126769	0.0043012	0.010904	0.0144052	0.0161958	0.00795741	0.00890645	0.0124106	0.0121476	0.0273132	0.013303	0.0116741	0.0293164	0.0185709	0.0133881	0.0134029
23	3.5086	3.65979	3.52223	3.6332	3.82204	3.57463	3.00027	3.37737	3.69856	3.67969	3.3922	3.35772	3.416	3.26714	4.1733	3.94401	3.94821	3.96887	3.89579	3.93475	3.90259		23	0.0081836	0.00567574	0.00556047	0.0197452	0.00991681	0.010914	0.00335772	0.00885387	0.0132423	0.0147134	0.00663983	0.00706094	0.0110346	0.010671	0.025264	0.0116883	0.00999182	0.027321	0.016624	0.0116127	0.0116468
23.3333	3.50925	3.66384	3.5232	3.64323	3.82413	3.5775	2.99875	3.3794	3.70318	3.68341	3.39389	3.36078	3.41867	3.27098	4.17859	3.94765	3.95296	3.97749	3.90288	3.9398	3.90543		23.3333	0.00684109	0.0046342	0.00460058	0.0173755	0.00844499	0.00952045	0.00254743	0.00731796	0.0124936	0.0133339	0.00600884	0.00566808	0.00994322	0.00979411	0.0234151	0.00994664	0.00837616	0.025279	0.0150934	0.00998911	0.0105098
23.6667	3.51087	3.66633	3.52384	3.64699	3.82681	3.58037	3.00142	3.38176	3.7078	3.68898	3.3959	3.35942	3.42234	3.27237	4.18493	3.94933	3.95212	3.98554	3.90712	3.94232	3.90967		23.6667	0.00575885	0.00362516	0.00389844	0.0153495	0.0070605	0.00810373	0.00200747	0.00613775	0.011632	0.0120593	0.00522882	0.00466697	0.00887645	0.00906338	0.0214618	0.00845757	0.00673997	0.0232215	0.0138547	0.00820632	0.00968026
24	3.51444	3.66478	3.52514	3.64855	3.82711	3.57974	3.00218	3.38379	3.71149	3.69176	3.39758	3.36078	3.42434	3.27551	4.19021	3.95492	3.9538	3.99164	3.90995	3.94345	3.91362		24	0.00463001	0.00295716	0.0035071	0.0139464	0.00565819	0.00722434	0.00146109	0.00504865	0.010865	0.0110186	0.00457258	0.00370131	0.0077245	0.00846216	0.0196424	0.0071367	0.00537054	0.0212747	0.0127379	0.0066732	0.00863667
24.3333	3.51542	3.66633	3.52514	3.65168	3.8289	3.58133	3.00256	3.38547	3.71518	3.69516	3.39859	3.36146	3.42667	3.27725	4.19917	3.95408	3.95436	3.99938	3.91447	3.94429	3.91588		24.3333	0.00381401	0.00210966	0.00268401	0.0122723	0.00467167	0.00640472	0.00128508	0.0037939	0.0103539	0.0100747	0.00397766	0.00312297	0.00699916	0.00784096	0.0180299	0.00568826	0.00403008	0.0191899	0.0117366	0.00528124	0.00772274
24.6667	3.51607	3.6682	3.52708	3.65979	3.8295	3.58674	3.00218	3.38615	3.71855	3.69794	3.39657	3.36316	3.42967	3.28003	4.2047	3.95771	3.95604	4.0038	3.91955	3.94653	3.91786		24.6667	0.00301435	0.00159122	0.00197916	0.0109471	0.00352855	0.00603972	0.000777005	0.00288597	0.00984944	0.00955179	0.00321706	0.00243348	0.00619266	0.00727742	0.0166775	0.00450069	0.00300026	0.0170164	0.010627	0.00411438	0.00662855
25	3.51607	3.66882	3.52773	3.66197	3.83099	3.58801	3.00104	3.38547	3.72284	3.70071	3.39859	3.3635	3.42933	3.28212	4.21074	3.95743	3.95911	4.01097	3.92068	3.94597	3.91842		25	0.00237084	0.000528713	0.00167469	0.0094693	0.00270641	0.00542787	0.000670423	0.0020068	0.00909853	0.00905436	0.00263956	0.00198545	0.00541453	0.00705963	0.0152697	0.0031757	0.00204559	0.0149077	0.00936649	0.0027167	0.00578305
25.3333	3.51639	3.66851	3.52773	3.66416	3.83188	3.59056	3.00027	3.38682	3.7256	3.70318	3.40094	3.36587	3.43233	3.28559	4.21625	3.95883	3.95771	4.01428	3.92434	3.94821	3.92124		25.3333	0.00188351	-0.000508114	0.00125326	0.00810821	0.00234215	0.00497477	0.00063283	0.000989347	0.00817691	0.00845792	0.00216874	0.00147631	0.00499452	0.00677985	0.0140686	0.00206897	0.00130812	0.0132477	0.00821097	0.00164418	0.0048875
25.6667	3.51736	3.66789	3.52902	3.66696	3.83188	3.59183	3.00142	3.38716	3.72683	3.70687	3.40127	3.36519	3.43399	3.28837	4.2186	3.95716	3.95799	4.01841	3.92744	3.94821	3.92321		25.6667	0.00141755	-0.00108788	0.000826593	0.00722558	0.00194886	0.00449632	0.000450971	0.000116672	0.00753896	0.0077562	0.00173136	0.00124708	0.00451501	0.00655292	0.0125331	0.00117486	0.000921274	0.0118469	0.00733741	0.00107591	0.00398799
26	3.51704	3.66665	3.53031	3.66913	3.83218	3.59278	3.00256	3.38749	3.72897	3.70995	3.40127	3.36451	3.43432	3.29011	4.22358	3.95883	3.95771	4.02116	3.92969	3.94849	3.9249		26	0.00101598	-0.00154466	0.000410627	0.00650792	0.00178656	0.00410231	0.000344507	-0.000772614	0.00677722	0.00720905	0.00142697	0.000665454	0.00426089	0.00610875	0.0111209	0.000327027	0.000244184	0.0106774	0.00640524	0.000618743	0.00317343
26.3333	3.51736	3.66571	3.52773	3.671	3.83337	3.59373	3.00407	3.38648	3.73203	3.71087	3.40261	3.36655	3.43631	3.29045	4.22646	3.95855	3.95799	4.0239	3.93222	3.94905	3.9249		26.3333	0.000924947	-0.00233528	-0.000101281	0.00550838	0.00155063	0.00317399	0.000313222	-0.00140616	0.00605187	0.00663198	0.00114491	0.000246086	0.00400707	0.00583081	0.00950426	4.73212e-06	-0.000395989	0.00930791	0.00540416	5.08464e-05	0.00257343
26.6667	3.51834	3.66633	3.52708	3.67162	3.83307	3.59468	3.00218	3.38682	3.73417	3.71395	3.40228	3.36553	3.43698	3.29323	4.22985	3.95855	3.95855	4.02665	3.93306	3.94765	3.9249		26.6667	0.000737792	-0.00283847	-0.000613189	0.00442782	0.00144243	0.00227202	0.000288196	-0.00215701	0.00525233	0.00614685	0.00074678	-0.000480896	0.00384114	0.00533055	0.00836649	-0.000607741	-0.00102696	0.00833594	0.00442334	-0.000447757	0.00230321
27	3.51866	3.66197	3.52934	3.67317	3.83367	3.59564	3.00294	3.38581	3.73478	3.71732	3.40396	3.36553	3.4383	3.296	4.23221	3.95771	3.95688	4.03022	3.93362	3.94709	3.92603		27	0.000743076	-0.00323962	-0.00106118	0.00398029	0.00110869	0.00172202	4.38451e-05	-0.00265206	0.0044991	0.00561681	2.76703e-05	-0.00076037	0.00379073	0.00475701	0.0071109	-0.000704409	-0.00139074	0.00722115	0.00366655	-0.000812476	0.00190347
27.3333	3.51769	3.66229	3.5274	3.67442	3.83486	3.59627	3.00294	3.38277	3.73569	3.71763	3.40194	3.36417	3.44029	3.29703	4.23377	3.9566	3.95688	4.03159	3.93503	3.94625	3.92603		27.3333	0.000593364	-0.00333271	-0.00150396	0.00356384	0.000927129	0.00126631	-0.000332093	-0.00310814	0.0040943	0.00504194	-0.000569637	-0.00109579	0.00351031	0.00421226	0.00584957	-0.00110973	-0.00155678	0.00657032	0.00278937	-0.00128342	0.00135062
27.6667	3.51866	3.6626	3.52708	3.67442	3.83426	3.59627	3.0037	3.38277	3.73936	3.71855	3.40194	3.36451	3.44063	3.29807	4.23429	3.9566	3.95632	4.0346	3.93615	3.94737	3.92659		27.6667	0.000310024	-0.0035908	-0.00188809	0.00322956	0.00075543	0.000868532	-0.000883576	-0.00336436	0.00380575	0.00448267	-0.000895899	-0.00123008	0.00320343	0.00376555	0.00500307	-0.00133558	-0.00195782	0.00574902	0.00212605	-0.00153288	0.00106263
28	3.51899	3.66073	3.52708	3.6769	3.83515	3.59691	3.00218	3.38041	3.73875	3.71947	3.40228	3.36316	3.44228	3.29876	4.23743	3.9566	3.95492	4.03707	3.93615	3.94681	3.92603		28	-3.74994e-05	-0.00365867	-0.00205899	0.00288068	0.000451289	0.00065914	-0.00119685	-0.00349846	0.00336142	0.00398017	-0.00127756	-0.00142589	0.00307692	0.00342211	0.00415689	-0.00173179	-0.00219763	0.00502385	0.00163461	-0.00182403	0.000890836
28.3333	3.51931	3.65823	3.52514	3.67721	3.83545	3.595	3.00218	3.38041	3.73997	3.72101	3.40161	3.36383	3.44328	3.30118	4.23795	3.9566	3.9538	4.03652	3.93699	3.94513	3.92631		28.3333	-0.000363619	-0.00377285	-0.00211825	0.00274681	6.37515e-05	0.000475971	-0.00149149	-0.00362203	0.00294765	0.00364508	-0.00165927	-0.0017504	0.00271009	0.00299358	0.00337258	-0.00192553	-0.00247443	0.0040513	0.00126385	-0.00182413	0.00089079
28.6667	3.51801	3.65823	3.52514	3.67752	3.83605	3.59595	3.0018	3.3767	3.73966	3.72284	3.39993	3.36044	3.4446	3.30118	4.24029	3.95492	3.95324	4.03898	3.93643	3.94513	3.92913		28.6667	-0.000732554	-0.00383049	-0.00246553	0.00258261	-0.000196214	0.000209198	-0.00164226	-0.0035449	0.0027255	0.00313827	-0.00190842	-0.00167793	0.00237639	0.00242243	0.00276935	-0.00240544	-0.00276076	0.00320567	0.00102301	-0.00187994	0.000774778
29	3.51963	3.65574	3.52352	3.67876	3.83426	3.59564	2.99989	3.37704	3.74027	3.72376	3.39926	3.36282	3.44527	3.30118	4.23951	3.95604	3.9538	4.03898	3.93643	3.94401	3.92772		29	-0.000951788	-0.00355925	-0.00295722	0.00197383	-0.000539594	-7.32419e-05	-0.00188684	-0.00347406	0.00235308	0.00290471	-0.00211329	-0.00167255	0.00202084	0.00202277	0.00238166	-0.00235956	-0.00293217	0.00248692	0.000791474	-0.00194944	0.000607726
29.3333	3.51866	3.65605	3.52223	3.67969	3.83486	3.59659	2.99951	3.3767	3.74241	3.72438	3.39859	3.3618	3.44593	3.30257	4.23821	3.95296	3.95184	4.04117	3.93671	3.94317	3.92716		29.3333	-0.00130491	-0.00349276	-0.00297407	0.00158504	-0.000946821	-8.89198e-05	-0.002025	-0.00348154	0.00193041	0.00272751	-0.00207504	-0.00162249	0.00178546	0.00176033	0.00202874	-0.00268743	-0.00315877	0.0019133	0.000606234	-0.00220861	0.000408257
29.6667	3.51736	3.65262	3.5219	3.68093	3.83456	3.59564	2.99837	3.37568	3.74363	3.7256	3.39859	3.36078	3.44493	3.30291	4.24055	3.9524	3.94989	4.04062	3.93727	3.94232	3.928		29.6667	-0.00177037	-0.00326184	-0.00309753	0.00131903	-0.0011971	-7.32179e-05	-0.00223243	-0.00367797	0.00164841	0.00250474	-0.00244655	-0.00157225	0.00151771	0.00144678	0.00197224	-0.0030337	-0.00312243	0.00129475	0.000509003	-0.00218557	0.000278367
30	3.51574	3.65262	3.52158	3.68031	3.83367	3.59691	2.99913	3.37467	3.74363	3.7256	3.39725	3.3601	3.44692	3.3036	4.24186	3.95157	3.94989	4.04117	3.93756	3.94092	3.928		30	-0.00209154	-0.00294383	-0.00312491	0.00106822	-0.00135407	-5.22864e-05	-0.00235245	-0.00377455	0.00159806	0.00226688	-0.00247456	-0.00142137	0.00120627	0.00120733	0.00170965	-0.00324632	-0.00311856	0.000983259	0.000268362	-0.00220456	0.000269084
30.3333	3.51607	3.65105	3.51996	3.68217	3.83277	3.59691	2.99761	3.3723	3.74424	3.72683	3.39657	3.35874	3.44626	3.30326	4.24055	3.95073	3.94849	4.03926	3.93784	3.94232	3.92856		30.3333	-0.00218798	-0.00260487	-0.00301354	0.000516172	-0.00156521	-0.000172639	-0.00234654	-0.00394881	0.00138182	0.0019887	-0.00244747	-0.00148878	0.0010696	0.000871168	0.00174374	-0.00331608	-0.00328093	0.000757718	0.000282224	-0.00220048	0.00016237
30.6667	3.51509	3.65012	3.51834	3.68186	3.83277	3.59564	2.99647	3.37298	3.74515	3.72683	3.39557	3.35942	3.44626	3.3036	4.24186	3.94681	3.94653	4.04035	3.93756	3.94008	3.928		30.6667	-0.0023543	-0.00253348	-0.0028804	0.000357696	-0.00179123	-0.000366154	-0.0024226	-0.00408469	0.00120085	0.00175109	-0.00245372	-0.00129873	0.000780291	0.000728804	0.0017821	-0.00351103	-0.00342479	0.000595157	0.000300742	-0.00224245	0.000102033
31	3.51509	3.65012	3.51607	3.67845	3.83218	3.59468	2.99647	3.37027	3.74332	3.72866	3.39523	3.35874	3.44692	3.30429	4.24264	3.95017	3.94513	4.04117	3.93756	3.94008	3.928		31	-0.0026062	-0.00211173	-0.00263516	7.66045e-05	-0.00179153	-0.000381824	-0.00239824	-0.00416897	0.000959515	0.00170028	-0.00243195	-0.00142191	0.000682027	0.000540885	0.0018508	-0.00371965	-0.00357348	0.000504957	0.00024059	-0.00218739	0.000292177
31.3333	3.51282	3.65043	3.51639	3.68	3.83069	3.59627	2.99571	3.3679	3.74363	3.72774	3.39456	3.35806	3.44824	3.30429	4.24238	3.94597	3.94429	4.0409	3.93812	3.93756	3.92687		31.3333	-0.00274101	-0.00199372	-0.00235755	-0.000137993	-0.00192423	-0.000611997	-0.00237347	-0.00409171	0.000597701	0.00152856	-0.00233254	-0.00131024	0.00060562	0.000341561	0.00185066	-0.0037721	-0.0033852	0.000342621	0.00010178	-0.00223873	0.000268996
31.6667	3.51185	3.6498	3.51542	3.68093	3.83039	3.59595	2.9938	3.36655	3.74545	3.72866	3.3912	3.3584	3.44725	3.30395	4.24524	3.94513	3.94485	4.04062	3.93812	3.9398	3.92772		31.6667	-0.00286512	-0.00171096	-0.00207442	-0.000357694	-0.00193433	-0.000632932	-0.00232366	-0.00390857	0.000497194	0.00141232	-0.00229971	-0.00126572	0.000594697	0.000113845	0.00158846	-0.00393016	-0.00328449	0.000338129	-1.85167e-05	-0.00216501	0.000171596
32	3.5112	3.64824	3.51477	3.68217	3.83128	3.59595	2.99228	3.36485	3.74515	3.72927	3.39288	3.35806	3.44758	3.30464	4.24446	3.94457	3.94317	4.04172	3.93587	3.93699	3.92856		32	-0.00288716	-0.00184022	-0.00179137	-0.000454766	-0.00178725	-0.000784638	-0.0023303	-0.00368634	0.000421864	0.00132645	-0.00221161	-0.00115944	0.00033278	-0.00014804	0.00161829	-0.00425063	-0.00311866	0.000437299	0.000111007	-0.00223947	0.000264341
32.3333	3.51185	3.64824	3.51412	3.67752	3.8292	3.59373	2.99342	3.36383	3.74515	3.72958	3.39153	3.35636	3.44858	3.30395	4.2455	3.94401	3.94092	4.0409	3.9384	3.93615	3.92856		32.3333	-0.00271052	-0.00228994	-0.00130502	-0.000894448	-0.00171381	-0.00100459	-0.00206694	-0.00332426	0.000472033	0.00114979	-0.0021733	-0.00111476	0.000229142	-0.000216338	0.00144661	-0.00404813	-0.00306428	0.00062211	0.000240537	-0.00225816	0.00027826
32.6667	3.50957	3.64636	3.51444	3.68124	3.82771	3.59468	2.99113	3.36146	3.74515	3.72989	3.39019	3.35704	3.44692	3.30395	4.24628	3.94064	3.94008	4.04281	3.93784	3.93587	3.92913		32.6667	-0.00268439	-0.00260509	-0.00107536	-0.000613354	-0.00156658	-0.000936642	-0.00197947	-0.00309596	0.000421826	0.00105389	-0.00208504	-0.00131102	1.63778e-05	-0.000284637	0.00124467	-0.00374856	-0.00278757	0.000446259	0.000457937	-0.00204111	0.000426652
33	3.5086	3.64793	3.51379	3.68031	3.82801	3.59532	2.99075	3.36316	3.74576	3.73111	3.39052	3.3567	3.44791	3.30395	4.24524	3.9398	3.9384	4.04172	3.93784	3.93531	3.92884		33	-0.00248115	-0.00275489	-0.00103291	-0.00030159	-0.00135554	-0.00104133	-0.00194849	-0.00267246	0.000426867	0.000852102	-0.00202446	-0.0011374	-0.000169106	-0.000387097	0.00121013	-0.00376737	-0.0027883	0.000594909	0.000605949	-0.00208778	0.000408111
33.3333	3.50632	3.64605	3.51412	3.68	3.82741	3.59341	2.99113	3.36214	3.74484	3.73019	3.39052	3.35568	3.44791	3.30429	4.24628	3.93756	3.93868	4.04144	3.93727	3.9339	3.92828		33.3333	-0.00211718	-0.00278609	-0.00129012	-0.00038842	-0.00126245	-0.00119308	-0.00177296	-0.00231545	0.000311332	0.00088231	-0.00185291	-0.00124409	-0.000452829	-0.000466815	0.00107701	-0.00328317	-0.00279814	0.00074361	0.000878756	-0.00209294	0.000459116
33.6667	3.50534	3.64574	3.51412	3.67907	3.82681	3.59405	2.99037	3.36112	3.74576	3.73111	3.38918	3.355	3.44824	3.30291	4.24628	3.93699	3.93756	4.0409	3.93727	3.93447	3.92828		33.6667	-0.00191911	-0.00299856	-0.00130101	-0.000690036	-0.00119868	-0.00130319	-0.00150297	-0.00223239	0.000246002	0.00069066	-0.00168136	-0.00122734	-0.000589284	-0.000478206	0.000905186	-0.00329341	-0.00271072	0.000703052	0.0010915	-0.00230165	0.000352414
34	3.50567	3.64386	3.51314	3.67876	3.82741	3.59341	2.98961	3.3601	3.74515	3.73111	3.38817	3.35568	3.44725	3.30222	4.24785	3.93334	3.93812	4.04254	3.93924	3.9325	3.92941		34	-0.0018605	-0.00284412	-0.00132253	-0.000454867	-0.00111526	-0.00125095	-0.00166711	-0.00200907	0.000251031	0.000604904	-0.00185358	-0.000963987	-0.000752968	-0.00046681	0.000806531	-0.0027108	-0.00240605	0.000730033	0.00153063	-0.00199647	0.000241114
34.3333	3.50762	3.63916	3.51412	3.67566	3.82652	3.59087	2.98999	3.3601	3.74667	3.73111	3.38749	3.355	3.44692	3.30326	4.2455	3.93643	3.93503	4.04309	3.93924	3.93306	3.92884		34.3333	-0.00182875	-0.00275664	-0.00162271	-0.000122669	-0.00102226	-0.00127212	-0.001894	-0.00192553	0.000306251	0.000534298	-0.00172628	-0.00085201	-0.000943991	-0.000426988	0.000870732	-0.00236909	-0.00210113	0.000793122	0.00153039	-0.00196431	0.000204023
34.6667	3.50437	3.6401	3.51217	3.68	3.82711	3.59278	2.98846	3.35908	3.74545	3.73142	3.38716	3.3533	3.44659	3.3036	4.24733	3.93587	3.93643	4.04199	3.94008	3.9325	3.92969		34.6667	-0.0016363	-0.00269526	-0.00174595	-0.000219764	-0.000953562	-0.00134541	-0.00193241	-0.00204931	0.000336369	0.000393149	-0.00178775	-0.00102592	-0.0010642	-0.000495342	0.00119644	-0.00197191	-0.00208307	0.00109921	0.00172916	-0.00192284	0.000324543
35	3.50534	3.64104	3.51087	3.68031	3.82681	3.59183	2.9877	3.35806	3.74515	3.73111	3.38648	3.35534	3.44692	3.30291	4.24863	3.93475	3.9339	4.04445	3.94008	3.93081	3.92884		35	-0.00140584	-0.00256634	-0.00183718	4.09195e-05	-0.0010962	-0.00134552	-0.00222248	-0.00224552	0.000431722	0.000226807	-0.00179901	-0.000908261	-0.00122247	-0.000489663	0.00142365	-0.00156013	-0.00191668	0.00159005	0.00191852	-0.00184432	0.000472894
35.3333	3.50534	3.64073	3.50925	3.68	3.82532	3.59183	2.9877	3.35806	3.74606	3.73203	3.38648	3.35262	3.44527	3.30222	4.24785	3.9339	3.93334	4.04418	3.94176	3.92969	3.92969		35.3333	-0.00143309	-0.00223646	-0.00192302	0.000158524	-0.00142595	-0.0011834	-0.00248113	-0.00222368	0.000587319	0.000211693	-0.00173265	-0.000863525	-0.00124982	-0.000483997	0.00154779	-0.00140314	-0.00189372	0.00207155	0.00207544	-0.00170088	0.000616586
35.6667	3.50469	3.63697	3.51022	3.67628	3.82562	3.58992	2.98808	3.35602	3.74667	3.73142	3.38581	3.35364	3.44493	3.30257	4.24863	3.93109	3.93334	4.04309	3.9412	3.92884	3.92969		35.6667	-0.00164802	-0.00199417	-0.00196079	0.000230129	-0.00146041	-0.00104726	-0.00253831	-0.00218494	0.000782931	2.51955e-05	-0.00167756	-0.000824308	-0.00127176	-0.000501176	0.00177482	-0.00121337	-0.00163459	0.00242239	0.00203817	-0.00157119	0.000625828
36	3.50306	3.63916	3.51022	3.68	3.82532	3.59087	2.98464	3.35704	3.74576	3.73203	3.3848	3.355	3.44527	3.30291	4.24706	3.93559	3.93306	4.04445	3.94401	3.92997	3.92913		36	-0.00179837	-0.00171066	-0.00180562	-0.000214815	-0.00163262	-0.00100556	-0.0024441	-0.00224149	0.000943504	8.56659e-05	-0.00173353	-0.000841148	-0.00117365	-0.000546739	0.00190752	-0.001107	-0.0015051	0.0028941	0.00200073	-0.00145098	0.00058871
36.3333	3.50209	3.63853	3.50729	3.67938	3.82353	3.58929	2.98426	3.35602	3.74667	3.73203	3.3848	3.3533	3.44427	3.30222	4.24993	3.93222	3.93306	4.04418	3.94317	3.92884	3.92913		36.3333	-0.00201874	-0.00133888	-0.0018059	-0.000189155	-0.00196755	-0.000780424	-0.00248865	-0.00221939	0.000888279	6.55097e-05	-0.0016003	-0.000796383	-0.00116831	-0.000575192	0.00214747	-0.00129223	-0.00128314	0.00342892	0.00197283	-0.00126094	0.000885246
36.6667	3.50143	3.63665	3.5086	3.68	3.82443	3.59024	2.9835	3.35364	3.74667	3.73142	3.38311	3.3516	3.44328	3.30153	4.25227	3.93138	3.93109	4.048	3.94345	3.92856	3.93081		36.6667	-0.00179361	-0.00125609	-0.00153299	-0.000644198	-0.00227781	-0.000817063	-0.00248316	-0.00219188	0.00107897	3.52737e-05	-0.00155045	-0.000723514	-0.00118483	-0.000580912	0.00216414	-0.00102828	-0.00128323	0.00372101	0.00188018	-0.00104784	0.00110293
37	3.50274	3.63759	3.50762	3.67969	3.82323	3.58929	2.98197	3.35398	3.74759	3.73111	3.38379	3.35296	3.44394	3.30187	4.25149	3.93334	3.93194	4.04882	3.94485	3.928	3.93081		37	-0.00199792	-0.00100276	-0.00137778	-0.000598143	-0.00243077	-0.000481883	-0.00242688	-0.00218675	0.00102375	4.12969e-10	-0.00143944	-0.00102655	-0.00115219	-0.000506914	0.00227096	-0.000861628	-0.0010101	0.00379226	0.00189372	-0.00063528	0.00121879
37.3333	3.50013	3.63634	3.50729	3.67907	3.82025	3.58929	2.9812	3.35296	3.74789	3.73142	3.38311	3.35194	3.44361	3.30153	4.25253	3.93053	3.93109	4.05101	3.94569	3.928	3.93138		37.3333	-0.00200363	-0.000723697	-0.00122778	-0.000541901	-0.00248041	-0.000408592	-0.0024148	-0.00237811	0.000968453	-7.05535e-05	-0.00141183	-0.000892035	-0.00109782	-0.000638025	0.00245495	-0.000708785	-0.000926743	0.00393587	0.00179638	-0.000412729	0.00120946
37.6667	3.49948	3.63571	3.50632	3.67876	3.82264	3.59024	2.9812	3.35262	3.74972	3.7308	3.38176	3.35228	3.44295	3.30049	4.25357	3.93194	3.93194	4.05155	3.94569	3.92828	3.93109		37.6667	-0.00190195	-0.000341215	-0.00130831	-0.000500995	-0.0025052	-0.000157172	-0.00242832	-0.00235627	0.0010035	-0.000131043	-0.00118404	-0.00106036	-0.00116349	-0.000581044	0.00251022	-0.000588331	-0.000847992	0.00406105	0.00183305	-0.000333899	0.00141783
38	3.50013	3.63477	3.50697	3.67442	3.82115	3.58801	2.98197	3.35126	3.74911	3.73233	3.38075	3.35194	3.44295	3.30118	4.25383	3.93081	3.93081	4.0551	3.94709	3.92659	3.93109		38	-0.00179491	-0.000423922	-0.0010671	-0.000838448	-0.00238735	-0.000220038	-0.00208853	-0.00232841	0.00109875	-0.00020664	-0.000883917	-0.00113338	-0.000955929	-0.000501295	0.00261253	-0.000796829	-0.000746086	0.00392498	0.00164805	-0.000403477	0.00156132
38.3333	3.49817	3.63602	3.50534	3.67876	3.81786	3.5896	2.98005	3.3516	3.74819	3.73172	3.38244	3.35126	3.44228	3.30187	4.25435	3.93109	3.92997	4.05619	3.94653	3.92828	3.93362		38.3333	-0.00173065	-0.000144738	-0.000718654	-0.000725961	-0.00218582	-8.90711e-05	-0.00211426	-0.00212128	0.000837813	-0.000201603	-0.000939718	-0.00111126	-0.000737487	-0.000387393	0.00240617	-0.000361431	-0.000760095	0.00393694	0.00179096	-0.000143786	0.0015704
38.6667	3.49915	3.63728	3.50567	3.67752	3.81756	3.58929	2.97852	3.35024	3.74941	3.73172	3.38142	3.3516	3.44162	3.30084	4.2559	3.93166	3.92997	4.05537	3.94709	3.92716	3.93419		38.6667	-0.00172547	9.8278e-05	-0.000670366	-0.000823172	-0.0022206	-0.000303925	-0.00203265	-0.00200958	0.00080763	-0.000146164	-0.000967778	-0.00120125	-0.000611862	-0.000313342	0.00249542	-0.000245571	-0.000727773	0.00380454	0.00178142	-1.85565e-05	0.00149606
39	3.4972	3.63759	3.50534	3.67783	3.81696	3.59056	2.9789	3.34956	3.7488	3.73142	3.38142	3.34922	3.44162	3.30084	4.25642	3.93053	3.93025	4.05646	3.94849	3.92884	3.93306		39	-0.00181176	8.79521e-05	-0.000477344	-0.00069026	-0.00191565	-0.000314418	-0.00181828	-0.0022122	0.000647047	-0.000297398	-0.0009845	-0.00152701	-0.000590005	-0.000188	0.00260644	-7.41187e-05	-0.000815862	0.00380329	0.00194692	8.3487e-05	0.0015006
39.3333	3.49687	3.63634	3.50567	3.67721	3.81666	3.58865	2.97775	3.34717	3.74972	3.73142	3.38041	3.35058	3.44063	3.29911	4.2572	3.93081	3.93025	4.05673	3.94877	3.92828	3.93334		39.3333	-0.00162403	0.000315478	-0.000311084	-0.00065456	-0.00165987	-0.000398247	-0.00166055	-0.00211712	0.000621904	-0.000393163	-0.000795455	-0.00157212	-0.000360561	-9.11476e-05	0.0027854	0.000134378	-0.000542384	0.00380628	0.00204348	0.00012524	0.00155598
39.6667	3.49654	3.63697	3.50437	3.6769	3.81696	3.58992	2.97584	3.34751	3.75032	3.7305	3.38142	3.3499	3.44029	3.30118	4.25824	3.93081	3.93025	4.05891	3.94961	3.92772	3.93531		39.6667	-0.00162422	0.000336178	-8.58111e-05	-0.000490914	-0.00149236	-0.000555471	-0.00168605	-0.00212879	0.000391177	-0.000317547	-0.000656442	-0.00166208	-0.000207598	-0.000119645	0.00302416	0.00013901	-0.000514569	0.00389923	0.00212165	2.31984e-05	0.00153733
40	3.49589	3.63602	3.50567	3.6769	3.81666	3.58865	2.97699	3.3482	3.75093	3.7308	3.3821	3.34922	3.44262	3.30084	4.25954	3.93025	3.92997	4.06	3.94933	3.92687	3.93559		40	-0.00168899	2.58429e-05	4.29335e-05	-0.000501233	-0.00103946	-0.00044019	-0.00152201	-0.00216308	0.000315965	-0.000372979	-0.00061749	-0.00161732	-6.55385e-05	-0.000102541	0.00305794	0.000227065	-0.000162299	0.00374555	0.00212134	8.35063e-05	0.00136124
40.3333	3.49589	3.63697	3.50599	3.67721	3.81637	3.58929	2.97546	3.34751	3.74911	3.7308	3.37906	3.34786	3.44195	3.30049	4.26006	3.93138	3.92856	4.06272	3.95073	3.92856	3.93587		40.3333	-0.00146866	-0.00027931	0.000214577	-0.000695632	-0.000581455	-0.000644565	-0.0011307	-0.00221969	0.000331017	-0.000131065	-0.000695347	-0.00174688	0.000158469	-5.12517e-05	0.00326655	0.000111211	-0.000287533	0.00416133	0.00211199	3.71018e-05	0.00128221
40.6667	3.49524	3.63697	3.50567	3.67535	3.81457	3.58738	2.97546	3.34615	3.75093	3.73111	3.37839	3.34751	3.44162	3.30049	4.26187	3.93138	3.92828	4.06462	3.95129	3.92828	3.93615		40.6667	-0.0013665	-0.000481005	8.58225e-05	-0.000429686	-0.00044842	-0.0006236	-0.00096666	-0.00211906	0.000215643	7.5575e-05	-0.000623091	-0.00171896	0.000409775	0.000188016	0.00347491	8.80509e-05	-0.000315329	0.00450097	0.00200565	0.000287503	0.00142091
41	3.49393	3.63634	3.50534	3.67628	3.81547	3.58801	2.97622	3.3441	3.75032	3.72958	3.3794	3.34615	3.44129	3.30153	4.26135	3.93278	3.92856	4.0649	3.95408	3.92828	3.93615		41	-0.00107614	-0.000491348	6.97369e-05	-0.000245535	-0.000226675	-0.000670773	-0.000998441	-0.00211392	0.00017052	0.000241903	-0.000606417	-0.00154505	0.000464426	0.000307659	0.00365356	0.000185377	-0.000296759	0.00473667	0.0019085	0.000236487	0.00161049
41.3333	3.49393	3.63759	3.50567	3.67504	3.81487	3.58801	2.97622	3.34513	3.75124	3.73019	3.38007	3.34649	3.44228	3.30084	4.26447	3.93109	3.93081	4.0668	3.95352	3.92828	3.93756		41.3333	-0.000823259	-0.000341368	-0.000139522	-2.04758e-05	2.95608e-05	-0.000566038	-0.000783721	-0.00206376	-5.01461e-05	0.000428378	-0.000378295	-0.00156757	0.000502687	0.000341859	0.00377651	9.73299e-05	-0.000370957	0.00494975	0.00194046	0.000602762	0.00148536
41.6667	3.49361	3.63697	3.50632	3.67628	3.81607	3.58706	2.9743	3.34376	3.74941	3.73142	3.37974	3.34615	3.44162	3.2998	4.26602	3.93194	3.92913	4.06816	3.9538	3.92687	3.93727		41.6667	-0.000629569	-0.000439628	-0.000252195	0.000173903	0.000182335	-0.000618456	-0.000587851	-0.00200192	-2.50694e-05	0.000564466	-0.000317061	-0.00145546	0.000508105	0.000341761	0.00380975	0.000227055	-0.000292118	0.00495208	0.00189407	0.000862393	0.00139718
42	3.49263	3.63446	3.50632	3.67442	3.81547	3.58833	2.97507	3.3424	3.74911	3.7308	3.37974	3.34615	3.44195	3.30118	4.26498	3.93138	3.93109	4.06789	3.95436	3.928	3.93699		42	-0.000425104	-0.00035169	-0.000520474	0.000296682	0.00042379	-0.000555641	-0.000600479	-0.00204723	-4.00992e-05	0.000700494	-9.45059e-05	-0.00137146	0.00036055	0.00045	0.00409007	0.000208526	-0.000245747	0.00473584	0.00205482	0.000839233	0.00147106
42.3333	3.49361	3.6354	3.50599	3.6769	3.81607	3.58738	2.97546	3.34206	3.75063	3.73203	3.3794	3.34376	3.44262	3.30084	4.26835	3.93053	3.92744	4.07223	3.95408	3.92884	3.93896		42.3333	-0.00015603	-0.000356839	-0.000627787	0.000445032	0.000591344	-0.000482255	-0.000417203	-0.00181132	5.01709e-05	0.000700509	0.000228154	-0.00118053	0.000305925	0.000535441	0.00452362	0.000301125	-0.000282857	0.00476496	0.00210025	0.00065838	0.00150793
42.6667	3.49361	3.63508	3.50469	3.6769	3.81577	3.5877	2.9743	3.34172	3.75063	3.73233	3.37872	3.34479	3.44361	3.30187	4.27016	3.93109	3.92884	4.07304	3.95492	3.93025	3.93952		42.6667	3.23143e-05	-0.000315458	-0.000568755	0.000680313	0.000655428	-0.000277847	-0.000448808	-0.00162046	3.00934e-05	0.000735785	0.000200338	-0.00111882	0.000289548	0.000484181	0.00516922	0.000463264	-0.000468345	0.00495976	0.00237116	0.000769664	0.0015078
43	3.49361	3.6354	3.50534	3.67721	3.81666	3.58706	2.97315	3.34069	3.75032	3.73203	3.37872	3.34479	3.44262	3.30187	4.27068	3.93166	3.92913	4.07576	3.95576	3.92884	3.94036		43	0.00030678	-0.000248218	-0.00055801	0.000746753	0.000655363	-0.00026211	-0.000455124	-0.0015139	0.000155458	0.00071061	1.66893e-05	-0.000978361	0.000355076	0.000410133	0.00569575	0.000472547	-0.000384861	0.00491385	0.00253162	0.000922615	0.00147067
43.3333	3.49458	3.63634	3.50371	3.67721	3.81756	3.58674	2.9743	3.34035	3.74941	3.73264	3.38041	3.34445	3.44262	3.30118	4.27197	3.93109	3.92772	4.07766	3.95688	3.93138	3.93952		43.3333	0.000430564	-0.000196478	-0.000627759	0.0008337	0.000758785	-7.86396e-05	-0.00034768	-0.00148024	0.00030086	0.00054929	-6.12111e-05	-0.000888401	0.000278582	0.000501275	0.00592752	0.000898674	-0.000268921	0.00459521	0.00298221	0.000848465	0.00153047
43.6667	3.49393	3.63508	3.50404	3.67752	3.81696	3.58674	2.97469	3.34172	3.75093	3.73233	3.37974	3.34342	3.44361	3.30291	4.27275	3.93306	3.92884	4.07874	3.95716	3.93138	3.94064		43.6667	0.000468252	4.14212e-05	-0.000600921	0.000618872	0.000679902	5.24153e-06	-0.000278201	-0.00120466	0.00049641	0.000403116	1.11325e-05	-0.000714121	0.000284053	0.000495578	0.00619828	0.00108389	-0.000143742	0.00425005	0.00321641	0.000853092	0.00162276
44	3.49393	3.63602	3.50371	3.67721	3.81756	3.58611	2.9743	3.33933	3.75002	3.73356	3.38007	3.34274	3.44295	3.30222	4.27663	3.93194	3.92828	4.07766	3.95967	3.92969	3.9412		44	0.000586627	0.000294851	-0.000472159	0.000572857	0.000655271	0.000146757	-0.000341424	-0.00108663	0.00056656	0.000413174	0.000150235	-0.000528581	0.000360454	0.000239224	0.00669389	0.0011812	3.31635e-08	0.00405208	0.00356519	0.000755577	0.00171489
44.3333	3.49491	3.63602	3.50371	3.67752	3.81726	3.58706	2.97469	3.34001	3.75032	3.73233	3.38007	3.34342	3.44162	3.30257	4.27973	3.9339	3.92744	4.08199	3.96051	3.92941	3.94148		44.3333	0.000392855	0.000325838	-0.000273641	0.000378393	0.000472966	0.000372153	-0.000303492	-0.00103042	0.000551461	0.000347619	0.000239269	-0.000298062	0.000420486	7.97458e-05	0.00686479	0.00131083	0.000306042	0.00363037	0.00385407	0.000639629	0.00152975
44.6667	3.49393	3.6354	3.50469	3.67814	3.81666	3.58738	2.97392	3.33898	3.75124	3.73294	3.37974	3.34274	3.44262	3.30187	4.28463	3.9339	3.92716	4.08416	3.96302	3.93081	3.94176		44.6667	0.000317515	0.000480959	-1.60886e-05	0.000398834	0.000330094	0.00057655	-0.000158079	-0.00104183	0.000776998	0.000372795	0.000311601	-0.0003318	0.000475096	-0.000119612	0.00703651	0.00151891	5.56145e-05	0.00357547	0.00389452	0.000556168	0.00161733
45	3.49524	3.6354	3.50437	3.67876	3.81816	3.58738	2.97392	3.3383	3.75093	3.73233	3.37906	3.34308	3.44394	3.30187	4.28541	3.93278	3.92997	4.08307	3.9633	3.93194	3.94204		45	9.685e-05	0.000620526	0.000139531	0.000327245	0.000162572	0.000749522	-0.000385844	-0.00100816	0.000922353	0.000433234	0.000150231	-0.000168701	0.00057888	-6.83488e-05	0.00709356	0.00157895	0.000134471	0.00352032	0.00386139	0.000611788	0.00179263
45.3333	3.49524	3.63571	3.50371	3.67845	3.81876	3.58833	2.97392	3.33864	3.75185	3.73294	3.37906	3.34342	3.44328	3.30257	4.28695	3.93559	3.93025	4.08307	3.96497	3.93025	3.94401		45.3333	-5.38366e-05	0.000708412	0.000423909	0.000240323	0.000157633	0.000791461	-0.000619862	-0.000811018	0.000867229	0.000337514	0.000111261	-8.99829e-05	0.000688059	5.68867e-06	0.00704775	0.00165288	0.000213328	0.00366614	0.00375472	0.000583877	0.00201873
45.6667	3.49458	3.63602	3.50404	3.67721	3.81816	3.58738	2.97315	3.33898	3.75154	3.73294	3.37974	3.34342	3.44328	3.30257	4.28799	3.93559	3.928	4.08361	3.96525	3.93138	3.94401		45.6667	-9.07543e-09	0.000982413	0.000541925	0.000235202	0.000167494	0.00073381	-0.000854001	-0.000794144	0.000796977	0.000503694	6.67452e-05	8.43716e-05	0.000748095	-0.000119607	0.00649283	0.00161095	0.000162328	0.00379887	0.00366178	0.000773857	0.00218448
46	3.49589	3.63665	3.50404	3.67783	3.81786	3.58897	2.97354	3.33796	3.75245	3.73356	3.38075	3.34342	3.44493	3.30153	4.29236	3.93447	3.92969	4.08632	3.96803	3.9325	3.94541		46	-5.91972e-05	0.00109089	0.000654587	0.000332319	0.000103457	0.000707588	-0.000828709	-0.000433755	0.0010174	0.000498644	3.3372e-05	0.000118125	0.000873689	-0.000193683	0.00595395	0.00183753	0.000162353	0.00419393	0.0035913	0.000848027	0.0024195
46.3333	3.49426	3.63728	3.50437	3.67876	3.81726	3.58865	2.97354	3.33796	3.75245	3.73386	3.38041	3.34342	3.44493	3.30118	4.29468	3.93587	3.92913	4.0874	3.96915	3.93194	3.94429		46.3333	-0.000160955	0.00124036	0.000693107	0.000283037	0.0001066	0.00061034	-0.00089371	-0.000423001	0.000998206	0.000641061	6.72658e-05	7.87462e-05	0.000955607	-0.000210255	0.00564359	0.00179358	0.000150575	0.00405175	0.003559	0.000813878	0.00254442
46.6667	3.49458	3.63791	3.50502	3.67876	3.81726	3.5896	2.97392	3.33693	3.75367	3.73386	3.38075	3.34308	3.4446	3.30118	4.29571	3.9384	3.92744	4.08929	3.96943	3.93194	3.94597		46.6667	-0.000160263	0.00142	0.000719034	0.000236827	5.70798e-05	0.000572305	-0.000889744	-0.000270333	0.00096178	0.000641681	0.000119676	0.000120986	0.00082208	-0.000169672	0.00532955	0.00194492	-1.52593e-05	0.00430478	0.00344844	0.000666959	0.00265822
47	3.49328	3.63853	3.50534	3.67814	3.81756	3.58929	2.97123	3.33693	3.75337	3.73417	3.3794	3.34376	3.44427	3.30257	4.297	3.93756	3.92913	4.09119	3.97026	3.93222	3.94737		47	-0.000344272	0.0015112	0.000911387	0.000265025	-0.00015212	0.000531833	-0.000976988	-0.000192667	0.00101703	0.00072224	0.000135031	4.96272e-05	0.0007347	-0.000226214	0.00541069	0.00207759	-0.000357974	0.00488949	0.00352906	0.000649061	0.00273433
47.3333	3.49393	3.63822	3.50599	3.67783	3.81846	3.58897	2.972	3.33898	3.75215	3.73325	3.38075	3.34274	3.4456	3.30291	4.29983	3.93812	3.92884	4.09308	3.9711	3.93334	3.94821		47.3333	-0.000326458	0.00155246	0.0011067	0.000449714	-0.000149395	0.000413315	-0.00105552	-0.000205087	0.000957528	0.000656918	-1.68725e-05	-1.04968e-08	0.000844617	-0.000311023	0.00530202	0.00186669	-0.000253114	0.00528333	0.0034525	0.000843292	0.0027161
47.6667	3.49491	3.63947	3.50632	3.67876	3.81786	3.58865	2.97047	3.33727	3.75337	3.73539	3.37906	3.34376	3.4456	3.30187	4.29803	3.93868	3.92913	4.09362	3.97249	3.93334	3.94989		47.6667	-0.000256489	0.00156804	0.00116246	0.000664623	6.40394e-05	0.000442859	-0.00109668	-9.76628e-05	0.00103132	0.000654713	-0.000313446	1.21764e-05	0.000757047	-0.000222187	0.00501779	0.00215542	7.0373e-05	0.00549089	0.00346991	0.000592239	0.00301995
48	3.49458	3.63979	3.50632	3.67969	3.81786	3.58929	2.972	3.33864	3.75519	3.73447	3.37974	3.34342	3.4456	3.30049	4.30162	3.94036	3.92856	4.09766	3.97499	3.9325	3.95101		48	-0.000349722	0.00151191	0.00125542	0.00049841	0.000256151	3.4061e-05	-0.0013571	0.000292929	0.000911794	0.000556459	-0.000614809	3.65516e-05	0.000461247	-8.14875e-08	0.00413381	0.0024662	-0.000210933	0.00538325	0.00313097	0.000451677	0.00323966

## Sheet: Radius-slope 90s
t (h)	Radius [mm]													t (h)	Slope
2.66667	0.661894													2.66667
3	0.800738		0.606109	0.677229	0.573217									3
3.33333	0.917594	0.76578	0.716521	0.806418	0.692225	0.596623	0.688921	0.70052	0.67644	0.865653	0.743385			3.33333
3.66667	1.03006	0.917594	0.817657	0.911356	0.817657	0.727581	0.817657	0.854084	0.877068	1.01493	0.918915	0.679699		3.66667
4	1.13945	1.03889	0.918837	1.00767	0.926257	0.834233	0.927488	0.968115	1.00067	1.15069	1.04392	0.814337		4	0.3246	0.307765	0.291487	0.291502	0.316691	0.297769	0.301308	0.288808	0.313702	0.281759	0.295618	0.276899
4.33333	1.2493	1.15437	1.01331	1.11003	1.02562	0.927488	1.02228	1.06799	1.10162	1.24125	1.14587	0.916507		4.33333	0.32325	0.301864	0.294349	0.290126	0.315212	0.297964	0.299051	0.282465	0.303339	0.2752	0.286137	0.27086
4.66667	1.34346	1.24289	1.10281	1.20939	1.12635	1.02228	1.13141	1.15644	1.20694	1.33313	1.24658	1.00728		4.66667	0.322047	0.297567	0.296794	0.28899	0.314302	0.298427	0.297767	0.280746	0.295752	0.270835	0.2794	0.266603
5	1.45438	1.33921	1.1942	1.29855	1.2309	1.1223	1.22997	1.24392	1.29869	1.40734	1.32314	1.09457		5	0.317807	0.294304	0.297523	0.287823	0.313268	0.29943	0.297711	0.278838	0.289901	0.26804	0.274	0.264602
5.33333	1.54195	1.42586	1.28264	1.3861	1.33238	1.21504	1.31861	1.32981	1.38916	1.48454	1.40576	1.18009		5.33333	0.313999	0.290768	0.296884	0.282371	0.309426	0.300397	0.297813	0.278389	0.285544	0.266263	0.269975	0.263681
5.66667	1.65404	1.51659	1.39267	1.47308	1.42906	1.3108	1.40896	1.4136	1.47032	1.5657	1.48826	1.26069		5.66667	0.31033	0.279317	0.29615	0.279576	0.30638	0.298892	0.293135	0.271172	0.268223	0.255651	0.255656	0.262592
6	1.7745	1.61566	1.50147	1.56836	1.53677	1.40896	1.5045	1.50009	1.5565	1.65292	1.56923	1.34304		6	0.30829	0.272749	0.293704	0.277189	0.304196	0.300427	0.291273	0.269646	0.26104	0.251114	0.249037	0.255446
6.33333	1.8709	1.70097	1.61	1.66915	1.6388	1.51584	1.60503	1.57976	1.63477	1.73131	1.64421	1.42218		6.33333	0.304121	0.266702	0.290275	0.274352	0.301622	0.302397	0.289494	0.269631	0.25658	0.251588	0.246554	0.252691
6.66667	1.97473	1.79369	1.715	1.76289	1.74337	1.61778	1.70432	1.68668	1.7217	1.81727	1.72811	1.50524		6.66667	0.300258	0.262539	0.284814	0.271908	0.29745	0.303144	0.285757	0.270146	0.252503	0.25166	0.244728	0.251608
7	2.08709	1.88608	1.80637	1.85436	1.84325	1.72363	1.80952	1.77231	1.80751	1.90516	1.80812	1.59646		7	0.29632	0.258209	0.277072	0.26977	0.291435	0.302251	0.282271	0.269261	0.250284	0.252495	0.244508	0.250546
7.33333	2.16701	1.96837	1.89934	1.94387	1.94505	1.82709	1.91012	1.87239	1.89585	1.9936	1.89177	1.68668		7.33333	0.290922	0.253031	0.267612	0.266755	0.285097	0.300099	0.277928	0.266661	0.247914	0.251625	0.242688	0.249563
7.66667	2.25979	2.0518	1.98511	2.03113	2.04289	1.93033	1.99542	1.96737	1.97522	2.07669	1.98081	1.76919		7.66667	0.282685	0.246429	0.256223	0.26253	0.278118	0.295619	0.271707	0.262855	0.245912	0.249512	0.239894	0.248549
8	2.36874	2.13839	2.06123	2.11694	2.13037	2.03056	2.09146	2.05691	2.06013	2.16579	2.06013	1.84743		8	0.276691	0.240429	0.245699	0.257151	0.269703	0.28946	0.263908	0.257207	0.242412	0.246042	0.236051	0.246167
8.33333	2.44272	2.20562	2.14052	2.20096	2.21852	2.12769	2.17646	2.13961	2.14064	2.24989	2.14631	1.92937		8.33333	0.272493	0.235432	0.235894	0.251064	0.260998	0.281029	0.255386	0.250542	0.239116	0.241716	0.231214	0.242907
8.66667	2.53486	2.28439	2.21337	2.28439	2.30181	2.22211	2.25423	2.2237	2.21673	2.32336	2.21773	2.01291		8.66667	0.270168	0.230774	0.227805	0.246139	0.252259	0.271983	0.246974	0.241536	0.235112	0.235943	0.224997	0.238106
9	2.63851	2.36777	2.28589	2.36729	2.37835	2.31071	2.33478	2.29897	2.29849	2.40425	2.29512	2.08996		9	0.26441	0.224939	0.223263	0.242685	0.246435	0.263881	0.240846	0.233351	0.230672	0.229202	0.217487	0.232122
9.33333	2.71018	2.4343	2.35908	2.44738	2.46179	2.39603	2.4117	2.36999	2.37185	2.47894	2.36439	2.16936		9.33333	0.259727	0.220108	0.220261	0.239632	0.24198	0.256149	0.237116	0.22515	0.226248	0.222682	0.209543	0.227161
9.66667	2.78861	2.50133	2.43054	2.52449	2.54205	2.47658	2.48623	2.44527	2.44889	2.55491	2.43168	2.24842		9.66667	0.249323	0.21313	0.217411	0.235419	0.237159	0.248055	0.233665	0.218511	0.222832	0.216575	0.202449	0.223496
10	2.88829	2.5808	2.50224	2.60106	2.61636	2.55816	2.55949	2.5148	2.51567	2.6249	2.49583	2.3186		10	0.238481	0.206953	0.214146	0.23042	0.231954	0.238765	0.228904	0.214082	0.220844	0.211392	0.197361	0.220588
10.3333	2.97162	2.65274	2.5675	2.67074	2.68565	2.62855	2.63245	2.58715	2.59142	2.69101	2.55923	2.38996		10.3333	0.226375	0.199414	0.209038	0.224375	0.22513	0.229186	0.223835	0.212579	0.219993	0.20827	0.193834	0.217641
10.6667	3.07761	2.72947	2.63591	2.74864	2.75775	2.7009	2.70428	2.65171	2.66543	2.75795	2.62279	2.45655		10.6667	0.212555	0.190789	0.202638	0.216752	0.216847	0.218909	0.217637	0.211531	0.219346	0.206359	0.192264	0.214926
11	3.12288	2.78082	2.72026	2.83406	2.85172	2.78902	2.79474	2.71392	2.73137	2.81899	2.67495	2.52006		11	0.196792	0.180952	0.194394	0.207693	0.207465	0.207973	0.209727	0.210023	0.217374	0.202868	0.189825	0.211411
11.3333	3.19404	2.84771	2.79678	2.90993	2.93375	2.86449	2.878	2.78507	2.79971	2.88564	2.73501	2.59312		11.3333	0.183919	0.172558	0.185023	0.197872	0.196234	0.196788	0.200668	0.207339	0.214648	0.198948	0.186824	0.207016
11.6667	3.22744	2.89026	2.85492	2.9697	2.99304	2.93025	2.94152	2.85289	2.8722	2.95003	2.8005	2.66708		11.6667	0.168374	0.162289	0.174691	0.187606	0.184681	0.185039	0.190487	0.202374	0.210261	0.193755	0.182468	0.201134
12	3.29149	2.95468	2.90993	3.03092	3.04968	2.98158	3.00066	2.92784	2.95677	3.02184	2.86835	2.74187		12	0.152944	0.151341	0.163672	0.177108	0.17237	0.173389	0.179676	0.195944	0.204805	0.187107	0.177037	0.194572
12.3333	3.32357	2.99037	2.95661	3.08687	3.09904	3.03694	3.05305	3.01305	3.03279	3.09627	2.93952	2.81232		12.3333	0.139635	0.141593	0.151999	0.166159	0.159524	0.161637	0.168162	0.188174	0.197176	0.178885	0.170233	0.186328
12.6667	3.37906	3.04294	3.00027	3.13455	3.14291	3.08428	3.10272	3.08052	3.10304	3.16546	3.00534	2.87989		12.6667	0.128941	0.133706	0.139825	0.154903	0.146382	0.149834	0.156152	0.179225	0.189073	0.169328	0.162664	0.176976
13	3.40798	3.07835	3.03994	3.17828	3.18867	3.12689	3.14907	3.13458	3.16127	3.21638	3.05639	2.93275		13	0.122271	0.126677	0.128534	0.144199	0.133573	0.138316	0.144551	0.169265	0.180096	0.159163	0.154651	0.166133
[truncated: 105 more rows]

## Sheet: Radius-slope 100s
t (h)	Radius [mm]																																												t (h)
[truncated: 137 more rows]
[truncated: 39 more columns]
